# Supplementary material for: A new molecular subclassification and in silico predictions for diagnosis and prognosis of papillary thyroid cancer by alternative splicing profile
Source: Front Pharmacol. 2023 Mar 6;14:1119789. doi: 10.3389/fphar.2023.1119789 (PMC10025316; doi:10.3389/fphar.2023.1119789)
Supplement: Supplementary file 2 [file DataSheet2.xlsx]

## Sheet: Table S1
Table S1. PSI value of 8833 alternative splicing events in 442 PTC samples.
AS events	TCGA-BJ-A0YZ	TCGA-BJ-A0Z0	TCGA-BJ-A0Z2	TCGA-BJ-A0Z3	TCGA-BJ-A0Z5	TCGA-BJ-A0Z9	TCGA-BJ-A0ZA	TCGA-BJ-A0ZB	TCGA-BJ-A0ZC	TCGA-BJ-A0ZE	TCGA-BJ-A0ZG	TCGA-BJ-A0ZH	TCGA-BJ-A0ZJ	TCGA-BJ-A18Y	TCGA-BJ-A190	TCGA-BJ-A28R	TCGA-BJ-A28T	TCGA-BJ-A28V	TCGA-BJ-A28W	TCGA-BJ-A28X	TCGA-BJ-A28Z	TCGA-BJ-A290	TCGA-BJ-A291	TCGA-BJ-A2NA	TCGA-BJ-A3PR	TCGA-BJ-A3PT	TCGA-BJ-A3PU	TCGA-BJ-A45C	TCGA-BJ-A45D	TCGA-BJ-A45E	TCGA-BJ-A45F	TCGA-BJ-A45G	TCGA-BJ-A45H	TCGA-BJ-A45I	TCGA-BJ-A45J	TCGA-BJ-A45K	TCGA-BJ-A4O8	TCGA-CE-A13K	TCGA-CE-A27D	TCGA-CE-A3MD	TCGA-CE-A3ME	TCGA-CE-A481	TCGA-CE-A482	TCGA-CE-A483	TCGA-CE-A484	TCGA-CE-A485	TCGA-DE-A0XZ	TCGA-DE-A0Y2	TCGA-DE-A0Y3
clinical variants	Classical	Classical	Follicular	Classical	Classical	Tall Cell	Classical	Classical	Classical	Classical	Follicular	Tall Cell	Classical	Classical	Classical	Classical	Classical	Classical	Classical	Tall Cell	Classical	Tall Cell	Classical	Classical	Classical	Classical	Classical	Classical	Follicular	Classical	Classical	Follicular	Classical	Tall Cell	Tall Cell	Follicular	Classical	Classical	Classical	Classical	Classical	Classical	Classical	Classical	Classical	Classical	Classical	Classical	Classical
C1orf159_13_AD	0.2347	0.2885	0.6182	0.4499	0.5401	0.35	0.3151	0.3727	0.3802	0.651	0.5287	0.6737	0.3863	0.7157	0.5421	0.3542	0.3052	0.5083	0.3832	0.7508	0.5011	0.6103	0.2748	0.6458	0.5733	0.4048	0.232	0.6762	0.3646	0.6257	0.7272	0.6773	0.8921	0.7417	0.342	0.7556	0.5055	0.3942	0.4916	0.6954	0.4235	0.6159	0.7364	0.4959	0.8214	0.6269	0.6446	0.41	0.6691
C1orf159_20_AA	0.184784	0.141	0.2503	0.0249	0.2323	0.159	0.2244	0.1558	0.0397	1	0.1786	0.2331	0.0522	0.1196	0.1085	0.0724	0.0532	0.1087	0.1132	0.1259	0.1067	0.3272	0	0.185	0.2713	0.0655	0.082	0.1886	0.184784	0.6716	0.2567	0.1655	0.1532	0.2062	0.3864	0.2684	0.3307	0.1733	0.0851	0.2803	0.1861	0.221	0.4813	0.2626	0.271	0.2777	0.2769	0.1523	0.2167
ATAD3A_176_AA	0.1828	0.275	0.551	0.37	0.3626	0.2693	0.3546	0.4233	0.1835	0.1781	0.4807	0.4454	0.4102	0.3725	0.3593	0.275	0.399	0.5397	0.3468	0.5724	0.2673	0.4549	0.1647	0.4156	0.4922	0.4454	0.4783	0.5641	0.4133	0.4829	0.5925	0.5323	0.3333	0.5105	0.5571	0.6528	0.6735	0.4695	0.3216	0.6657	0.3598	0.7836	0.7458	0.7797	0.909	0.7392	0.6101	0.3479	0.2389
MIB2_199_AD	0.4952	0.3813	0.363	0.2551	0.2797	0.375348	0.2859	0.375348	0.6837	0.375348	0.6174	0.4516	0.3659	0.327	0.3235	0.3228	0.7725	0.5016	0.375348	0.375348	0.2066	0.375348	0.615	0.2729	0.3131	0.7225	0.375348	0.51	0.5624	0.1918	0.4142	0.1473	0.4108	0.375348	0.2638	0.359	0.4461	0.6456	0.471	0.375348	0.466	0.2335	0.74	0.1863	0.3141	0.5408	0.4512	0.5356	0.5658
MIB2_200_AA	0.5752	0.4809	0.5669	0.386	0.6701	0.5301	0.4341	0.4504	0.4037	0.8024	0.373	0.3564	0.6701	0.5752	0.6083	0.4763	0.6929	0.3529	0.461371	0.461371	0.3191	0.6286	0.5038	0.6617	0.6435	0.3607	0.1841	0.5149	0.381	0.4744	0.5946	0.5279	0.5038	0.3259	0.6505	0.4616	0.5265	0.4616	0.3573	0.3259	0.4216	0.4128	0.4293	0.3772	0.6286	0.4155	0.3672	0.4183	0.2959
NPHP4_356_AA	0.0692	0.6445	0.5708	0.7206	0.3833	0.4916	0.5732	0.4266	0.4293	0.439325	0.5856	0.439325	0.6074	0.4916	0.525	0.5154	0.439325	0.6074	0.439325	0.5078	0.392	0.4037	0.3006	0.4916	0.3259	0.2165	0.5473	0.3868	0.3767	0.439325	0.4204	0.4085	0.4532	0.392	0.3472	0.381	0.2438	0.5593	0.3495	0.518	0.5211	0.4344	0.4622	0.3259	0.6929	0.4112	0.3731	0.3833	0.3462
TNFRSF25_426_AA	0.862942	0.862942	0.7437	0.9176	0.7435	1	0.862942	0.9424	0.862942	0.862942	0.8641	0.6395	1	0.6941	0.7154	0.8582	1	0.9112	1	0.8661	0.8574	0.9224	0.862942	1	0.8573	1	0.8283	0.8203	0.6073	0.9308	0.862942	0.6215	0.845	0.9365	0.7905	0.9317	0.8133	1	0.8037	0.7494	0.8976	1	0.8474	0.9058	0.9209	0.8088	0.893	0.8081	0.862942
PER3_516_AD	0.5856	0.6611	0.4861	0.7173	0.6175	0.3499	0.5184	0.6411	0.5805	0.4683	0.6312	0.7007	0.7743	0.6687	0.5125	0.6663	0.495	0.5121	0.657267	0.373	0.7078	0.643	0.6895	0.8566	0.409	0.8115	0.657267	0.7188	0.657267	0.485	0.713	0.5894	0.7078	0.6175	0.7842	0.6716	0.744	0.8635	0.4594	0.7361	0.5924	0.6628	0.594	0.5495	0.9271	0.5567	0.6217	0.5813	0.5562
ERRFI1_534_AA	0.4212	0.5061	0.8308	0.2358	0.4246	0.4737	0.8477	0.3842	1	0.580665	0.4641	0.6558	0.580665	0.7108	0.7974	0.2542	0.7672	0.5705	0.580665	0.7786	0.544	0.4037	1	0.3219	0.4375	1	0.580665	0.7176	0.392	1	0.6644	0.6506	0.5372	0.4143	0.2601	0.864	0.862	0.4884	0.1684	0.7362	0.6944	0.6528	0.3584	0.2536	0.9479	0.8761	0.5259	0.7184	0.5738
ERRFI1_535_AA	0.7964	0.8222	0.9706	0.7217	0.7712	0.7898	0.9475	0.7742	1	0.7752	0.8027	0.9012	0.9208	0.958	0.9557	0.7154	0.9232	0.8969	0.87774	0.9147	0.8179	0.8031	1	0.8594	0.8712	1	0.87774	0.93	0.3955	1	0.9228	0.9054	0.8845	0.815	0.7442	0.9844	0.9621	0.8678	0.6472	0.9688	0.9593	0.8919	0.8102	0.7737	0.9815	0.973	0.8901	0.9259	0.8197
AGTRAP_670_AA	0.3786	0.1703	0.7079	0.3447	0.2622	0.4367	0.4977	0.5668	0.4367	0.4659	0.4698	0.3037	0.3828	0.6004	0.4253	0.6079	0.5377	0.4209	0.5377	0.6846	0.4042	0.6223	0.247	0.4241	0.5492	0.6079	0.2054	0.5054	0.2794	0.195	0.6268	0.7949	0.3304	0.2794	0.6223	0.644	0.5467	0.3925	0.411	0.5757	0.408	0.6779	0.5377	0.3972	0.8612	0.5377	0.6163	0.4714	0.4659
FBLIM1_775_AA	0.2789	0.7437	0.465012	0.2789	0.3259	0.5301	0.3259	0.3259	0.465012	0.465012	0.3745	0.4622	0.4129	0.3559	0.3672	0.4716	0.465012	0.7946	0.465012	0.392	0.6074	0.4462	0.5101	0.2087	0.4293	0.3259	0.465012	0.6851	0.6171	0.2249	0.4916	0.3672	0.4362	0.3672	0.45	0.6237	0.3993	0.6351	0.4678	0.6592	0.3672	0.3086	0.4293	0.4362	0.3767	0.4755	0.2789	0.3849	0.5301
C1QC_1014_AD	0.1927	0.286317	0.2708	0.3082	0.2452	0.3466	0.3577	0.1566	0.286317	0.286317	0.2946	0.4006	0.29	0.3823	0.286317	0.2184	0.3231	0.286317	0.3924	0.2995	0.1557	0.2708	0.286317	0.2363	0.1913	0.2816	0.1101	0.286317	0.1408	0.2777	0.405	0.2708	0.1984	0.3044	0.3311	0.286317	0.5619	0.2481	0.2967	0.2435	0.3577	0.2708	0.1566	0.3727	0.5269	0.3311	0.2627	0.286317	0.286317
C1orf213_1057_AD	0.2893	0.3026	0.4245	0.3608	0.5627	0.447897	0.3855	0.3869	0.289	0.4449	0.2385	0.4311	0.4561	0.4099	0.6002	0.5674	0.447897	0.541	0.447897	0.447897	0.5304	0.3172	0.3422	0.3808	0.447897	0.2905	0.3711	0.4642	0.419	0.5143	0.4597	0.478	0.4396	0.5647	0.3648	0.4691	0.447897	0.3426	0.5807	0.488	0.3256	0.625	0.6596	0.4925	0.4535	0.3733	0.5437	0.5381	0.1449
C1orf63_1146_AA	0.5252	0.4112	0.6958	0.5383	0.603	0.6422	0.642	0.6605	0	0.7403	0.7942	0.6758	0.5762	0.8008	0.7494	0.5349	0.5775	0.5948	0.2716	0.7507	0.4361	0.717	0	0.5083	0.6305	0.5486	0.639	0.7735	0.6786	0.6803	0.796	0.6569	0.6873	0.6977	0.6275	0.8085	0.8697	0.6578	0.5686	0.7909	0.5909	0.7284	0.8438	0.6359	0.6651	0.797	0.7617	0.3378	0.4941
MTFR1L_1206_AA	1	0.7922	1	0.7644	0.9311	0.893	0.7688	0.5295	0.6953	1	1	0.9174	0.7737	0.7036	0.7806	0.9537	1	0.778	0.870268	0.6942	0.870268	0.6176	0.5557	1	0.8175	0.7453	0.870268	0.8231	1	0.870268	1	0.9567	1	0.816	1	0.8554	0.9229	0.9276	1	0.870268	0.7777	0.6877	0.8755	0.5422	1	0.8814	0.7973	1	0.8554
MTFR1L_1216_AD	0.7255	0.5139	0.4253	0.3641	0.6132	0.2483	0.7351	0.6491	0.6491	0.4422	0.4977	0.5139	0.5924	0.5432	0.5996	0.4073	0.7745	0.5692	0.608827	0.2839	0.3814	0.7255	0.3978	0.2934	0.7255	0.704	0.608827	0.663	0.209	0.6789	0.8339	0.5772	0.7351	1	0.4422	0.9041	0.7872	0.5311	0.3978	0.3978	0.6132	0.626	0.7676	0.4253	0.608827	0.5996	0.7255	0.704	0.6491
MTFR1L_1217_AD	0.8781	0.813	1	0.7796	0.7992	0.826402	0.9135	1	1	0.826402	1	0.4693	0.7086	0.7604	1	0.6185	0.7419	1	0.826402	0.826402	0.4363	0.8273	1	0.7086	1	1	0.826402	0.8496	0.826402	0.6592	1	0.8984	0.8392	1	1	1	0.7814	0.869	1	1	1	1	0.7542	1	0.826402	1	0.6098	0.5702	1
CEP85_1244_AA	0.1802	0.4085	0.2339	0.2661	0.3424	0.3006	0.3833	0.6351	0.2339	0.30265	0.5801	0.2293	0.2249	0.2249	0.4639	0.2789	0.3259	0.311	0.30265	0.2789	0.2438	0.2087	0.2789	0.3403	0.2529	0.3672	0.4916	0.1947	0.3559	0.30265	0.1325	0.392	0.2087	0.4462	0.0746	0.2753	0.2692	0.2029	0.3053	0.3672	0.1947	0.2087	0.2711	0.2015	0.30265	0.3086	0.2661	0.2214	0.1691
PIGV_1302_AD	0.7132	0.6684	0.8109	0.5072	0.5456	0.5627	0.3946	0.5785	0.3289	1	0.867	0.449	0.3752	0.4216	0.7097	0.733	0.643	0.3139	0.608066	0.7604	0.733	1	0.114	0.5884	0.6317	1	0.1026	0.6958	0.4855	1	0.7743	0.4855	0.3398	0.4617	0.2309	0.6668	0.6904	0.3946	1	1	0.6258	0.4738	0.6155	0.7978	0.4356	0.7554	0.7905	0.5174	0.8326
GMEB1_1390_AA	0.4685	0.404	0.414662	0.3476	0.3986	0.1422	0.3405	0.559	0.3833	0.414662	0.528	0.3091	0.0506	0.4272	0.4469	0.259	0.3737	0.189	0.414662	0.3321	0.2532	0.4825	0.414662	0.4986	0.2532	0.414662	0.414662	0.528	0.414662	0.414662	0.3737	0.3587	0.414662	0.3091	0.3321	0.3833	0.2865	0.4272	0.2621	0.4825	0.39	0.4531	0.5396	0.4454	0.6654	0.4272	0.2846	0.4923	0.6351
IQCC_1564_AD	0.1945	0.0726	0.6667	0.4225	0.2115	0.287	0.3492	0.4522	0.1901	0.439264	0.493	0.5278	0.3285	0.4913	0.3428	0.3982	0.3631	0.4259	0.2731	0.4046	0.507	0.5905	0.1608	0.3492	0.5658	0.3403	0.4721	0.5783	0.2511	0.3492	0.6375	0.427	0.2384	0.3492	0.3376	0.5825	0.8639	0.4046	0.1726	0.6168	0.4058	0.6466	0.5798	0.5778	0.9331	0.7109	0.7025	0.4619	0.7285
ZBTB8A_1609_AA	0.6515	0.5796	0.8827	0.721	0.7499	0.797	0.8076	0.7745	0.7378	0.5542	0.6008	0.8827	0.8035	0.9435	0.6601	0.8275	0.8172	0.6506	0.696	0.7465	0.6357	0.8635	0.9075	0.6716	0.4781	0.7598	0.7077	0.797	0.8154	1	0.7659	0.8035	0.8172	0.7745	0.8125	0.7193	0.6768	0.8275	0.8936	0.6008	0.6537	0.9515	0.9	0.9075	0.8997	0.7276	0.7138	0.7955	0.5668
S100PBP_1637_AA	0.4916	0.5919	0.6074	0.5371	0.7861	0.5274	0.7364	0.5265	0.6592	0.6592	0.6445	0.4716	0.7132	0.5371	0.4916	0.5966	0.4293	0.6592	0.6423	0.6302	0.78	0.6665	0.7437	0.7074	0.6803	0.6967	0.6286	0.6745	0.7524	0.7437	0.3559	0.6049	0.6171	0.4916	0.7014	0.5211	0.6171	0.5473	0.5845	0.6929	0.6374	0.5593	0.7206	0.5801	0.7946	0.5095	0.6137	0.7206	0.598
SMIM12_1701_AD	0.5627	0.7777	1	1	0.8766	1	0.7201	0.8544	0.8121	0.7118	0.8929	0.7477	1	1	0.9414	1	1	0.542	0.7554	0.9268	0.9195	0.8499	0.7181	0.7851	0.8832	0.5233	0.8811	0.8006	0.8256	1	0.5815	0.9153	1	0.938	0.8359	0.7942	1	0.5815	1	1	1	1	0.7424	0.7181	0.7554	1	0.9233	0.82	0.7671
C1orf109_1818_AA	0.293	0.4204	0	0.4129	0.293	0.4204	0.3259	0.1267	0.1142	0.24949	0.2165	0.24949	0.0808	0	0.2835	0.2214	0.24949	0.2545	0.24949	0.1947	0.3006	0.392	0.2661	0.2165	0.3006	0.24949	0.24949	0.3142	0.24949	0.2661	0.3259	0.1388	0.1495	0.4462	0.24949	0.2602	0.2249	0.0882	0.4916	0.24949	0.1535	0.1078	0.1621	0.1947	0.24949	0.1621	0.0746	0.3053	0.3006
INPP5B_1850_AA	0.3035	0.2075	0.4924	0.1567	0.1462	0.3134	0.2655	0.1585	0.1462	0.213809	0.3266	0.3285	0.1462	0.1598	0.2675	0.1978	0.2694	0.173	0.213809	0.1749	0.1356	0.1249	0.1107	0.2007	0.3343	0.0789	0.213809	0.2997	0.215	0.3393	0.4924	0.1609	0.1236	0.2551	0.222	0.0967	0.2551	0.3539	0.2551	0.2305	0.3461	0.1778	0.1804	0.2965	0.2551	0.345	0.2043	0.1804	0.0789
INPP5B_1852_AD	0.1436	0.1087	0.18	0.187	0.2731	0.1297	0.2586	0.3051	0.1767	0.296846	0.1827	0.3257	0.2435	0.0821	0.1297	0.201	0.309	0.1363	0.296846	0.2915	0.1262	0.4843	0.0821	0.556	0.6067	0.296846	0.296846	0.3492	0.296846	0.2511	0.0914	0.1244	0.1517	0.4959	0.2565	0.2511	0.3492	0.296846	0.7469	0.309	0.1031	0.2347	0.4959	0.1726	0.296846	0.18	0.3712	0.2115	0.4015
NDUFS5_1869_AD	0.2602	0.009	0.2486	0.4929	0.2485	0.5331	0.5149	0.5224	0.487	0.28	0.5011	0.531	0.5087	0.4982	0.5274	0.5467	0.4856	0.5185	0.2183	0.5236	0.5235	0.2849	0.4919	0.5325	0.2745	0.2286	0.5464	0.2226	0.4738	0.5519	0.5082	0.5069	0.5023	0.5386	0.2742	0.5153	0.5299	0.232	0.2071	0.5173	0.2438	0.1744	0.2638	0.0079	0.0044	0.2606	0.508	0.5325	0.2966
PABPC4_1896_AD	0.6828	0.8626	0.7828	0.8832	0.8843	0.7742	0.7654	0.7331	0.813027	1	0.7188	0.8682	0.7058	0.8466	0.6201	0.8044	0.8132	0.7372	0.771	0.8325	0.7996	0.9505	0.8443	0.8119	0.657	0.6919	0.8855	0.9128	0.7931	0.6921	0.8675	0.8181	0.7353	0.7118	0.734	0.9264	0.6888	0.6832	0.7884	0.9156	0.8554	0.8172	0.8799	0.847	0.8119	0.7341	0.5157	0.8192	0.7288
EXO5_2006_AD	1	1	1	1	1	1	1	0.6046	0.6908	0.949158	1	1	1	1	1	1	1	1	0.949158	0.8475	1	1	0.6042	1	1	1	0.949158	1	1	0.6545	1	1	1	0.8017	1	1	1	1	1	1	1	1	1	1	1	1	1	1	1
ZNF691_2131_AD	0.6542	0.8033	0.6798	0.544	0.65	0.7607	0.5328	0.5241	0.6418	0.6295	0.8446	0.709	0.7026	0.8514	0.5373	0.6354	0.6674	0.6871	1	0.6604	0.6717	0.4292	0.3535	0.7427	0.747	0.5458	0.668141	0.7809	0.2948	0.5006	0.8881	0.7058	0.6125	0.7115	0.6127	0.5505	0.6571	0.8021	0.6786	0.7544	0.5288	0.7124	0.89	0.779	0.8415	0.7267	0.6255	0.6214	0.5653
TMEM125_2153_AA	0.4685	0.6004	0.7977	0.7937	0.6917	0.6579	0.3036	0.6715	0.7177	0.3997	0.5316	0.5694	0.5005	0.6004	0.8065	0.5103	0.5906	0.7028	0.346	0.6839	0.9171	0.8204	0.5288	0.7937	0.4903	0.34	0.7063	0.3073	0.6688	0.3754	0.6004	0.4537	0.5674	0.5459	0.476	0.6682	0.6579	0.5529	0.5948	0.6688	0.6522	0.5754	0.8621	0.6205	0.611898	0.5459	0.6839	0.5619	0.6671
DPH2_2500_AA	0.0692	0.062	0.2128	0.072	0.1654	0.0303	0.0902	0.1369	0.0437	0.1654	0.1558	0.3273	0.1581	0.1427	0.1905	0.1385	0.1207	0.1697	0.1063	0.169	0.1823	0.1921	0.0838	0.1823	0.2709	0.1654	0.1063	0.0819	0.0338	0.1735	0.1967	0.1063	0.1861	0.0735	0.1581	0.2794	0.1567	0.1452	0.0407	0.3458	0.2375	0.2536	0.1861	0.2408	0.4977	0.2575	0.3019	0.1227	0.0492
B4GALT2_2517_AD	1	1	1	1	0.960625	1	1	1	1	1	1	1	1	1	1	1	1	1	0.960625	1	1	1	1	1	1	1	1	1	0.960625	0.6443	1	1	1	0.6822	1	0.8767	1	1	1	1	1	1	1	0.7703	1	1	1	1	0.6168
CCDC24_2532_AA	0.3238	0.6813	0.6117	0.3148	0.6682	0.428	0.4161	0.4338	0.3501	0.7822	0.5131	0.6207	0.5116	0.5491	0.7054	0.45	0.7364	0.4014	0.5449	0.5859	0.5559	0.5116	0.4475	0.4576	0.5664	0.5583	0.5896	0.6702	0.308	0.4822	0.5449	0.7496	0.4731	0.5307	0.3328	0.5632	0.6852	0.4225	0.5032	0.5207	0.463	0.6336	0.5583	0.5887	0.7604	0.7533	0.5753	0.6769	0.4931
MUTYH_2670_AA	0.4997	0.4514	0.7674	0.5674	0.564563	0.5178	0.7444	0.6715	0.7634	0.564563	0.3675	0.3723	0.564563	0.7836	0.5626	0.1658	0.569	0	0.7942	0.3464	0.564563	0.3088	0.6701	0.564563	0.7962	0.386	0.564563	0.2987	0.8655	0.8704	0.5607	0.6814	0.8555	0.3438	0.7952	0.3991	0.564563	0.3599	0.4878	0.6455	0.5906	0.6503	0.4919	0.4597	0.4897	0.3163	0.4665	0.564563	0.5879
MUTYH_2671_AA	0.9027	0.8016	0.8642	0.914	0.8114	0.7698	0.89	0.8749	0.8892	1	0.7837	0.8365	0.81	0.8976	0.7843	0.8721	0.8341	0.7285	0.842	0.8154	0.8978	0.6813	0.8634	0.8464	0.9544	0.533	0.7532	0.6393	0.9621	0.933	0.7112	0.8514	0.9652	0.6661	0.9039	0.6476	0.7975	0.7766	0.798	0.898	0.873	0.821	0.6668	0.8953	0.6993	0.691	0.7	0.9532	0.8773
MUTYH_2673_AA	0.0332	0.1717	0.1829	0.2027	0.0904	0.174609	0.3125	0.0817	0.2806	0.174609	0.0198	0.3176	0.2143	0.1217	0.1029	0.1951	0.032	0.3889	0.1538	0	0.12	0.2215	0.1624	0.2284	0.099	0.4832	0.2936	0.1975	0.1868	0.127	0.3349	0.0673	0.0748	0	0.1549	0.2143	0.2667	0.0973	0.2143	0	0.2019	0.3302	0.2005	0	0.3978	0.3307	0.2205	0.2345	0.1671
MUTYH_2674_AA	0.097	0.1691	0.3424	0.1103	0.0606	0.2438	0.2661	0.2266	0.2872	0.213588	0.1388	0.104	0.1078	0.293	0.2618	0.0285	0.2087	0	0.4204	0.1078	0.1535	0.1737	0.2438	0	0.1577	0.3559	0.213588	0.1947	0.2029	0.3259	0.3424	0.2724	0.1769	0.2087	0.293	0.2661	0	0.1388	0.1947	0.1717	0.1737	0.2894	0.3259	0.0909	0.293	0.1717	0.2733	0.1388	0.1667
MKNK1_2815_AD	0.679	0.2697	0.6701	0.6286	0.3757	0.4744	0.3672	0.6875	0.7032	0.3215	0.5199	0.4482	0.4916	0.7174	0.2888	0.6037	0.5199	0.7218	0.5038	0.6701	0.4545	0.4944	0.5038	0.539	0.5181	0.7719	0.7647	0.5423	0.7201	0.4231	0.7421	0.4916	0.6286	0.6286	0.619	0.5752	0.6286	0.4037	0.5844	0.7303	0.535	0.4362	0.6037	0.4944	0.7529	0.7032	0.619	0.6286	0.7529
CYP4B1_2837_AA	0.934481	1	1	1	1	1	1	0.9837	0.934481	0.934481	0.934481	0.9642	1	0.9677	0.934481	0.9542	1	0.8413	1	1	1	0.8667	1	1	0.934481	0.9729	1	0.8809	0.934481	0.934481	1	1	0.934481	0.9063	1	0.9489	1	1	0.7778	1	0.7423	1	1	0.9748	0.9901	0.934481	0.7889	1	0.7825
ZCCHC11_3009_AA	0.4037	0.6701	0.6592	0.6898	0.392	0.6351	0.6423	0.5282	0.6007	0.7719	0.6322	0.456	0.5801	0.6394	0.6207	0.6423	0.7206	0.7206	0.637883	0.6171	0.6592	0.5856	0.6286	0.7538	0.5752	0.7267	0.8713	0.4462	0.637883	0.4916	0.4362	0.6423	0.6111	0.5632	0.4916	0.4329	0.7437	0.7514	0.853	0.6171	0.7822	0.6929	0.6374	0.7027	0.6803	0.7683	0.6111	0.5919	0.5919
ECHDC2_3029_AD	0.4936	0.3226	0.3904	0.2159	0.292	0.291494	0.3395	0.2946	0.2267	0.1417	0.1822	0.3361	0.291494	0.2678	0.2918	0.1659	0.4218	0.2664	0.291494	0.2716	0.3939	0.272	0.2883	0.4297	0.291494	0.46	0.343	0.329	0.1085	0.291494	0.1759	0.2742	0.2178	0.3339	0.2298	0.3828	0.1589	0.3885	0.5873	0.3245	0.2571	0.3124	0.1136	0.3953	0.291494	0.3394	0.1592	0.2946	0.1822
ATG4C_3257_AD	0.3929	0.6777	0.2444	0.5016	1	0.4371	0.3615	0.5641	0.3117	0.2171	0.4158	0.6743	0.4302	0.7444	0.4803	0.535	0.7639	0.672	0.5108	0.6801	0.66	0.4753	0.3615	0.3568	0.7639	0.8381	0.5108	0.3651	0.5108	0.4925	0.4371	0.3929	0.4251	0.5641	0.3568	0.4925	0.6016	0.4371	0.8038	0.5108	0.5641	0.6777	0.4803	0.4753	0.5108	0.6372	0.4541	0.5761	0.6331
SRSF11_3383_AA	0.8189	0.63668	0.2705	0.9354	0.63668	0.4863	0.7598	0.7352	0.7547	0.63668	0.6901	0.4354	0.5792	0.794	0.8048	0.6157	0.6263	0.6282	0.63668	0.5036	0.5726	0.8305	0.63668	0.9124	0.4101	0.9326	0.63668	0.8274	1	0.7295	0.4327	0.6013	0.7136	0.7272	0.7842	0.7346	0.6912	0.7781	0.7454	0.8478	0.4989	0.5641	0.7467	0.5754	0.3972	0.5999	0.7033	0.6047	0.8679
GBP3_3709_AD	0.3063	0.149	0.3121	0.1843	0.0807	0.1833	0.5098	0.1426	0.775	0.320636	0.2554	0.311	0.4198	0.3812	0.5763	0.1468	0.3136	0.1475	0.5543	0.1873	0.1923	0.3404	0.4944	0.1463	0.6268	0.2548	0.225	0.3297	0.4335	0.1974	0.2007	0.4953	0.2011	0.1719	0.1934	0.3943	0.2896	0.3033	0.1963	0.3372	0.1186	0.3827	0.1951	0.1645	0.7132	0.1908	0.264	0.175	0.2237
SLC44A3_3819_AA	0.6837	0.7946	0.7074	0.7769	0.5752	0.3259	0.6851	0.6322	0.8286	0.9018	0.6171	0.9263	0.6851	0.7668	0.712142	0.62	0.712142	0.6979	0.8417	0.8097	0.6237	0.5801	0.6745	0.6333	0.6989	0.5473	0.7303	0.6762	0.9018	0.8131	0.6237	0.7154	0.6394	0.6237	0.6957	0.6727	0.6701	0.6171	0.5919	0.7027	0.7586	0.5417	0.8131	0.8393	0.5473	0.7303	0.7437	0.8131	0.7719
PTBP2_3831_AA	0.3453	0.5494	0.4781	0.334	0.4293	0.2872	0.4805	0.3767	0.2985	0.4085	0.4916	0.311	0.6885	0.5051	0.5282	0.5322	0.4362	0.4916	0.460981	0.5473	0.5473	0.5919	0.3672	0.3373	0.3495	0.5211	0.1214	0.6022	0.460981	0.460981	0.3636	0.4773	0.5632	0.392	0.6592	0.5371	0.4916	0.2894	0.757	0.4744	0.5401	0.5351	0.3607	0.5884	0.3745	0.392	0.3259	0.2835	0.6237
PTBP2_3833_AA	0	0.3083	0.2107	0.1345	0.268	0.244464	0.2082	0.1459	0.2217	0.244464	0.0575	0.176	0.0965	0.1136	0.2752	0.14	0.1088	0.1856	0.244464	0.259	0.189	0.5062	0	0.5325	0.244464	0.3481	0.244464	0.4792	0.244464	0.244464	0.244464	0.1647	0.2547	0.0867	0.176	0.171	0.3522	0.3629	0.2107	0.244464	0.3326	0.1294	0.3629	0.1023	0.244464	0.3114	0.4254	0.3281	0.189
RNPC3_3907_AA	0.4834	0.8447	0.8467	0.4878	0.8598	0.5708	0.7477	0.7606	0.6019	0.3571	0.6932	0.7188	0.7197	0.8418	0.7766	0.7219	0.7597	0.7564	0.4487	0.8107	0.5655	0.7716	0.2953	0.5659	0.6351	0.5203	0.2845	0.8853	0.2698	0.5532	0.8401	0.8199	0.7149	0.7369	0.6313	0.7952	0.9062	0.7339	0.3515	0.8475	0.8004	0.8124	0.8549	0.8363	0.6653	0.9052	0.9089	0.6854	0.7156
CYB561D1_4028_AD	1	0.6042	0.6913	0.778	0.9087	1	1	0.7883	0.6418	0.5822	1	0.884461	1	0.919	1	1	0.7491	1	0.884461	0.9098	1	0.6729	1	0.8613	0.9119	1	0.884461	0.7993	0.884461	0.884461	0.7533	1	1	1	0.884461	0.9141	1	1	0.9177	0.884461	0.7674	0.6087	0.8884	0.879	0.884461	1	0.884461	0.9363	1
KCNC4_4098_AA	0.8857	0.7366	0.8398	0.8783	0.6368	0.751	0.9524	0.7112	0.8055	0.5798	0.7887	0.8094	0.6606	0.7616	0.922	0.9237	0.8049	0.9125	0.8821	0.898	0.6344	0.5895	0.7242	0.6888	0.925	0.8921	0.367	0.7241	0.8643	0.4199	0.7076	0.7835	0.6701	0.8559	0.6175	0.8218	0.7362	0.7481	0.8071	0.8539	0.734	0.8615	0.7796	0.778	0.7675	0.8011	0.7629	0.427	0.9338
DRAM2_4136_AD	0.9746	0.5231	1	0.5017	0.5023	0.0707	1	0.4745	0.6597	0.0633	1	0.4322	1	1	1	1	0.3958	1	1	1	1	0.9739	0.4765	1	1	1	0.9643	1	1	1	1	0.0658	1	0.5325	1	0.971	0.5722	0.5607	1	1	1	0.5973	1	0.0886	0.5628	0.9412	1	0.0961	1
DRAM2_4137_AD	1	0.897	0.945	1	1	1	1	0.8918	0.9615	1	1	0.8896	1	0.9758	0.9676	1	0.9373	1	1	1	1	1	1	1	1	1	1	1	1	1	1	0.6494	1	1	1	1	1	1	1	1	0.9842	1	1	0.5033	1	1	1	0.7126	1
C1orf162_4170_AA	0.3716	0.2358	0.6183	0.2793	0.3506	0.2206	0.3618	0.2576	0.4635	0.2126	0.3895	0.3391	0.1857	0.3992	0.3864	0.1816	0.2313	0.288226	0.2528	0.2835	0.2976	0.4305	0.3243	0.3584	0.2893	0.1585	0.2523	0.288226	0.3198	0.2055	0.4475	0.1127	0.3599	0.3658	0.294	0.7908	0.3064	0.2275	0.2197	0.2421	0.369	0.2743	0.2783	0.2774	0.4097	0.3506	0.3193	0.1684	0.2236
MOV10_4226_AA	0.3097	0.1638	0.0626	0.5593	0.4779	0.4825	0.35	0.2227	0.4583	0.329545	0.48	0.4204	0.4254	0.6638	0.1947	0.3868	0.2401	0.4316	0.329545	0.3367	0.3564	0.4756	0.4254	0.2809	0.329545	0.1535	0.329545	0.4433	0.329545	0.4583	0.0714	0.3969	0.2973	0.2401	0.2809	0.4283	0.1913	0.3477	0.311	0.3906	0.3448	0.2653	0.2309	0.3545	0.329545	0.3477	0.4028	0.4204	0.35
RHOC_4235_AA	0.2879	0.3322	0.4294	0.5416	0.4416	0.4278	0.3016	0.3827	0.5446	0.3939	0.6008	0.3769	0.1959	0.5197	0.7851	0.4346	0.2129	0.2859	0.0715	0.4456	0.217	0.3627	0.2828	0.263	0.3777	0.2641	0.184	0.5008	0.2097	0.2872	0.5271	0.5061	0.2274	0.5267	0.2925	0.5011	0.469	0.2842	0.1095	0.5278	0.3084	0.5978	0.4866	0.449	0.3842	0.4834	0.5287	0.4152	0.3081
NBPF11_7329_AA	0.3492	0.5729	0.2709	0.2824	0.3735	0.381949	0.5176	0.4549	0.4549	0.381949	0.1387	0.4459	0.3961	0.5729	0.5176	0.34	0.3036	0.5376	0.381949	0.2611	0.315	0.4913	0.381949	0.506	0.1517	0.381949	0.6168	0.7117	0.381949	0.2242	0.1767	0.4991	0.3229	0.5886	0.4991	0.2115	0.6993	0.1892	0.4991	0.6168	0.3279	0.5646	0.4938	0.4643	0.381949	0.4561	0.2551	0.1675	0.4913
C1orf51_7459_AA	0.182569	0.1875	0.1079	0	0.0418	0.0634	0.0818	0.0296	0.182569	0.1707	0	0	0.182569	0.1888	0.1053	0.198	0.182569	0.0656	0	0	0.182569	0.1152	0	0.114	0.1503	0.1422	0.1688	0.337	0.114	0	0.0625	0.1406	0	0	0.349	0.5166	0.128	0.2047	0	0	0.1668	0	0	0.2063	0.2966	0.1885	0	0.1762	0.1866
BNIPL_7553_AA	0.423109	0.1774	0.4371	0.308	0.3622	0.2444	0.2056	0.4649	0.3014	0.1146	0.423109	0.4504	0.4674	0.3726	0.4022	0.3056	0.3717	0.2444	0.423109	0.5397	0.2497	0.4858	0.0689	0.4816	0.4753	0.0794	0.4452	0.6083	0.179	0.423109	0.6996	0.5189	0.4554	0.5672	0.5741	0.5737	0.6996	0.3628	0.1816	0.5087	0.6743	0.5777	0.7775	0.5062	0.8999	0.7491	0.632	0.2566	0.2928
SEMA6C_7562_AD	0.4847	0.1168	0.5525	0.2272	1	0.440956	0.3199	0.1638	0.2358	0.440956	0.1499	0.3817	0.1904	0.7016	0.313	0.2443	0.1904	0.3872	0.440956	0.3998	0.3927	0.6438	0.1583	0.2201	0.1499	0.440956	1	0.5611	0.0555	1	0.7461	0.5276	0.1604	0.2272	0.5141	0.4406	0.4784	0.4847	0.2272	0.757	1	0.3975	0.397	0.6908	0.7535	0.3528	0.5169	0.3927	0.440956
SNX27_7646_AA	0.6231	0.4925	0.5573	0.6056	0.4888	0.5514	0.478	0.4907	0.749	0.7402	0.5565	0.7402	0.5001	0.344	0.6062	0.5281	0.5578	0.4159	0.498338	0.5679	0.5105	0.4459	0.3981	0.4703	0.3918	0.498338	0.1863	0.5281	0.1128	0.8207	0.6677	0.3569	0.637	0.6009	0.3629	0.617	0.5392	0.3887	0.4509	0.6081	0.5152	0.596	0.6837	0.4368	0.4159	0.6539	0.5012	0.4519	0.4907
TDRKH_7670_AD	0.643559	0.8237	0.643559	0.6866	0.6512	0.5779	0.7957	0.5848	0.467	0.643559	0.5216	0.643559	0.6304	0.6576	0.5388	0.6231	0.675	0.4378	0.643559	0.5953	0.4378	0.4984	0.643559	0.7957	0.5881	0.5967	0.7724	0.6314	0.643559	0.609	0.6279	0.8187	0.5216	0.4933	0.609	0.768	0.6541	0.5889	0.6181	0.643559	0.5572	0.9334	0.6817	0.6265	0.643559	0.643559	0.5881	0.6919	0.7388
CHTOP_7748_AD	0.5966	0.7319	0.879	0.8792	1	0.861	0.8086	0.9703	0.9162	0.9005	0.7621	0.9543	0.8373	0.875	0.8164	0.7499	0.6349	0.9004	0.5341	0.9647	0.6393	0.6661	0.8895	0.8533	0.6008	0.332	0.649	0.8435	0.2886	0.6975	0.8519	0.8771	0.8801	0.9593	0.5601	0.791	0.8991	0.7406	0.6666	0.861	0.7805	0.915	0.7833	0.7949	0.9227	0.8007	0.8738	0.935	1
ADAM15_7894_AD	0.1708	0.1511	0.1657	0.1522	0.1192	0.0958	0.1958	0.0978	0.142	0.0856	0.1794	0.1809	0.0974	0.1643	0.5521	0.1138	0.1375	0.2032	0.4833	0.5794	0.227	0.041	0.1116	0.0714	0.3908	0.3075	0.1944	0.3955	0.1127	0.2439	0.2859	0.3621	0.2389	0.1617	0.1646	0.2616	0.3086	0.1175	0.1188	0.2289	0.2167	0.2463	0.2156	0.3213	0.3318	0.4358	0.2249	0.1495	0.1422
MUC1_8021_AA	0.7928	0.7537	0.3894	0.0249	0.4809	0.5328	1	0.0697	0.5605	0.468713	0.5725	0.4595	0.0387	0.2344	0.468713	0.0368	1	0.1501	0.1794	1	0.5112	0.0315	0.468713	0.6048	1	1	1	1	0.9414	0.0431	0.468713	0.3731	1	0.5706	0.0384	0.5605	0.9937	0.0309	0.1422	0.461	0.048	0.0945	0.4118	0.9745	0.468713	0.641	0.5591	0.6092	0.0485
THBS3_8029_AA	0.2588	0.1923	0.4295	0.0968	0.3438	0.0948	0.2184	0.3679	0.0615	0.284505	0.2723	0.4112	0.2466	0.2985	0.3129	0.2626	0.3177	0.1236	0.284505	0.2643	0.1302	0.3674	0.1358	0.1236	0.386	0.0418	0.3793	0.4762	0.1541	0.234	0.4661	0.3272	0.2978	0.3338	0.2418	0.3014	0.5116	0.3595	0.1629	0.4899	0.2973	0.3993	0.2895	0.4074	0.3656	0.3024	0.2141	0.2588	0.1978
RUSC1_8082_AD	0.5876	1	0.5988	0.5019	0.7967	0.7775	0.7095	0.7417	0.6825	0.620363	0.6281	0.620363	0.6208	0.5219	0.4847	0.6147	0.6488	0.6604	1	0.6105	0.7311	0.6334	0.6539	0.4963	0.841	0.7248	0.8344	0.8113	0.2235	0.6208	0.5282	0.6973	0.4343	0.5019	0.5811	0.7839	0.5709	0.8372	0.6153	0.620363	0.437	0.6615	0.4322	0.4394	0.620363	0.6529	0.7514	0.6738	0.7946
HDGF_8323_AD	0.3868	0.1554	0.1737	0.2015	0.296	0.1362	0.3106	0.1866	0.0182	0.2828	0.1362	0.197	0.1362	0.2163	0.1069	0.5578	0.4151	0.1737	0.29025	0.1737	0.112	0.269	0.2015	0.1478	0.2782	0.0827	0.29025	0.5578	0.2051	1	0.1491	0.3212	0.1913	0.3446	0.219	0.3034	0.4189	0.1809	0.2265	0.2398	0.3664	0.3277	0.3314	0.3868	1	0.4506	0.3694	0.2595	0.3446
DCAF8_8453_AD	0.6858	0.7224	0.4898	0.6633	0.591	0.6171	0.5777	0.604	0.5581	0.5868	0.5545	0.6217	0.7371	0.6061	0.7236	0.7795	0.3965	0.6187	0.681467	0.5454	0.7395	0.7704	0.82	0.654	0.4465	0.7117	0.4912	0.6519	0.7795	0.7099	0.7703	0.7759	0.7186	0.5903	0.8192	0.7151	0.5134	0.7812	0.5705	0.7127	0.6154	0.7099	0.6842	0.794	0.5701	0.6294	0.6343	0.6595	0.6536
HSD17B7_8758_AA	0.8073	0.8995	0.644	0.896	0.6563	0.8438	0.8808	0.8272	0.88	0.9467	0.8606	0.7765	0.8465	0.7267	0.9617	0.7725	0.9305	0.952	0.6798	0.7816	0.9104	0.5926	0.8094	0.7584	0.7978	0.7273	0.8438	0.6011	0.918	1	0.7711	0.8251	0.8555	0.7725	0.7857	0.6557	0.8338	0.8081	0.8425	0.7584	0.9153	0.8902	0.7143	0.7905	0.6069	0.7685	0.7495	0.88	0.7844
TOR1AIP1_9127_AA	0	0.405	0.4653	0.4408	0.5349	0.5527	0	0.9318	0.4117	0	0.9343	0	0.4154	0.3842	0	0	0.9852	0.4405	0.3259	0.9584	0.8737	0.5998	0.8889	0.3086	0.4981	0.392	0	0.4304	0.2872	0	0	0.4026	0	0	0.4344	0	0	0.9263	0	0	0.4653	0	0	0	0.312417	0	0	0.9531	0.0069
GLUL_9148_AD	0.0913	0.1249	0.3605	0.0417	0.2181	0.276	0.2363	0.107	0.1828	0.1114	0.107	0.4375	0.0851	0.1693	0.5299	0.1762	0.2441	0.541	0.271264	0.3917	0.3467	0.2585	0.073	0.1628	0.167	0.1222	0.1107	0.4321	0.1103	0.4482	0.1465	0.2724	0.2553	0.4047	0.354	0.5286	0.6519	0.1868	0.142	0.383	0.3755	0.334	0.323	0.2588	0.5466	0.4004	0.1199	0.373	0.2734
ADORA1_9441_AA	0.1562	0.337	0.2836	0.1983	0.2757	0.4478	0.2769	0.2438	0.1862	0.273	0.2786	0.2529	0.3274	0.2765	0.474	0.2133	0.5457	0.3603	0.091	0.2162	0.2508	0.3416	0.1711	0.2955	0.2968	0.222	0.1954	0.3007	0.3592	0.091	0.3464	0.2564	0.2968	0.2133	0.423	0.2685	0.2666	0.3365	0.339	0.2516	0.2968	0.223	0.2552	0.2198	0.273	0.2575	0.3481	0.342	0.2665
ZC3H11A_9461_AD	0.6061	0.7646	0.6569	0.6608	0.5424	0.249	0.6296	0.7907	0.5694	0.572308	0.7848	0.6951	0.6459	0.5997	0.6532	0.7112	0.457	0.6079	0.572308	0.6608	0.5327	0.6951	0.572308	0.702	0.2995	0.477	0.572308	0.7239	0.572308	0.4062	0.6459	0.5657	0.2673	0.5155	0.572308	0.5487	0.6061	0.7525	0.6032	0.572308	0.5327	0.7428	0.7053	0.4348	0.572308	0.6032	0.5857	0.6319	0.6361
CDK18_9557_AD	0.3411	0.4084	0.3579	0.2699	0.3651	0.2891	0.2141	0.237	0.4202	0.237	0.1602	0.2699	0.2566	0.3411	0.5169	0.4251	0.361958	0.5829	0.361958	0.3875	0.5641	0.287	0.4632	0.3246	0.187	0.4486	0.1288	0.4175	0.3832	0.2478	0.3972	0.3568	0.2566	0.2202	0.2975	0.5966	0.2283	0.3717	0.2566	0.2234	0.166	0.5087	0.3593	0.3276	0.4753	0.5087	0.32	0.2163	0.2928
ATF3_9737_AA	0.2135	0.459	0.197477	0.2785	0.1137	0.053	0.3211	0.1079	0.3548	0.197477	0.3586	0.2157	0.4461	0.5226	0.5188	0.1678	0.3581	0.494	0.0683	0.2205	0.3038	0.3418	0.3548	0.2851	0.1082	0.2156	0.0068	0.4382	0.1444	0.0295	0.3812	0.447	0.1923	0.0668	0.0756	0.3216	0.5739	0.3123	0.2234	0.3933	0.288	0.5089	0.1696	0.1298	0.6888	0.499	0.5589	0.2074	0.2775
TATDN3_9754_AA	0.323	0.323	0.3771	0.157	0.4022	0.2517	0.6622	0.3157	0.2203	0.303	0.5637	0.2982	0.3857	0.3202	0.1679	0.1333	0.283149	0.1475	0.3263	0.5023	0.0917	0.1805	0.5856	0.4253	0.3319	0.2876	0.0429	0.4178	0.1874	0.1805	0.1596	0.1453	0.0684	0.3263	0.3658	0.3057	0.0684	0.3394	0.4326	0.6828	0.3658	0.2517	0.5477	0.3263	0.3699	0.195	0.3096	0.0972	0.3431
TATDN3_9755_AA	0.4218	0.4598	0.7021	0.3204	0.5288	0.3039	0.5974	0.4204	0.3548	0.3793	0.7586	0.3438	0.4074	0.4783	0.2661	0.3099	0.366828	0.1218	0.366828	0.3957	0.366828	0.1701	0.6111	0.3993	0.3099	0.3333	0.0615	0.2486	0.366828	0.1642	0.2821	0.1833	0.0894	0.4853	0.6111	0.4853	0.366828	0.4783	0.69	0.386	0.3767	0.3039	0.44	0.3913	0.44	0.1642	0.366828	0.366828	0.5193
TATDN3_9756_AA	0.6031	0.6394	0.7946	0.7154	0.6237	0.5632	0.4293	0.6097	0.6592	0.5828	0.7074	0.5505	0.5211	0.6592	0.641	0.7437	0.594553	0.4433	0.5473	0.392	0.7946	0.4805	0.525	0.4716	0.4731	0.5517	0.5919	0.3142	0.7719	0.4699	0.6727	0.5675	0.5708	0.6592	0.7303	0.6803	0.6394	0.6394	0.7437	0.2249	0.5101	0.5632	0.392	0.5687	0.5708	0.4462	0.8131	0.7838	0.6727
CNIH4_9956_AA	1	0.91096	0.91096	1	1	1	1	1	1	1	1	1	0.5067	1	1	1	1	1	1	0.7325	1	1	1	1	1	1	1	0.2186	1	1	0.1791	1	1	1	0.4199	1	1	1	1	1	1	0.6037	1	1	1	1	1	1	1
MRPL55_10084_AD	0.0874	0.053	0.2815	0.3643	0.1789	0.27	0.1855	0.2247	0.1998	0	0.5268	0.1041	0.4411	0.1584	0.1326	0.5314	0.2326	0.1341	0.2581	0.1809	0.8505	0.2306	0.1789	0.2468	0.169	0.2188	0.1298	0.3213	0.1438	0.1814	0.0868	0.2014	0.2877	0.2632	0.1725	0.2176	0.1792	0.2276	0.2084	0.1463	0.3767	0.4764	0.3932	0.1541	0.293	0.3916	0.1546	0.2044	0.1333
MRPL55_10094_AD	0.0707	0.1647	0.1112	0.4156	0.2391	0.2322	0.3156	0.367	0.1928	0.1732	0.2766	0.2429	0.2931	0.2573	0.1827	0.3882	0.1811	0.2436	0.2549	0.3912	0.4867	0.3121	0.2418	0.1527	0.3598	0.2433	0.1124	0.4647	0.143	0.3569	0.2205	0.1622	0.3501	0.177	0.2644	0.2176	0.3711	0.2321	0.1492	0.3081	0.3287	0.3457	0.3524	0.3022	0.5601	0.4025	0.3257	0.2128	0.3083
MRPL55_10106_AA	0.058	0.0572	0.1957	0.0823	0.1681	0.0782	0.0362	0.1124	0.1963	0.0568	0.0468	0.0937	0.1345	0.1677	0.1984	0.0291	0.0938	0.1418	0.0462	0.4382	0.0027	0.331	0.0433	0.3529	0.3486	0.0324	0.112	0.0969	0.0237	0.0551	0.3153	0.1271	0.1429	0.2793	0.2879	0.1506	0.3645	0.0821	0.0789	0.2137	0.0382	0.2166	0.4829	0.2819	0.142	0.4385	0.2777	0.193	0.0817
MRPL55_10129_AA	0.0574	0.0487	0.1492	0.0736	0.1658	0.1198	0.0308	0.1277	0.1205	0.0262	0.1063	0.0847	0.1644	0.1177	0.2503	0.0358	0.1312	0.0954	0.0536	0.6849	0.0034	0.3019	0.0429	0.36	0.1267	0.0343	0.1097	0.0978	0.025	0.0921	0.4481	0.1526	0.2062	0.321	0.4561	0.1655	0.3622	0.0996	0.0477	0.2743	0.0601	0.198	0.4967	0.2766	0.1458	0.4466	0.5157	0.1097	0.0587
TTC13_10257_AA	0.756861	0.8286	0.7719	0.6851	0.756861	0.8286	0.7267	0.8376	0.6171	0.756861	0.756861	0.8212	0.5473	0.7946	0.9355	0.9175	0.5632	0.8286	0.756861	0.7014	0.8186	0.7132	0.756861	0.6171	0.7538	0.8417	0.756861	0.4916	0.756861	0.6394	0.6592	0.7632	0.7946	0.9063	0.8627	0.8915	0.8286	0.7558	0.6967	0.9063	0.6171	0.8969	0.8457	0.9355	0.6592	0.6712	0.8764	0.8713	0.756861
C1orf131_10273_AA	0.6445	0.8073	0.8186	0.5663	0.7014	0.7154	0.8915	0.6503	0.5687	0.8855	0.8073	0.6592	0.853	0.9103	0.78	0.6515	0.4129	0.7904	0.5919	0.6701	0.6885	0.7755	0.5134	0.6074	0.6351	0.7437	0.8417	0.7524	0.6445	0.78	0.7119	0.5584	0.7241	0.5919	0.6031	0.9484	0.9263	0.5801	0.6944	0.6885	0.7241	0.7141	0.9141	0.8326	0.8713	0.853	0.6898	0.7267	0.6074
CEP170_10451_AD	0.3516	0.2784	0.4002	0.3681	0.4421	0.2025	0.3321	0.5042	0.6116	0.4272	0.4461	0.1991	0.4562	0.2776	0.4692	0.3224	0.2298	0.4707	0.409354	0.3055	0.3852	0.3211	0.5986	0.4272	0.1866	0.2988	0.409354	0.4272	0.409354	0.2229	0.4441	0.3562	0.3042	0.4029	0.4405	0.4617	0.342	0.3949	0.2449	0.4986	0.2716	0.2929	0.3862	0.4272	0.829	0.4115	0.4653	0.3042	0.3848
CEP170_10452_AD	1	0.6858	0.8293	0.7371	0.6987	0.6503	0.7084	0.7228	0.7611	1	0.7531	0.5036	0.7175	0.9411	0.7701	0.6705	0.567	0.7539	0.727494	0.778	0.8223	0.8022	0.9222	0.7285	0.5082	0.313	0.727494	0.4545	0.727494	0.8314	0.7931	0.7726	0.7605	0.7565	0.8305	0.8289	0.7515	0.824	0.5511	0.8514	0.6835	0.8237	0.8034	0.7779	0.7795	0.7708	0.8542	0.6787	0.5884
ZNF692_10562_AA	1	0.9012	0.8407	0.8719	1	0.8342	0.9431	0.9696	1	0.8186	0.6434	1	0.868157	0.5067	0.9486	0.8884	0.868157	0.8037	0.8389	0.7679	0.8809	0.9256	1	0.8992	0.8581	0.7512	1	0.8931	0.8003	1	0.8015	0.8958	1	0.7591	0.8364	0.7594	0.9161	0.8714	0.9228	0.8264	0.8494	0.8031	0.9184	1	0.9025	0.832	0.5675	1	1
ZNF692_10567_AA	0.5995	0.7179	0.6582	0.3207	0.4261	0.1953	0.4662	0.5632	0.8732	0.2729	0.4334	0.8505	0.5885	0.5937	0.7608	0.5753	0.6605	0.6907	1	0.7723	0.5995	0.6131	0.501139	0.6769	0.7047	0.6547	0.501139	0.5896	0.4376	0.422	0.501139	0.4687	0.636	0.7539	0.4064	0.3289	0.5643	0.4049	0.4561	0	0.6336	0.7461	0.6845	0.6423	0.737	0.7971	0.771	0.5739	0.0824
PGBD2_10573_AA	0.7904	0.8007	0.6997	0.7481	0.7288	0.8528	0.6268	0.8406	0.6064	1	0.6242	0.8285	0.7649	0.5816	0.5896	0.8446	0.7142	0.8488	0.6188	0.8879	0.8474	0.8679	0.7156	0.5478	0.8422	0.8423	0.8771	0.7573	0.4314	1	0.7788	0.6301	0.531	0.7959	0.6216	0.8865	0.8968	0.6535	0.6406	0.6015	0.7866	0.5641	0.6615	0.847	0.8588	0.8356	0.4163	0.75	0.7234
RPP38_10862_AD	0.3336	0.2548	0.415	0.4576	0.2491	0.4907	0.3512	0.2571	0.3191	0.1832	0.4784	0.3004	0.2375	0.2685	0.336	0.2471	0.0664	0.4257	0.2288	0.2416	0.2616	0.2087	0.3034	0.2309	0.3757	0.2693	0.1296	0.577	0.2669	0.138	0.1585	0.3095	0.5185	0.1687	0.3724	0.3688	0.4437	0.4228	0.1807	0.3851	0.3521	0.302	0.5075	0.2834	0.3064	0.3724	0.2144	0.2834	0.3152
RSU1_10878_AD	0.5317	0.5773	0.2838	0.5436	0.2616	0.6592	0.2126	0.6839	0.6295	0.8224	0.553	0.6011	0.4784	0.6099	0.5826	0.6092	0.0233	0.6721	0.46609	0.5272	0.6625	0.5876	0.3022	0.7522	0.6013	0.46609	0.2241	0.08	0.2896	0.6094	0.5984	0.5578	0.3592	0.6852	0.2727	0.1121	0.0813	0.547	0.5868	0.6398	0.46609	0.1716	0.308	0.351	0.7159	0.1261	0.4976	0.4718	0.6467
THNSL1_11022_AD	0.3881	0.3654	0.5432	0.3569	0.2896	0.2536	0.1569	0.4073	0.266	0.369235	0.2264	0.3729	0.2408	0.4164	0.588	0.3881	0.2972	0.3223	0.369235	0.517	0.369235	0.1921	0.3223	0.369235	0.369235	0.369235	0.369235	0.3084	0.369235	0.369235	0.526	0.3997	0.3223	0.369235	0.369235	0.4422	0.588	0.3881	0.2024	0.369235	0.4278	0.3223	0.5592	0.601	0.369235	0.8608	0.7811	0.4613	0.5114
YME1L1_11061_AA	0.0248	0.0197	0.0364	0.0215	0.0321	0.0145	0.0136	0.0278	0.0123	0.0481	0.0144	0.0495	0.0231	0.0267	0.0232	0.0214	0.028	0.0182	0.1986	0.039	0.0225	0.039	0.036	0.0211	0.0399	0.0727	0.2165	0.0543	0.0422	0.0428	0.0705	0.0192	0.0199	0.0468	0.0293	0.0262	0.034	0.0305	0.0366	0.0358	0.0216	0.0315	0.0279	0.0192	0.2421	0.0357	0.0265	0.0136	0.015
MASTL_11064_AA	0.4731	0.4085	0.6031	0.5517	0.4057	0.5801	0.5919	0.3259	0.381	0.3672	0.3006	0.4057	0.4417	0.392	0.3259	0.4129	0.525	0.6803	0.1078	0.2789	0.5542	0.3874	0.4204	0.5801	0.6111	0.2165	0.1621	0.4129	0.5371	0.4362	0.3559	0.6769	0.436131	0.3792	0.2545	0.4532	0.4916	0.4916	0.5229	0.5301	0.1717	0.4129	0.5473	0.205	0.6592	0.4417	0.5301	0.3715	0.5154
PARD3_11214_AD	0.4476	0.253	0	0.4817	0.2076	0.5679	0.2611	0.367	0.1667	0.2035	0.1639	0.3672	0.3807	0.2381	0.2356	0.1882	0.2484	0.0396	0.1486	0.3198	0.3613	0.445	0.3089	0.2939	0.4079	0.203	0.3897	0.118	0.2618	0	0.345	0.1646	0.4324	0.2587	0.4703	0.0902	0.1962	0.1543	0.3403	0.2941	0.4032	0.2756	0.2143	0.4165	0.309818	0.5597	0.6396	0.4005	0.5787
CUL2_11226_AD	0.5709	0.8104	0.5953	0.5502	0.6016	0.4879	0.4518	0.5794	0.4311	0.578487	0.6176	0.5881	0.6656	0.5003	0.5697	0.5475	0.6909	0.6403	0.578487	0.5881	0.5442	0.3354	0.675	0.4429	0.5094	0.578487	0.302	0.7616	1	0.5565	0.7324	0.6533	0.645	0.4877	0.5806	0.5456	0.9227	0.3687	0.2658	0.578487	0.5945	0.4056	0.4831	0.6966	1	0.4091	0.7733	0.6265	0.6607
CREM_11244_AD	0.4018	0.3841	0.335	0.5443	0.2514	0.6056	0.6961	0.6684	0.3976	0.42582	0.4274	0.4018	0.3654	0.5806	0.4236	0.4471	0.3016	0.3589	0.42582	0.5019	0.3827	0.6684	0.3768	0.8382	0.4229	0.1943	0.4419	0.1144	0.7706	0.4564	0.4463	0.4676	0.2718	0.4018	0.5323	0.4847	0.4419	0.2514	0.6459	0.4725	0.5443	0.368	0.6859	0.4509	0.6825	0.4247	0.6825	0.42582	0.42582
ZFAND4_11373_AD	1	0.8266	0.8266	0.8949	1	1	1	1	0.8719	0.924692	1	1	1	0.6519	1	1	1	0.8157	1	0.8719	1	0.6299	1	1	1	1	1	1	1	1	0.6299	0.7314	0.7892	1	0.7638	1	1	0.6803	1	1	1	1	1	0.6375	0.924692	0.7814	1	1	0.863
C10orf128_11514_AD	0.3402	0.6074	0.239054	0.2955	0.0957	0.3756	0.2396	0.3005	0.2157	0.239054	0.2008	0.3402	0.1788	0.171	0.2227	0.172	0.1847	0.2713	0.062	0.3296	0.1233	0.1603	0.1467	0.1642	0.3181	0.1001	0.2789	0.0957	0.239054	0.2276	0.1361	0.2227	0.1209	0.167	0.0951	0.1736	0.4509	0.4221	0.1233	0.2967	0.1074	0.4743	0.2099	0.3293	0.4361	0.2396	0.2702	0.2348	0.242
ASAH2B_11576_AA	0.876	0.9023	0.9288	0.9157	1	1	0.8176	0.8938	1	0.7793	0.7171	0.5916	0.7918	0.8029	0.6197	0.8968	0.6553	1	0.876512	0.9194	0.8129	1	0.876512	1	0.5207	0.876512	0.876512	0.7652	0.876512	0.876512	1	1	0.8302	0.7492	0.867	0.7918	0.7918	0.8302	1	0.876512	1	1	0.8968	0.8873	0.876512	0.8907	1	0.9117	0.6707
STOX1_11963_AD	0.8351	0.8441	0.8524	0.9136	0.7746	1	0.8396	0.8762	0.8491	0.7083	0.7707	0.7669	0.8073	1	0.9617	0.7175	1	0.9178	0.4819	0.7435	0.8399	0.9485	0.6842	0.852	0.893	0.813	0.7758	0.9475	1	0.7485	0.6455	0.6656	0.7679	0.5493	0.7233	0.6757	0.629	0.6597	0.7908	0.7148	0.8029	0.7485	0.9112	0.8019	0.6783	0.8638	0.6914	0.8582	0.8624
KAT6B_12264_AD	0.6644	0.8605	0.8499	0.7737	1	0.6237	0.821	0.8173	0.6379	0.8326	0.8351	0.8435	0.6951	0.9189	0.8223	0.83	1	1	0.84959	0.8326	0.7965	1	0.5004	0.8234	0.8907	1	0.7437	0.7437	0.84959	0.8107	0.8855	0.8566	0.8587	0.6302	0.8713	0.8899	0.9256	1	0.9515	0.918	0.854	0.8201	0.9063	0.8939	1	0.8861	0.7651	0.8593	0.8524
KAT6B_12265_AD	0.3955	0.7243	0.8678	0.6345	0.7052	0.5443	0.8407	0.7644	0.8732	0.8173	0.6521	0.8352	0.796	0.9301	0.7574	0.7943	0.8809	0.8447	0.801973	0.7051	0.5908	0.7939	0.51	0.7502	0.8427	1	1	0.5793	0.801973	1	0.8031	0.7869	0.8007	0.6974	0.8674	0.8423	0.7914	0.8671	0.8662	0.8535	0.7908	0.8102	0.8769	0.741	1	0.8829	0.9524	0.6838	0.7759
KAT6B_12266_AD	0.6291	0.4358	0.6494	0.5237	0.574327	0.5494	0.5864	0.5191	0.8858	0.748	0.5368	0.7877	0.7136	0.6822	0.4951	0.5999	0.574327	0.574327	0.574327	0.6482	0.2907	0.574327	0.6368	0.5835	0.5732	0.574327	1	0.5187	0.574327	0.574327	0.4484	0.4753	0.8896	0.6363	0.7234	0.6031	0.2738	0.574327	0.5174	0.7207	0.5338	0.5169	0.5688	0.2963	0.574327	0.5996	0.8782	0.353	0.4917
SEMA4G_12848_AD	0.698227	0.5775	0.7873	0.7014	0.5775	0.6308	0.8567	0.6627	0.698227	0.698227	0.5992	0.9038	0.6527	0.7352	1	0.6699	0.698227	0.7873	0.698227	0.7736	0.695	0.6103	0.698227	0.7494	0.7014	0.698227	0.698227	0.7523	0.698227	0.698227	0.8724	0.6578	0.698227	0.758	0.5447	0.8103	0.494	0.5325	0.6308	0.6308	1	0.8368	0.6811	0.6246	0.7193	0.6699	0.6308	0.5447	0.695
MRPL43_12856_AD	1	0.91	0.8842	0.9696	0.9231	0.7238	0.9484	0.9141	0.904	0.497	0.6166	0.9619	0.9747	0.279	0.9154	0.1532	0.5675	0.6871	0.8732	0.9834	0.9363	0.9705	0.5982	0.9399	0.6867	0.9197	0.9446	0.9621	0.961	0	0.2182	0.4363	0.6057	0.9464	0.616	0.9633	0.4245	0.9309	0.8998	0.1205	0.1948	0.5795	0.5728	0.5612	0.9119	0.6298	0.0784	0.9103	0.2252
POLL_12901_AD	1	0.4773	0.4693	0.56	0.7295	0.6753	0.7966	0.7079	0.9103	1	0.7894	0.8693	0.5283	0.4823	0.6947	0.746	0.4351	0.7085	0.4738	0.6376	0.5052	0.4909	0.5427	0.713	0.7997	0.6482	0.7743	0.5449	0.6809	1	0.8289	0.7146	0.482	0.8293	0.6588	0.6617	0.8737	0.8242	0.3486	0.5259	0.5455	0.6757	0.7812	0.6432	0.3039	0.5672	0.6787	0.8115	0.8504
POLL_12906_AD	0.2559	0.17313	0.1365	0.1073	0.134	0.1455	0.2815	0.1242	0	0	0.0763	0.0905	0.1442	0.1984	0.0571	0.2946	0.2135	0	0.2305	0.1445	0.2049	0.0773	0.08	0.1913	0.1425	0.0835	0.2516	0.2436	0.0743	0.051	0.0899	0.1917	0.1862	0.2021	0.1657	0.0779	0.2756	0	0.0754	0.111	0.1778	0.1197	0.1831	0.2168	0	0.204	0.2972	0.0712	0.1317
POLL_12907_AD	0.3478	0.2168	0.249	0.229	0.3205	0.2496	0.2483	0.2157	0.0844	0	0.2194	0.2449	0.3353	0.3404	0.206	0.41	0	0.1643	0.3019	0.0538	0.3277	0.0864	0.1817	0.1618	0.1091	0.3002	0.228759	0.3471	0.2822	0	0.2719	0.2458	0.3245	0.2478	0.2726	0.2538	0.2917	0.1233	0.1278	0.0917	0.1335	0.1564	0.0656	0.1924	0.3782	0.353	0.2324	0.1987	0.128
CALHM2_13012_AA	0.3702	0.5171	0.3403	0.4101	0.4459	0.6591	0.5064	0.4066	0.4265	0.537	0.4402	0.437	0.4384	0.5547	0.6259	0.514	0.4384	0.3701	0.2949	0.4777	0.4641	0.4789	0.2583	0.397	0.4986	0.31	0.8131	0.3163	0.4046	0.402	0.4064	0.2337	0.4499	0.4726	0.3709	0.3936	0.3497	0.4652	0.2831	0.3399	0.3841	0.4366	0.3634	0.445	0.3085	0.3096	0.5705	0.6195	0.4947
CALHM2_13017_AA	0.5886	0.5589	0.4244	0.6869	0.7866	0.6663	0.5213	0.6255	0.5933	0.6973	0.7407	0.7517	0.6032	0.6262	0.4087	0.6973	0.783	0.5802	0.6056	0.4864	0.6482	0.6575	0.4918	0.6385	0.6282	0.5407	0.652638	0.6912	0.7108	0.5802	0.665	0.7596	0.6482	0.6365	0.6663	0.6707	0.4729	0.6203	0.5589	0.7144	0.5891	0.6746	0.5513	0.6973	0.6562	0.6265	0.5875	0.7633	0.5633
SIRT3_13624_AD	0.7652	0.6435	0.7334	0.6104	0.842	0.7565	0.7946	0.7841	0.6528	0.6007	0.6671	0.7189	0.5301	0.7126	0.55	0.6298	0.8964	0.6136	0.8713	0.5217	0.7006	0.7862	0.5752	0.8404	0.7758	0.6528	0.6066	0.4973	0.593	0.593	0.9275	0.6295	0.8459	0.8794	0.8575	0.6845	0.8332	0.7295	0.6528	0.6929	0.5796	0.7226	0.6792	0.9367	0.916	0.9338	0.8716	0.6151	0.6766
RNH1_13675_AA	0.3411	0.2309	0.3231	0.1787	0.458	0.2419	0.0529	0.1745	0.1439	0.2005	0.3695	0.6291	0.3147	0.3184	0.2912	0.2403	0.161	0.4809	0.2155	0.3833	0.1024	0.3288	0.2067	0.1798	0.5648	0.2602	0.253	0.117	0.3769	0.3904	0.2186	0.1126	0.4892	0.3917	0.3986	0.2711	0.3811	0.573	0.1199	0	0.4911	0.3232	0.3449	0.2872	0.4724	0.0482	0.1986	0.1836	0.2245
RASSF7_13691_AA	0.5473	0.1974	0.3139	0.3795	0.3335	0.3785	0.0985	0.3645	0.4349	0.5172	0.263	0.4306	0.3713	0.6102	0.1138	0.4366	0.1985	0.2672	0.5324	0.3174	0.3929	0.6304	0.1721	0.4881	0.5885	0.3923	0.5938	0.5158	0.3828	0.1988	0.1627	0.2277	0.398	0.4076	0.5465	0.5157	0.3669	0.3463	0.2697	0.4117	0.2503	0.401	0.3908	0.4378	0.5634	0.5255	0.5257	0.2691	0.3193
RASSF7_13692_AD	0.5291	0.4459	0.5233	0.6501	0.5565	0.5965	0.4852	0.4743	0.6906	0.5959	0.6619	0.5121	0.5726	0.7407	0.3505	0.7217	0.5686	0.6362	0.6618	0.3091	0.6041	0.766	0.4065	0.5729	0.6915	0.5026	0.7377	0.5853	0.5597	0.5346	0.5766	0.4777	0.5573	0.5715	0.5732	0.5838	0.5378	0.5249	0.4792	0.6679	0.2978	0.6011	0.5772	0.4978	0.591	0.6689	0.4958	0.7308	0.5607
PHRF1_13698_AA	0.7437	0.8186	0.8376	0.8764	0.749737	0.6476	0.7206	0.6885	0.7303	0.749737	0.5752	0.749737	0.749737	0.8713	0.7154	0.8665	0.9312	0.7946	0.749737	0.7586	0.8131	1	0.4916	0.6592	0.8915	0.749737	0.749737	0.6445	0.749737	1	0.6171	0.4583	0.6286	0.749737	0.2661	0.6592	0.6769	0.8457	0.8024	0.749737	1	0.7668	0.853	0.8713	0.749737	0.5632	0.6989	0.8713	0.853
IRF7_13708_AA	0.439854	0.0676	0.439854	0.5139	0.337	0.2652	0.7071	0.4624	0.439854	0.439854	0.5889	0.34	0.5195	0.4478	0.3507	0.6811	0.1264	0.55	0.4224	0.8227	0.5136	0.4128	0.3626	0.2971	0.611	0.3821	0.3768	0.439854	0.3616	0.534	0.439854	0.2282	0.439854	0.3843	0.4496	0.7192	0.6886	0.4974	0.3179	0.2627	0.4386	0.5725	0.2711	0.4894	0.2996	0.4303	0.4724	0.0845	0.439854
PIDD_13769_AA	0.8201	0.5432	0.5692	0.3579	0.4515	0.6408	0.6754	0.6408	0.4977	0.622551	0.7279	0.5908	0.692	0.5553	0.5811	0.7483	0.5811	0.7182	0.622551	0.4296	0.4777	0.5811	0.7279	0.7104	0.4219	0.563	0.4333	0.6987	0.5432	0.5667	0.704	0.6037	0.856	0.7279	0.5566	0.7279	0.7784	0.6095	0.6754	0.6709	0.5432	0.7329	0.7451	0.8117	0.7944	0.5723	0.8462	0.7113	0.3273
RPLP2_13770_AD	0.0748	0.3378	0.0637	0.0667	0.1548	0.1006	0.1841	0.1423	0.239005	0.1028	0.2607	0.0825	0.0357	0.2784	0.311	0.0711	0.0759	0.2734	0.0697	0.081	0.1748	0.1268	0.2643	0.1335	0.0414	0.1096	0.0923	0.5808	0.1946	0.1214	0.0536	0.2394	0.3167	0.0783	0.1944	0.5297	0.1723	0.3107	0.1132	0.3134	0.1961	0.3955	0.5269	0.2274	0.3287	0.1571	0.4445	0.1826	0.165
CDKN1C_13929_AD	0.5468	0.7295	0.8148	0.8696	0.7931	1	1	1	0.5156	1	1	1	1	0.8563	1	0.7187	0.782741	0.8255	0.8324	0.782741	0.4701	0.8196	0.6889	0.4984	0.7008	0.4599	0.4984	0.7447	0.7681	1	1	0.8534	0.4081	1	0.7329	0.854	0.6943	1	0.6529	0.7187	0.427	0.6543	0.5156	1	0.7642	0.6986	0.707	0.7008	0.8284
PGAP2_14004_AD	0.2867	0.2743	0.1875	0.5031	0.4694	0.2294	0.2257	0.2771	0.3301	0.3019	0.3185	0.3064	0.2431	0.3849	0.584	0.4465	0.8277	0.3054	0.4992	0.5112	0.4287	0.3645	0.2523	0.4885	0.3081	0.2407	0.4466	0.4625	0.3642	0.3711	0.2091	0.3359	0.4206	0.2625	0.2494	0.4375	0.5471	0.4624	0.5103	0.6113	0.3279	0.4319	0.3952	0.4314	0.6833	0.5853	0.4815	0.5125	0.3115
TRIM5_14078_AD	0.695	0.6597	0.5002	0.6438	0.7177	0.6131	0.6287	0.7468	0.6103	0.7547	0.8408	0.5215	0.6509	0.4844	0.5396	0.5776	0.54	0.6885	0.8483	0.7189	0.5458	0.6583	0.6213	0.6194	0.7441	0.4562	0.6911	0.5752	0.5542	0.6509	0.528	0.6911	0.715	0.6222	0.5816	0.624	0.6604	0.7885	0.5432	0.528	0.5606	0.7939	0.712	0.7157	0.8564	0.6992	0.4593	0.7425	0.6851
ILK_14170_AA	1	1	1	0.8839	1	1	1	1	0.899583	1	0.8122	1	0.9022	1	0.7918	1	0.899583	1	1	1	0.7323	1	1	1	0.8557	0.899583	1	0.9323	0.8282	1	0.848	1	1	1	0.8081	0.8724	1	0.7992	0.7549	0.91	1	1	1	0.8218	1	0.87	1	1	1
RPL27A_14257_AA	0.8601	0.8708	0.931	0.7785	0.6543	0.5654	0.8388	0.8438	0.5867	0.5496	0.6612	0.8357	0.8547	1	0.9752	0.176	0.2791	0.2606	0.8039	0.9473	0.4488	0.6059	0.8154	0.7574	0.1974	0.5156	0.7354	0.8255	0.9235	0.8765	0.9298	0.9586	1	0.5385	0.2911	0.9818	0.9357	0.8747	0.1654	0.8466	0.9602	0.3573	0.3594	0.3392	0.5023	0.434	0.8324	0.6739	0.814
ZBED5_14401_AA	0.2588	0.1942	0.3284	0.3031	0.1549	0.2755	0.3133	0.3419	0.2986	0.402	0.2561	0.3508	0.2615	0.3415	0.2068	0.1898	0.2572	0.2611	0.290949	0.1779	0.1732	0.2268	0.3014	0.2984	0.5006	0.3284	0.4231	0.2566	0.1732	0.2391	0.3378	0.2447	0.4611	0.3327	0.7549	0.3667	0.5127	0.25	0.3017	0.5538	0.3056	0.3056	0.2378	0.2139	0.8042	0.326	0.2785	0.1991	0.2319
COPB1_14469_AD	0.3127	0.2834	0.4719	0.1871	0.1755	0.2762	0.2619	0.2015	0.2619	0.2398	0.2155	0.3459	0.4013	0.3375	0.2474	0.3647	0.4116	0.2566	0.30531	0.3364	0.2814	0.2398	0.2719	0.2731	0.2128	0.1507	0.30531	0.2677	0.2282	0.3101	0.3081	0.3941	0.1571	0.2467	0.2358	0.458	0.1452	0.296	0.3212	0.2746	0.3482	0.341	0.2169	0.2512	0.612	0.3212	0.3301	0.3316	0.5356
HTATIP2_14712_AD	0.5611	0.5831	0.4656	0.6106	0.5309	0.6945	0.7285	0.5276	0.6713	0.4656	0.6609	0.4281	0.6947	0.5994	0.3641	0.5516	0.5405	0.7176	0.6725	0.4656	0.8229	0.6657	0.5788	0.5039	0.5296	0.5765	0.4617	0.8647	0.5204	0.5335	0.4697	0.6129	0.4765	0.8217	0.6549	0.7278	0.6306	0.5744	0.5964	0.6091	0.5727	0.7616	0.6854	0.742	0.4541	0.474	0.5759	0.3433	0.6559
HTATIP2_14714_AD	0.1652	0.1457	0.2016	0.219	0.1389	0.2969	0.2447	0.276	0.2047	0.1101	0.2251	0.1881	0.2632	0.1619	0.0822	0.1396	0.1143	0.2652	0.2686	0.2155	0.2148	0.1306	0.1815	0.2518	0.2961	0.2759	0.2082	0.294	0.2051	0.1979	0.1861	0.1872	0.2765	0.3167	0.2951	0.2603	0.2971	0.3101	0.1749	0.171	0.1615	0.2288	0.1682	0.216	0.2207	0.1814	0.1458	0.1566	0.2923
METTL15_14787_AA	0.375	0.4199	0.5075	0.7327	0.8571	0.8615	0.617	0.7317	0.5217	0.6087	0.5063	0.5714	0.6809	0.4	0.5055	0.7626	0.6757	0.4677	0.576485	0.6512	0.6154	0.6667	0.3077	0.6923	0.5556	0.576485	0.576485	0.4396	0.576485	0.5385	0.6471	0.5234	0.2667	0.8657	0.5714	0.4466	0.52	0.5479	0.5636	0.4906	0.8696	0.6739	0.5263	0.6538	0.5909	0.7042	0.3143	0.7761	0.6866
CD44_14979_AA	0.626	0.6592	0.7303	0.4362	0.6237	0.501	0.6001	0.5317	0.5752	0.5837	0.6286	0.4678	0.4362	0.7946	0.559725	0.5496	0.6286	0.5312	0.559725	0.5211	0.5542	0.4916	0.4462	0.5919	0.4462	0.381	0.559725	0.5301	0.559725	0.4362	0.5116	0.6263	0.6592	0.6803	0.6885	0.584	0.5259	0.4666	0.6423	0.5865	0.7378	0.5919	0.5589	0.4916	0.559725	0.4653	0.6351	0.6122	0.5194
C11orf74_15442_AD	0.472	0.5197	0.1978	0.4117	0.4312	0.3887	0.492	0.3716	0.6554	0.412	0.5946	0.3426	0.4697	0.5017	0.5142	0.3412	0.4065	0.5447	0.5493	0.4105	0.4441	0.3346	0.4407	0.4183	0.578	0.459	0.3115	0.6792	0.4717	0.471	0.3354	0.5234	0.4945	0.3567	0.4773	0.6394	0.4331	0.4131	0.4361	0.2983	0.2774	0.3784	0.4838	0.4027	0.3582	0.3613	0.4406	0.4462	0.2881
TP53I11_15505_AD	0.8307	0.9547	0.9106	0.8876	0.7844	1	0.8105	1	0.9016	0.7347	0.8491	0.9057	1	0.8904	0.9199	0.8929	1	0.8767	0.891495	0.891495	1	0.8645	1	1	0.8205	1	0.891495	0.8901	1	0.9045	0.6794	0.9425	0.8873	1	0.8839	0.9308	1	0.9078	0.8467	1	1	1	0.9464	1	0.7586	0.8871	1	1	0.908
NR1H3_15700_AA	0.615	0.6945	0.622	0.7316	0.7577	0.5081	0.4319	0.7738	1	0.6441	0.7849	0.749	0.6822	0.6071	0.7242	0.6438	0.6886	0.6947	0.7874	0.7624	1	0.5897	0.8596	0.8494	0.7347	0.907	0.9573	0.7816	0.5891	0.9349	0.8693	0.6586	0.6203	0.6096	0.8532	0.7943	0.7384	1	0.7785	0.5614	0.6569	0.7196	0.6656	0.8142	0.9089	0.8588	1	1	0.9136
MADD_15719_AD	0.7159	0.5354	0.7297	0.6231	0.6105	0.6083	0.7591	0.4638	0.7684	0.4681	0.6599	0.702	0.7609	0.5727	0.6197	0.6837	0.6015	0.6008	0.61588	0.5811	0.6183	0.6464	0.7182	0.6617	0.6035	0.6087	0.4919	0.5	0.5642	0.552	0.6014	0.646	0.7333	0.7024	0.7333	0.5926	0.8508	0.6858	0.5851	0.6743	0.5852	0.5962	0.6596	0.4672	0.5946	0.6686	0.5664	0.641	0.6209
MADD_15720_AD	0.6055	0.4018	0.4228	0.4934	0.2984	0.5285	0.6405	0.4311	0.6481	0.4757	0.4638	0.4276	0.5931	0.6172	0.4149	0.4149	0.3744	0.4082	0.457213	0.4837	0.4955	0.4067	0.3538	0.6173	0.295	0.3142	0.2996	0.4165	0.4618	0.3525	0.4374	0.3496	0.565	0.5196	0.6298	0.5199	0.6269	0.5586	0.4488	0.706	0.545	0.4652	0.4875	0.3237	0.457213	0.5227	0.473	0.4682	0.3818
MADD_15723_AD	0.564	0.6047	0.601	0.5891	0.5489	0.7886	0.585	0.5708	0.5333	0.4932	0.5823	0.7434	0.5283	0.7154	0.5469	0.5489	0.5489	0.5516	0.596608	0.5565	0.6106	0.5665	0.6667	0.6269	0.7518	0.577	0.3972	0.6362	0.6543	0.8169	0.4883	0.5412	0.6348	0.6543	0.601	0.5559	0.7219	0.6294	0.6543	0.5297	0.7287	0.7512	0.5921	0.6904	0.8949	0.7574	0.526	0.6672	0.5262
CELF1_15763_AA	0.6882	0.6121	0.6963	0.5931	0.7206	0.8363	0.6305	0.6654	0.6731	0.8139	0.6314	0.8262	0.6729	0.568	0.6113	0.6435	0.7576	0.6434	0.8614	0.7781	0.7402	0.7083	0.664	0.7789	0.9118	0.6846	0.8476	0.7624	0.7738	0.7384	0.6789	0.5929	0.6598	0.8042	0.6372	0.578	0.7856	0.7487	0.6542	0.8557	0.6432	0.8447	0.7889	0.6192	0.7181	0.8051	0.6605	0.8272	0.6774
FAM111A_16025_AA	0.6092	0.6292	0.5258	0.6879	0.5543	0.648	0.4924	0.7228	0.5809	1	0.5359	0.6612	0.5764	0.6892	0.6405	0.7003	0.5296	0.7721	0.653639	0.6476	0.8591	0.4549	0.653639	0.6853	0.5607	0.653639	0.653639	0.5273	0.653639	0.4578	0.5519	0.6547	0.5809	0.6594	0.5904	0.577	0.6054	0.653639	0.5835	0.444	0.7408	0.6687	0.5831	0.6728	0.7426	0.7832	0.7186	0.7057	0.7431
FAM111A_16027_AA	0.8103	0.8793	0.9146	0.613	0.8525	0.6801	0.6772	0.91	0.783	1	0.8147	0.9346	0.8065	0.9514	0.818	0.7736	0.8527	0.8678	1	0.9095	0.7224	0.9779	0.5029	0.9717	0.7545	0.6521	1	1	0.79967	0.7921	0.9616	0.8237	0.8421	0.794	0.8752	0.7817	0.9465	0.8892	0.6741	0.945	0.8388	0.9722	0.9502	0.8273	1	1	0.8955	0.6131	0.8327
FAM111A_16029_AD	0.756166	0.9309	0.6132	0.6856	0.7902	0.7603	0.7351	0.704	0.756166	0.756166	0.588	0.7985	1	0.6132	1	0.7635	0.6132	0.7872	0.756166	0.8817	0.8134	0.8771	0.704	0.8087	0.7772	0.756166	1	0.6789	0.756166	0.6491	0.5924	0.7173	0.8638	0.8473	0.7405	0.8087	0.6647	0.526	0.9407	0.6132	0.6754	0.8532	0.7124	0.7255	0.756166	0.7136	0.6215	0.8048	0.7711
CYB561A3_16164_AA	0.4788	0.6494	0.5675	0.8274	0.6736	0.5701	0.5783	0.582	0.4651	0.5681	0.7069	0.6384	0.8198	0.6778	0.7809	0.7166	0.884	0.5597	0.9041	0.8566	0.822	0.6913	0.5935	0.6573	0.9599	0.6702	0.5493	0.5685	0.6505	0.7935	0.6732	0.5768	0.6898	0.6269	0.5415	0.6009	0.6945	0.7549	0.834	0.6421	0.5041	0.6937	0.6545	0.5878	0.5834	0.6774	0.7294	0.7128	0.7237
TMEM216_16189_AA	0.4565	1	1	1	1	0.4397	1	0.4709	1	0.425	0.4006	0.4841	0.4599	1	0.9391	1	1	1	1	1	1	1	1	1	1	0.99	0.3841	1	0.4925	1	1	1	0.3358	0.4296	1	1	1	1	1	1	1	1	1	1	1	1	0.4863	1	1
TMEM258_16285_AD	0.731351	1	0.5443	0.9167	0.5087	0.8534	0.66	0.731351	0.8506	1	0.7294	0.6331	0.8782	0.8038	0.8381	0.66	0.731351	0.6937	0.7985	0.618	0.6402	1	1	0.7213	0.8792	0.8161	0.7082	0.89	0.6743	0.5259	0.731351	0.8927	0.8661	0.731351	0.7845	0.7341	0.8381	0.5042	0.731	0.742	0.66	0.6709	0.5898	0.4632	0.7254	0.8269	0.7639	0.7213	0.8191
ASRGL1_16342_AA	0.5614	0.5263	0.4867	0.5161	0.3038	0.2759	0.4	0.4444	0.4934	0.3836	0.2945	0.6809	0.5161	0.4	0.4989	0.5161	0.2623	0.2373	0.439008	0.439008	0.5161	0.3077	0.5234	0.439008	0.4	0.4444	0.3836	0.4444	0.381	0.4	0.5378	0.4706	0.7619	0.439008	0.439008	0.3596	0.4275	0.4976	0.5399	0.4	0.5545	0.3478	0.3077	0.4324	0.3478	0.5161	0.5455	0.7059	0.439008
B3GAT3_16371_AA	0.2658	0.0898	0.1025	0.084	0.1531	0.0709	0.0988	0.1249	0.2001	0.2642	0.2484	0.2156	0.2457	0.1618	0.3883	0.28	0.1573	0.4173	0.0556	0.3128	0.2592	0.1056	0.1909	0.2708	0.2654	0.0718	0.3042	0.2394	0.0597	0.0603	0.1413	0.0913	0.2422	0.0947	0.0759	0.0946	0.1163	0.1083	0.0988	0.1103	0.0672	0.1235	0.1128	0.1164	0.21	0.113	0.3433	0.3523	0.1071
POLR2G_16418_AD	0.613051	0.6603	0.8409	0.695	0.7986	0.5692	0.613051	0.5282	0.8325	1	0.7463	0.6939	0.7295	0.8537	0.749	0.5992	0.6013	0.7963	0.9364	0.8777	0.7416	0.8143	0.7302	0.8079	0.8234	0.8696	0.6623	0.7453	0.4121	0.8178	0.8323	0.6443	0.4998	0.4934	0.7003	0.8722	0.8686	0.9125	0.3299	0.7388	0.3273	0.7783	0.7725	0.6319	0.6823	0.8356	0.8774	0.5929	0.894
NAA40_16552_AA	0.2996	0.1831	0.4658	0.3634	0.3509	0.3673	0.2189	0.3074	0.1389	0.1008	0.3171	0.341	0.4226	0.4533	0.2455	0.2649	0.4249	0.4567	0.1893	0.3552	0.3111	0.4952	0.1332	0.3711	0.37	0.2842	0.5577	0.7616	0.1831	0.5836	0.4288	0.4491	0.4752	0.5484	0.3445	0.5436	0.7443	0.48	0.3705	0.6005	0.3382	0.5383	0.5167	0.5257	0.8896	0.6481	0.7625	0.2505	0.1954
MEN1_16706_AD	0.6088	0.5425	0.8877	0.8405	0.8996	0.7477	0.5266	0.6174	0.5515	0.691918	0.5037	1	0.8469	0.813	0.6268	0.5754	0.7435	0.5493	0.691918	1	0.6849	0.8509	0.8877	0.5917	0.8877	1	1	0.5685	0.6484	0.4676	1	0.5717	0.7192	0.691918	0.5559	0.4946	1	0.6975	0.6991	1	0.7167	0.7449	0.6334	0.7661	0.7198	0.6954	0.6372	0.554	0.5464
ATG2A_16713_AD	0.5841	0.7108	0.6732	0.6698	0.6161	0.6519	0.6519	0.7216	0.5462	0.4573	0.7202	0.5489	0.8489	0.6959	0.7478	0.7291	0.3188	0.6664	0.7892	0.5462	0.5513	0.6713	0.6698	0.7088	0.4503	0.714	0.6781	0.594	0.6898	0.4007	0.7088	0.3979	0.6781	0.5425	0.5504	0.7783	0.692	0.4835	0.5786	0.5628	0.3843	0.5462	0.6519	0.6732	0.6519	0.4835	0.7165	0.5392	0.621
FAU_16772_AA	0.8029	1	0.56	0.6506	0.8573	1	0.8788	0.7568	0.819793	0.7689	0.9366	0.6679	0.9087	0.7639	1	0.8137	0.819793	0.8516	0.6991	0.7626	0.6411	0.9005	0.6626	0.761	0.9558	0.8535	0.7653	0.6727	0.7907	0.7654	0.743	0.8103	0.6367	0.7968	0.8535	0.7515	0.9482	0.766	0.8213	0.8534	0.7347	0.837	0.9613	0.8539	0.9312	0.9677	0.8026	1	0.6044
FAU_16773_AD	0.6685	1	0.4737	0.5882	0.7177	1	0.8557	0.6698	0.7161	0.7823	0.9303	0.5067	0.895	0.6071	1	0.6843	1	0.783	0.5855	0.7071	0.6277	0.79	0.4769	0.7438	0.8883	0.7959	0.6137	0.5488	0.5824	0.5519	0.6108	0.7336	0.4201	0.6342	0.7982	0.6487	0.9219	0.6594	0.7926	0.7606	0.7106	0.6391	0.9306	0.7575	0.8513	0.9378	0.7143	1	0.4919
SCYL1_16856_AA	0.6702	0.6799	0.6666	0.613	0.6591	0.4194	0.6915	0.7823	0.7759	0.5769	0.4288	0.7733	0.6093	0.6194	0.7317	0.9051	0.6312	0.7558	0.8124	0.8799	0.9009	0.9173	0.6436	0.7403	0.9253	0.6544	0.8015	0.9315	0.6282	0.9033	0.7969	0.6861	0.831	0.8489	0.5713	0.6851	0.8185	0.8715	0.6841	0.8041	0.7251	0.8198	0.7685	0.7867	0.7114	0.8725	0.7752	0.6812	0.8282
EIF1AD_16960_AA	0.9249	0.8168	0.8304	0.8776	0.6118	0.9326	0.7116	0.6814	0.8622	0.795494	0.945	0.7557	0.767	0.6071	0.6861	0.6756	0.8643	0.8832	0.9027	0.6214	0.6463	0.6983	0.6762	0.8053	0.9477	0.8641	0.573	0.6399	0.7921	0.6961	0.7396	0.7459	0.7852	0.7813	0.9027	0.8885	0.8153	0.6311	0.8262	1	0.8147	0.723	0.8302	0.8196	0.7565	0.6949	0.8582	0.6927	0.8603
EIF1AD_16962_AA	0.7927	0.722458	0.8419	0.7491	0.722458	0.751	0.597	0.6631	0.8425	0.6901	0.7751	0.7763	0.837	0.7474	0.8381	0.7283	0.722458	0.787	0.7134	0.5861	0.6699	0.6444	0.4538	0.8183	0.8474	0.819	0.6683	0.6099	0.8582	0.722458	0.722458	0.7032	0.7471	0.7637	0.82	0.8554	0.6525	0.8083	0.8105	0.7866	0.8598	0.754	0.722458	0.6992	0.722458	0.722458	0.8744	0.835	0.7219
EIF1AD_16965_AA	0.4636	0.635	0.5625	0.5014	0.2632	0.471	0.2667	0.3438	0.4251	0.44	0.5882	0.4915	0.541	0.3589	0.5833	0.4428	0.3636	0.6667	0.5525	0.2971	0.3171	0.3609	0.3099	0.3679	0.4322	0.7333	0.1691	0.386	0.4024	0.557	0.5858	0.5116	0.3667	0.4815	0.5708	0.5625	0.4731	0.4323	0.4223	0.4074	0.4291	0.4454	0.541	0.4899	0.4853	0.5116	0.5448	0.3938	0.3802
EIF1AD_16974_AA	0.8708	0.7201	0.8883	0.7804	0.7661	0.8241	0.6926	0.8932	0.8463	0.5546	0.7578	0.5825	0.5817	0.8965	0.9041	0.8171	0.8318	0.6194	0.8514	0.8065	0.6938	0.8574	0.928	0.8672	0.7788	0.6802	0.8869	0.7262	0.5674	1	1	1	0.6864	0.8426	0.7518	0.8981	0.5768	0.6466	0.7759	0.7089	0.7671	1	0.8337	0.7266	0.9039	0.6816	0.8163	0.7785	0.5423
BANF1_16981_AD	0.5259	0.6827	0.5787	0.9951	0.9916	0.6795	1	0.4599	0.9378	0.441	1	0.8905	0.6592	0.9764	0.7062	0.6546	0.5966	0.6283	0.8472	0.5894	0.9374	0.8862	0.9263	0.9021	0.631	0.931	0.9957	0.6832	0.9165	0.9024	0.7331	0.6057	0.9569	0.924	0.8996	0.9477	0.9181	0.9327	0.8922	0.5742	0.5087	0.7044	0.9759	0.9292	0.9163	0.9638	0.6893	0.9431	0.5966
KLC2_16996_AA	0.2268	0.4251	0.0786	0.3057	0	0.2761	0.2383	0.2801	0.2604	0.0858	0.4541	0.1675	0.3056	0.3194	0.3812	0.3094	0.318408	0.4376	0.318408	0.318408	0.3456	0.3763	0.4131	0.0765	0.2038	0.0376	0.318408	0.451	0.2383	0.3456	0.2318	0.3194	0.3849	0.2869	0.4681	0.2548	0.3763	0.2378	0.4389	0.6787	0.2017	0.2424	0.2089	0.2473	0.318408	0.177	0.1593	0.5759	0.3572
DPP3_17040_AA	0.3767	0.381	0.3006	0.3731	0.464304	0.5473	0.3259	0.1621	0.3559	0.7946	0.4916	0.464304	0.2438	0.525	0.5675	0.3672	0.3513	0.401	0.5473	0.5194	0.5144	0.6592	0.3259	0.7343	0.2438	0.464304	0.464304	0.7632	0.3259	0.3731	0.3259	0.4149	0.4916	0.3495	0.5517	0.6929	0.641	0.2438	0.5014	0.4462	0.392	0.3453	0.3259	0.311	0.464304	0.518	0.4293	0.4916	0.381
C11orf80_17123_AA	0.7326	0.8713	0.5919	0.4738	0.6445	0.7105	0.6929	0.6895	0.5473	0.656343	0.656343	0.7316	0.8764	0.7719	0.7946	0.6171	0.6171	0.6171	0.4916	0.7247	0.6873	0.6683	0.6286	0.6451	0.5599	0.5919	0.7021	0.656343	1	0.6592	0.4085	0.4462	0.6007	0.6255	0.6851	0.6286	0.5781	0.5919	0.6524	0.4916	0.5856	0.7326	0.6515	0.6829	0.656343	0.6305	0.5919	0.6779	0.6719
TBC1D10C_17191_AD	0.1796	0.0616	0.3356	0.1342	0.1161	0.3444	0.1689	0.0519	0.0789	0.0519	0.1325	0.1928	0.199	0.2546	0.266	0.2001	0.2281	0.185	0.2496	0.3964	0.2386	0.1096	0.0657	0.0887	0.3053	0.1681	0.094	0.4338	0.0629	0.174	0.1681	0.1646	0.1449	0.1666	0.0805	0.2549	0.3537	0.2559	0.1756	0.2472	0.1112	0.2526	0.1838	0.0987	0.2729	0.3495	0.2552	0.0499	0.0334
RPS6KB2_17202_AA	0.6171	0.5919	0.7437	0.7303	0.560327	0.560327	0.560327	0.4204	0.4362	0.3672	0.560327	0.3559	0.6929	0.7206	0.7206	0.4916	0.560327	0.6592	0.8855	0.392	0.4916	0.6351	0.4916	0.6171	0.4916	0.8286	0.6929	0.4037	0.5919	0.560327	0.6592	0.6769	0.560327	0.7267	0.560327	0.4462	0.560327	0.5134	0.7437	0.2711	0.4583	0.525	0.5708	0.3767	0.4462	0.4916	0.4085	0.560327	0.560327
FAM86C1_17444_AA	0.2371	0.2106	0.2165	0.068	0.2165	0.1677	0.3403	0.2438	0.2733	0.3453	0.3142	0.1295	0.1078	0.0808	0.3495	0.1508	0.183686	0.2249	0.183686	0.1621	0.1677	0.1295	0.1364	0.2555	0.2029	0	0.0225	0.1717	0.2894	0.183686	0.2661	0.2627	0.2029	0.2165	0.1854	0.1388	0.0746	0.205	0.1165	0.1872	0.0776	0.1295	0.2438	0.1621	0.057	0.1313	0.1717	0.1698	0.1947
IL18BP_17485_AD	0.5103	0.6185	0.8006	0.7599	0.3667	0.6185	0.7181	0.7875	1	0.721255	0.5047	0.721255	0.7221	0.486	0.721255	0.7844	0.9307	0.7253	0.5238	0.6801	0.5816	0.6086	0.5742	0.84	0.699	0.5346	0.6185	0.721255	0.4809	0.733	0.6758	0.6069	0.7226	0.6413	0.7086	0.721255	0.6296	0.777	0.905	0.7039	0.3298	0.7687	0.7577	0.5366	0.721255	0.7181	0.8652	0.5238	1
IL18BP_17503_AD	0.0531	0.3161	0.8193	0.7522	0.1698	0.3158	0.2849	0.463192	0.4276	0.463192	0.4367	0.463192	0.3286	0.5887	0.463192	0.3286	0.6396	0.4417	0.1171	0.7168	0.2356	0.6001	0.1109	0.6302	0.306	0.2385	0.6583	0.463192	0.104	0.1672	0.4169	0.4268	0.6007	0.4483	0.1325	0.463192	0.3853	0.4169	0.4392	0.6659	0.463192	0.4471	0.4312	0.2833	0.463192	0.3814	0.2163	0.6388	0.3478
ANAPC15_17570_AD	0.5436	1	0.7507	1	0.6984	0.727	0.3165	0.8065	0.5103	0.7643	0.9318	0.6631	0.8576	0.5602	0.6185	1	0.735744	0.8576	0.6984	0.7765	0.735744	0.7875	0.6397	1	1	0.8294	1	0.8224	0.5366	0.735744	0.4592	0.8148	1	0.8224	0.7643	0.8224	0.7432	0.6758	0.5009	0.7507	1	1	0.7974	0.5366	0.8065	1	0.6631	0.6758	0.8224
STARD10_17647_AD	0.7142	0.742275	0.8677	0.8395	0.6939	0.6563	0.7038	0.8372	0.694	0.742275	0.742275	0.8852	0.8929	0.8536	0.4259	0.7486	0.742275	0.5833	0.5633	0.9437	0.739	0.7693	0.8529	0.8169	0.8334	0.681	0.8668	0.7455	0.5923	0.6724	0.8316	0.7252	0.6942	0.9026	0.5876	0.8006	0.9516	0.6825	0.5334	0.7946	0.7128	0.9287	0.7299	0.7626	0.7407	0.8225	0.8316	0.7631	0.8432
ATG16L2_17651_AD	0.4134	0.5116	0.7366	0.497	0.7854	0.4847	0.6769	0.6513	0.3312	0.3046	0.3422	0.4583	0.4409	0.5365	0.7123	0.5655	0.5333	0.8351	0.3636	0.7099	0.573	0.5684	0.2936	0.4228	0.6729	0.3837	0.4474	0.8425	0.3593	0.6123	0.5413	0.5561	0.4842	0.6135	0.4429	0.7692	0.702	0.5012	0.6263	0.7074	0.7332	0.7722	0.7051	0.8162	0.8026	0.735	0.8029	0.3481	0.3966
ATG16L2_17653_AA	1	0.9026	0.7773	1	1	0.8011	0.9006	1	0.8011	0.872649	0.8224	0.8965	0.9355	0.8773	1	0.8757	1	0.6833	0.8538	0.9673	0.9172	1	0.4461	0.9113	1	1	1	0.8802	0.6823	1	1	0.7205	0.8088	0.9172	0.6928	0.8409	0.8943	0.7488	1	0.9662	1	0.9143	0.9026	0.9589	0.8887	0.8555	0.7366	0.7513	1
ATG16L2_17666_AA	0.4209	0.6071	0.5231	0.4617	0.4478	0.5329	0.5398	0.4155	0.5329	0.52276	0.663	0.6339	0.8776	0.4952	0.5142	0.4896	0.6725	0.5484	0.4701	0.716	0.6986	0.6326	0.2458	0.5352	0.5918	0.4551	0.3668	0.4692	0.3392	0.7565	0.4171	0.5774	0.4114	0.5521	0.3874	0.4582	0.8402	0.4553	0.5937	0.7133	0.7316	0.6003	0.4695	0.5884	0.4422	0.598	0.621	0.5233	0.5871
XRRA1_17786_AA	0.1718	0.2392	0.1888	0.3546	0.2469	0.46	0.3858	0.4097	0.4177	0.406049	0.2039	0.4372	0.2445	0.2921	0.413	0.5972	0.5455	0.1791	0.3177	0.6087	0.5219	0.4066	0.4362	0.5285	0.7523	0.2006	0.1962	0.2608	0.322	0.4255	0.395	0.4946	0.4918	0.3485	0.2623	0.2506	0.5764	0.4342	0.2911	0.3129	0.381	0.4906	0.474	0.3192	0.3504	0.5704	0.5884	0.5145	0.5832
CCDC90B_18086_AD	0.4397	0.3317	0.2654	0.4561	0.7955	0.5617	0.4575	0.7177	0.4141	0.7079	0.6211	0.5972	0.3592	0.5329	0.2756	0.6226	0.2312	0.3253	0.3072	0.6956	0.5427	0.4633	0.2589	0.6909	0.4819	0.5644	0.4495	0.3129	0.5164	0.3722	0.5097	0.379	0.5245	0.8393	0.5559	0.2857	0.7418	0.6132	0.4828	0.7856	0.7933	0.6151	0.4055	0.5908	0.7874	0.5754	0.7983	0.6701	0.4591
CREBZF_18138_AA	0.0752	0.0721	0.1966	0.049	0	0	0.0745	0	0.1471	0.4875	0.1747	0.2496	0	0.3913	0.4196	0.1334	0.0497	0.1969	0.192448	0.0663	0.2287	0.1546	0.1435	0.1833	0.1467	0.6709	0	0	0.2075	0.192448	0.3438	0.1855	0.0784	0	0.2729	0.2914	0.3074	0.1934	0.3625	0.8092	0	0.3101	0.3076	0.0853	0	0.1078	0.2048	0.1382	0.0513
SYTL2_18156_AD	0.0412	0.1821	0.4309	0.5538	0.6433	0.791	0.4161	0.3667	0.0515	0.2804	0.3406	0.4658	0.1222	0.1298	0.0607	0.6103	0.0922	0.1496	0.1512	0.552	0.3746	0.1051	0.3576	0.6355	0.3313	0.1669	0.7976	0.4772	0.0911	0.1931	0.1919	0.1539	0.1996	0.6452	0.7341	0.1113	0.5366	0.2746	0.3051	0.1761	0.7325	0.1967	0.5382	0.4432	1	0.2989	0.4123	0.639	0.8679
KIAA1731_18305_AA	0.3259	0.316466	0.5417	0.3424	0.3086	0.6171	0.2789	0.2353	0.3259	0.316466	0.3672	0.3559	0.4532	0.3373	0.2661	0.1577	0.1078	0.456	0.3053	0.4149	0.4085	0.2378	0.3403	0.22	0.1568	0.3128	0.3032	0.3334	0.3453	0.6592	0.392	0.3715	0.2438	0.1737	0.4755	0.2711	0.3982	0.5417	0.2724	0.3974	0.1717	0.3672	0.5059	0.3643	0.3495	0.2227	0.3353	0.2661	0.316466
TAF1D_18315_AA	0.7505	0.771478	0.6818	0.8272	0.7784	0.771478	0.771478	0.7962	0.7139	0.5992	0.771478	0.7724	0.7073	0.8271	0.771478	0.7492	0.6302	0.771478	0.7703	0.8272	0.7031	0.7743	0.5417	0.6606	0.8894	0.771478	0.6457	0.771478	0.7677	0.8641	0.822	0.641	0.8435	0.8592	0.7798	0.771478	0.8279	0.6728	0.8777	0.8685	0.8535	0.8306	0.817	0.7896	0.947	0.8794	0.768	0.6167	0.8593
TAF1D_18316_AD	0.8351	0.786823	0.7657	0.8343	0.8691	0.786823	0.786823	0.858	0.8632	0.7482	0.786823	0.768	0.7743	0.8801	0.786823	0.6739	0.7881	0.786823	0.6839	0.8387	0.6597	0.794	0.6094	0.7757	0.926	0.786823	0.6444	0.786823	0.7278	0.8474	0.7759	0.8029	0.8122	0.8651	0.7725	0.786823	0.8446	0.8035	0.9183	0.8529	0.8728	0.8631	0.8188	0.8388	0.9154	0.8715	0.7793	0.6769	0.8514
MRE11A_18339_AD	0.4944	0.4413	0.5038	1	0.392	0.7303	0.4744	0.6123	0.4916	0.471457	0.2598	0.4744	0.2131	0.4744	0.5505	0.4895	0.3449	0.392	0.471457	0.6123	0.8109	0.5301	0.471457	0.4744	0.6701	0.471457	0.471457	0.2653	0.471457	0.471457	0.1308	0.3672	0.7596	0.471457	0.7831	0.3607	0.311	0.4413	0.2416	0.471457	0.5301	0.392	0.2733	0.39	0.471457	0.4293	0.5038	0.7128	0.4832
ANKRD49_18345_AD	0.2261	0.6446	0.8626	0.7804	0.8479	0.797828	0.7939	0.822	0.511	1	0.8811	1	1	0.907	0.7234	0.9334	0.8165	0.794	0.797828	1	0.8287	0.5841	1	1	0.807	0.6612	0.6621	0.9035	1	0.645	0.7422	0.8812	0.795	0.865	1	0.9093	0.7643	0.8988	0.8724	0.8826	0.587	0.8613	0.9407	0.8329	1	0.9082	0.7918	0.6958	0.9111
ANKRD49_18352_AD	0.0896	0.079	0.3975	0.336	0.4218	0	0.3488	0.1563	0.0793	0.1757	0.4361	0.5314	0.4359	0.3891	0.276	0.3661	0.2669	0.4453	0.383891	0.4319	0.2563	0.226	0.2606	0.2308	0.399	0.2302	0.1313	0.5635	0.2286	0.3394	0.3968	0.3734	0.2031	0.3298	0.8409	0.5923	0.2816	0.2794	0.2669	0.5181	0.3194	0.2404	0.4996	0.5049	0.8312	0.4983	0.5459	0.3104	0.4896
ANKRD49_18354_AD	0.2848	0.0523	0.1435	0.1985	0.1801	0.2283	0.2287	0.069	0.1118	0	0.1248	0.204487	0	0.1298	0.1581	0.0688	0.0858	0.231	0.204487	0	0.1213	0.2556	0	0	0.2629	0.2197	0.3478	0.17	0.204487	0.3411	0.2036	0.1124	0.1032	0.1352	0.204487	0.1892	0.1864	0.0814	0.0678	0.1715	0.2632	0.0639	0.1058	0.2828	0.204487	0.1652	0.3132	0.1901	0.1323
CEP57_18391_AD	1	0.7358	0.9298	0.9357	0.855	0.7523	1	1	1	1	1	0.7926	0.922	0.9379	1	0.8464	0.8834	0.8796	0.7591	0.7857	0.734	0.8701	0.9002	0.8942	0.8819	1	1	0.872	1	0.8716	0.9256	0.9423	0.8366	0.9375	0.7748	1	0.9544	0.7378	0.9005	0.911	0.8633	1	0.7352	0.7578	0.9003	0.9408	0.738	0.6784	0.9279
CASP1_18541_AA	0.4551	0.653368	0.653368	0.5829	0.87	0.827	0.8734	0.8218	0.8662	0.653368	0.6342	0.309	0.5034	0.5463	0.6144	0.8098	0.5465	0.653368	0.496	0.4503	0.5145	0.7265	0.4543	0.8372	0.7068	0.6944	0.653368	0.653368	0.8391	0.6606	0.6636	0.8011	0.4291	0.745	0.8651	0.7805	0.5299	0.6508	0.6867	0.6895	0.653368	0.6212	1	0.653368	0.653368	0.5193	0.6055	0.6553	0.653368
PIH1D2_18719_AD	0.164	0.2983	0.2418	0.3104	0.2983	0.276067	0.4672	0.0599	0.4266	0.276067	0.2146	0.3894	0.4435	0.2293	0.2337	0.1882	0.276067	0.2581	0.276067	0.164	0.3129	0.5931	0.2293	0.3894	0.276067	0.276067	0.4335	0.4435	0.276067	0.276067	0.2671	0.2418	0.3129	0.0835	0.2418	0.5223	0.0738	0.1241	0.3147	0.2767	0.1882	0.0599	0.2418	0.367	0.276067	0.2146	0.0662	0.1541	0.3378
C11orf57_18728_AD	0.5051	0.6133	0.4474	0.5622	0.5285	0.5923	0.5971	0.5843	0.5349	0.4658	0.5036	0.5325	0.4033	0.4609	0.5807	0.6188	0.4105	0.576	0.2518	0.5874	0.4247	0.5069	0.4764	0.5635	0.5158	0.4387	0.3435	0.5797	0.4674	0.744	0.6215	0.4955	0.4282	0.5697	0.4549	0.6649	0.6485	0.4675	0.3317	0.4738	0.5535	0.4591	0.556	0.6048	0.4686	0.4789	0.5411	0.6904	0.7183
TMEM25_19017_AA	0.887233	0.887233	0.9242	0.8409	0.8692	0.8577	1	0.8995	0.7378	0.8184	0.8829	0.885	0.8045	1	0.887233	0.8434	1	1	0.887233	0.8807	1	0.8899	0.7295	1	1	0.6622	0.4586	1	0.6799	0.887233	0.8592	1	1	0.9073	0.8577	0.8518	1	0.769	0.7062	0.887233	1	1	1	0.9078	1	1	0.9282	0.8784	0.8492
CCDC84_19052_AD	0.4838	0.3359	0.1569	0.7369	0.5933	0.8634	0.4965	0.676	0.515	0.5483	0.7734	0.7914	0.7238	0.7668	0.4927	0.6588	0.7914	0.4974	0.685	0.7216	0.6217	0.8762	0.3128	0.6843	0.6676	0.4221	0.7453	0.7446	0.5323	0.7914	0.7343	0.6156	0.7356	0.715	0.5742	0.6093	0.8522	0.6731	0.3741	0.857	0.6455	0.8528	0.7521	0.6424	0.6916	0.7343	0.7478	0.7578	0.7166
TRAPPC4_19067_AD	0.7563	1	1	0.7555	0.7655	1	1	0.871911	1	0.871911	1	1	1	1	0.8128	0.8401	1	1	0.5933	0.741	0.6491	0.7961	0.89	0.2256	1	0.5652	0.883	1	1	1	1	1	1	0.5125	1	1	0.8615	0.4963	1	1	0.9106	0.9242	0.9159	0.8773	1	0.9118	0.9464	0.6322	0.6444
NLRX1_19129_AD	1	0.7809	1	0.871	0.7092	1	0.7763	0.8243	1	1	0.9019	0.6925	1	1	1	0.6983	1	0.8491	0.839049	1	0.5296	1	1	0.7441	1	1	0.839049	0.8448	1	0.6523	1	0.7194	0.6633	1	0.5153	0.7028	1	1	0.6406	1	0.7559	0.6633	1	0.5899	0.839049	0.7809	1	0.9102	0.6864
NLRX1_19130_AD	0.5356	0.487	0.5356	0.6976	0.4347	0.7712	0.7852	0.3567	0.6452	1	0.6192	0.6804	0.6149	0.5291	0.8541	0.5225	0.7055	0.5709	0.647404	0.6082	0.5156	0.6507	0.5156	0.5789	0.3898	1	0.647404	0.9229	0.5626	0.4701	0.7454	0.6484	0.8059	0.7961	0.5238	0.7988	0.6804	0.5867	0.6349	1	0.8541	0.7884	0.5291	0.6711	0.647404	0.7843	0.5356	0.4606	0.5225
TMEM136_19161_AA	0.2865	0.319	0.2102	0.2688	0.6605	0.3273	0.2517	0.7218	0.6105	0.2128	0.6337	0.3881	0.4308	0.4971	0.4478	0.4006	0.3934	0.5149	0.1778	0.894	0.5506	0.4739	0.4422	0.3173	0.4308	0.2777	0.4188	0.5506	0.3621	0.503178	0.4789	0.6726	0.4013	0.704	0.3019	0.4971	0.5067	0.4739	0.1981	0.206	0.5256	0.6132	0.54	0.6105	0.8	0.6278	0.6942	0.4153	0.6838
TMEM218_19279_AA	0.1261	0.3107	0	0.0543	0.156216	0.156216	0.0802	0.1166	0.0493	0.5365	0.0307	0.3021	0.1659	0.1153	0.0797	0.1162	0.1834	0.0757	0.156216	0.156216	0.156216	0.1584	0.1657	0	0.2172	0.1867	0.156216	0.1911	0.2056	0.1938	0.156216	0.0737	0.2361	0.0872	0.3109	0.1501	0.1735	0.2557	0.0707	0.3659	0	0.1372	0	0.2326	0.5694	0.1373	0.2018	0.2651	0.1005
TMEM218_19280_AD	0.3634	0.4453	0.1244	0.4698	0.5667	0.6555	0.4634	0	0.4073	0.6856	0.3051	0.4322	0.6142	0.2939	0.4985	0.2939	0.4453	0.3418	0.6046	0.7885	0.453736	0.3915	0.4063	0.6689	0.763	0.2924	0.2972	0.4027	0.353	0.5725	0.6242	0.4159	0.453736	0.3934	0.5246	0.3357	0.5203	0.3307	0.4605	0.6261	0.4164	0.3258	0.526	0.737	0.8263	0.6692	0.5529	0.6794	0.1599
NFRKB_19462_AA	0.6543	0.1622	0.5156	0.2003	0.1622	0.3782	0.3364	0.3509	0.3474	0.2986	0.218	0.2102	0.2619	0.3782	0.4151	0.3898	0.5317	0.3011	0.372685	0.4423	0.2398	0.2211	0.6543	0.2885	0.1792	0.3621	0.372685	0.2301	0.372685	0.5609	0.5867	0.3649	0.1507	0.2051	0.3364	0.6395	0.3984	0.3111	0.3133	0.6235	0.4347	0.3557	0.3269	0.4756	0.2986	0.2945	0.3696	0.3782	0.4052
RAD52_19642_AA	0.3017	0.447	0.5116	0.2157	0.2739	0.267344	0.1522	0.4051	0.2953	0.267344	0.2391	0.3438	0.0882	0.2249	0.1632	0.2486	0.2391	0.2237	0.267344	0.2739	0.386	0.6831	0.267344	0.557	0.2739	0.1732	0.1908	0.3501	0.1463	0.267344	0.3137	0.1358	0.386	0.186	0.4142	0.2391	0.2789	0.2821	0.2391	0.2391	0.4112	0.386	0.2878	0.2821	0.2953	0.2801	0.5053	0.557	0.0402
RAD52_19644_AD	0.3158	0.2814	0.4706	0.2988	0.1333	0.303711	0.1914	0.2022	0.2909	0.303711	0.2353	0.48	0.1333	0.3158	0.2353	0.2571	0.2697	0.1592	0.303711	0.3213	0.1437	0.4293	0.303711	0.2353	0.3053	0.303711	0.303711	0.3636	0	0.2353	0.303711	0.2148	0.2087	0.2778	0.2212	0.3536	0.4583	0.1096	0.2087	0.6061	0.3053	0.4293	0.3259	0.2909	0.4348	0.3424	0.381	0.3011	0.4017
VAMP1_19866_AA	0.3369	0.3313	0.0831	0.6647	0.3628	0	0.2479	0.2244	0.167575	0.0371	0	0.167575	0.2298	0.3683	0.167575	0.059	0.167575	0.1372	0.167575	0.2789	0.1952	1	0.167575	0.4604	0.167575	0.2293	0	0.167575	0	0.142	0.0763	0.0913	0	0.1636	0	0	0.2926	0.5654	0.5941	0.2171	0.1175	0.2261	0.3272	0.1902	0	0.4595	0.0467	0.167575	0.3481
VAMP1_19867_AA	0.8243	0.4601	0.3809	0.390953	0.7295	0	0.2468	0.5523	0.5743	0.2584	0.2088	0.6863	0.4346	0.2262	0.5435	0.3264	0.390953	0.2179	0.4595	0.4162	0.1997	0.390953	0.7287	0.390953	0.6425	0.447	0.2849	0.9196	0.7296	0.387	0.5119	0.3089	0	0.4177	0.2373	0.1923	0.390953	0.3665	0.5593	0.2954	0	0.0958	0.5598	0.4861	0.5801	0.775	0.2628	0.5363	0.390953
NOP2_19895_AD	0.1892	0.1293	0.1184	0.2274	0.1903	0.4385	0.2268	0.234	0.1447	0.1236	0.22	0.2733	0.22	0.2909	0.2165	0.2919	0.311	0.3329	0.3607	0.4583	0.23	0.3607	0.311	0.1634	0.2438	0.1583	0.2733	0.1583	0.2909	0.1583	0.1746	0.2098	0.2674	0.1236	0.4783	0.3969	0.4519	0.3882	0.34	0.2529	0.2593	0.3969	0.3767	0.3172	0.5752	0.3323	0.3063	0.2794	0.2386
ZNF384_19927_AD	0.2526	0.3561	0.2576	0.2985	0.5196	0.6187	0.3561	0.302	0.0923	0.2694	0.4088	0.2823	0.2842	0.3806	0.3206	0.3589	0.3738	0.2278	0.330267	0.1517	0.2753	0.211	0.4441	0.235	0.4441	0.1605	0.330267	0.6711	0.330267	0.4534	0.298	0.2847	0.3107	0.2468	0.2085	0.4625	0.338	0.4367	0.3184	0.2694	0.2039	0.4553	0.2938	0.3121	0.4244	0.4033	0.344	0.4541	0.4393
GPR162_19973_AD	0.7823	0.6637	1	0.8368	0.8566	1	1	1	1	0.65	0.629	0.8674	0.629	1	0.5977	0.8134	1	1	1	0.8945	0.7888	0.8945	0.6421	0.5785	1	0.7188	1	0.8954	0.6651	1	0.8076	1	1	0.6657	1	0.775	1	0.8312	1	0.7123	0.5856	0.7795	0.9182	1	0.8368	0.9242	0.7747	1	0.835961
PEX5_20092_AD	0.2391	0.0827	0.2308	0.1487	0.189	0.0914	0.1729	0.1669	0.1549	0.1682	0.1713	0.3227	0.2623	0.1707	0.2113	0.1638	0.1371	0.1545	0.2052	0.6462	0.15	0.1371	0.1077	0.2106	0.3557	0.1065	0.1198	0.2481	0.0799	0.3405	0.349	0.1452	0.2223	0.1981	0.4547	0.0962	0.2481	0.1013	0.0414	0.5324	0.2337	0.2734	0.2175	0.1648	0.6737	0.2223	0.4377	0.0767	0.0621
CD163_20098_AA	0.3787	0.5072	0.4617	0.3811	0.4188	0.4121	0.3237	0.4154	0.3579	0.1464	0.2554	0.4471	0.3983	0.348	0.4069	0.2971	0.4855	0.442446	0.4375	0.4634	0.4081	0.3818	0.4666	0.3059	0.3741	0.3444	0.3448	0.442446	0.3419	0.3758	0.369	0.3023	0.4268	0.3581	0.3525	0.3398	0.4867	0.3935	0.34	0.542	0.3897	0.3715	0.486	0.3602	0.5627	0.2829	0.3661	0.4399	0.3398
CLEC2D_20234_AD	0.5235	1	1	0.7289	0.6638	0.4243	1	0.7818	1	0.847521	1	0.824	0.5028	1	1	0.7512	0.8364	1	0.6408	0.6874	0.7015	0.925	1	0.6806	0.6466	0.7966	1	0.9314	1	0.665	1	1	0.5443	0.8269	1	1	0.854	1	0.5788	0.8797	0.9061	0.8754	1	0.8078	0.9493	0.7876	0.8546	1	1
CLEC2D_20236_AD	0.418421	1	0.5199	0.2459	0.1086	0.6069	0.8402	0.3409	0.7516	0.1195	0.4801	0.4352	0.2325	0.7161	0.6601	0.2587	0.2257	0.7052	0.0399	0.3764	0.3832	0.7634	1	0.3653	0.2408	0.418421	0.418421	0.7358	0.1891	0.2881	0.4775	0.3458	0.4739	0.366	0.6444	0.6929	0.4953	0.2499	0.2207	0.4523	0.2866	0.2918	0.5729	0.1434	0.5909	0.5362	0.5063	0.4223	0.3433
GABARAPL1_20354_AD	0.586319	0.0973	0.7162	0.236	0.4036	0.586319	0.6444	0.2861	0.586319	0.586319	0.6272	0.5007	0.5641	0.4753	0.66	0.5444	0.6462	0.6089	0.586319	0.7492	0.7564	0.4231	0.4569	0.7625	0.6735	0.1607	0.3178	0.4753	0.4753	1	0.6304	0.7905	0.6693	0.7235	0.8183	0.6631	0.6925	0.2227	0.4126	1	0.6272	0.3267	0.7109	0.7109	1	0.7526	0.5129	1	0.1938
EMP1_20538_AA	0.1099	0.6362	0.404368	0.3262	0.3763	0.3037	0.6371	0.1002	0.5175	0.404368	0.7608	0.4493	0.2717	0.2901	0.4739	0.0999	0.4161	0.293	0.404368	0.4654	0.0789	0.4081	0.2432	0.4531	0.0635	0.4885	0	0.1373	0.196	0.4383	0.6228	0.8605	0.6211	0.3207	0.4092	0.8363	0.5965	0.603	0.0827	0.4229	0.4676	0.1172	0.323	0.4278	0.3617	0.7467	0.2237	0.8362	0.4728
LMO3_20630_AD	0.5036	0.6911	0.602	0.4546	0.5254	0.5572	0.6332	0.6106	0.5961	0.5679	0.6595	0.5941	0.4902	0.6343	0.8845	0.532	0.8737	0.8232	0.592052	0.6466	0.3768	0.5822	0.592052	0.6358	0.5069	0.5805	0.4045	0.6204	0.3446	0.2493	0.578	0.6303	0.5322	0.5845	0.5408	0.6474	0.5952	0.61	0.4476	0.5679	0.7388	0.5512	0.5802	0.6637	0.5915	0.6869	0.6943	0.5254	0.5792
SSPN_20847_AD	0.8371	0.69	0.4954	0.8228	0.4802	0.8386	0.5155	0.6437	0.7638	0.746456	0.6841	0.834	0.8472	0.7551	0.7349	0.7803	0.6841	0.9135	1	0.224	0.4833	0.7994	0.8661	0.6092	0.776	0.8681	0.8983	0.949	1	0.5651	0.634	0.6948	0.908	0.6752	0.8618	0.8804	0.9001	0.7176	0.5397	1	0.5809	0.5595	0.7254	0.8584	1	0.6858	0.7408	0.592	0.4356
CAPRIN2_20942_AA	0.5742	0.8735	0.8524	0.7646	0.83151	0.5601	0.876	0.7747	0.7564	0.83151	0.9523	0.7941	0.9403	0.8341	0.8651	1	0.83151	0.9068	1	0.7628	0.4743	0.7255	0.8085	0.9092	0.7005	0.8039	1	0.7951	0.8418	0.83151	0.9148	0.9043	0.9336	1	0.8386	0.8509	0.7956	0.7709	0.8419	0.9021	0.7206	0.8287	0.7422	0.7338	0.83151	0.8476	0.7085	0.6913	1
CAPRIN2_20943_AA	0.6386	0.8784	0.6708	0.6947	0.9094	0.7271	0.8328	0.878	0.8202	0.840548	0.8751	0.6977	0.840548	0.8803	0.8638	1	0.7483	0.8878	0.840548	0.6518	0.7365	0.735	0.8855	0.8755	0.8304	0.842	1	0.8771	0.9182	0.7621	0.882	0.8312	0.8985	1	0.9607	0.83	0.6204	0.6096	0.8869	0.8787	0.79	0.6556	0.7505	0.8967	0.9449	0.872	0.8369	0.3709	1
DDX11_20971_AA	0.1879	0.3884	0.6334	0.1744	0.3992	0.0468	0.068	0.1011	0.197	0.2126	0.2543	0.2759	0.1684	0.3016	0.1504	0.196	0.2647	0.2894	0.1336	0.1879	0.0975	0.1901	0.0975	0.1776	0.1466	0.2063	0.2395	0.1759	0.174	0.2819	0.2565	0.3716	0.1283	0.1525	0.0455	0.1316	0.175	0.5618	0.3292	0.3506	0.1448	0.3876	0.3326	0.2691	0.4426	0.553	0.2988	0.0767	0.1879
DDX11_20974_AA	0.3537	0.1338	0.3788	0.0987	0.3149	0.1234	0.1161	0.158	0.1161	0.183614	0.0951	0.2827	0.141	0.3649	0.0572	0.0759	0.1796	0.3079	0.068	0.2055	0.0805	0.1215	0	0.0334	0.2637	0.183614	0.183614	0.2729	0	0.2259	0.33	0.1796	0.3193	0.2569	0.1703	0.1728	0.321	0.2472	0.0647	0.4578	0.2654	0.2373	0.5563	0.2637	0.5677	0.6365	0.2367	0.0987	0
YAF2_21118_AA	1	0.7619	0.898	1	0.8421	0.908514	0.6753	1	0.7761	1	0.908514	0.8193	1	0.7619	0.7692	0.8855	1	1	0.908514	0.8855	1	0.908514	0.908514	1	0.7761	1	0.1379	0.8052	0.8352	0.908514	0.8544	0.918	0.908514	1	0.908514	1	0.7458	1	0.7692	1	0.8598	0.7805	0.898	0.874	1	0.9102	0.7134	1	1
YAF2_21130_AA	0.3713	0.4288	0.8611	0.2758	0.6632	0.482691	0.5413	0.3401	0.482691	0.482691	0.5083	0.6116	0.482691	0.5255	0.3713	0.4078	0.8052	0.4788	0.482691	0.4406	0.5415	0.482691	0.3713	0.7026	0.228	0.482691	0.482691	0.7338	0.228	0.482691	0.8666	0.5962	0.6841	0.3298	0.3217	0.4915	0.8187	0.3083	0.7151	0.7561	0.482691	0.5536	0.5612	0.7266	0.647	0.4216	0.7613	0.6079	0.507
PPHLN1_21220_AA	0.720413	0.6513	0.9257	0.7888	0.6427	0.4536	0.8925	0.7493	0.3325	0.720413	0.5546	0.8737	0.6241	0.5873	0.4536	0.7925	0.6888	0.8328	0.882	0.8059	0.8437	0.6834	0.7527	0.7569	0.5805	0.7888	0.720413	0.8875	0.7888	0.720413	0.9208	0.7135	0.6241	0.720413	0.5923	0.7792	0.5546	0.9573	0.8416	0.720413	0.8328	0.8328	0.8247	0.8691	0.8437	0.7478	0.7135	0.7792	0.8857
SLC38A1_21328_AD	0.8427	0.5654	0.528407	0.3557	0.5529	0.6103	0.444	0.5453	0.4116	0.4718	0.4477	1	0.7121	0.5075	0.5774	0.448	0.6002	0.5096	0.528407	0.4673	0.5137	0.3821	0.7282	0.5157	0.5739	1	0.528407	0.6072	0.528407	0.528407	0.5408	0.3985	0.3821	0.5906	0.528407	0.464	0.7596	0.6568	0.9027	0.528407	0.6404	0.5137	0.388	0.4248	0.528407	0.335	0.7002	0.5097	0.4964
PFKM_21421_AD	0.3456	0.6627	0.8722	0.2932	0.666	0.1207	0.4006	0.4584	0.6974	0.5207	0.7127	0.6232	0.365	0.5824	0.4883	0.4284	0.4102	0.604	0.7149	0.6105	0.2973	0.5966	0.4058	0.3131	0.6474	0.3022	0.242	0.8225	0.3752	0.7708	0.7402	0.7004	0.7472	0.583	0.405	0.8389	0.6633	0.7133	0.3087	0.8026	0.2118	0.8493	0.6384	0.4253	0.829	0.7202	0.5893	0.3056	0.3215
SLC11A2_21739_AD	0.3984	0.4103	0.2746	0.3364	0.4478	0.3808	0.3496	0.4121	0.3212	0.2885	0.3655	0.3446	0.4599	0.3375	0.2816	0.4793	0.5034	0.3212	0.398406	0.4125	0.3941	0.5867	0.2255	0.4514	0.3095	0.3941	0.398406	0.3095	0.398406	0.3212	0.4409	0.2986	0.3716	0.4409	0.5489	0.3655	0.5939	0.3338	0.5516	0.256	0.3389	0.5047	0.3095	0.5054	0.398406	0.393	0.2467	0.3212	0.4862
LETMD1_21796_AD	0.3459	0.5135	0.5043	0.2677	1	0.456287	0.4174	0.2868	0.17	0.456287	0.6838	0.2508	0.456287	0.8505	0.4592	0.3953	0.4864	0.478	0.456287	0.6809	0.5868	0.4408	0.456287	0.3186	0.3078	0.456287	0.2336	0.913	0.456287	1	0.7245	0.5694	0.3558	0.3946	0.1074	0.6468	0.5808	0.722	0.0975	0.353	0.6199	0.3586	0.6494	0.3061	0.8398	0.6481	0.8564	0.2539	0.2258
CSAD_21953_AD	0.1897	0.135	0.2806	0.3708	0.3843	0.2378	0.1722	0.4951	0.3843	0.399734	0.4713	0.4663	0.4163	0.3987	0.375	0.3568	0.399734	0.3997	0.399734	0.4071	0.1577	0.3545	0.2629	0.5053	0.4618	0.1722	0.4213	0.541	0.3843	0.3843	0.5316	0.4542	0.254	0.5368	0.8022	0.4415	0.5431	0.2282	0.5786	0.3722	0.4542	0.5148	0.516	0.4741	0.5266	0.4163	0.5552	0.4213	0.5929
PFDN5_21993_AA	0.636134	0.8964	0.652	0.7834	0.6977	0.636134	0.545	0.5893	0.6443	0.603	0.5771	0.7612	0.6622	0.6919	0.6607	0.5574	0.636134	0.7224	0.6822	0.6845	0.2631	0.636134	0.753	0.6395	0.5014	0.7646	0.5874	0.6264	0.6084	0.636134	0.7763	0.4858	0.4712	0.7039	0.7335	0.6765	0.636134	0.7065	0.5513	0.3925	0.4001	0.5252	0.5929	0.6698	0.5607	0.5971	0.4676	0.4588	0.5371
PRR13_22035_AA	0.749243	0.749243	0.7628	0.749243	0.2661	0.8848	1	0.5877	0.6071	0.749243	0.7545	0.4757	0.9054	0.6124	0.749243	0.687	0.586	0.8078	1	0.7751	0.9473	0.749243	0.749243	0.7792	0.2368	0.7701	0.7749	1	0.7699	0.749243	0.749243	0.749243	0.4887	0.798	0.749243	0.5911	0.749243	0.7208	0.5938	0.769	0.9396	0.7758	0.8397	0.8798	0.749243	0.7821	0.749243	0.4749	0.7133
PRR13_22036_AA	0.746	0.80263	0.80263	0.8039	0.7877	0.9274	1	0.7555	0.7441	0.9022	0.8861	0.602	0.836	0.7522	0.5515	0.7988	0.80263	0.8192	1	0.8874	0.9108	0.79	0.80263	0.8524	0.6109	0.887	0.7784	1	0.6339	0.8311	0.5696	0.7977	0.806	0.8113	0.8254	0.8229	0.8562	0.5682	0.8483	0.8704	0.8918	0.8683	0.9154	0.8923	0.8446	0.8436	0.8772	0.8006	0.80263
SMUG1_22132_AD	0.187953	0.187953	0.759	0.0527	0.4575	0.8181	0	0.1192	0.3599	0.187953	0.187953	0.4455	0.4575	0	0.2195	0.3712	0.3822	0.4838	0.2494	0.2028	0.126	0.1578	0.2195	0.187953	0.098	0.3961	0.187953	0.1781	0.1128	0.187953	0.1032	0	0.238	0.187953	0.2494	0.1644	0.1794	0.4029	0	0	0	0.3822	0.1466	0.1095	0.4257	0.3383	0	0.187953	0.187953
RDH5_22237_AA	0.702664	0.5822	0.702664	0.6221	0.7585	0.6344	0.702664	0.6691	0.702664	0.6536	0.702664	0.6988	0.5968	0.4225	1	0.7117	0.702664	0.702664	0.702664	0.7958	0.7235	0.6435	0.702664	0.7107	0.5086	0.7712	0.5063	1	0.702664	0.702664	0.702664	0.7189	0.7237	0.6498	0.5856	1	0.8236	0.7672	0.8099	0.6551	0.5938	0.5755	0.7137	0.8085	0.4582	0.7434	0.7039	0.6464	0.6176
CDK2_22323_AD	1	0.6051	1	0.6981	1	1	1	1	1	1	1	1	1	1	1	1	1	1	0.928778	1	1	1	1	1	0.9198	1	1	1	0.928778	1	1	0.7714	1	1	1	0.9385	1	1	0.8728	0.9062	0.8689	1	1	0.9061	1	1	1	1	0.6482
GLS2_22441_AA	0.1855	0.1327	0.247	0.1223	0.0563	0	0.1586	0.0865	0.1541	0	0.2146	0.0648	0.0919	0.1083	0.4022	0.1102	0.116961	0.2329	0.116961	0.1336	0.064	0.0411	0.116961	0.0398	0.0518	0.064	0	0.2226	0.093	0.1202	0.1351	0.238	0.1541	0.0154	0.0495	0.3534	0.2265	0.1541	0.046	0.2433	0.1055	0.1753	0.1855	0.114	0.116961	0.1794	0.3346	0.112	0.0263
NACA_22488_AD	0.08	0.1806	0.1881	0.0924	0.129	0.1821	0.1863	0.1347	0.1868	0.0328	0.156	0.1742	0.0791	0.2532	0.2893	0.1507	0.3523	0.3767	0.0386	0.3183	0.0684	0.0483	0.0554	0.1175	0.4169	0.0954	0.0229	0.1495	0.0257	0.3741	0.2719	0.2195	0.0616	0.1419	0.1282	0.4277	0.3994	0.2967	0.1467	0.3047	0.1152	0.2641	0.3402	0.0372	0.1495	0.4839	0.5469	0.1686	0.1349
DDIT3_22626_AA	0	0	0	0	0.0843	0	0.0867	0	0.0986	0	0.5814	0	0	0.0559	0.0389	0.0263	0	0.0799	0	0.0873	0.1057	0	0	0	0	0.4101	0	0.0736	0	0	0	0.1162	0	0	0.0921	0.4307	0	0.112	0	0.2704	0.0748	0.0766	0.1095	0	0.1328	0.4599	0	0.1564	0.136
DTX3_22660_AA	0.0688	0.1869	0.3243	0.1257	0.1639	0.4937	0.2702	0.224	0.0399	0.0343	0.1997	0.3437	0.1932	0.3156	0.2206	0.1923	0.2625	0.2372	0.0742	0.342	0.2304	0.1577	0.0688	0.167	0.3819	0.1425	0.0533	0.3737	0.0039	0.1908	0.3677	0.2949	0.2577	0.2772	0.1758	0.4408	0.3685	0.1579	0.1947	0.4248	0.1651	0.3257	0.4568	0.3268	0.4011	0.466	0.4321	0.1991	0.0884
DTX3_22661_AD	0.3152	0.2732	0.5544	0.3529	0.4734	0.7898	0.4464	0.4539	0.3282	0.4974	0.3294	0.5606	0.4283	0.62	0.4071	0.5139	0.3082	0.4565	0.3135	0.5657	0.4695	0.5079	0.2888	0.5057	0.6975	0.3837	0.342	0.5935	0.3028	0.5149	0.5715	0.6874	0.5851	0.7085	0.4992	0.7243	0.7367	0.4759	0.2596	0.689	0.4249	0.6348	0.7165	0.651	0.8282	0.7651	0.6916	0.368	0.4593
TMEM5_22853_AD	0.8338	0.7616	0.8638	0.7137	0.8699	0.8446	0.7103	0.7226	0.8869	0.715	0.7512	0.7853	0.7804	0.6742	0.8223	0.6258	0.9067	0.8394	0.5564	0.6715	0.6379	0.7989	0.5077	0.6611	0.7931	0.5458	0.4502	0.8988	0.7853	0.8855	0.7528	0.7812	0.7331	0.8009	0.6105	0.9049	0.8797	0.5791	0.7781	0.6764	0.6636	0.6611	0.6399	0.8026	0.8644	0.6764	0.8173	0.7131	0.7913
TMBIM4_22897_AD	0.450372	0.5222	0.2754	0.6476	0.2072	0.6311	0.2754	0.2526	0.450372	0.4873	0.3878	0.3818	0.3072	0.5111	0.6861	0.5709	0.3433	0.4063	0.450372	0.2754	0.7196	0.5034	0.450372	0.5328	0.5589	0.3221	0.2218	0.4771	0.1964	1	0.3133	0.4468	0.2072	0.311	0.7525	0.3364	0.6436	0.3818	0.6765	0.1062	0.4995	0.4419	0.2754	0.2379	0.4215	0.5328	0.6662	0.3364	0.1445
MDM1_22925_AD	0.402	0.5218	0.4715	0.6676	0.4727	0.5184	0.7013	0.7279	0.5968	0.685561	0.8125	1	0.9083	0.7192	0.6035	0.7614	0.8704	0.7758	0.685561	0.5956	0.3184	0.7004	0.8679	0.8644	0.5441	0.4045	0.685561	0.3606	0.4559	0.6765	0.7094	0.5916	0.8319	0.7166	0.2987	0.8563	0.6992	0.685561	0.5433	0.3886	0.5897	0.6424	0.8852	0.6387	0.2058	0.8868	0.8863	0.6573	0.4071
RAB3IP_23354_AD	0.1447	0.0652	0.0956	0.0932	0.0918	0.0754	0.1165	0.0466	0.0907	0.0816	0.1056	0.103	0.0884	0.1344	0.1329	0.0956	0.3698	0.1188	0.2499	0.1176	0.0978	0.0794	0.0351	0.0881	0.0927	0.0805	0.0612	0.1817	0.1554	0.2124	0.1496	0.1276	0.2367	0.0585	0.0967	0.3852	0.1798	0.2045	0.073	0.1969	0.0514	0.1546	0.1536	0.0956	0.1877	0.1383	0.1741	0.1082	0.0748
UBE2N_23687_AD	1	0.5857	1	0.8438	0.7764	1	1	1	0.839	0.940643	0.825	1	1	0.9281	0.9502	0.8108	1	1	1	1	0.7097	1	1	1	1	1	0.940643	1	1	0.7299	1	1	1	0.7745	1	1	0.9048	1	0.9192	0.9195	1	1	0.9175	1	1	0.8287	1	1	1
SLC25A3_23856_AD	0.2794	0.2131	0.3734	0.2821	0.3249	0.2372	0.2039	0.2424	0.264	0.1864	0.2282	0.3305	0.2746	0.3723	0.3257	0.3219	0.2558	0.3345	0.167	0.534	0.4451	0.4348	0.1209	0.3208	0.1989	0.234	0.0485	0.3305	0.211	0.2245	0.3514	0.3143	0.2895	0.3693	0.4106	0.4961	0.5212	0.2583	0.4388	0.3419	0.3727	0.4044	0.5702	0.4573	0.7078	0.6926	0.5373	0.2	0.3056
TXNRD1_24112_AD	0.3298	0.2334	0.2529	0.3363	0.6842	0.3926	0.3623	0.4312	0.3961	0.3367	0.1876	0.4413	0.2381	0.3644	0.3936	0.5083	0.5439	0.3603	0.405499	0.1761	0.4572	0.3023	0.5492	0.4333	0.1509	0.5582	0.405499	0.3495	0.405499	0.3914	0.4236	0.2336	0.1901	0.6412	0.405499	0.5171	0.2582	0.5681	0.3277	0.3513	0.4467	0.6317	0.3786	0.3277	0.405499	0.4744	0.2287	0.2818	0.4037
CHST11_24115_AD	0.601973	0.4473	0.603	0.5447	0.601973	0.601973	0.4159	0.601973	0.6627	0.601973	0.6308	0.7736	0.5992	0.606	0.5922	0.6748	0.7193	0.7014	0.5325	0.5235	0.5292	0.7621	0.8567	0.5164	0.475	0.6613	0.601973	0.7193	0.406	0.4723	0.601973	0.6134	0.601973	0.601973	0.7494	0.5402	0.4409	0.7995	0.5325	0.7995	0.4607	0.5992	0.5875	0.601973	0.2217	0.4607	0.695	0.268	0.601973
ISCU_24227_AA	1	1	1	1	1	0.943328	1	1	0.824	1	1	1	1	1	1	1	1	0.8521	0.943328	1	1	0.8294	0.943328	1	0.8908	1	1	1	0.7724	1	1	0.7928	1	0.7675	0.8423	1	0.8948	1	0.8486	1	1	1	1	1	1	1	1	1	1
UBE3B_24313_AA	0.2237	0.0845	0.0619	0.054	0.1916	0.0473	0.147	0.0545	0.1751	0.5285	0.0936	0.1376	0.1408	0.1931	0.094	0.0917	0.0336	0.1262	0.8597	0.0705	0.1284	0.1704	0.4506	0.1431	0.2139	0.5523	0.8831	0.1757	0.82	0.2417	0.2947	0.1352	0.2899	0.1576	0.2744	0.2976	0.1208	0.1203	0.1137	0.3807	0.0762	0.1866	0.1214	0.1062	1	0.0764	0.1194	0.035	0.0485
UBE3B_24315_AD	0.9216	0.838	0.6842	0.7924	0.654	0.7667	0.8324	0.7981	0.8561	0.7292	0.9471	0.6179	0.6819	0.9579	0.9112	0.7368	0.8895	0.8679	0.6465	0.7755	0.8408	0.8404	0.7994	0.7878	0.7253	0.7239	0.9345	0.7594	1	0.6611	0.9272	0.7965	0.7332	0.6794	0.6973	0.7376	0.7539	0.8977	0.6633	0.9254	0.7755	0.7957	0.6979	0.7793	0.753	0.7239	0.7994	0.7596	0.8102
GLTP_24360_AD	0.883	1	1	1	0.8525	0.7797	0.8094	0.9233	0.8444	1	1	0.8415	1	0.7541	1	0.7853	1	0.8892	0.872509	1	1	0.7676	0.8444	1	0.8499	1	0.8094	1	1	0.872509	1	0.739	0.7541	1	0.7676	0.6537	0.739	1	0.6389	1	0.6229	0.6053	1	0.8797	0.872509	0.7541	1	0.6337	0.8176
GIT2_24375_AA	0.275	0.2353	0.4397	0.5535	0.4566	0.4905	0.3364	0.4058	0.1622	0.5038	0.232	0.609	0.5125	0.413	0.2053	0.3939	0.4609	0.3299	1	0.4059	0.4107	0.4775	0.5228	0.3466	0.6048	0.6341	0.8113	0.5575	0.7742	0.6471	0.5771	0.3676	0.5657	0.7601	0.5232	0.3067	0.4974	0.3528	0.5125	0.5545	0.391	0.3901	0.411	0.3232	0.7954	0.4855	0.4129	0.2561	0.3187
IFT81_24411_AD	0.3965	0.4802	0.6957	0.4733	0.6462	0.627	0.4524	0.5175	0.4579	0.6349	0.6878	0.5684	0.6515	0.4856	0.5129	0.473	0.4721	0.3633	0.511301	0.439	0.7645	0.2777	0.3285	0.5767	0.6057	0.6987	0.5965	0.439	0.7579	0.5818	0.6	0.5556	0.3562	0.5369	0.3114	0.5619	0.6892	0.495	0.5041	0.4579	0.682	0.4129	0.5202	0.3463	0.6786	0.5054	0.4773	0.5592	0.655
RAD9B_24448_AA	1	1	1	1	1	1	1	1	1	0.943909	1	1	1	0.5288	1	1	0.943909	0.6763	1	1	1	1	1	1	1	1	0.6191	1	1	0.943909	1	0.5288	1	1	1	1	1	1	0.6843	1	1	1	0.5015	0.7463	1	0.943909	1	1	1
OAS1_24603_AA	0.7936	0.6769	0.8098	1	0.9846	0.962	0.6679	0.726	1	0.9298	1	1	0.9489	0.7629	0.9789	0.9609	0.987	0.8864	0.9806	0.9593	0.8305	1	0.9327	0.9642	1	0.9771	0.6235	0.7283	1	0.9837	0.7574	0.7312	1	0.8912	0.9772	0.9065	0.9881	1	0.9677	0.9419	0.8665	0.9158	0.9796	0.7785	1	0.9807	0.9304	0.9902	0.963
IQCD_24626_AA	0.6537	0.4385	0.5813	0.5485	0.3874	0.6286	0.2066	0.406	0.494	0.5656	0.6888	0.4916	0.765	0.9312	0.6756	0.6613	0.4098	0.4385	0.5888	0.3846	0.6345	0.5339	0.6756	0.6286	0.4245	0.4884	0.8112	0.5395	0.4916	0.54205	0.5301	0.3821	0.8064	0.4519	0.5101	0.6583	0.5395	0.6845	0.5656	0.5555	0.4583	0.3424	0.4884	0.5434	0.5775	0.4245	0.5339	0.5775	0.3731
FBXW8_24672_AD	0.6829	0.7547	0.684657	0.48	0.5714	1	0.6176	0.7869	0.8713	0.684657	0.8395	0.7347	0.684657	0.5301	0.6255	0.7737	0.684657	0.8312	0.684657	0.7347	0.8	0.4179	0.684657	0.684657	0.7111	0.684657	0.684657	0.885	0.684657	0.684657	0.7547	0.381	0.7347	0.339	0.4507	0.5638	0.7547	0.4507	1	0.7347	0.6286	0.8	1	0.7347	0.684657	0.5517	0.4678	0.5752	0.8091
RFC5_24684_AD	0.7481	0.7782	0.7782	0.5618	0.4475	0.60808	0.7392	0.4858	0.8019	0.4475	0.637	0.4807	0.5391	1	0.8613	0.4736	1	0.369	0.60808	0.8586	0.3311	0.5343	0.60808	0.5391	0.503	0.60808	0.60808	0.526	0.60808	0.4475	0.8663	0.5539	0.60808	0.7782	0.60808	0.8437	0.7159	0.7782	0.6183	0.6183	0.3506	0.6742	0.5744	0.4082	1	0.8368	0.759	0.6428	0.3864
RPLP0_24727_AA	0.1619	0.3526	0.2204	0.4369	0.6431	0.5568	0.3168	0.3718	0.1727	0.2341	0.3134	0.4631	0.3768	0.5653	0.5455	0.2328	0.6653	0.6937	0.2341	0.6439	0.4723	0.5808	0.4124	0.3925	0.2367	0.3112	0.4823	0.4542	0.1967	0.4649	0.6547	0.295	0.1924	0.5279	0.4416	0.5834	0.3766	0.452283	0.452283	0.6776	0.4154	0.694	0.8703	0.4034	0.4469	0.6367	0.4678	0.2779	0.452283
RPLP0_24734_AA	0.8455	0.7081	0.807	0.7874	0.8925	0.8228	0.8987	1	1	0.8238	0.8804	0.8208	0.8936	0.8776	0.8664	0.8861	0.9103	0.9088	0.9004	0.6592	0.9666	0.9141	0.9124	0.8773	0.9149	0.8946	0.8416	0.8916	0.9553	0.9188	0.927	0.8637	0.8644	0.8155	0.8818	0.954	0.9127	0.85868	0.8554	0.7008	0.85868	0.9401	0.85868	0.8169	0.9019	0.85868	1	0.9018	0.2474
RPLP0_24736_AD	0.2217	0.327509	0.1207	0.4388	0.2795	0.35	0.2467	0.2226	0.144	0.2523	0.3305	0.3171	0.1804	0.5515	0.4851	0.1396	0.5499	0.3019	0.267	0.5975	0.1833	0.2948	0.327509	0.2326	0.1837	0.1898	0.2604	0.2422	0.1826	0.327509	0.4259	0.133	0.0697	0.3068	0.2913	0.3394	0.2334	0.327509	0	0.6888	0.327509	0.4197	0.327509	0.2095	0.3341	0.327509	0.2555	0.185	0.327509
PXN_24747_AA	0.3907	0.2259	0.444706	0.4163	0.4247	0	0.1256	0	0.5207	0.444706	0	0.4441	0.2775	0.6856	0.294	0.4472	0.4581	0	0.5323	0.5706	0.6912	0.4674	0.4278	0.4924	0.7341	0.8229	0.444706	0.4673	0.444706	0.5584	0.5638	0.3677	0.8499	0	0.5349	0.39	0.6266	0.368	0.4423	0.4434	0.7528	0.6024	0.3567	0.4971	1	0.6277	0.4867	0.5189	0.459
C12orf43_24812_AA	0.6128	0.5407	0.6007	0.4996	0.6769	0.5089	0.5752	0.5527	0.6171	0.7206	0.7371	0.5659	0.5282	0.3534	0.691	0.655	0.7719	0.6706	0.6592	0.5345	0.6885	0.7364	0.8286	0.7387	0.5966	0.7364	0.5089	0.6111	0.8097	0.6171	0.525	0.6374	0.525	0.5584	0.5154	0.6305	0.7875	0.6367	0.8107	0.8012	0.7166	0.641	0.5816	0.6878	0.2165	0.518	0.652	0.4666	0.5972
DIABLO_24936_AD	0.1696	0	0.1459	0.0886	0.0527	0	0.0471	0.0584	0	0.1686	0.1648	0.229	0.2456	0.3049	0.1015	0.1227	0.301	0.2721	0	0.2219	0.4786	0.0712	0	0	0.134	0	0	0.2438	0	0.3723	0.4036	0.1153	0	0.1136	0.1526	0.349	0.4545	0.2541	0.3913	0.2513	0.104	0.3032	0.3043	0.2485	0.6441	0.3227	0.3218	0.0825	0.0534
RSRC2_24968_AA	0.6719	0.5399	0.7423	0.6377	0.7904	0.7134	0.6842	0.8141	0.8571	0.66425	0.5714	0.7273	0.5994	0.5746	0.623	0.6038	0.6602	0.7326	0.66425	0.6134	0.66425	0.4898	0.8387	0.6116	0.4909	0.7742	0.66425	0.6947	0.8485	0.4898	0.6729	0.6836	0.5134	0.5902	0.7467	0.5037	0.7071	0.6154	0.6269	0.6914	0.7423	0.6374	0.6341	0.6819	0.66425	0.6283	0.668	1	0.7059
OGFOD2_25014_AD	0.6923	1	0.9376	0.6637	0.8556	0.84	0.9173	0.8414	0.5971	0.5565	0.7149	0.8716	0.8309	1	0.9625	0.7344	1	0.813	0.842338	0.8184	0.8836	1	0.842338	0.862	0.8347	0.7916	0.7576	0.8014	0.842338	0.8755	0.949	0.8973	0.7552	1	0.9186	1	1	1	0.8032	0.8218	0.7709	0.954	0.9311	0.8424	0.9061	0.9336	0.9507	1	1
ARL6IP4_25036_AD	0.3778	1	0.4761	0.5636	0.2846	0.335	0.5882	0.4867	0.587933	0.587933	1	0.601	1	0.5108	0.3444	0.7176	0.587933	0.2964	0.2298	0.587933	0.587933	0.5067	0.8812	0.2909	0.1298	0.587933	0.3737	0.94	0.4499	0.2379	0.587933	0.4944	0.5676	0.587933	0.2726	0.7436	0.587933	0.7261	0.6545	0.587933	0.4335	0.3266	0.806	0.1298	0.6032	0.582	0.4723	0.343	0.4175
ARL6IP4_25037_AD	0.5431	1	0.5649	0.6794	0.5563	0.5864	0.6883	0.692	0.5775	1	1	0.8316	1	0.7193	0.5768	0.7946	0.692963	0.5607	0.5447	0.692963	0.3852	0.5627	0.9144	0.4347	0.3742	1	0.6308	0.9617	0.635	0.4575	0.692963	0.6675	0.6256	1	0.4021	0.8569	1	0.8463	0.7048	0.5775	0.7371	0.3915	0.791	0.3571	0.7536	0.692963	0.6421	0.6722	0.6816
ARL6IP4_25038_AD	0.9075	1	0.9166	0.9031	0.8854	0.9267	0.9535	0.9391	0.8845	1	1	0.9476	1	0.9023	0.9337	0.9539	0.8697	0.8737	0.8549	0.898908	0.7286	0.8856	0.9778	0.8655	0.8414	1	0.9241	0.9844	0.8835	0.8575	1	0.9026	0.9235	1	0.7615	0.9554	1	0.9627	0.927	0.8627	0.9186	0.834	0.9738	0.7642	0.9549	0.8883	0.9116	0.923	0.9218
CCDC92_25123_AA	0.7917	0.5827	0.8975	0.5069	0.6525	0.2365	0.6742	0.4913	0.4022	1	0.589	0.6841	0.466	0.6406	1	0.3876	0.6427	0.8989	0.1966	0.4756	0.5997	0.7232	0.4453	0.4665	0.3844	0.1832	0.2254	0.4242	0.3503	0.3551	0.5903	0.9022	0.5131	0.7714	0.8263	0.6906	0.8284	0.8127	0.6515	0.7708	0.3589	0.8853	0.7474	0.5076	0.79	0.7005	0.6527	0.3529	0.4373
ZNF664_25137_AD	0.7507	0.788	0.9233	0.6225	0.7453	0.8181	0.7596	0.7922	0.7218	0.8553	0.7368	0.9466	0.794	0.6115	0.6528	0.6849	0.6661	0.7983	0.708085	0.4089	0.7512	0.8126	0.6633	0.6703	0.7725	0.8525	0.8852	0.7112	0.8452	0.6615	0.6175	0.6957	0.6255	0.6843	0.7676	0.811	0.7117	0.7465	0.7296	0.6385	0.7403	0.699	0.6776	0.5117	0.708085	0.702	0.7564	0.7127	0.8006
GOLGA3_25307_AD	0.3948	0.2755	0.2669	0.4835	0.1493	0.4257	0.2964	0.3691	0.408	0.2193	0.2755	0.2975	0.2378	0.4618	0.2734	0.4894	0.1485	0.3885	0.0942	0.2869	0.2291	0.1577	0.304	0.5513	0.3532	0.314417	0.0354	0.3639	0.6094	0.2089	0.4479	0.2964	0.1478	0.2575	0.3389	0.4427	0.2263	0.3399	0.1577	0.2224	0.338	0.5073	0.305	0.4382	0.522	0.4034	0.4257	0.3446	0.3843
CHFR_25313_AA	0.3453	0.3495	0.4532	0.6423	0.4916	0.4266	0.3259	0.2894	0.4916	0.4916	0.2872	0.5371	0.3386	0.4916	0.3024	0.4532	0.443634	0.5044	0.443634	0.4462	0.4266	0.3424	0.7074	0.6592	0.5301	0.1621	0.6929	0.4149	0.4204	0.4583	0.392	0.311	0.8855	0.3128	0.4532	0.3259	0.3353	0.4204	0.5301	0.2567	0.4293	0.392	0.2582	0.4773	0.4532	0.4765	0.5068	0.5211	0.4085
CHFR_25315_AA	0.2828	0.3621	0.4151	0.1407	0.3782	0.2332	0.2828	0.2828	0.2211	0.37673	0.4151	0.2791	0.2282	0.4409	0.3111	0.3716	0.37673	0.3716	0.37673	0.2807	0.4151	0.5867	0.1362	0.3212	0.7395	0.5867	0.37673	0.2986	0.37673	0.3716	0.2211	0.3212	0.3557	0.5867	0.1755	0.4502	0.2746	0.2211	0.4038	0.2332	0.4799	0.2163	0.3389	0.3972	0.7615	0.4918	0.4151	0.4746	0.5419
ZNF10_25340_AD	0.8762	1	0.9175	0.8157	0.8277	1	0.9409	0.8618	0.9034	1	1	0.8476	0.8476	0.9079	0.844	0.889	0.639	1	0.867792	0.8958	1	0.868	0.8585	0.9192	1	1	0.867792	0.7668	1	1	0.7734	0.8415	0.7597	0.7668	0.8476	0.8135	0.8157	1	0.6887	0.8533	0.8277	0.8533	0.795	0.7024	1	1	0.8634	0.8602	0.8985
RPL21_25524_AD	0.973	0.9106	0.8523	0.8616	0.7116	0.9379	0.9619	0.7847	0.907	0.9464	0.8403	0.6961	0.8663	0.8002	0.7499	0.8332	0.802	0.9316	0.7964	0.8244	0.7631	0.8954	0.8749	0.7181	0.648	0.611	0.7035	0.7721	0.8855	0.7579	0.9593	0.9353	0.9037	0.7657	0.8622	0.9504	0.802	0.8838	0.8287	0.3683	0.7662	0.8363	0.6054	0.8766	0.8067	0.7563	0.8481	0.6295	0.6805
RPL21_25525_AD	0.6753	0.6728	0.6724	0.6886	0.4294	0.5083	0.7504	0.5538	0.6908	0.776	0.6238	0.4323	0.6573	0.5714	0.5289	0.4913	0.4362	0.8281	0.6102	0.4193	0.4234	0.5576	0.5736	0.4725	0.4575	0.2792	0.4293	0.5552	0.7522	0.8113	0.674	0.7275	0.668	0.4376	0.4987	0.8814	0.5979	0.5715	0.4961	0.1788	0.5588	0.6791	0.381	0.5552	0.5685	0.564	0.7006	0.3045	0.5178
RPL21_25526_AD	0.0964	0.2168	0.3487	0.3359	0.2832	0.1119	0.2243	0.3048	0.2377	0.5331	0.3296	0.3241	0.2932	0.3141	0.3252	0.2078	0.2803	0.3159	0.3448	0.261	0.2402	0.1532	0.1991	0.2806	0.3988	0.2836	0.4002	0.2925	0.3162	0.6319	0.1142	0.2102	0.2259	0.2893	0.1606	0.3432	0.3914	0.2477	0.2303	0.307	0.3078	0.3418	0.2998	0.1904	0.4018	0.3475	0.3299	0.2862	0.39
SUPT20H_25665_AA	0.2132	0.1607	0.1635	0.2159	0.2961	0.3389	0.2884	0.3029	0.1503	0	0.1824	0.3423	0.1641	0.2768	0.2701	0.3725	0.3539	0.3778	0.2983	0.2956	0.2961	0.2378	0.233	0.1675	0.3293	0.3134	0.5482	0.4709	0.1859	0.4568	0.2806	0.2947	0.1174	0.3287	0.3251	0.2307	0.3152	0.179	0.4901	0.2708	0.2008	0.283	0.2612	0.3533	0.2592	0.3665	0.2265	0.2464	0.2726
TRIM13_25922_AD	0.1647	0.3146	0.6317	0.4957	0.3219	0.4172	0.3327	0.4699	0.4768	0.472053	0.1773	0.4342	0.167	0.3466	0.3934	0.5073	0.1663	0.4872	0.145	0.533	0.5001	0.2762	0.3183	0.393	0.3155	0.3263	0.3145	0.2235	0.5992	0.4688	0.3401	0.473	0.6622	0.4713	0.279	0.6214	0.5043	0.5713	0.2563	0.5787	0.6882	0.532	0.2767	0.624	0.4805	0.3537	0.3741	0.333	0.4588
LMO7_26065_AA	0.6777	0.4046	0.4068	0.5472	0.5548	0.5212	0.2816	0.44	0.3769	0.3623	0.5772	0.663	0.5755	0.3599	0.3119	0.505	0.6315	0.3868	0.503602	0.4116	0.5328	0.6038	0.2455	0.4739	0.4372	0.3494	0.3481	0.3821	0.3974	0.7618	0.3371	0.4029	0.4805	0.4716	0.561	0.4465	0.5257	0.4613	0.5382	0.3925	0.5582	0.5964	0.467	0.5708	0.3058	0.5279	0.5101	0.5753	0.5851
ATP11A_26311_AA	0.3243	0.3458	0.2978	0.3675	0.3128	0.4353	0.3005	0.1736	0.3257	0.333849	0.3055	0.2721	0.3548	0.3448	0.3991	0.3699	0.333849	0.4489	0.333849	0.4	0.2016	0.5767	0.333849	0.2984	0.333849	0.2951	0.333849	0.6479	0.333849	0.6234	0.3597	0.3401	0.5316	0.6512	0.4343	0.3205	0.4349	0.2998	0.4453	0.5058	0.4071	0.3876	0.3236	0.3068	0.333849	0.3201	0.3643	0.2503	0.2823
ATP11A_26312_AA	0.25	0.2616	0.3666	0.4746	0.2415	0.5781	0.3748	0.2923	0.5716	0.6904	0.2889	0.5158	0.2771	0.3538	0.3543	0.5382	0.3917	0.4584	0.384724	0.5141	0.3739	0.37	0.384724	0.3049	0.5653	0.3939	0.384724	0.7735	0.384724	0.4081	0.2794	0.3704	0.372	0.6873	0.1893	0.2199	0.4725	0.4947	0.5753	0.364	0.3517	0.2479	0.3644	0.5179	0.384724	0.3674	0.3092	0.4358	0.2037
PARP2_26429_AD	0.9581	0.6179	0	1	0.0179	0.4867	0	0	0.6116	0	0.5258	0.7063	0.7248	1	0.9702	0.0155	0	1	0.7572	0.0305	0.017	0.5595	0	0	0	0.6581	0.0371	0	0	0.6179	0.5187	0	0.623	0.6431	0	0.657	0	0.6063	0	0.0194	0.985	1	0.026	0.6268	0	0.0155	0.0415	0	0.708
RNASE1_26467_AA	0.5799	0.435	0.516607	0.569	0.7253	0.516607	0.569	0.4944	0.4611	0.516607	0.442	0.4681	0.4898	0.569	0.386	0.5455	0.535	0.6101	0.3914	0.3538	0.5646	0.516607	0.5885	0.1416	0.4407	0.5344	0.516607	0.4681	0.5166	0.7049	0.4681	0.5014	0.6489	0.6226	0.5763	0.6173	0.43	0.6377	0.4526	0.5136	0.6787	0.4681	0.453	0.5136	0.6935	0.5182	0.5047	0.516607	0.516607
METTL17_26479_AA	0.2047	0.4797	0.5301	0.4341	0.5946	0.4231	0.3021	0.4572	0.191	0.3086	0.3957	0.5908	0.469	0.5258	0.2925	0.4911	0.4317	0.4263	0.5153	0.5164	0.4965	0.5306	0.1461	0.4376	0.4451	0.4748	0.3848	0.5415	0.2785	0.3399	0.5189	0.4791	0.3773	0.6162	0.5843	0.4194	0.581	0.4973	0.4327	0.4919	0.5015	0.6319	0.5419	0.5403	0.5995	0.5361	0.5483	0.4783	0.3765
SALL2_26607_AD	0.8328	0.637	0.6934	0.6594	0.887	1	1	1	0.7839	1	1	1	0.4067	0.7478	0.7727	1	0.7773	1	0.848452	1	1	0.7202	0.6737	1	0.848452	0.8388	0.848452	0.8137	0.4473	1	0.8645	0.6085	0.426	1	1	0.7807	0.6102	0.7504	0.8857	0.605	0.7623	0.8453	0.848452	1	0.7683	1	0.781	1	1
PSMB5_26694_AD	0.3264	0.51	0.2869	0.4412	0.2989	0.5486	0.4168	0.5168	0.2148	0.4101	0.3775	0.4007	0.3032	0.4961	0.1635	0.5346	0.1542	0.7593	0.3428	0.2177	0.2988	0.2973	0.3875	0.2057	0.4981	0.3354	0.4963	0.5322	0.5262	0.5358	0.3385	0.1949	0.5362	0.0633	0.218	0.2871	0.3466	0.2396	0.333	1	0.0799	0.2037	0.3078	0.2493	0.0944	0.6006	0.3928	0.228	0.1937
ACIN1_26705_AD	0.6905	0.5381	0.5153	0.5152	0.3618	0.7628	0.6708	0.5001	0.5109	0.3684	0.6514	0.5235	0.5298	0.7313	0.4541	0.4921	0.6554	0.722	0.4457	0.6255	0.5436	0.6729	0.531	0.7877	0.4851	0.4247	0.4812	0.5872	0.2379	0.4888	0.6206	0.6888	0.4187	0.6133	0.6556	0.637	0.6669	0.5089	0.512	0.5631	0.4554	0.7753	0.5713	0.4669	1	0.8232	0.6057	0.6625	0.5625
AP1G2_26773_AD	0.3616	0.1047	0.05	0.2062	0.1417	0.1449	0.0857	0.08	0	0.5344	0.2564	0.1075	0.1256	0.0531	0.0646	0.1131	0	0.0834	0.3073	0.0962	0.1661	0.2834	0.1629	0.1867	0.1616	0.1744	0	0.2692	0.2268	0.0434	0.0997	0.1636	0.2479	0.1588	0.1458	0.1175	0.1097	0.4243	0.3684	0.2063	0.3874	0.0914	0.3622	0.3003	0.2332	0.3017	0.2636	0.0521	0.2123
EMC9_26855_AA	0.0711	0.2508	0.385	0.2344	0.3961	0.3488	0.2293	0.2861	0.1175	0.326577	0.3378	0.5094	0.2032	0.3605	0.4123	0.1984	0.2344	0.3646	0.4209	0.3894	0.2199	0.2078	0.401	0.2898	0.2429	0.2344	0.393	0.249	0.4476	0.3488	0.3378	0.393	0.3797	0.3559	0.2344	0.3646	0.3894	0.4154	0.3575	0.5193	0.3186	0.3913	0.3894	0.4335	0.4127	0.4335	0.3613	0.3575	0.2344
SDR39U1_27011_AD	0.4037	0.1131	0	0.5232	0	0.185	0.7118	0	0.5297	0.2336	0.4833	0	0.400431	0.5728	0.2369	0.5412	0.5218	0.5865	0.3564	0.4414	0.5056	0.32	0.0719	0	0.6149	0.4571	0.1833	0.3777	0.3609	0.447	0.4004	0.3956	0.428	0.3828	0.4612	0.6914	0.400431	0.3014	0.4066	0.27	0.4172	0	0.5752	0.6165	0	0.6375	0.5656	0.2808	0.4187
HECTD1_27107_AD	0.5574	0.5895	0.2526	0.4278	0.3818	0.5877	0.5429	0.4665	0.3433	0.491942	0.4934	0.6033	0.7637	0.3307	0.3142	0.5748	0.2894	0.4091	0.491942	0.1896	0.4516	0.5709	0.6177	0.4943	0.4873	0.491942	0.491942	0.5752	0.491942	0.3433	0.4516	0.5449	0.4063	0.491942	0.5111	0.6214	0.5429	0.8261	0.5709	0.5709	0.3534	0.4489	0.7171	0.5111	0.491942	0.35	0.4319	0.5034	0.3104
VCPKMT_27451_AD	0.539412	0.6582	0.2105	0.6292	0.4706	0.4706	0.4507	0.4156	0.539412	0.8767	0.5333	0.3478	0.3077	0.597	0.4061	0.5776	0.597	0.5385	0.539412	0.5123	0.2286	0.4706	0.539412	0.64	0.6124	0.539412	0.539412	0.539412	0.6897	0.64	0.3415	0.6087	0.7805	0.4414	0.2286	0.241	0.5714	0.4375	0.6267	0.3478	0.6038	0.6087	0.4706	0.7477	0.539412	0.5308	0.5909	0.6154	0.7273
CDKL1_27475_AA	0.5029	0.5584	0.912	0.6156	0.3216	0.657082	0.568	0.8585	0.676	0.6692	0.5029	0.7024	0.7521	0.7061	0.5756	0.6621	0.7734	0.7356	0.657082	0.7061	0.4867	0.868	1	0.6106	0.589	0.4473	0.657082	0.7326	0.3575	1	0.6782	0.6799	0.5413	0.657082	0.7597	1	0.8199	0.8415	0.4473	0.8067	0.5742	0.676	1	0.5584	0.8958	0.7756	0.7797	0.5229	0.4194
SLC38A6_27787_AA	0.7681	0.695549	0.6022	0.5979	0.9415	0.7681	0.695549	0.6301	0.8833	0.7395	1	0.6186	0.5955	0.7162	0.7395	0.7395	0.695549	0.5748	0.6204	0.8949	0.5867	0.8039	0.6697	0.6426	0.8346	0.8632	0.73	0.7977	0.8039	0.5979	0.711	0.7029	0.695549	0.6543	0.5247	0.8098	0.5698	0.612	0.8999	0.7517	0.8833	0.612	0.4308	0.6301	0.7977	0.711	0.7566	0.695549	0.8688
SLC38A6_27790_AA	0.1964	0.19279	0.2588	0.3415	0.0391	0.1	0.0485	0.1608	0.19279	0.2842	0.19279	0.1114	0.2628	0.2588	0.348	0.2386	0.19279	0.1888	0.0485	0.449	0.3946	0.2895	0.2588	0.1933	0.3946	0.0357	0.0753	0.3284	0.234	0.4411	0.2659	0.3284	0.1279	0.3946	0.1692	0.4112	0	0.4162	0.2588	0.3879	0.2659	0	0.19279	0.19279	0.0716	0.1964	0.5116	0.19279	0.19279
PLEKHG3_27903_AD	0.7402	0.4776	0.8009	0.43	0.5014	0.4414	0.4871	0.4681	0.4708	0.7344	0.5911	0.2953	0.472	0.5014	0.4653	0.2739	0.4207	0.4911	0.460377	0.5348	0.2869	0.3697	0.4621	0.5348	0.6935	0.43	0.4681	0.4916	0.6679	0.460377	0.5252	0.5828	0.4681	0.5014	0.4514	0.5214	0.4152	0.6598	0.3137	0.557	0.2291	0.4056	0.6299	0.5014	0.6204	0.5371	0.5453	0.3507	0.4373
RAB15_27923_AD	0.4053	0.7449	1	0.9033	1	0.845	1	1	1	0.854793	0.7003	0.8955	1	0.7003	1	0.8653	1	0.7316	0.854793	0.9131	0.6607	1	0.854793	0.8296	1	0.6817	1	1	0.5768	1	0.8887	1	0.7872	1	0.835	0.8854	1	0.854793	0.854793	1	0.6149	0.7957	1	1	0.757	0.8323	0.8766	1	1
RAB15_27924_AD	0.1022	0.1459	0.4706	0.2204	0.3018	0.1945	0.2319	0.2705	0.1137	0.0619	0.201	0.2366	0.3806	0.1361	0.4752	0.2293	0.5364	0.2789	0.276689	0.2913	0.1148	0.4821	0.276689	0.2595	0.1443	0.1917	0.4752	0.2852	0.2535	0.2444	0.5073	0.3244	0.245	0.3765	0.2561	0.5894	0.4904	0.2464	0.1248	0.7905	0.3176	0.531	0.547	0.3765	1	0.5928	0.3755	0.1991	0.3117
SRSF5_28158_AA	0.3306	0.3698	0.7137	0.4922	0.4923	0.4323	0.4567	0.6066	0.4453	0.314	0.3105	0.5932	0.4572	0.7037	0.6447	0.6233	0.5327	0.5564	0.3304	0.6825	0.4067	0.4928	0.2042	0.5035	0.451	0.2698	0.479	0.6992	0.317	0.5482	0.7928	0.6658	0.5059	0.6938	0.4755	0.7676	0.6823	0.433	0.2834	0.6005	0.6081	0.7562	0.6558	0.7825	0.791	0.8107	0.6802	0.4156	0.4002
DCAF4_28234_AA	0.5584	0.4517	0.5393	0.4837	0.5781	0.2438	0.518	0.4662	0.4916	0.3006	0.5109	0.5801	0.5732	0.4462	0.5447	0.3495	0.4532	0.5106	0.527819	0.3823	0.6218	0.6423	0.4448	0.3882	0.6394	0.3607	0.5919	0.3731	0.4689	0.7946	0.3636	0.5007	0.525	0.6218	0.5322	0.5301	0.5708	0.5632	0.4293	0.6592	0.5828	0.392	0.3715	0.4916	0.8855	0.5919	0.5708	0.4916	0.5101
ACOT2_28301_AD	0.9079	0.7455	0.5419	0.7178	0.6958	0.7614	0.7202	0.7646	0.718	0.8541	0.8069	0.6306	0.7043	0.8363	0.6934	0.8102	0.7257	0.791	0.7281	0.5725	0.8625	0.7654	0.8852	0.7094	0.7723	0.7678	0.6645	0.8186	0.8531	0.8967	0.7828	0.786	0.7614	0.6711	0.8422	0.899	0.8187	0.8226	0.6869	0.7411	0.7342	0.7172	0.7805	0.5733	0.7968	0.867	0.6747	0.7483	0.6685
PTGR2_28316_AD	0.3651	0.4925	0.3583	0.3083	0.3929	0.44511	0.3785	0.4733	0.4951	0.3929	0.2797	0.4803	0.3929	0.5755	0.4026	0.4416	0.5641	0.3651	0.44511	0.3723	0.3302	0.3568	0.2834	0.3704	0.3302	0.2644	0.44511	0.4733	0.4371	0.535	0.3014	0.449	0.3438	0.3014	0.5799	0.5641	0.5061	0.4783	0.4541	0.44511	0.5016	0.4302	0.2834	0.4251	0.2056	0.4058	0.5471	0.2797	0.4632
PTGR2_28317_AD	0.6157	0.6548	0.5365	0.6585	0.1851	0.405339	0.6978	0.213	0.5052	0.1329	0.2747	0.3367	0.2319	0.4486	0.3599	0.206	0.594	0.1968	0.405339	0.3272	0.7939	0.317	0.541	0.252	0.4015	0.1223	0.0997	0.7145	0.4991	0.4435	0.2478	0.7235	1	0.2341	0.7764	0.3626	0.4082	0.2667	0.4131	0.1219	0.3158	0.3354	0.5791	0.4119	0.405339	0.3214	0.5732	0.2334	0.2258
PTGR2_28318_AD	0.721	0.6711	0.6749	0.8288	0.2371	0.472129	0.8305	0.2532	0.5461	0.1538	0.461	0.3471	0.3918	0.3828	0.4834	0.2793	0.5806	0.3461	0.472129	0.4756	0.9009	0.444	0.7855	0.3233	0.5843	0.3754	0.3298	0.7357	0.4961	0.4526	0.3955	0.7933	1	0.3605	0.7286	0.3032	0.4318	0.3103	0.498	0.3583	0.4241	0.4305	0.802	0.4921	1	0.4387	0.6015	0.4079	0.2967
FCF1_28421_AA	0.873852	1	0.7798	0.7767	0.8037	0.815	0.8141	1	0.873852	0.873852	0.8687	0.7146	0.8226	1	0.8703	0.6614	1	0.7231	0.873852	0.8483	0.752	1	0.873852	0.8783	0.8517	1	0.873852	0.7241	0.873852	1	0.6419	0.8051	1	1	0.7503	0.9203	1	1	1	0.7169	0.8538	1	1	0.9221	0.873852	1	0.7376	0.8962	0.9093
ZC2HC1C_28481_AD	0.4205	0.5028	0.3906	0.5737	0.5746	0.6791	0.4823	0.7173	0.6526	0.4981	0.5386	0.5348	0.6689	0.6356	0.5004	0.6809	0.6079	0.5397	0.7297	0.63	0.4937	0.6433	0.6269	0.6399	0.38	0.5278	0.4486	0.5745	0.3607	0.7583	0.6146	0.516	0.4765	0.7424	0.3923	0.5315	0.5356	0.6522	0.5635	0.5677	0.5136	0.7342	0.6174	0.5833	0.4868	0.775	0.4696	0.5914	0.8089
ZC2HC1C_28482_AD	0.1201	0.234	0.062	0.1539	0.1055	0.0878268	0.0668	0.1256	0	0	0	0.0645	0.1083	0	0.0573	0.0633	0.3601	0	0.0878268	0	0.2238	0.2597	0.2581	0.1442	0	0.1189	0.1071	0	0.0535	0.0878268	0	0.0566	0.1628	0	0	0.1547	0.1478	0.1434	0	0	0	0.2849	0	0	0	0.3105	0	0	0.1688
C14orf159_28848_AD	1	1	1	0.393	0	0.4266	1	0.5325	1	0	1	0.4669	0.5381	0.4931	1	1	0.6169	0.4617	0.4292	1	0.5619	0.6103	1	1	1	1	0.7014	0.4719	0.4857	0.4545	1	1	1	1	0.4447	1	0.4563	1	1	1	1	1	0.4862	1	1	1	1	0.4894	1
SERPINA1_29115_AA	0.498	0.981	0.9929	0.9835	0.9947	0.9709	0.9636	0.9891	0.928896	0.921	0.928896	0.9764	0.9771	0.8358	0.928896	0.984	0.9605	0.6522	0.9156	0.9862	0.9814	0.9663	0.928896	0.9878	0.9755	0.9459	0.983	0.4703	0.9395	0.9113	0.8801	0.957	0.9973	0.9826	0.9965	0.8491	0.9848	0.9847	0.9762	0.9919	0.9867	0.9796	0.9841	0.9896	0.8367	0.9715	0.9903	0.9773	0.993
SERPINA1_29123_AA	0.5711	0.9629	0.959	0.9726	0.9921	0.9649	0.9492	0.9793	0.902426	0.8756	0.902426	0.9723	0.9745	0.4823	0.902426	0.9796	0.9608	0.5861	0.7083	0.973	0.9737	0.9726	0.902426	0.9799	0.9493	0.9514	0.9725	0.2115	0.9295	0.7879	0.816	0.9515	0.9919	0.9725	0.976	0.8499	0.9841	0.993	0.9899	0.982	0.9938	0.9689	0.9736	0.985	0.7206	0.9588	0.9853	0.9682	0.9849
BDKRB2_29187_AA	0.5983	1	0.947066	1	1	0.947066	1	1	0.8142	1	0.8097	1	1	1	1	1	1	1	0.947066	0.5841	1	1	1	1	0.5841	1	1	1	1	1	1	1	1	1	1	1	1	1	1	1	0.3649	1	1	1	1	1	1	1	1
BDKRB2_29188_AA	0.1466	0.1249	0.0956	0.0162	1	0.228698	0.2061	0.0754	0.1701	0.228698	0.0329	0.1709	0.199	0.0824	0.2353	0.1109	0.0381	0.2756	0.228698	0.0576	0.0696	0.1345	0.2764	0.1388	0.2228	0.1063	0.228698	0.2268	1	0.2498	0.4218	0.1895	0.078	0.1126	0.229	0.1632	0.2377	0.1084	0.1063	0.1485	0.0734	0.2362	0.209	0.1558	0.3503	0.3029	0.12	0.0917	0.0999
GSKIP_29198_AD	1	0.5926	1	1	1	0.978	1	1	1	1	0.6983	1	0.3866	0.9704	0.7291	1	1	0.9829	0.878787	1	1	1	1	1	0.6393	0.9575	1	0.9252	1	0.9562	0.4211	1	1	1	0.6033	1	0.9764	0.5926	1	1	0.9756	0.9632	0.5686	0.4923	0.878787	1	1	1	0.5217
GSKIP_29199_AD	0.2327	0.1196	0.0881	0.1796	0.156	0.0744	0.0927	0.0916	0.1773	0.1646	0.1048	0.2246	0.2522	0.1671	0.1157	0.1191	0.1418	0.1192	0.7293	0.1243	0.1249	0.2518	0.392	0.1426	0.2273	0.3145	0.2501	0.1692	0.4884	0.1306	0.2168	0.1326	0.2416	0.1001	0.1977	0.1601	0.0813	0.2311	0.2846	0.2654	0.1324	0.2625	0.1541	0.1101	0.7006	0.2137	0.2008	0.0476	0.0922
SLC25A29_29255_AA	0.1473	0.1116	0.6166	0.1811	0.4341	0.449922	0.1694	0.4217	0.1061	0.2861	0.0874	0.706	0.2795	0.5891	0.3534	0.516	0.3769	0.3632	0.4837	0.5501	0.0917	0.4846	0.0946	0.2615	0.5986	0.3075	0.6113	0.4862	0.1852	0.6113	0.6287	0.4375	0.3652	0.588	0.4113	0.4814	0.7098	0.3195	0.3893	0.6119	0.4999	0.5618	0.6803	0.5926	0.8542	0.5948	0.6963	0.3044	0.2185
SLC25A29_29256_AA	0.0599	0.0833	0.475	0.2213	0.3203	0	0.0986	0.3033	0.0657	0.1248	0.0526	0.6171	0.2711	0.4773	0.4475	0.3048	0.3074	0.161	0.1733	0.585	0.0998	0.6376	0.0085	0.1914	0.2844	0.1532	0.3118	0.3534	0.0522	0.3411	0.4782	0.3475	0.2616	0.7317	0.3102	0.2331	0.6181	0.1771	0.2441	0.5382	0.409	0.4469	0.6221	0.53	0.8047	0.5308	0.5564	0.1545	0.1041
SLC25A29_29257_AA	0.3098	0.473	0.3965	0.628	0.4159	0.2807	0.3882	0.4017	0.4245	0.3234	0.4214	0.4432	0.5396	0.4192	0.6368	0.3283	0.4632	0.2873	0.2642	0.5661	0.5954	0.6821	0.0882	0.45	0.2697	0.343	0.2725	0.4235	0.2615	0.286	0.383	0.4481	0.4331	0.6877	0.4412	0.2763	0.4358	0.3742	0.3996	0.4601	0.4474	0.4205	0.47	0.4712	0.4593	0.4688	0.3817	0.3396	0.3365
AKT1_29569_AD	0.8287	0.8518	0.9704	0.7464	1	0.6558	0.8216	0.9564	1	0.6158	0.9111	0.8923	0.7619	0.9211	0.9391	0.8539	1	0.9088	1	0.9542	0.6701	0.9589	0.5438	1	0.8807	1	0.8719	0.8756	0.7474	0.9161	1	0.804	0.9043	0.8688	0.7219	0.8764	0.9555	0.9106	0.6962	0.9144	1	0.9264	0.8754	0.8583	0.903	0.8954	0.9346	0.908	0.9499
SNRPN_29702_AA	0.23	0.5117	0.3265	0.4697	0.4681	0.4958	0.4211	0.4	0.5367	0.6111	0.4566	0.4706	0.2632	0.2479	0.6227	0.2931	0.3868	0.3749	0.1722	0.44	0.4961	0.2975	0.4047	0.2408	0.3978	0.3118	0.3294	0.2777	0.3117	0.424689	0.4948	0.6292	0.1064	0.7352	0.4615	0.4408	0.593	0.4181	0.411	0.4797	0.7349	0.6077	0.455	0.4477	0.4552	0.299	0.5111	0.2404	0.4653
JMJD7_30119_AA	0.5623	0.7127	0.6851	0.9194	0.8419	0.713534	0.738	0.7565	0.6207	0.8721	0.7377	0.9175	0.8797	0.5436	0.9203	0.8887	0.6818	0.7008	0.7088	0.8358	0.7831	0.4224	0.5632	0.6978	0.6895	0.716	0.3984	0.9059	0.7609	0.6085	0.8349	0.5274	0.5323	0.85	0.7399	0.7756	0.7093	0.6165	0.7092	0.6619	0.9145	1	0.8451	0.8022	0.7918	0.8576	0.7306	0.5295	0.5533
ZSCAN29_30240_AA	0.1857	0.4438	0.1319	0.281	0.6148	0.1153	0.2962	0.1543	0.092	0.3781	0.3853	0.299445	0.4062	0.3132	0.3924	0.2179	0.2331	0.2852	0.299445	0.2597	0.2148	0.249	0.299445	0.2387	0.2618	0.477	0.299445	0.2101	0.299445	0.299445	0.3853	0.3595	0.299445	0.1203	0.2753	0.3579	0.3988	0.2852	0.1857	0.4585	0.1857	0.3132	0.2852	0.1319	0.4318	0.2647	0.3132	0.2331	0.2021
TUBGCP4_30255_AA	0.3672	0.4085	0.3559	0.392	0.2567	0.2438	0.0646	0.3453	0.293	0.319365	0.2602	0.1295	0.392	0.2602	0.2894	0.304	0.1214	0.4085	0.319365	0.3142	0.2602	0.3672	0.293	0.4204	0	0.1621	0.319365	0.3559	0.3559	0.319365	0.2165	0.4462	0.1947	0.2602	0.3259	0.2249	0.2602	0.1621	0.4362	0.0882	0.3386	0.3053	0.4204	0.1214	0.5919	0.3424	0.3672	0.3849	0.1535
DUOXA1_30393_AD	0.3871	0.3327	0.3497	0.4435	0.4525	0.4047	0.2663	0.4375	0.4525	0.6784	0.3562	0.4407	0.3842	0.1801	0.4639	0.3225	0.2479	0.3307	0.434196	0.899	0.4765	0.4004	0.3163	0.3968	0.434196	0.5336	0.434196	0.6279	0.3286	0.409	0.434196	0.3229	0.3724	0.434196	0.2339	0.4939	0.4457	0.3035	0.1807	0.4383	0.5973	0.3923	0.5792	0.4697	0.3886	0.4365	0.3684	0.3197	0.5873
DUOX1_30405_AD	0.0579	0.0437	0.239	0.0594	0.0969	0.0563	0.0719	0.0935	0.0253	0.0428	0.0455	0.3107	0.1396	0.146	0.0871	0.1788	0.0941	0.1437	0.14502	0.1966	0.0629	0.2656	0.0254	0.1417	0.1961	0.1985	0.1277	0.2378	0.0509	0.315	0.2101	0.1681	0.0941	0.1424	0.1919	0.3291	0.315	0.112	0.0558	0.2635	0.2635	0.2263	0.2313	0.1963	0.3379	0.357	0.2128	0.091	0.0299
SPATA5L1_30425_AD	0.2036	0.3035	0.5011	0.3986	0.3805	0.169	0.3016	0.0971	0.4158	0.1422	0.2946	0.2587	0.3321	0.3712	0.3581	0.2662	0.261	0.4653	0.2819	0.3113	0.1716	0.3042	0.2103	0.3617	0.4272	0.246	0.1163	0.4249	0.3091	0.528	0.278	0.2704	0.3712	0.2642	0.246	0.4427	0.3737	0.4272	0.2873	0.5013	0.3706	0.3223	0.2846	0.2568	0.3764	0.4398	0.2429	0.1053	0.0484
GALK2_30533_AA	0.825	0.9004	0.8963	0.7695	0.7466	0.762408	0.7586	0.6714	0.7971	0.8627	0.6875	0.7237	0.9167	0.8462	0.8363	0.6836	0.8761	0.9004	0.762408	0.9004	0.7423	0.8462	0.557	0.8327	0.6111	0.541	0.7021	0.8761	0.8963	0.762408	0.7021	0.9167	1	0.762408	0.762408	0.9041	0.7423	0.5858	0.8327	0.7021	0.9108	0.7021	0.3438	0.7586	0.762408	0.9041	0.7971	0.7276	0.7795
FAM227B_30549_AD	0.5736	0.4466	0.2318	0.634	0.5632	0.483	0.3165	0.4952	0.6669	0.296	0.564	0.3245	0.5436	0.6271	0.4642	0.4177	0.4567	0.5531	0.51181	0.6108	0.4188	0.51	0.542	1	0.4728	0.341	0.4021	0.4332	0.4188	0.5285	0.7161	0.6534	0.5285	0.3353	0.4021	0.4152	1	0.4188	0.6316	0.4066	0.5169	0.4868	0.4642	0.4447	0.5436	0.4188	0.3814	0.4567	0.729
GABPB1_30575_AD	0.5457	0.3212	0.2619	0.5079	0.2986	0.5291	0.2439	0.4529	0.2454	0.3782	0.3025	0.5867	0.4529	0.4862	0.4233	0.4662	0.6507	0.2868	0.5419	0.5079	0.4151	0.2619	0.4409	0.2121	0.6395	0.4599	0.3621	0.132	0.311786	0.4701	0.3212	0.3922	0.3025	0.2755	0.3269	0.3305	0.1913	0.3269	0.2949	0.2211	0.3152	0.3446	0.1957	0.3548	0.2022	0.3331	0.2427	0.2541	0.4013
USP8_30598_AD	0.6615	0.5588	0.4099	0.7027	0.4783	0.4687	0.6244	0.6539	0.6547	0.5009	0.6846	0.513001	0.643	0.5785	0.5659	0.4881	0.6008	0.4054	0.513001	0.4083	0.5627	0.531	0.6142	0.6179	0.473	0.7554	0.513001	0.643	0.513001	0.7628	0.1943	0.6346	0.6346	0.3718	0.513001	0.7056	0.6471	0.2875	0.5778	0.4112	0.5821	0.5009	0.5149	0.5043	0.513001	0.4815	0.6397	0.7183	0.438
TEX9_30762_AD	0.4143	0.5485	0.5473	0.5188	0.6193	0.7725	0.596	0.7268	0.6088	0.3312	0.4892	0.5203	0.5115	0.4111	0.4976	0.6201	0.4143	0.4868	0.553456	0.5859	0.5309	0.4976	0.6088	0.5999	0.4591	0.4212	0.5691	0.7682	0.553456	0.4791	0.5601	0.4591	0.6293	0.6293	1	0.5444	0.5219	0.4885	0.6184	0.2359	0.5309	0.4301	0.5309	0.6599	0.4591	0.5532	0.5776	0.5365	0.4666
ZNF280D_30781_AA	0.6631	0.7201	0.5581	0.6222	0.673	0.694406	0.7748	0.7875	0.8099	0.2916	0.6346	0.7477	0.8664	0.5142	0.7354	0.5264	0.7875	0.5815	0.7354	0.678	0.7875	0.7477	0.8006	0.6984	0.7554	0.6674	0.5815	0.6494	0.9026	0.6069	0.6617	0.6617	0.6185	0.7875	0.8065	0.7643	0.7643	0.6324	0.6806	0.84	0.6494	0.6324	1	0.7354	0.694406	0.6494	0.8006	0.8431	0.7527
NARG2_30965_AA	0.713	0.3875	0.4898	0.6183	0.3929	0.4423	0.5258	0.5917	0.5969	0.5272	0.6138	0.7395	0.4638	0.6578	0.7498	0.6592	0.713	0.6481	1	0.5644	0.629	0.6286	0.7269	0.4468	0.6743	0.8737	0.8613	0.5013	0.6543	0.8578	0.5811	0.5366	0.5867	0.6149	0.5941	0.7215	0.6452	0.554	0.6963	0.5867	0.7702	0.5436	0.5913	0.4347	0.9022	0.6589	0.5867	0.629	0.6256
TPM1_30987_AD	0.5426	0.9283	0.9628	0.8892	0.8938	0.871175	0.9525	0.9271	0.9329	0.9439	0.9199	0.9189	0.8191	0.9329	1	0.9559	0.9209	1	0.3929	1	0.8381	0.8806	0.7444	0.9418	0.8381	0.9248	0.7127	0.9307	0.89	0.871175	0.9196	0.9119	1	0.8191	0.8137	0.9486	1	1	0.8859	0.871175	0.8436	0.9084	0.8768	0.8661	0.9235	0.9093	0.8913	1	0.9711
VWA9_31209_AD	0.4255	0.5492	0.6626	0.5505	0.4522	0.4299	0.4706	0.4685	0.6202	0.4828	0.6427	0.449	0.4255	0.4906	0.3379	0.6836	0.3721	0.3991	0.433384	0.397	0.7097	0.2382	0.5909	0.3377	0.3077	0.433384	0.433384	0.4255	0.433384	0.6	0.7761	0.4255	0.25	0.2878	0.7619	0.3077	0.4156	0.433384	0.2139	0.7857	0.5846	0.4309	0.3243	0.4985	0.433384	0.4457	0.64	0.4373	0.4364
VWA9_31228_AD	0.1695	0.3327	0.2783	0.2567	0.4093	0.3972	0.3201	0.4698	0.2001	0.3079	0.3201	0.2529	0.38	0.2377	0.254	0.1979	0.1373	0.2681	0.273761	0.2206	0.0803	0.3492	0.3241	0.2636	0.2617	0.1549	0.2231	0.3996	0	0.2066	0.0574	0.3004	0.291	0.2794	0.0847	0.28	0.3169	0.0949	0.2608	0.1293	0.2554	0.2122	0.2489	0.2852	0.1841	0.3472	0.1599	0.4802	0.4404
SNAPC5_31271_AD	0	0.171	0	0	0.2918	0.170264	0.1316	0.2212	0.0842	0.170264	0.1094	0.170264	0.1775	0.3161	0	0.2154	0	0.15	0.170264	0	0.4408	0	0.170264	0.2389	0.170264	0	0.170264	0.1373	0.1569	0	0.3847	0.1999	0.3061	0.170264	0.2208	0.5155	0.1504	0.1101	0.1548	0	0	0.068	0.1227	0.0811	0.170264	0	0.170264	0.170264	0.3786
TLE3_31413_AD	0.8537	0.6259	0.8442	0.6466	0.6726	0.6789	0.6511	0.758	0.4891	0.73452	0.7981	0.6531	0.6835	0.7385	0.5899	0.5156	0.6737	0.8636	0.73452	0.7333	0.7686	0.712	0.7149	0.771	0.5764	0.1851	0.8489	0.5897	0.4419	0.73452	0.8947	0.7154	0.5132	0.5148	0.73452	0.7032	0.7502	0.4653	0.5768	0.73452	0.8054	0.8652	0.4327	0.6436	1	0.7687	0.5373	0.7888	0.7958
ADPGK_31594_AD	0.1047	0.3073	0.3223	0.2724	0.3095	0.3049	0.3812	0.2889	0.2597	0.115	0.701	0.5452	0.3049	0.4296	0.3459	0.3359	0.2022	0	0.317934	0.3133	0.1798	0.2787	0.178	0.3325	0.2833	0.248	0.5541	0.34	0.408	0.4596	0.4123	0.3176	0.2633	0.3114	0	0.2218	0.4365	0.625	0.2385	0.2715	0.1759	0.3276	0.4694	0.3566	0.317934	0.2929	0.4337	0.5134	0.5691
STRA6_31688_AD	1	0.781	1	0.1878	0.2493	0.5047	0.7413	0.1759	0.7747	1	1	0.2735	0.5708	0.6078	0.737	0.2523	0.3643	1	0.6564	0.2973	0.381	0.3626	0.7076	0.1951	0.3505	0.4033	0.2629	1	0.4713	0.2089	0.3899	0.452	0.3512	0.2897	0.1733	0.761	0.3361	0.1645	0.2632	0.2784	0.2693	0.2678	0.8062	0.3247	0.8751	0.4963	0.3188	0.2141	0.1395
ULK3_31756_AD	0.4693	0	1	1	0	0.691	0.5068	0	0.4978	0	0.0199	0.0104	0	1	0.0106	0.0163	0	0.6021	0.4586	0	0.6689	0.5279	0.5474	1	0.0117	1	0.0329	1	0.5484	0.5349	0	0	0	1	1	0.0069	0.4309	0.3639	0.5516	0.5409	1	0.48	0.0054	0.5896	1	0.5174	0.023	0.3843	1
FAM219B_31794_AA	0.7373	0.867	0.6197	0.6953	1	0.9137	0.8907	0.9661	0.88	0.8029	0.7404	0.9362	1	0.7739	0.9244	0.9036	0.861035	0.7559	0.861035	0.9362	0.88	0.6914	0.8938	0.7228	0.6471	0.9194	0.9194	0.88	0.861035	1	0.9687	0.8359	0.8302	0.861035	0.9137	0.6995	0.9327	0.8552	0.6707	0.7857	0.7097	0.9137	0.958	0.8129	0.8029	0.88	0.9472	0.7793	1
SNUPN_31884_AD	0.3578	0.2671	0.3153	0.2433	0.5099	0.6119	0.4102	0.3611	0.2953	0.5212	0.24	0.4786	0.2443	0.322	0.2139	0.3262	0.2179	0.3411	0.1972	0.2591	0.4249	0.2636	0.1728	0.4899	0.2496	0.278	0.4407	0.2587	0.4555	0.3254	0.601	0.3888	0.1732	0.5028	0.2251	0.2711	0.2036	0.2558	0.252	0.1563	0.4182	0.2699	0.2908	0.4705	0	0.2682	0.2748	0.5223	0.401
FAH_32181_AD	0.2006	0.3551	0.7515	0.4783	0.6494	1	0.3381	0.3667	0.5746	0.6185	0.9596	1	0.6346	0.6185	0.3862	0.3823	0.1618	0.1988	0.5366	0.4005	0.3508	0.3667	0.218	0.5366	0.9503	0.6894	0.5711	0.496	0.8254	0.3288	0.3542	0.4911	0.4074	1	0.4242	0.6346	0.9554	0.3758	0.4069	0.8021	0.3513	0.6984	0.587	0.4911	0.4648	0.3165	0.761	0.3239	0.449
ZNF774_32485_AA	0.5833	1	1	0.9195	0.8656	0.8567	0.81	0.8829	1	1	0.9205	0.6863	0.6861	0.7783	0.9323	0.7877	0.5801	1	1	0.8509	1	0.8391	1	0.8881	0.7835	0.6341	0.7589	0.923	0.7546	1	0.6397	0.9348	0.9138	0.7411	0.6247	0.9436	0.921	0.6823	0.681	0.5751	0.9181	0.7141	0.6538	0.8351	0.7904	0.6015	0.7958	0.7479	0.7761
FES_32502_AD	0.3104	0.50926	0.2939	0.2539	1	0.3595	0.4489	0.6618	0.2782	0.50926	0.4588	0.2512	0.5104	0.5819	0.50926	0.4149	0.4959	0.7673	0.4135	0.7022	0.3815	0.567	0.2616	0.5371	0.6281	0.4095	0.50926	0.5278	0.5184	0.4773	0.6561	0.2742	0.50926	0.5519	0.50926	0.4892	0.608	0.5956	0.8646	0.4764	0.4785	0.5962	1	0.2401	1	0.6709	0.724	1	0.50926
MAN2A2_32517_AA	0.1946	0.2162	0.4093	0.133	0.3286	0.3892	0.2329	0.2046	0.1739	0.1986	0.1991	0.3124	0.2375	0.3741	0.3142	0.2595	0.3468	0.2939	0.4831	0.308	0.2857	0.3951	0.1689	0.2835	0.5794	0.3503	0.5294	0.2123	0.172	0.2967	0.3803	0.3498	0.2478	0.2944	0.3892	0.4087	0.5075	0.1508	0.3314	0.5279	0.2288	0.3957	0.4041	0.2854	0.531	0.4653	0.4932	0.19	0.1313
PRC1_32531_AD	0.7619	0.5989	0.6809	0.6707	0.4351	0.4444	0.593224	0.7399	0.593224	0.6809	0.7458	0.7134	0.5211	0.6617	0.3288	0.4706	0.8649	0.7273	0.8889	0.5846	0.4706	0.5444	1	0.717	0.7449	0.593224	0.2759	0.8627	0.593224	1	0.593224	0.593224	0.593224	0.335	0.9102	0.5902	0.8474	0.5283	0.593224	0.9215	0.7692	0.6341	0.4858	0.7364	0.593224	0.6046	0.6446	0.6809	0.3787
TTC23_32613_AA	0.2438	0.2306	0.4583	0.2733	0.2895	0.1512	0.2973	0.2556	0.1423	0.1583	0.1919	0.166	0.2418	0.1931	0.1961	0.2482	0.1479	0.2018	0.1746	0.0964	0.2313	0.2888	0.1447	0.3198	0.3607	0.311	0.1184	0.304	0.2733	0	0.1814	0.1892	0.197	0.22	0.381	0.3726	0.2131	0.2418	0.22	0.4658	0.1198	0.3158	0.4037	0.2467	0.381	0.3607	0.3379	0.313	0.2274
TTC23_32620_AD	0.7597	0.6944	0.3874	0.7734	0.6401	1	1	0.6429	0.944	0.728153	0.7867	0.728153	1	0.7079	0.4258	0.7527	0.5781	0.557	0.728153	0.7326	0.7034	0.8043	0.563	0.8811	1	0.5331	0.728153	0.6449	0.6782	1	0.6918	0.5937	0.5601	0.9092	0.6913	0.7597	0.8544	0.5455	0.2965	0.619	0.7647	1	1	0.5765	0.728153	1	0.5842	0.7042	0.7629
TTC23_32630_AD	0.7219	0.7111	0.7212	0.9479	0.5795	1	1	0.7812	0.7582	0.914407	0.9376	0.914407	1	0.8538	0.6516	0.9279	0.6942	1	0.914407	0.9147	0.8893	0.8816	0.7897	1	1	1	0.914407	0.8037	1	0.8059	1	0.8119	0.8617	1	1	1	1	0.7567	0.6687	1	1	0.8777	1	1	0.914407	1	0.8097	1	0.8435
WASH4P_32775_AD	0.7612	0.7074	0.5611	0.5189	0.5988	0.7071	0.5907	0.6687	0.566	0.8414	0.4889	0.5525	0.5186	0.5747	0.3545	0.6842	0.5666	0.5786	0.5848	0.349	0.3812	0.487	0.6958	0.6291	0.6145	0.5671	0.7721	0.5926	0.6319	0.5446	0.4836	0.5515	0.5893	0.6773	0.5239	0.502	0.3933	0.613	0.5238	0.5019	0.5399	0.4471	0.626	0.3371	0.5231	0.2801	0.6215	0.5833	0.6106
LUC7L_32845_AD	0.9491	0.905	0.9601	0.7998	0.8807	0.8471	0.8958	0.8859	0.9571	1	0.7883	0.8895	0.7476	0.9661	0.8138	0.8704	0.9379	0.9501	0.8352	0.9757	0.8152	0.8606	0.8324	0.8485	0.9326	0.9269	0.924	0.8995	0.6496	0.8271	0.9657	0.8511	0.8805	0.9424	0.8674	0.8819	0.9134	0.8739	0.9204	0.9208	0.9094	0.9681	0.9744	0.9278	0.9528	0.9393	0.9297	0.9246	0.7964
LUC7L_32847_AD	0.289	0.552	0.7979	0.302	0.5331	0.3128	0.6647	0.6473	0.6479	0.3285	0.5752	0.6915	0.6434	0.7411	0.8343	0.3687	0.5633	0.7569	0.0726	0.5961	0.1756	0.5342	0.2151	0.491	0.4396	0.466	0.2543	0.8858	0.0599	0.3382	0.8677	0.7798	0.4901	0.4949	0.3088	0.7495	0.6687	0.4532	0.317	0.7011	0.399	0.7011	0.7285	0.6725	0.7886	0.8211	0.667	0.4261	0.5353
LUC7L_32849_AD	0.0467	0.1641	0.2642	0.1382	0.2397	0.1064	0.379	0.2937	0.0969	0	0.4113	0.3369	0.4935	0.1588	0.6444	0.1451	0.141	0.2491	0.1025	0.0529	0.0619	0.2258	0.0487	0.2603	0.088	0.133	0.0841	0.6472	0.0521	0.1294	0.2847	0.4772	0.1481	0.0803	0.1165	0.3594	0.2057	0.1671	0.0752	0.2336	0.0934	0.1415	0.1077	0.1888	0.2274	0.3332	0.1884	0.1095	0.372
FAM173A_32964_AA	0.451	0.5112	0.7014	0.3928	0.423	0.4133	0.4549	0.5139	0.6346	0.1723	0.5862	0.4507	0.3642	0.5432	0.813	0.4531	0.2347	0.748	0.5602	0.7009	0.4976	0.426	0.256	0.4213	0.793	0.6158	0.6936	0.5028	0.436	0.4995	0.6716	0.412	0.4357	0.7081	0.5528	0.5325	0.611	0.6369	0.3943	0.6672	0.5054	0.7428	0.5735	0.6865	0.6137	0.8162	0.6709	0.449	0.247
UBE2I_33057_AD	0.2884	0.2109	0.1419	0.196	0.148	0.088	0.1943	0.3362	0.4477	0.215289	0.2245	0.1118	0.215289	0.3667	0.3982	0.2601	0.2047	0.0702	0.215289	0.1676	0.215289	0.2335	0.3362	0.2289	0.0574	0.1419	0.0397	0.1618	0.1784	0.6587	0.188	0.2785	0.2712	0.1264	0.1801	0.1943	0.1943	0.169	0.1104	0.3127	0.0818	0.083	0.2245	0.1512	0.1512	0.1807	0.3105	0.5657	0.1264
UBE2I_33059_AD	1	1	0.5342	0.5615	1	1	1	1	0.4237	0.4809	0.7393	0.5944	0.3806	0.5181	0.3752	1	1	1	0.842861	1	0.2093	1	1	1	1	1	1	1	0.5647	0.665	1	0.5908	1	1	1	1	1	1	1	1	1	1	1	1	1	1	1	0.0732	1
UNKL_33085_AD	0.0644	0.0936	0.345	0.2366	0.1712	0.1942	0	0.1418	0.4818	0.212069	0.0978	0.3516	0.1622	0.399	0.3434	0.3516	0.4818	0.2077	1	0.3826	0.0424	0.2634	0.212069	0.2133	0.1041	0.0936	0.212069	0.3653	0.3314	0.358	0.3675	0.2038	0.2052	0.2366	0.0491	0.5035	0.4934	0.0748	0.1103	0.1812	0.0851	0.2224	0.3298	0.1916	0.458	0.3406	0.2627	0.0687	0.0333
RNPS1_33255_AD	0.6962	0.5856	0.3734	0.1977	0	0.2149	0.3484	0.1896	0.4276	0.315607	0.2931	0.3957	0.0743	0.2911	0.3879	0.3084	0.3591	0.221	0.315607	0.5095	0.3143	0.3965	0.315607	0.4783	0	0.203	0.315607	0.1864	0.315607	0.3673	0.6702	0.3484	0.2706	0.4764	0.3744	0.4426	0.4264	0.6518	0.3775	0.5168	0.2405	0.5684	0.4194	0.3851	0.315607	0.5058	0.4566	0.311	0.1628
RNPS1_33256_AD	0.285007	0.6003	0	0.1486	0.2534	0.4418	0	0.4272	0.5359	0.2804	0	0.285007	0.2062	0.3038	0.2519	0.2831	0.285007	0.2248	0.285007	0.6235	0.3021	0.1486	0.2968	0	0.3546	0.285007	0.285007	0.1958	0.2062	0.285007	0.3419	0.2163	0.2451	0.285007	0.5259	0.3818	0.2497	0.285007	0.1722	0.2451	0.1832	0.2337	0.2006	0.2451	0.6945	0.521	0.3429	0.3174	0.1713
PKMYT1_33330_AA	0.7825	0.8892	0.5755	0.6009	0.5767	0.6992	0.5453	0.5673	1	0.7223	0.6888	0.6866	0.5672	0.7948	0.8023	0.6888	0.6035	0.6241	0.6771	0.718	0.7715	0.7704	1	0.689	0.5861	0.744	0.743	0.9466	0.8023	0.7857	0.7135	0.8956	0.8233	0.6353	0.7346	0.8038	0.7153	0.6513	0.492	0.6834	0.8925	0.6653	0.8275	0.6501	0.718	0.7229	0.6501	0.8109	0.8158
TNFRSF12A_33349_AD	0.576272	0.576272	0.576272	0.7311	0.7219	0.6071	1	0.6281	0.576272	0.576272	1	0.4865	0.8504	0.7627	0.587	0.576272	0.576272	0.576272	0.576272	0.5973	0.6337	0.5382	0.2537	0.576272	0.7876	0.5266	0.9192	0.576272	0.5357	0.576272	0.576272	0.4908	0.5835	0.5382	0	0.4858	0.576272	0.6642	0.5528	0.9488	0.6138	0.8144	0.73	0.6356	0.3904	0.6812	0.7517	0.5725	0.4777
HCFC1R1_33353_AA	0.5071	0.322	0.5056	0.5999	0.5098	0.5875	0.4418	0.5711	0.5428	0.3642	0.416	0.6921	0.4919	0.3877	0.3285	0.5455	0.6128	0.3596	0.5256	0.7329	0.5837	0.6038	0.5196	0.6978	0.6695	0.3351	0.5801	0.3325	0.3989	0.3734	0.6465	0.4987	0.6128	0.7135	0.4806	0.3209	0.628	0.5692	0.4406	0.5482	0.6393	0.608	0.7071	0.5544	0.5929	0.4401	0.5477	0.7644	0.5417
IL32_33376_AD	0.4789	0.601691	0.4776	0.4977	0.5621	0.5674	0.7637	0.5715	0.4169	0.6847	0.5853	0.491	0.5906	0.7474	1	0.561	0.6142	0.6292	0.4853	0.6846	0.6517	0.6543	0.714	0.6398	0.6225	0.5572	0.695	0.601691	0.5311	0.5522	0.5573	0.7116	0.5241	0.6344	0.4641	0.6622	0.5472	0.5304	0.6919	0.5315	0.7222	0.6728	0.5762	0.58	0.6996	0.6459	0.566	0.44	0.7255
IL32_33439_AD	0.1855	0.1545	0.1671	0.6676	0.4732	0.5919	0.2921	0.3796	0.2655	0.39569	0.3062	0.3283	0.6436	0.0812	0.2693	0.527	0.579	0.2426	0.6912	0.5891	0.5091	0.3036	0.3252	0.2385	0.3601	0.3964	0.1825	0.193	0.4016	0.6524	0.4727	0.2599	0.3934	0.3448	0.2211	0.2757	0.4626	0.4534	0.4051	0.4796	0.1377	0.4472	0.4331	0.4656	0.3678	0.3213	0.6197	0.1617	0
ZNF205_33452_AA	0.9056	0.8279	0.4935	0.7847	0.8119	0.6286	0.5517	0.8	0.5038	0.713411	0.6104	0.8664	0.5572	0.8088	0.807	0.6936	0.8575	0.8152	0.5683	0.6191	0.5129	0.6206	0.7128	0.7083	0.6984	0.8014	0.646	0.7723	0.5748	1	0.4135	1	0.7846	0.8122	0.8354	0.8445	0.8122	0.7972	0.8058	0.6961	0.7859	0.6214	0.6627	0.776	0.885	0.7767	0.5485	0.8354	0.7711
ZNF200_33462_AA	0.6592	0.8376	0.7437	0.7755	0.5919	0.6885	0.8073	0.5687	0.5632	0.72559	0.6351	1	0.8713	0.7437	0.7303	0.6423	0.72559	0.7668	0.72559	0.7206	0.8131	0.6929	0.72559	0.6592	0.6592	0.72559	0.72559	0.6929	0.72559	0.72559	0.6851	0.6423	0.72559	0.7719	0.8627	0.8417	0.7074	0.9263	0.8788	0.6851	0.7558	0.7437	0.78	0.6351	0.72559	0.6322	0.5919	0.6592	0.6171
ZNF200_33464_AD	0.7147	0.3656	0.5244	0.5061	0.5839	0.3908	0.4192	0.4291	0.7302	0.6672	0.3865	0.5561	0.3338	0.3524	0.8614	0.575	0.3338	0.5339	0.617869	0.3524	0.6944	0.4921	0.546	0.6672	0.6347	0.7373	0.617869	0.6615	0.617869	0.445	0.3028	0.3961	0.3338	1	0.4053	0.7064	0.3908	0.7227	0.4851	0.2687	0.8249	0.445	0.6944	0.9002	1	0.6993	0.6434	0.7798	0.6557
ZNF200_33465_AD	0.8317	0.8115	1	1	1	1	0.7783	0.7892	1	1	1	1	1	1	1	0.836	1	0.8038	0.91933	0.7735	0.8569	0.7055	1	1	1	1	0.91933	1	0.91933	1	1	1	1	1	1	0.8755	0.8452	0.8811	1	1	1	0.8527	0.8634	1	1	1	1	0.8264	1
NAA60_33543_AD	0.4251	0.5288	0.4731	0.3686	0.3222	0.6423	0.3099	0.4137	0.1522	0.329242	0.5116	0.3528	0.4731	0.447	0.4024	0.4096	0.329242	0.3951	0.1614	0.6423	0.4547	0.3099	0.3817	0.329242	0.3595	0.3099	0.2588	0.397	0.2953	0.4731	0.293	0.3099	0.386	0.1664	0.297	0.4994	0.1717	0.1214	0.3099	0.3438	0.159	0.5065	0.3099	0.2462	0.3099	0.2699	0.5739	0.2407	0.4731
DNASE1_33615_AA	0.945	0.8732	0.6015	0.6952	0.6271	0.8106	0.7989	0.445	0.7807	0.7271	0.6378	0.7852	0.7199	0.5654	0.8445	0.5591	0.5318	0.6052	1	0.6043	1	0.779	1	0.7575	0.6754	0.792	0.6388	0.6618	1	0.4862	0.5092	0.4286	0.502	0.8519	0.49	0.5529	0.7846	1	0.7649	1	0.7194	0.5715	0.7117	0.4203	0.779	0.6547	0.6227	0.6821	1
CORO7_33669_AD	0	0.169171	0.0424	0.171	0.1471	0.2136	0.1933	0.1809	0.0946	0.169171	0.1412	0.0682	0.2044	0.2214	0.1109	0.1665	0.1052	0.1478	0.1105	0.2832	0.1243	0.2368	0	0.208	0.2674	0.1213	0.0899	0.3438	0.1322	0.1854	0.2007	0.259	0.3892	0.1061	0.2924	0.1324	0.3066	0.3973	0.172	0	0.2651	0.0513	0.3346	0.1229	0.3883	0.1991	0.2778	0.2055	0.1196
NMRAL1_33737_AD	0.7599	0.658	0.6269	0.4712	0.5669	0.8805	0.5479	0.6327	0.7953	0.7177	0.6271	0.6323	0.5511	0.7828	0.6316	0.5955	0.6039	0.7841	0.7074	0.7305	0.6587	0.1711	0.5791	0.1759	0.7912	0.8316	0.6459	0.6671	0.7405	0.4228	0.5564	0.4995	0.3155	0.6718	0.8432	0.7832	0.5733	0.5427	0.7457	0.8005	0.622	0.6958	0.6205	0.6319	0.5886	0.6747	0.7076	0.7922	0.635
NMRAL1_33739_AD	0.5247	0.7253	0.3682	0.6974	0.3959	0.5819	0.3596	0.4831	0.7797	0.3139	0.6556	0.629	0.4913	0.453	0.7217	0.4581	0.8466	0.7857	0.4587	0.4801	0.481	0.1257	0.4224	0.3138	0.4646	0.4842	0.4623	0.7257	0.4778	0.3089	0.3789	0.4418	0.2259	0.5505	0.4699	0.5837	0.7321	0.5841	0.3874	0.5243	0.6535	0.7585	0.513	0.4277	0.4813	0.492	0.5584	0.4889	0.5109
NMRAL1_33740_AD	0.268	0.5894	0.2713	0.7411	0.3596	0.1713	0.3691	0.3589	0.502	0.1463	0.5388	0.5231	0.4766	0.2011	0.6245	0.3746	0.7871	0.5118	0.2664	0.2684	0.3219	0.4499	0.37	0.6642	0.1873	0.1771	0.3229	0.5794	0.2407	0.3877	0.3369	0.4499	0.4105	0.3884	0.1429	0.2787	0.6741	0.5406	0.1881	0.2272	0.5431	0.5955	0.407	0.3283	0.4015	0.3327	0.3453	0.2205	0.3935
CLEC16A_34006_AD	0.4925	0.7069	0.531	0.6906	0.66	0.6697	0.6418	0.4569	0.8381	0.6402	0.5526	0.7213	0.4107	0.8622	0.7021	0.6078	0.6875	0.7275	0.671488	0.6504	0.7035	0.66	0.7952	0.7371	0.5789	0.7444	0.6937	0.7726	1	0.3267	0.618	0.7054	0.7828	0.4158	0.6471	0.8632	0.4696	0.8568	0.7545	0.8381	0.5641	0.8103	0.6388	0.6418	0.671488	0.5773	0.6294	0.6626	0.6331
NPIPA5_34149_AD	0.4005	0.43	0.3776	0.3536	0.242	0.2878	0.3639	0.3611	0.4746	0.2433	0.4269	0.2592	0.2568	0.4365	0.5321	0.3498	0.4326	0.3704	0.1264	0.3801	0.3027	0.4056	0.2032	0.3301	0.3205	0.1804	0.0897	0.3516	0.1298	0.4251	0.3708	0.3787	0.4074	0.2143	0.3855	0.4248	0.5172	0.3321	0.166	0.3467	0.4059	0.4144	0.5653	0.4589	0.2727	0.5245	0.5147	0.4071	0.3877
RPS15A_34255_AA	0.712261	0.712261	0.6251	0.6578	0.712261	0.712261	0.8871	0.6659	0.712261	0.712261	0.8474	0.6201	0.7302	0.8977	0.7356	0.4692	0.712261	0.7138	0.881	0.9141	0.8177	0.654	0.712261	0.5492	0.6563	1	0.6772	0.4443	0.748	0.8411	0.712261	0.9236	0.712261	0.8549	0.719	0.6135	0.659	0.8507	0.5283	0.907	0.9166	0.4604	0.7949	0.5698	0.2753	0.5339	0.6822	0.7735	0.7493
ERI2_34394_AA	0.7322	0.8831	0.9037	0.8773	0.8711	0.7926	0.8935	0.8142	0.951	0.7322	0.9525	0.7429	0.8052	0.9136	0.8745	0.8068	0.8219	0.801	0.812377	0.8739	0.7254	0.7239	0.8173	0.804	0.6654	0.8483	1	0.8956	0.6131	0.7628	0.7611	0.7878	0.9111	0.7052	0.7575	0.6486	0.8682	0.8679	0.8428	0.849	0.9484	0.7958	0.7489	0.7004	0.9551	0.8123	0.8763	0.8666	1
LYRM1_34407_AD	0.8354	0.8839	0.8664	0.7883	0.8088	1	0.8088	0.8664	0.9254	0.7563	0.8612	0.7813	0.7857	0.7767	0.9126	0.7383	1	0.8713	0.7383	0.7813	0.769866	0.8354	1	0.7979	0.9186	0.4583	0.8943	0.7015	0.7979	0.7979	0.7719	0.7857	0.8494	0.6123	0.88	0.7303	0.6573	0.6286	0.7383	0.7282	0.6638	0.8536	0.8246	0.7174	0.6411	0.792	0.7857	1	1
NPIPB4_35516_AD	0.5942	0.8746	0.8234	0.7711	0.8444	0.6586	0.7173	0.8394	0.9257	0.6998	0.8726	0.5862	0.7886	0.6141	0.8241	0.8073	0.8416	0.6703	0.77431	0.76	0.7824	0.5457	0.77431	1	0.9522	0.77431	1	0.7408	0.77431	0.8034	0.8646	0.7905	0.6945	0.816	0.87	0.6888	0.8198	0.7676	0.7907	0.7564	0.7967	0.7671	0.7245	0.7871	0.628	0.8025	0.7479	0.6752	0.7451
GGA2_35589_AA	0.0842	0.1073	0.3167	0.1067	0.2656	0.1474	0.096	0.1321	0.154	0.1469	0.123	0.3728	0.1785	0.3424	0.1644	0.1829	0.2229	0.0978	0.0717	0.2263	0.2386	0.3603	0.1125	0.18	0.1721	0.1551	0.1247	0.3162	0.0839	0.2989	0.3826	0.2474	0.149	0.3114	0.3599	0.3158	0.4133	0.193	0.1913	0.5383	0.2353	0.4101	0.4604	0.2125	0.7013	0.4039	0.361	0.1078	0.1019
PRKCB_35641_AA	1	1	1	0.8287	1	0.5909	0.6928	1	0.6602	0.7904	0.7782	1	0.8912	0.8336	1	1	0.8035	1	0.9198	0.9161	0.9489	1	0.4446	0.7918	0.9056	0.8374	0.8402	0.662	0.8208	1	0.521	1	1	0.8889	1	1	0.8189	0.8828	0.8645	1	0.728	1	1	1	1	1	0.9248	0.8466	1
ATXN2L_35835_AA	0.302	0.3939	0.7483	0.524	0.4747	0.8371	0.7649	0.721	0.496648	0.496648	0.3625	0.4801	0.496648	0.4096	0.2004	0.4885	0.496648	0.4274	0.4533	0.6166	0.6024	0.6539	0.496648	0.3985	0.4916	0.1182	0.3028	0.5486	0.3633	0.496648	0.1809	0.5452	0.4392	0.5784	0.3589	0.7001	0.6175	0.5769	0.5197	0.3946	0.4364	0.6953	0.3335	0.4556	0.5054	0.4483	0.2729	0.6075	0.525
ATXN2L_35836_AD	0.2295	0.1667	0.7427	0.3231	0.3258	0.677	0.378155	0.4751	0.4184	0.4492	0.378155	0.1391	0.6544	0.1643	0	0.3856	0.6145	0.4183	0.275	0.2442	0.4623	0.3653	0.5103	0.2405	0.2583	0.3195	0.31	0.2775	0.2979	0.8002	0.2887	0.4649	0.1487	0.4094	0.1942	0.1327	0.5145	0.3342	0.3508	0.1643	0.2203	0.626	0.5498	0.5773	0.3267	0.4849	0.5317	0.4197	0.4681
ATXN2L_35839_AA	0.4154	0.8487	0.6633	0.5357	0.4652	0.6046	0.6403	0.4704	0.452956	0	0.2968	0.4572	0	0.4199	0.7438	0.4867	0.452956	0.3346	0.3631	0.6527	0.4881	0.4108	0	0.3613	0.7257	0.2095	0.3572	0.4428	0.2932	0	0.238	0.4867	0.6162	0.4224	0.3637	0.6734	0.4596	0.7065	0.477	0.5059	0.2374	0.524	0.411	0.3101	0.5861	0.3795	0.1936	0.4373	0.2567
ATXN2L_35842_AA	0.666	0.9102	0.4502	0.5349	0.5331	0.2639	0.500697	0.2964	0.8667	0.3918	0.4827	0.5252	0.2544	0.5306	0.9279	0.53	0.5648	0.4413	0.4417	0.5638	0.4252	0.2909	0.2454	0.5047	0.7519	0.7127	0.6022	0.4164	0.4449	0.2113	0.6151	0.468	0.6795	0.3787	0.5372	0.4987	0.3694	0.6855	0.5114	0.6319	0.3046	0.353	0.6033	0.3845	0.6129	0.4674	0.4223	0.3939	0.2744
ATXN2L_35844_AD	0.279579	0.279579	0.2366	0.2652	0.4031	0.3732	0.2101	0.2685	0.279579	0	0.2099	0.2382	0.279579	0.2301	0.279579	0.1868	0.279579	0.1762	0.3333	0.6493	0.4146	0.23	0.279579	0.3276	0.3426	0.0921	0.1511	0.2843	0.094	0.279579	0.279579	0.4063	0.1206	0.324	0.234	0.3987	0.3919	0.4192	0.2879	0.3001	0.1469	0.3058	0.1716	0.1819	0.2627	0.1722	0.0652	0.3673	0.1801
ATXN2L_35847_AA	0.674	0.53285	0.5732	0.5383	0.4404	0.602	0.6169	0.4472	0.3277	0.7494	0.2976	0.4689	0.31	0.475	0.53285	0.6202	0.4755	0.5442	0.4947	0.3272	0.4753	0.5555	0.53285	0.4313	0.4849	0.3916	0.5163	0.523	0.6206	0.3848	0.2261	0.4313	0.6928	0.456	0.564	0.5807	0.4682	0.4688	0.5116	0.6033	0.5691	0.6108	0.6455	0.6347	0.5915	0.6876	0.5834	0.4451	0.5614
ATXN2L_35853_AD	0.3775	0.1149	0.1718	0.2825	0.3902	0.3732	0.2051	0.2552	0.0649	0.623	0.2246	0.2476	0.2985	0.2776	0.0447	0.2911	0.4324	0.3392	0.4773	0.3125	0.393	0.3423	0.4674	0.4025	0.1669	0.2017	0.259	0.3574	0.2865	0.37	0.2936	0.3698	0.1635	0.3708	0.4001	0.3126	0.4063	0.2083	0.3058	0.3799	0.4216	0.3873	0.3599	0.4727	0.2627	0.4233	0.2881	0.3807	0.4583
SH2B1_35884_AD	0.4354	0.3289	0.5955	0.736	0.5693	0.5516	0.4376	0.5352	0.296	0.5654	0.3568	0.4785	0.3621	0.7522	0.4669	0.834	0.7517	0.469	0.519925	0.196	0.519925	0.5627	0.3645	0.3291	0.4388	0.3868	0.5247	0.4824	0.4568	0.5624	0.7116	0.5132	0.4701	0.519925	0.4846	0.5691	0.5477	0.711	0.559	0.2746	0.3672	0.4178	0.3772	0.5419	0.853	0.6453	0.3446	0.5386	0.413
KIF22_35935_AD	0.1346	0.0551	0.1089	0.0407	0.067	0.0111	0.1371	0.0729	0.0415	0.1318	0.0216	0.1209	0.0968	0.1277	0.041	0.0728	0.0374	0.0909	0.0948	0.0232	0.0469	0.0683	0.054	0.0807	0.0463	0.1357	0.0477	0.0895	0.1877	0.0337	0.0988	0.0809	0.0916	0.0401	0.1089	0.1823	0.1104	0.0879	0.0395	0.1724	0.0598	0.0917	0.0764	0.0495	0.3632	0.1636	0.1217	0.0359	0.0255
C16orf93_36186_AA	0.2663	0.5877	0.4694	0.4362	0.5985	0.1147	0.5474	0.4425	0.1678	0.3121	0.3121	0.5142	0.4757	0.4049	0.4839	0.4672	0.3121	0.2841	0.6517	0.5505	0.5896	0.4222	0.1759	0.3932	0.6109	0.4425	0.5452	0.4579	0.3395	0.3958	0.694	0.5764	0.3769	0.5985	0.5314	0.5864	0.6447	0.454	0.2841	0.4844	0.2447	0.5203	0.509	0.6503	0.6532	0.5375	0.7637	0.3618	0.239
HSD3B7_36213_AA	0.1798	0.417	0.3244	0.2732	0.3957	0.354	0.3066	0.3851	0.2003	0.2946	0.5561	0.5937	0.2385	0.6327	0.4844	0.3635	0.3338	0.3996	0.2562	0.4424	0.3631	0.7434	0.2385	0.3388	0.4683	0.3397	0.3196	0.6103	0.2385	0.5044	0.2768	0.4291	0.3048	0.4722	0.2636	0.6103	0.5819	0.3338	0.4042	0.6706	0.3576	0.6619	0.3851	0.5482	0.417	0.5628	0.5888	0.2266	0.6005
ZNF720_36288_AA	0.3169	0.2014	0.0601	0.1575	0.1101	0.21	0.1011	0.1094	0.1393	0.161	0.105	0.1652	0	0.2079	0.1605	0.1514	0.141748	0.2915	0.1892	0.1822	0	0.2084	0	0	0.143	0	0.0311	0	0	0	0.0745	0.0927	0	0.0648	0	0.1834	0	0.1279	0.1339	0.2261	0.1439	0.1357	0.2054	0.1867	0	0.0949	0.3437	0.0824	0
MT1E_36480_AA	0.3187	0.7008	0.5761	0.412728	0.3641	0.7067	0.4178	0.5933	0.64	0.2288	0.3966	0.5075	0.4992	0.5737	0.7607	0.2383	0.5826	0.5654	0.4848	0.7255	0.4803	0.412728	0.134	0.4075	0.4405	0.4178	0.3469	0.4491	0.6289	0.4016	0.5331	0.2631	0.6829	0.5992	0.1449	0.2987	0.7683	0.4671	0.1654	0.3351	0.2082	0.5495	0.3185	0.2625	0.7149	0.4122	0.8289	0.3488	0.4582
MT1G_36491_AA	0.8028	0.8049	0.8032	0.9631	0.4495	0.706998	0.8073	0.8198	0.8187	0.8091	0.8112	0.7717	0.8226	0.8064	0.3047	0.8341	0.8297	0.8209	0.8034	0.8286	0.8364	0.706998	0.8173	0.8351	0.8295	0.792	0.8323	0.7956	0.4469	0.2773	0.8141	0.8108	0.8088	0.4916	0.9603	0.8269	0.7655	0.0403	0.4353	0.7954	0.853	0.4583	0	0.6094	0.6232	0.7888	1	0.833	0.8012
RSPRY1_36537_AD	0.4082	0.2907	0.4391	0.3678	0.3438	0.3388	0.3735	0.2744	0.4543	0.3095	0.3628	0.2842	0.4078	0.3211	0.3259	0.4021	0.3095	0.3341	0.403081	0.3934	0.4391	0.6577	0.4505	0.3689	0.335	0.1402	0.4346	0.3715	0.2776	0.5261	0.3224	0.2899	0.2282	0.3741	0.3224	0.3657	0.2701	0.3266	0.5897	0.2276	0.3068	0.4258	0.3904	0.2918	0.3388	0.4446	0.4698	0.5403	0.4827
SETD6_36663_AA	0.1497	0.2407	0.4874	0.1392	0.2102	0.0395	0.1767	0.2767	0.1235	0.1288	0.3222	0.3568	0.2828	0.2283	0.1376	0.3302	0.2407	0.3173	0.3073	0.3423	0.2334	0.1763	0	0.297	0.1617	0.3456	0.535	0.2455	0.1288	0.3813	0.297	0.3849	0.3222	0.3966	0.3184	0.4596	0.4803	0.2374	0.1843	0.4421	0.3161	0.3598	0.156	0.3604	0.5401	0.571	0.4731	0.1978	0.3456
CES4A_36920_AD	0.2895	0.2895	0.278031	0.4231	0.389	0	0.071	0.1779	0.2895	0.278031	0.5168	0.3591	0.4162	0.1371	0.278031	0.278031	0.278031	0.278031	0.278031	0.4231	0.1713	0.278031	0.4465	0.0418	0.2136	0.3226	0.278031	0.3294	0.603	0.278031	0.2963	0.2642	0.3793	0.1325	0.3284	0.2588	0.2747	0.1509	0.234	0.2166	0.0803	0.2099	0.1707	0.1524	0.3322	0.2469	0.2755	0.2764	0.1292
HSF4_36942_AA	0.7664	1	0.9742	1	0.9107	1	0.8426	0.8405	1	0.8045	0.7428	0.9185	0.8658	1	0.9678	1	1	0.8456	1	1	0.7843	1	0.916258	0.8695	0.8123	0.7066	1	0.9278	1	0.7406	0.888	0.8817	0.916258	1	0.8643	0.832	1	1	1	1	0.8671	0.8529	0.952	1	0.9418	0.8352	1	1	0.7727
HSF4_36944_AA	0.2764	0.6651	0.2846	0.3143	0.4012	0.6735	0.5789	0.435	0.4331	0.3591	0.4899	0.5531	0.3866	0.3887	0.3729	0.5789	0.2429	0.4561	0.3929	0.4566	0.3866	0.3909	0.5789	0.2874	0.4925	0.4622	0.5132	0.3735	0.4783	0.4302	0.3866	0.4244	0.4783	0.4968	0.4622	0.4207	0.4598	0.4187	0.5116	0.2721	0.4598	0.3143	0.4012	0.4732	0.3431	0.4361	0.3944	0.4783	0.3459
KIAA0895L_36958_AD	1	0.8534	0.8557	1	1	0.8462	0.618	0.7857	0.7611	1	0.89	0.7213	0.7545	0.8381	0.7082	0.7639	0.7882	0.8291	0.7611	0.7806	0.7371	0.8534	0.7611	0.7611	0.7639	0.8661	1	0.6832	0.8191	0.5641	0.8961	0.7082	0.8291	1	0.88	0.6631	0.6432	0.8272	0.8118	0.7952	0.66	0.6709	0.7162	0.7952	0.8638	0.7458	0.7302	0.7371	1
ZFP90_37236_AA	0.4862	0.4624	0.6652	0.3637	0.3212	0.4862	0.4076	0.269	0.4677	0.461353	0.6039	0.3782	0.4478	0.6852	0.455	0.4308	0.3212	0.4764	0.461353	0.4746	0.5125	0.646	0.1913	0.3052	0.4478	0.461353	0.461353	0.4862	0.461353	0.4862	0.406	0.4458	0.5062	0.51	0.0984	0.4701	0.3868	0.5727	0.3868	0.5247	0.4497	0.4308	0.3649	0.5946	0.2211	0.4862	0.4069	0.4964	0.3557
CHTF8_37268_AD	0.2591	0.1138	0.4843	0.4137	1	0.284822	0.1222	0.2126	0.2751	0.284822	0.2167	0.4631	0.1152	0.2474	0.3383	0.1297	0.2439	0.1241	0.2446	0.3945	0.2202	0.2079	0.0507	0.196	0.4924	0.3227	0.284822	0.3121	0.1238	0.1521	0.3764	0.2454	0.2193	0.6365	0.2763	0.0561	0.1974	0.1197	0.1852	0.7211	0.1599	0.2521	0.3241	0.225	0.4447	0.2618	0.3765	0.5971	0.284822
CHTF8_37272_AA	0.2366	0.3496	0.3993	0.2406	0.1902	0.153	0.2454	0.176	0.5605	0.238549	0.4014	0.7893	0.3101	0.5142	0.3301	0.1318	0.1102	0.1948	0.238549	0.2859	0.2543	0.1469	0.1138	0.1958	0.3598	0.2289	0.0674	0.3787	0.1278	0.1354	0.3975	0.3102	0.4099	0.2378	0.4224	0.1097	0.3337	0.2772	0.1781	0.2057	0.0762	0.6048	0.3266	0.13	0.7078	0.4166	0.3174	0.1551	0.1544
ZNF23_37444_AD	0.4524	0.558	0.1436	0.3826	0.1632	0.3037	0.3427	0.4848	0.5081	0.3692	0.3435	0.3826	0.8396	0.2109	0.45	0.3955	0.3037	0.348	0.381256	0.3021	0.2561	0.4465	0.4524	0.4404	0.5293	0.3826	0.7126	0.3146	0.381256	0.2561	0.7181	0.1839	0.3455	0.4078	0.2384	0.2279	0.4037	0.4696	0.2243	0.2451	0.5039	0.2924	0.3287	0.3406	0.2229	0.3059	0.3455	0.2497	0.4908
ZNF19_37456_AA	0.8034	0.7372	0.512	0.5906	0.6433	0.8707	0.6977	0.7372	0.6839	0.7315	0.6715	0.6757	0.5459	0.5332	0.7937	0.5358	0.3754	0.7195	0.663034	0.4052	0.663034	0.6036	0.6955	0.722	0.5459	0.4449	0.7937	0.5459	0.663034	0.663034	0.5459	0.7645	0.6433	0.8347	0.1938	0.419	0.6688	0.5619	0.6205	0.3247	0.7063	0.5103	0.4136	0.8249	0.663034	0.5332	0.6187	0.6658	0.8964
ZNF821_37504_AD	0.5642	0.5607	0.4679	0.563	0.4989	0.5013	0.4759	0.4474	0.5869	0.3749	0.3097	0.4199	0.5431	0.585	0.3868	0.5545	0.5523	0.4114	0.3901	0.6219	0.5324	0.5081	0.4239	0.4354	0.4628	0.6392	0.4513	0.6247	0.5747	0.8638	0.3119	0.4845	0.5381	0.679	0.6955	0.3812	0.461	0.5523	0.5622	0.3848	0.2914	0.4205	0.573	0.3868	0.6361	0.4162	0.6076	0.4487	0.4818
LDHD_37582_AA	0.5002	0.4752	0.7424	0.6727	0.6624	0.547671	0.4567	0.4164	0.5954	0.5285	0.6014	0.547671	0.5047	0.8043	0.4658	0.5285	0.296	0.5684	0.4567	0.547671	0.4567	1	0.5765	0.4066	0.3325	0.5285	0.547671	0.4521	0.3592	0.5022	0.4204	0.5195	0.6456	0.547671	0.547671	0.5569	0.547671	0.8177	0.6855	0.6379	0.4397	0.5736	1	0.6916	0.4397	0.5836	0.547671	0.6624	0.547671
BCAR1_37601_AD	1	1	1	1	1	1	1	1	1	0.5235	1	1	1	1	1	0.5582	1	0.8183	1	0.5472	1	1	1	1	1	1	1	0.8433	1	1	0.725	0.5472	1	1	1	1	1	1	1	0.606	0.5357	1	1	1	1	1	0.6976	1	1
TMEM170A_37613_AD	0.543	0.4682	0.4728	0.6313	0.6833	0.5501	0.5934	0.4702	0.5667	0.49	0.701	0.4991	0.5836	0.591	0.5357	0.4435	0.5316	0.6021	0.5285	0.7394	0.4616	0.4683	0.4767	0.4716	0.6916	0.9098	0.6702	0.5201	0.5169	0.7824	0.6175	0.4763	0.3996	0.4556	0.5276	0.6613	0.6577	0.4021	0.4056	0.6271	0.3848	0.571	0.6089	0.4582	0.7019	0.556	0.3993	0.4644	0.539
TMEM231_37621_AA	0.1564	0.4233	0.2002	0.3614	0.2418	0.3167	0.4548	0.3265	0.4123	0.8622	0.3523	0.4101	0.3491	0.502	0.4635	0.2143	0.3516	0.4025	0.324533	0.2943	0.2943	0.3362	0.1668	0.3032	0.1221	0.0495	0.324533	0.4401	0.2749	0.5558	0.3057	0.3875	0.3249	0.3099	0.404	0.4305	0.4682	0.1254	0.2773	0.2068	0.2274	0.61	0.3721	0.1859	0.324533	0.3491	0.3817	0.2002	0.3194
COX4I1_37904_AA	0.3206	0.7191	0.4248	0.4719	0.413294	0.413294	0.413294	0.3005	0.5579	0.413294	1	0.5346	0.2262	0.4829	0.2956	0.3391	0.413294	0.1795	0.6072	0.413294	0.413294	0.3778	0.3034	0.413294	0.3886	0.2119	0.413294	0.6368	0.5032	0.5231	0.1736	0	0.3639	0.5016	0	0.4173	0.413294	0.2823	0.6173	0.568	0.3371	0.179	0.146	0.3289	0.3789	0.413294	0.2293	0.413294	0.2268
BANP_37990_AA	0.7252	0.7139	0.6747	0.7496	0.5896	0.6603	0.5944	0.7139	0.6173	0.669787	0.6226	0.5275	0.683	0.553	0.7246	0.6135	0.5258	0.7898	0.6558	0.7313	0.7075	0.6792	0.6447	0.4957	0.6298	0.5412	0.7139	0.7313	0.8226	0.7689	0.5645	0.4892	0.784	0.784	0.8251	0.7075	0.6086	0.7392	0.7313	0.7075	0.7488	0.5474	0.5975	0.6329	0.5645	0.7023	0.6447	0.6298	0.6275
ZNF276_38139_AD	0.5735	0.7026	0.4084	0.6404	0.6197	0.7359	0.7	0.5807	0.6685	0.8544	0.6341	0.5707	0.5038	0.5399	0.7659	0.5901	0.456	0.6814	0.4944	0.5815	0.569	0.5557	0.6311	0.6413	0.5986	0.4869	0.6076	0.4112	0.6471	0.6725	0.5354	0.55	0.5946	0.7196	0.6471	0.5173	0.5641	0.6025	0.5329	0.5602	0.5116	0.569	0.6298	0.5757	0.4014	0.5055	0.5946	0.5066	0.6875
GAS8_38205_AA	0	0.107	0.4989	0.1764	0.1493	0.1147	0.1644	0.1943	0.0785	0.1382	0.1952	0.3112	0.1731	0.3595	0.0346	0.3148	0.1396	0.2015	0.3273	0.409	0.1871	0.1676	0.1177	0.4444	0.1887	0.2801	0.2756	0.3202	0.0745	0.071	0.1203	0.1905	0.1464	0.4133	0.1788	0.3197	0.2656	0.3925	0.2561	0.2363	0.3133	0.4341	0.2012	0.2463	0.2902	0.3506	0.2427	0.1234	0.2008
GAS8_38206_AA	0.0751	0.0466	0.4032	0.1358	0.177	0.2355	0.1247	0.1999	0.0925	0	0.0502	0	0.0887	0.1877	0.2095	0.2698	0	0.2354	0.206104	0.3565	0.1248	0.2012	0	0.2589	0.2139	0.084	0.143	0.2216	0.059	0.2673	0.2917	0.2229	0.122	0.4005	0.1487	0.0542	0.1273	0.4109	0.1743	0.3192	0.3541	0.3865	0.184	0.1793	0.34	0.494	0.1616	0.2833	0.2593
SCARF1_38359_AD	0.3733	0.2604	0.4131	0.1901	0.3603	0.28712	0.3056	0.4131	0.2775	0.28712	0.1647	0.3008	0.2383	0.3194	0.4131	0.3513	0.28712	0.2537	0.28712	0.2197	0.2869	0.1497	0.1977	0.2869	0.2869	0.2869	0.28712	0.1901	0.2131	0.5297	0.2791	0.1436	0.2197	0.28712	0.2383	0.3121	0.3194	0.2812	0.2489	0.5847	0.3603	0.3035	0.2511	0.1901	0.4964	0.1967	0.4842	0.2383	0.28712
EMC6_38483_AD	0.5453	0.3747	0.4299	0.547	0.7243	0.5329	0.3602	0.519	0.6917	0.3738	0.4914	0.6781	0.6365	0.6597	0.4609	0.4823	0.4338	0.7051	0.3842	1	0.8975	0.4473	0.4647	0.7243	0.6417	0.5271	0.6215	0.3729	0.4994	0.4668	0.8653	0.5208	0.5803	0.6583	0.5824	0.335	0.5835	0.482	0.4622	0.5629	0.5364	0.6523	0.6124	0.6668	0.754	0.8506	0.7625	0.6459	0.4537
CYB5D2_38523_AD	0.6047	0.722	0.5029	0.7149	0.8287	1	0.3903	0.6102	0.5046	0.592115	0.6633	0.592115	0.6943	0.7718	0.4094	0.3468	0.556	0.5484	0.53	0.8156	0.5988	0.5476	0.6234	0.6357	0.5976	0.8066	0.4231	0.3923	0.7902	0.8315	0.5457	0.5178	0.4835	1	0.753	0.6127	0.592115	0.8075	0.6191	0.689	0.6676	0.8355	0.7574	0.7055	0.592115	0.601	0.4754	0.5965	0.5318
CAMTA2_38637_AA	0.3346	0.557	0.6204	0.7237	0.6535	0.6178	0.567	0.8383	0.6535	0.708668	0.5858	0.9096	0.5858	0.6656	0.8297	0.5728	0.8034	0.6111	0.708668	0.6535	0.6875	0.4681	0.4853	0.7154	0.7586	0.6875	0.7586	0.6875	0.708668	0.891	0.557	0.7674	0.7702	0.8566	0.6769	0.7586	0.6111	0.7904	0.6263	0.8034	0.9144	0.7458	0.7646	0.5766	0.557	0.7674	0.8736	0.7009	0.7388
ZNF232_38655_AA	0.7372	0.5543	0.7695	0.7939	0.663	0.6451	0.5961	0.7145	0.898	0.7537	0.5485	0.5344	0.5893	0.6875	0.7754	0.808	0.8427	0.8052	0.8732	0.808	0.5693	0.8212	0.4335	0.5442	0.6862	0.7495	0.7721	0.7321	0.6475	0.728107	0.6451	0.8283	0.5504	0.808	0.5344	0.8032	0.7683	0.7368	0.8791	0.8196	0.6377	0.7441	0.6966	0.8148	0.8493	0.8938	0.6779	0.7337	0.9397
XAF1_38812_AA	0.7063	0.3951	0.8003	0.3976	0.6023	0.2885	0.7623	0.5599	0.4711	0.585071	0.5619	0.9227	0.3364	0.725	0.7309	0.5441	0.5166	0.8061	0.585071	0.6782	0.6159	0.5719	0.4161	0.5016	0.4972	0.384	0.585071	0.7875	0.585071	0.6704	0.8912	0.9089	0.3631	0.6767	0.6516	0.6565	0.7948	0.6159	0.2959	0.7159	0.5282	0.7501	0.6943	0.6693	1	0.6905	0.7253	0.4204	0.3354
GABARAP_38867_AD	0.5017	0.1883	0.4785	0.4379	0.5367	0.5815	0.3589	0.5489	0.3826	0.6706	0.4909	0.2238	0.3577	0.3898	0.5271	0.2745	0.4887	0.2363	0.4646	0.6412	0.6381	0.5738	0.431	0.7045	0.5892	0.3981	0.5163	0.2923	0.2244	0.5674	0.3431	0.2436	0.3797	0.6488	0.3896	0.4098	0.7019	0.2978	0.4997	0.3439	0.3144	0.5454	0.4083	0.3708	0.6365	0.5435	0.6726	0.5672	0.1618
ACAP1_38923_AD	0.6684	0.8914	1	0.9497	1	0.8017	0.9049	0.8065	1	0.8167	0.7549	0.8552	0.9275	0.9104	0.9336	0.9312	0.8615	0.8884	0.8584	0.9166	1	1	0.7585	0.7149	1	0.8475	0.6831	0.9438	0.7618	1	0.7923	0.9589	0.8815	0.7367	0.9002	0.8651	0.8848	0.8943	0.8505	0.8449	1	1	1	1	0.6852	1	0.8773	0.8062	0.7697
TMEM88_39057_AA	0.7769	0.8165	0.883	0.6666	0.6065	1	0.5824	0.5515	0.5508	0.5546	0.7299	0.5208	0.7169	0.6719	0.7099	0.8547	0.4595	0.5746	0.6456	0.4795	0.6779	0.8082	0.653	0.7792	0.5296	0.4746	0.4914	0.6427	0.6655	0.6719	0.6184	0.6772	0.6637	0.6482	0.7887	0.6516	0.7333	0.6602	0.6379	0.6141	0.6784	0.6337	0.7537	0.6297	0.7269	0.7136	0.6382	0.6184	0.755
TMEM107_39112_AA	0.1053	0.3598	0.5948	0.0776	0.249	0.423617	1	0.423617	1	0.0661	0.3095	1	0.423617	0.3118	1	0.1905	1	0.36	0.0893	0.2223	0.423617	1	0.1248	0.2489	0.3525	0.0785	0.0195	0.7939	0.1652	0.423617	1	0.3064	0.2964	0.423617	0.3209	0.4771	0.4742	1	1	1	1	0.5309	0.4122	0.0945	0.5033	0.6352	1	0.0881	0.423617
RANGRF_39166_AD	0.4401	0.4336	0.398	0.6641	0.5611	0.8683	0.4641	0.4291	0.2968	0.2678	0.5986	0.5302	0.4984	0.4395	0.5618	0.5473	0.5294	0.4916	0.5294	0.5991	0.6684	0.7962	0.5159	0.513	0.7058	0.5521	0.4963	0.5271	0.3897	0.437	0.3368	0.4578	0.4817	0.5003	0.6263	0.4073	0.6488	0.6185	0.6184	0.6197	0.6243	0.6409	0.7791	0.4865	0.467	0.7438	0.5332	0.6402	0.7403
ZNF18_39297_AA	0.8969	0.4532	0.8969	0.7355	0.6989	0.698614	0.6074	0.7946	0.5371	0.698614	0.6592	0.4462	0.6769	0.7558	0.8212	0.7437	0.4916	0.7586	0.698614	0.6769	0.7719	0.5919	0.7267	0.5919	0.7437	0.392	0.698614	0.6423	0.853	1	0.698614	0.7303	0.6592	0.8417	0.78	0.8376	0.5371	0.8073	0.525	0.698614	0.8713	0.9141	0.6171	0.6769	0.8286	1	0.3259	0.6074	0.698614
ZNF286A_39381_AD	0.5646	0.5762	0.5595	0.6111	0.6305	1	0.6241	0.7431	0.6871	0.660582	0.3792	0.7517	0.1315	0.7491	0.6033	0.8561	0.660582	0.619	0.660582	0.7531	0.660582	0.5399	0.660582	1	1	0.7307	1	0.5601	0.660582	0.660582	0.4032	0.660582	0.660582	1	0.660582	0.8176	0.6614	0.539	1	1	1	0.7262	0.660582	0.6596	0.4174	0.776	0.7175	0.6917	1
ZNF286A_39385_AA	0.5465	0.1569	0.526169	0.6744	0.6053	0.6282	0.8623	0.7832	0.4937	0.526169	0.4054	0.526169	0.2973	0.526169	0.8959	0.4557	0.3996	0.7143	0.526169	0.7638	0.4095	0.526169	0.6377	0.526169	0.8294	0.7986	0.526169	0.4876	0.4569	0.3463	0.2091	0.5127	0.4827	0.5656	0.7788	0.5288	0.348	0.526169	0.4956	0.526169	0.7555	0.6026	0.6876	0.5644	0.526169	0.5345	0.8408	0.6602	0.2355
CENPV_39431_AA	0.5822	0.43	0.688	0.5955	0.5167	0.4233	0.5681	0.6169	0.6867	0.8567	0.3619	0.4672	0.4079	0.625	0.8655	0.6147	0.5348	0.3267	0.5229	0.7592	0.9417	0.6302	0.6703	0.6955	0.5811	0.3714	0.2744	0.3756	0.3742	0.7875	0.8919	0.6828	0.51	0.8673	0.5292	0.6034	0.8382	0.6975	0.4215	0.747	0.5593	0.7359	0.7696	0.5785	0.8555	0.7595	0.688	0.562	0.5096
UBB_39435_AD	0.3532	0.26787	0.1897	0.1998	0.3485	0.111	0.26787	0.6319	0.26787	0.26787	0.6187	0.135	0.254	0.2629	0.2575	0.1072	0.3843	0.26787	0.2843	0.304	0.3122	0.2378	0.26787	0	0.3188	0.26787	0.0897	0.0819	0.3843	0.3532	0.26787	0	0.4382	0.2236	0.1577	0.211	0.254	0.3466	0.2629	0.2629	0.26787	0.3421	0.3669	0.4109	0.5841	0.4542	0.168	0.1019	0.2236
TRPV2_39436_AA	0.692386	0.692386	0.692386	0.5856	0.7437	0.6929	0.8627	0.5417	0.692386	0.6592	0.6592	0.7524	0.6128	0.7206	1	0.5371	0.7074	0.3607	0.78	0.6394	0.6111	0.5417	0.7267	0.598	0.6351	0.9508	0.5919	0.5371	0.7437	0.6929	0.7437	0.7437	0.6592	0.7524	0.6171	0.5417	0.7632	0.7206	0.6989	0.8713	0.6351	0.7343	0.8457	0.5301	0.4916	0.6898	0.7206	0.6592	0.692386
B9D1_39713_AA	0.614931	0.6608	0.3508	0.576	0.4994	0.614931	0.6999	0.5461	0.614931	0.7845	0.7669	0.5196	0.3559	0.614931	0.5096	0.4021	0.614931	0.7706	0.7036	0.614931	0.614931	0.614931	0.3225	0.4589	0.614931	0.4562	0.1349	0.4208	0.7559	0.614931	0.6993	0.4907	0.5608	0.8631	0.3351	0.3781	0.5371	0.614931	0.6767	0.3049	0.4333	0.3159	0.614931	0.5418	0.2755	0.614931	0.6494	0.614931	0.6305
MAPK7_39723_AD	0.9	1	0.6774	0.8462	0.8889	0.4894	0.5882	0.6667	0.7647	0.762517	0.8235	0.7143	1	0.8889	0.7447	0.8298	0.7647	0.9259	0.762517	0.762517	0.5714	0.5789	0.8571	0.7037	0.7	0.762517	0.762517	0.8571	0.762517	0.762517	0.6364	0.8636	0.75	0.5714	0.7778	0.75	0.381	0.6129	0.7619	0.762517	0.76	0.8333	0.7857	0.9	0.762517	0.7143	0.7576	0.5738	0.8039
RAB34_39963_AA	0.8002	0.7074	0.6749	0.6447	0.5151	0.7427	0.5632	0.8155	0.3281	0.5586	0.712	0.5608	0.5299	0.3984	0.7221	0.7781	0.5691	0.625	0.6646	0.2313	0.3655	0.723	0.688	0.5338	0.5153	0.4844	0.5718	0.786	0.6997	0.6077	0.2979	0.6762	0.6551	0.3355	0.5902	0.7205	0.5731	0.716	0.6977	0.4605	0.6959	0.4541	0.5776	0.411	0.6674	0.4818	0.5486	0.6651	0.7146
MYO19_40482_AA	0.3205	0.4044	0.4509	0.3276	0.3997	0.3126	0.342	0.3831	0.2854	0.3238	0.3494	0.3446	0.5148	0.4591	0.4544	0.3539	0.5435	0.3705	0.8668	0.3269	0.4306	0.4014	0.389	0.3155	0.3868	0.3732	0.3379	0.4287	0.3828	0.4281	0.3253	0.3992	0.3312	0.4102	0.3447	0.415	0.4049	0.386	0.4114	0.5126	0.3553	0.4629	0.4601	0.363	0.4539	0.363	0.5072	0.3697	0.3775
TBC1D3F_40558_AA	0.570752	0.4123	0.4879	0.6558	0.5289	0.6082	0.6401	0.5169	0.4399	0.3841	0.7157	0.4419	0.4879	0.8496	0.7332	0.5425	0.7794	0.7651	0.4269	0.6063	0.4269	0.8802	1	0.6039	0.448	0.5138	0.634	0.8078	0.5768	0.5363	0.6092	0.6677	0.3235	0.7651	0.602	0.9538	0.617	0.6082	0.5205	0.4659	0.3941	0.6651	0.6858	0.7324	0.6644	0.5876	0.6413	0.7743	0.8563
CWC25_40597_AD	0.2283	0.1686	0.2969	0.1558	0.1003	0.1026	0.2276	0.205	0.157	0.2739	0.1947	0.254	0.2458	0.4034	0.1899	0.188	0.1299	0.2666	0.3411	0.2202	0.1843	0.223	0.2821	0.1539	0.2789	0.2752	0.1845	0.4158	0.2101	0.3949	0.3514	0.4046	0.3739	0.1825	0.3076	0.4214	0.3533	0.2318	0.1167	0.4454	0.2344	0.502	0.5141	0.2063	0.7021	0.4765	0.4181	0.1928	0.1398
RPL23_40607_AA	1	0.924942	0.924942	1	0.4515	1	1	1	0.924942	0.924942	1	1	1	1	1	0.6309	1	1	1	1	1	1	1	1	1	0.924942	0.6189	1	1	1	1	1	1	0.6437	1	0.3334	1	1	1	0.6947	1	1	1	0.6044	1	1	1	0.924942	1
CDK12_40649_AA	0.6377	0.5636	0.8488	0.4889	0.4335	0.7132	0.4461	0.5636	0.7209	0.544635	0.5954	0.3894	0.6326	0.775	0.7372	0.6433	0.8427	0.6048	0.544635	0.4335	0.8427	0.4934	0.8516	0.3515	0.558	0.393	0.4665	0.5478	0.6966	0.3894	0.5223	0.3429	0.6048	0.4064	0.587	0.546	0.5605	0.675	0.5794	0.505	0.3378	0.4505	0.5106	0.4816	0.544635	0.6238	0.6297	0.5202	0.4717
MED24_40835_AA	0.4186	0.4776	0.5872	0.5116	0.4815	0.5614	0.5242	0.6585	0.7152	0.4853	0.6078	0.5763	0.7181	0.4911	0.4937	0.4774	0.5426	0.448	0.559503	0.5416	0.492	0.4822	0.4898	0.6339	0.6193	0.7059	0.7586	0.5021	0.559503	0.7278	0.6154	0.6043	0.7249	0.4371	0.4161	0.5706	0.4989	0.5217	0.5432	0.5614	0.5872	0.4815	0.452	0.6204	0.559503	0.4142	0.615	0.6324	0.638
NT5C3B_40959_AD	0.6134	0.7521	0.7045	0.6078	0.6523	0.6719	0.6415	0.6869	0.5009	0.5181	0.7011	0.7992	0.5319	0.5417	0.5457	0.7327	0.4254	0.595	0.7596	0.356	0.4716	0.5878	0.5802	0.5866	0.8113	0.5757	0.5181	0.7872	0.8393	0.6678	0.4519	0.6868	0.5849	0.4996	0.6365	0.7713	0.7525	0.5901	0.6032	0.5307	0.7108	0.6886	0.7924	0.524	0.6575	0.5849	0.6825	0.6687	0.7749
PSMC3IP_41080_AD	0.1458	0.3538	0.0675	0.0383	0.0447	0	0.2584	0.1458	0.146891	0.0577	0.6418	0.0504	0.1458	0.0905	0.166	0.2334	0.0905	0.2334	0.1172	0.1578	0.0383	0.0259	0.4175	0.0905	0.1409	0.146891	0.0538	0.1854	0.2098	0.166	0.1021	0.1533	0.146891	0.0797	0	0.2444	0.2098	0.146891	0.0786	0.2038	0.0277	0.1567	0.098	0.0515	0.0538	0.2848	0.5641	0.1552	0.1172
BRCA1_41197_AD	1	0.9319	1	1	0.8825	0.8796	0.8609	0.9027	1	1	1	0.5593	1	1	1	0.9029	1	0.911	1	0.6851	1	0.8149	1	1	0.8322	1	1	1	1	1	1	1	1	0.7411	0.6951	0.8141	1	1	0.8822	1	1	0.8527	1	0.8158	1	1	1	0.9321	0.9034
ASB16_41780_AD	1	0.9535	0.8817	0.8279	0.7417	0.9072	1	0.8182	1	1	0.9437	0.925	0.7884	0.85	0.7596	0.9389	1	0.7468	0.8582	0.6923	0.9129	0.8195	1	0.8397	0.7097	0.8582	1	0.8391	0.9624	1	0.7609	0.8002	0.8848	0.7951	1	0.866	0.8279	1	0.7797	0.7417	0.6669	0.8783	0.7857	1	0.8207	1	0.8848	0.8102	0.8366
TMUB2_41793_AA	0.8126	0.3606	0.4885	0.4449	0.426	0.4557	0.3035	0.4531	0.5467	0.722	0.5313	0.6767	0.5395	0.44	0.5175	0.5049	0.1102	0.4394	0.456941	0.3992	0.3658	0.4501	0.5854	0.2849	0.4036	0.504	0.3485	0.352	0.4879	0.456941	0.3475	0.3042	0.4555	0.5662	0.4154	0.4152	0.2778	0.5082	0.4023	0.5174	0.4828	0.3971	0.4304	0.5714	0.1232	0.4237	0.6182	0.419	0.4894
TMUB2_41803_AA	0.7188	0.5663	0.5881	0.4653	0.6231	0.7506	0.6218	0.5591	0.554	0.4338	0.5113	0.6966	0.539	0.4516	0.4342	0.6573	0.5327	0.4746	0.7284	0.5341	0.6441	0.7339	0.5327	0.5502	0.7366	0.5367	0.627	0.5579	0.4699	0.7012	0.7444	0.6083	0.6025	0.7383	0.5526	0.6596	0.6244	0.4504	0.5195	0.6903	0.6304	0.4853	0.6333	0.6223	0.6355	0.6816	0.7664	0.7529	0.6256
TMUB2_41806_AA	0.4714	0.2323	0.3262	0.4352	0.3475	0.3296	0.5412	0.4768	0.4927	0.5679	0.5528	0.5104	0.5234	0.6143	0.469	0.599	0.4976	0.3041	0.478239	0.6036	0.3814	0.6167	0.2193	0.3974	0.4777	0.4927	0.666	0.5085	0.4428	0.3489	0.3901	0.4634	0.2091	0.4614	0.6131	0.3535	0.5444	0.5717	0.4687	0.5052	0.5664	0.4315	0.4946	0.5564	0.7305	0.4121	0.2931	0.5147	0.5098
TMUB2_41811_AD	0.6417	0.7625	0.4947	0.5347	0.5893	0.5537	0.5225	0.6279	0.8741	0.7282	0.7831	0.4324	0.771	0.8194	0.6828	0.4477	0.4188	0.7481	0.4058	0.5744	0.5004	0.7497	0.7348	0.6037	0.5585	0.6876	0.4741	0.5505	0.5294	0.4071	0.7177	0.6355	0.6658	0.539	0.6248	0.7218	0.5434	0.464	0.4039	0.7497	0.2936	0.7662	0.6726	0.6006	0.7738	0.863	0.6922	0.4801	0.5478
TMUB2_41815_AD	0.4858	0.7571	0.5718	0.5877	0.6516	0.8841	0.5916	0.715	0.8795	0.9138	0.6836	0.7487	0.7321	0.6765	0.8836	0.6422	0.745	0.8742	0.5204	0.817	0.7057	0.7536	0.7078	0.6762	0.7834	0.6208	0.4753	0.6853	0.5906	0.799	0.7148	0.7162	0.9092	0.8494	0.562	0.6272	0.7249	0.6313	0.7099	0.8027	0.7184	0.8064	0.804	0.7616	0.7263	0.8999	0.8544	0.8299	0.7368
TMUB2_41816_AD	0.3763	0.5199	0.6036	0.591	0.606	0.8948	0.5785	0.6445	0.669751	0.669751	0.4206	0.819	0.5137	0.3873	0.8259	0.713	0.8341	0.7338	0.6959	0.8064	0.7412	0.565	0.4965	0.6055	0.7941	0.5116	0.5787	0.6675	0.5955	0.8984	0.5296	0.642	0.8576	0.8585	0.477	0.4331	0.7274	0.6974	0.8157	0.6161	0.8756	0.6344	0.7121	0.7338	0.531	0.6609	0.7584	0.8635	0.7259
TMUB2_41817_AA	0	0.0788	0.1485	0.048	0.1134	0.1426	0.3099	0.0756	0	0	0.1072	0	0	0	0.1735	0.0521	0.1502	0.0779	0.133733	0	0	0	0.1576	0	0.0969	0.1269	0.133733	0.0955	0.2821	0	0.133733	0.1771	0.133733	0.133733	0.1414	0.1771	0.0916	0	0.2145	0.1554	0	0.1271	0.1682	0.2361	0.133733	0.3177	0.0742	0.1029	0.1635
DBF4B_41887_AA	0.7286	0.649502	0.4047	0.6893	0.4722	0.649502	0.6832	0.6331	0.742	0.649502	0.7137	0.7097	0.7097	0.3651	0.7151	0.6572	0.4183	0.3274	0.5133	0.6617	0.6331	0.742	0.8215	0.6572	0.5951	0.5993	0.649502	0.6861	0.649502	0.649502	0.4632	0.5112	0.7598	0.8215	0.649502	0.7824	0.4461	0.6053	0.9162	0.5773	0.4632	0.5244	0.5222	0.5828	0.561	0.568	0.6331	0.5898	0.649502
CCDC103_41906_AD	0.6109	0.8703	0.8818	0.7441	0.8995	0.8173	0.7131	0.5986	0.5382	0.739477	0.6911	0.8392	0.8173	0.7131	0.9598	0.7565	0.8325	0.57	0.8913	0.6654	0.6911	0.8173	0.8995	0.4272	0.7172	1	0.6911	0.727	0.6762	0.739477	0.739477	0.6237	0.6351	0.8483	0.804	0.7322	0.528	0.7131	0.7489	0.9179	0.7131	0.5611	0.7637	0.5986	0.5986	0.7885	0.7489	0.7991	0.8173
FAM187A_41908_AD	0.6037	0.7669	0.806904	0.8354	0.949	0.8231	0.8354	0.792	0.8163	0.806904	0.7303	0.8088	0.8354	0.7643	0.8088	0.8494	0.9222	0.5919	0.806904	0.8231	0.9312	0.8988	0.8639	0.5301	1	0.8639	0.806904	0.8664	0.8024	0.806904	0.806904	0.935	0.9384	0.8231	0.7383	0.7383	0.8713	0.9384	0.7406	0.9167	0.8713	0.8088	0.7719	0.7719	0.806904	0.806904	0.8556	0.8088	0.8274
HEXIM2_41951_AD	0.7511	0.8055	0.7196	0.9295	0.9131	0.5329	0.543	0.7436	0.8932	0.7196	0.7545	0.6289	0.5512	0.7492	0.4254	0.8289	0.8873	0.7325	0.8847	0.8213	0.7228	0.8378	0.6505	0.8587	1	0.3946	0.7659	0.8135	0.707	0.6377	0.7393	0.3619	0.7819	0.801	0.8445	0.831	0.7196	0.7505	0.754	0.7631	0.5836	0.716	0.599	0.8182	0.837	0.7206	0.816	0.7196	0.8767
OSBPL7_42096_AA	0	0.171582	0.2174	0.119	0.1171	0.1395	0.0541	0.1956	0	0.171582	0.075	0.2448	0.1956	0.2744	0.1331	0.345	0.122	0.1134	0.171582	0.2303	0.2258	0.2174	0.1171	0.3018	0.1395	0.2448	0.0573	0.1542	0.1084	0.171582	0.1134	0.2628	0.3271	0.2303	0.1833	0.2174	0.1724	0.0443	0.0812	0.2744	0.2363	0.2964	0.4079	0.3083	0.1956	0.2941	0.28	0.1395	0.2059
SPATA20_42428_AD	0.2977	0.0088	0.0524	0	0.0235	0.0155	0.0035	0.0223	0.0072	0.005	0.0147	0	0.0294	0.0178	0.011	0.0091	0.3688	0.0236	0	0.3984	0.2711	0.0183	0	0.0125	0.0098	0	0	0.0236	0.3599	0.0081	0.4396	0.4949	0.0111	0.0326	0.0062	0.0305	0.4721	0.0068	0.004	0.0305	0.0297	0.0189	0.0172	0.0083	0.0141	0.5473	0.0223	0.0091	0.0081
RNF43_42674_AD	1	1	1	0.7928	0.7348	0.6381	0.6998	0.9323	0.8346	1	0.7192	1	0.7734	1	0.9554	0.8664	1	0.8386	0.921718	0.9074	0.85	0.488	1	0.8664	1	1	1	1	0.921718	1	1	0.7228	1	0.8733	1	0.7035	0.8414	1	0.8468	0.921718	0.7623	1	1	0.8346	0.921718	0.7205	0.8593	0.8835	1
RAD51C_42718_AD	1	1	0.846783	0.9019	0.846783	0.846783	0.7705	0.6967	0.846783	0.846783	0.846783	1	1	0.7121	1	0.7608	0.846783	0.8983	0.846783	1	0.846783	1	1	1	0.7954	0.7387	0.7795	0.8212	1	0.846783	0.846783	0.8319	0.7795	0.8497	1	0.8319	1	1	1	1	0.846783	1	1	0.5857	0.9111	0.7795	0.6795	1	0.3932
INTS2_42894_AD	1	0.9111	1	0.7146	1	0.4171	1	0.8564	0.7695	0.866485	1	0.866485	1	0.8336	0.7695	0.8564	1	1	0.866485	1	1	0.4549	0.866485	0.5176	0.5439	0.866485	1	1	0.866485	0.866485	1	1	0.6561	1	0.866485	1	1	1	1	0.866485	0.724	1	1	1	0.866485	1	1	0.9148	1
STRADA_42981_AD	0.8308	0.7804	0.661751	0.6983	0.7774	0.3568	0.8849	0.7654	0.9103	0.661751	0.3918	0.6018	0.5333	0.541	0.5979	0.8145	0.7186	0.7897	0.661751	0.4362	0.5879	0.567	0.6098	0.55	0.6404	0.661751	0.661751	0.9202	0.661751	0.44	0.7534	0.71	0.8884	0.362	0.661751	0.616	0.8188	0.5053	0.5686	0.4598	0.4123	0.3708	0.5288	0.5867	0.661751	0.4853	0.661751	0.661751	0.3323
ITGB4_43491_AD	0.2782	0.427067	0.427067	0.3818	0.5623	0.4512	0.5241	0.4585	0.1764	0.427067	0.427067	0.2998	0.427067	0.3911	0.427067	0.3088	0.2998	0.2998	0.427067	0.1941	0.357	0.3551	0.5819	0.4613	0.4304	0.427067	0.6162	0.3911	0.427067	0.5998	0.3911	0.6314	0.3598	0.4669	0.4315	0.3617	0.3729	0.4551	0.336	0.5743	0.3145	0.5268	0.3911	0.8181	0.427067	0.3564	0.5181	0.4709	0.497
FBF1_43532_AA	0.6803	0.3479	0.4362	0.4781	0.401	0.6171	0.481	0.4653	0.4293	0.3672	0.3982	0.4622	0.518	0.4085	0.5014	0.3974	0.5752	0.4716	0.478422	0.4161	0.5371	0.4293	0.478422	0.4129	0.4251	0.1947	0.4462	0.4554	0.4362	0.7206	0.7303	0.4462	0.456	0.4417	0.5801	0.3989	0.518	0.518	0.5517	0.3495	0.4266	0.4242	0.5632	0.4653	0.5371	0.5781	0.5134	0.6007	0.4462
EXOC7_43567_AA	0.1757	0.2724	0.6339	0.2279	0.6224	0.6972	0.3698	0.5257	0.266	0.3566	0.5057	0.5889	0.4645	0.5933	0.3385	0.4026	0.4501	0.4959	0.1134	0.4581	0.3049	0.3	0.1103	0.4724	0.4303	0.3385	0.2712	0.6718	0.3385	0.6208	0.6718	0.4363	0.3102	0.6655	0.5723	0.6946	0.7969	0.3661	0.2653	0.5997	0.5918	0.6329	0.5814	0.5362	0.8502	0.7688	0.6607	0.4423	0.6647
SPHK1_43585_AD	0.234	0.4258	0.6886	0.4058	0.3366	0.3279	0.4766	0.2486	0.266	0.4384	0.1202	0.2807	0.2693	0.18	0.2225	0.2615	0.1633	0.5251	0.2807	0.4058	0.18	0.506	0.1615	0.2404	0.2714	0.2807	0.242	0.3397	0.219	0.3366	0.1782	0.3051	0.3988	0.2392	0.3473	0.4938	0.3525	0.3189	0.1294	0.2635	0.239	0.5886	0.3917	0.3302	0.4938	0.6414	0.5009	0.2298	0.1974
METTL23_43631_AD	0.5413	0.3948	0.3567	0.3887	0.1709	0	0.338	0.354	0.3265	0.089	0.0946	0.4511	0.3397	0.344	0.1763	0.4369	0.3777	0.3413	0.275	0.2132	0.4133	0.4867	0.2649	0.3114	0.2965	0.2678	0	0.3393	0.329	0.3626	0.2821	0.3832	0.1876	0.1704	0.3068	0.2816	0	0	0.2558	0	0.2424	0.3131	0.3743	0.4119	0.2895	0.3522	0.5323	0.3024	0.28948
METTL23_43637_AD	0.3128	0.3575	0.3712	0.5411	0.2723	0.4024	0.3142	0.3217	0.4812	0.5581	0.4989	0.5795	0.4514	0.355	0.3587	0.4332	0.3499	0.4238	0.7046	0.4705	0.7005	0.4588	0.4708	0.4448	0.5493	0.3932	0.5855	0.5089	0.4526	0.5718	0.4721	0.4813	0.3836	0.4412	0.3661	0.3676	0.4654	0.4036	0.5346	0.4473	0.411	0.4076	0.4373	0.4793	0.3941	0.439	0.5535	0.4629	0.5425
METTL23_43640_AD	0.3197	0.4285	0.315	0.4069	0.1293	0.250974	0.2556	0.3621	0.2288	0.0782	0.0932	0.2381	0.3239	0.3563	0.2139	0.4486	0.4269	0.2972	0.2858	0.2012	0.4907	0.3807	0.3341	0.2336	0.2198	0.3055	0	0.3741	0.2003	0.4339	0.2696	0.3465	0.2175	0.1104	0.3604	0.2716	0	0	0.267	0	0.1672	0.276	0.4326	0.2689	0.4406	0.2509	0.3925	0.2381	0
METTL23_43648_AD	0.4469	0.4794	0.5395	0.577	0.3068	0.499621	0.3974	0.8086	0.5108	0.1435	0.2218	0.3284	0.5306	0.6861	0.342	0.7011	0.5718	0.5666	0.3627	0.4352	0.6044	0.7242	0.5039	0.7171	0.4985	0.4228	0.499621	0.76	0.6105	0.525	0.3094	0.5622	0.5102	0.2305	0.514	0.3828	0.499621	0	0.4135	0.499621	0.5531	0.5215	0.7394	0.6759	0.7883	0.494	0.5886	0.5233	0.499621
METTL23_43650_AD	0.553	0.714	0.687	0.7358	0.7635	1	0.771	0.9367	0.7084	0.6509	0.76	0.5464	0.7683	0.8589	0.7763	0.8692	0.7042	0.8108	0.5906	0.8052	0.8481	0.8041	0.7571	0.8781	0.7699	0.7618	0.7131	0.9081	0.8317	0.7294	0.6854	0.7998	0.88	0.6072	0.7492	0.7434	0.7065	0.8064	0.7593	0.7727	0.8233	0.8167	0.8637	0.7701	0.9124	0.7537	0.6754	0.7394	0.9002
METTL23_43652_AD	0.6707	0.5925	0.7177	0.6641	0.737	1	0.7002	0.9003	0.7978	0.6365	0.7347	0.6764	0.7151	0.7781	0.6826	0.7922	0.6994	0.7801	0.5663	0.7174	0.6761	0.7972	0.6619	0.8908	0.8021	0.6248	0.745	0.8791	0.8663	0.6557	0.563	0.753	0.7883	0.6985	0.6584	0.7303	0.6718	0.7231	0.7214	0.695	0.858	0.7457	0.7948	0.836	0.8366	0.7591	0.7081	0.7646	0.9549
METTL23_43654_AD	0.4596	0.6944	0.5109	0.5363	0.2743	0.5389	0.4061	0.3003	0.5313	0.3998	0.5417	0.5661	0.4787	0.4915	0.2757	0.5542	0.4878	0.3263	0.4742	0.3948	0.5154	0.5519	0.6031	0.5141	0.5062	0.457	0.7565	0.5619	0.5726	0.5291	0.4119	0.6843	0.4718	0.5779	0.4789	0.4612	0.4962	0.5601	0.4203	0.419	0.4512	0.4371	0.6463	0.537	0.6587	0.5763	0.6165	0.5272	0.6277
METTL23_43656_AD	0.6582	0.8118	0.6664	0.5064	0.5052	0.632	0.5909	0.4797	0.5868	0.349	0.5587	0.511	0.5367	0.6187	0.4188	0.6233	0.7076	0.4091	0.2956	0.4122	0.3081	0.5884	0.6523	0.5818	0.4831	0.5587	0.6834	0.5899	0.6234	0.4956	0.4398	0.7062	0.5865	0.653	0.6241	0.6334	0.5467	0.6643	0.4295	0.4653	0.5613	0.5225	0.7186	0.5718	0.767	0.6399	0.5716	0.5706	0.6011
MFSD11_43685_AD	0.9431	0.9448	1	0.858	1	0.7834	0.9449	0.9148	0.9137	1	0.9337	0.864	1	0.8781	0.8756	0.8836	1	0.7588	0.7212	1	1	0.918375	1	0.9036	1	1	1	0.9341	1	1	1	0.8374	1	1	0.8191	1	0.8521	0.918375	1	0.918375	0.918375	1	0.8053	1	0.918375	1	0.8928	1	0.6598
MFSD11_43687_AD	0.8613	0.9296	0.7348	0.8253	0.2896	0.7454	0.8704	0.7434	0.888	0.6439	0.7882	0.6132	1	0.7365	0.6094	0.752	1	0.8297	0.6595	0.8486	0.6548	0.6379	0.614	0.5841	0.8849	0.7625	1	0.9274	0.6507	0.7642	0.7405	1	0.7294	0.7018	0.6289	0.9029	0.8118	1	0.9262	0.6298	0.1869	0.4223	0.6501	0.7587	0.719802	0.595	0.8674	0.7904	0.494
MFSD11_43690_AD	0.3609	0.6873	1	0.3937	0.2325	1	0.5747	0.7379	0.3869	0.5352	0.4582	1	0.811	0.3891	0.3689	0.6173	0.5318	0.249	0.2357	0.5995	0.5046	0.3715	0.1567	0.309	0.6512	0.2933	0.4652	0.4003	0.2532	0.6498	0.3916	0.6738	1	0.7132	0.2646	0.4727	0.5786	0.671	0.7351	0.4658	0.156	0.6556	1	0.4165	0.0277	0.6484	0.4759	1	0.491
MFSD11_43691_AD	0.6515	0.7187	1	0.6607	0.621242	1	0.6175	0.8357	0.7665	0.621242	0.3378	1	0.7675	0.517	0.3984	0.7013	0.7217	0.6302	0.6496	0.4273	0.4658	0.6812	0.0634	0.6791	0.663	0.4601	0.4095	0.1239	0.3925	0.6753	0.4198	0.8389	0.621242	0.749	0.7181	0	0.922	0.621242	0.621242	0.7296	0.4074	0.621242	1	0.5171	0.2726	0.8313	0.6557	1	0.6655
MFSD11_43692_AD	0.4457	0.7333	1	0.4102	0.8256	1	0.4991	0.8216	0.4189	0.8095	0.5526	1	0.8718	0.5356	0.6628	0.6902	0.692522	0.3562	0.3939	0.6226	0.7091	0.8157	0.4731	0.697	0.8077	0.2099	0.692522	0.1049	0.4118	0.75	0.5122	0.692522	1	0.7674	0.7309	0.253	0.8618	0.692522	0.3427	0.7458	0.6711	0.9272	1	0.3639	0.3966	0.8413	0.4078	1	0.7959
TMC6_43759_AD	0.0828	0.237558	0.4105	0.1832	0.1806	0.1033	0.2559	0.1575	0.3063	0.1689	0.481	0.1962	0.188	0.292	0.5602	0.1747	0.2511	0.6043	0.1484	0.3261	0.1905	0.3822	0.2296	0.1644	0.2246	0.1719	0.0846	0.237558	0.0896	0.1476	0.1694	0.3539	0.3227	0.1592	0.1653	0.4954	0.191	0.2193	0.272	0.2349	0.1396	0.5406	0.3867	0.2464	0.3765	0.3884	0.4466	0.1427	0.0874
SYNGR2_43775_AA	0.0639	0.1148	0.1325	0.1304	0.1303	0.0697	0.09	0.2021	0.1769	0.0322	0.1008	0.2279	0.0864	0.1318	0.1299	0.087	0.0915	0.1046	0.2655	0.2389	0.1217	0.2968	0.0802	0.2088	0.137	0.0528	0.1451	0.3239	0.0707	0.2419	0.1175	0.1755	0.145	0.1994	0.0928	0.1219	0.2838	0.0656	0.0776	0.2602	0.1888	0.1946	0.1417	0.2851	0.4659	0.3219	0.3496	0.087	0.1441
AFMID_43791_AD	0.28246	0.28246	0.1459	0.189	0.1566	0.3389	0.2217	0.2125	0.4992	0.2217	0.1962	0.3345	0.1088	0.2993	0.2426	0.2426	0.28246	0.2317	0.28246	0.0867	0.2426	0.3389	0.176	0.2506	0.3179	0.2426	0.2125	0.3345	0.4607	0.5164	0.3832	0.1596	0.1962	0.4607	0.3219	0.3281	0.4607	0.313	0.2217	0.176	0.3481	0.2901	0.2473	0.2394	0.3629	0.4227	0.2993	0.0374	0.2473
ENDOV_44069_AD	0.7294	0.7985	1	1	1	0.6818	0.9302	0.9104	0.9117	1	0.8452	1	1	0.8985	0.9611	0.7263	0.880728	0.9037	1	1	1	1	0.8778	0.7366	1	0.880728	0.341	1	0.6951	0.880728	0.6166	1	0.6197	1	0.6985	0.893	0.8809	0.9174	0.5894	0.9019	0.958	1	1	1	1	1	0.709	0.6903	0.9022
AZI1_44108_AD	0.2182	0.2106	0.272	0.3431	0.5412	0.6086	0.3684	0.2322	0.3351	0.5921	0.3282	0.5314	0.4757	0.5595	0.2951	0.427	0.3121	0.3194	0.4137	0.3379	0.3822	0.418	0.3414	0.1313	0.2322	0.5474	0.292	0.4508	0.5314	0.28	0.2139	0.2322	0.3261	0.2663	0.2505	0.3414	0.2743	0.4757	0.2693	0.2538	0.348	0.331	0.4402	0.3567	0.3461	0.2841	0.5142	0.2743	0.4374
ENTHD2_44112_AD	0.4142	0.3381	0.5937	0.5354	0.2865	0.567	0.3361	0.4481	0.2205	0.386	0.3725	0.4768	0.3122	0.3933	0.357	0.4811	0.2683	0.3976	0.3656	0.1942	0.3346	0.5535	0.1696	0.3656	0.3204	0.2276	0.1259	0.8423	0.2259	0.7491	0.4142	0.4668	0.5297	0.3284	0.4668	0.7329	0.6462	0.435	0.3785	0.5053	0.3708	0.6714	0.7089	0.4068	0.5682	0.6689	0.6404	0.2391	0.3032
OXLD1_44142_AD	0.6988	0.9655	1	0.6817	0.816836	0.816836	0.8639	0.862	0.816836	0.8038	0.7039	0.6755	0.8459	0.9236	0.9232	0.816836	0.9078	0.8922	0.9643	0.816836	1	0.816836	0.8164	0.816836	0.914	0.816836	0.7884	0.7303	0.8859	0.816836	0.8895	0.8073	0.8198	0.9041	0.6841	0.7343	0.6648	0.7202	0.816836	0.8753	0.816836	0.813	0.816836	0.9502	0.8748	0.8535	0.7953	0.8852	0.8842
OXLD1_44143_AD	0.5787	0.5648	0.3718	0.6773	0.6651	0.6772	0.5935	0.5776	0.7207	0.512	0.6201	0.4986	0.6344	0.6857	0.5339	0.6764	0.5279	0.6438	0.5576	0.8496	0.4506	0.6201	0.6233	0.6833	0.5239	0.5765	0.3783	0.6651	0.5396	0.5245	0.6452	0.5777	0.6638	0.6716	0.4886	0.7908	0.6249	0.6986	0.6978	0.4225	0.5737	0.6771	0.7468	0.4899	0.4448	0.7602	0.5854	0.5805	0.3359
OXLD1_44144_AD	0.3165	0.496	0.3744	0.2979	0	0	0.4575	0.2569	0	0.3442	0.3977	0.1674	0.3038	0.3053	0.4085	0	0.5306	0.4765	0.4579	0.306753	0.6239	0	0.173	0	0.4003	0	0.1437	0.376	0.4156	0	0.4407	0.4945	0.444	0.5052	0.1945	0.4091	0.1577	0.2809	0	0.4252	0	0.2312	0	0.5738	0.2846	0.5918	0.3472	0.2591	0.5056
FAM195B_44174_AA	0.3568	0.376588	0.376588	0.1443	0.376588	0.376588	0.4294	0.3453	0.376588	0.376588	0.3982	0.3777	0.5672	0.2264	0.2986	0.2774	0.3846	0.2203	0.4559	0.2243	0.1341	0.416	0.1256	0.3049	0.182	0.5423	0.4924	0.3777	0.204	0.3487	0.376588	0.172	0.4421	0.376588	0.2199	0.5086	0.6988	0.3556	0.2829	0.504	0.3054	0.6097	0.4753	0.5924	0.9167	0.3285	0.4572	0.376588	0.376588
GPS1_44279_AA	0.586256	0.5291	0.8457	0.613	0.7334	0.5577	0.529	0.758	0	0.803	0.3516	0.5364	0.7546	0.4309	0.5734	0.61	0.785	0.3953	0.5737	0.6906	0.6504	0.6387	0.4963	0.7459	0.6723	0.586256	0.396	0.705	0.586256	0.586256	0.7355	0.743	0.586256	0.5464	0.6557	0.6225	0.4786	0	0.4867	0.4249	0.6691	0.791	0.7758	0.6473	0.586256	0.4881	0.813	0.8103	0.8147
ENOSF1_44470_AA	0.906291	1	1	0.9482	0.9368	1	1	0.9794	1	1	0.9159	0.906291	1	1	1	0.4004	1	1	0.906291	0.9074	0.8745	1	0.906291	1	1	0.8206	1	0.9809	1	1	0.952	0.908	1	0.9619	1	1	0.9687	0.8673	0.739	1	1	1	0.9499	0.8989	0.987	0.9525	1	0.9127	0.5665
ENOSF1_44476_AD	0.4511	0.3268	0.2631	0.3552	0.3702	0.310667	0.3663	0.0938	0.2083	0.0866	0.345	0.0404	0.6217	0.5496	0.4124	0.1752	0.7857	0.2599	0.4605	0.275	0.208	0.1933	0.4739	0.253	0.3799	0.2829	0.392	0.3865	0.4218	0.1245	0.1245	0.149	0.2328	0.1741	0.2927	0.3128	0.4236	0.473	0.5323	0.4783	0.4463	0.3216	0.2687	0.323	0.1726	0.3626	0.3746	0.4089	0.3741
TGIF1_44507_AD	0.2753	0.319	0.7748	0.4546	0.7358	0.698	0.3362	0.6393	0.3525	0.591846	0.5724	0.5394	0.4398	0.5821	0.4699	0.4092	0.3658	0.6128	0.5587	0.4997	0.4385	0.7346	0.4769	0.5668	0.7298	0.2862	0.6393	0.9294	0.6828	0.5134	0.5821	0.4529	0.3796	0.498	0.5428	0.6346	0.761	0.8137	0.2719	0.4647	0.7323	1	0.8201	0.7298	0.767	0.8374	0.786	0.6538	0.628
TGIF1_44508_AD	1	0.8233	0.9116	0.909	0.7347	0.9025	0.8471	0.78	0.5751	0.859527	0.6996	0.8256	0.796	1	1	0.6623	1	0.9042	1	0.8997	0.538	0.8652	0.6938	0.7016	0.6705	1	0.779	0.8692	0.6815	0.512	1	0.9148	0.8795	1	0.9044	0.8018	0.9568	0.8968	0.5977	1	1	1	0.9315	0.8028	1	1	0.8795	0.8493	0.8352
PPP4R1_44612_AA	0.5256	0.4362	0.4987	0.3802	0.5134	0.4379	0.3696	0.5587	0.3275	0.5963	0.3421	0.7916	0.3877	0.1472	0.4317	0.4962	0.4654	0.5587	0.481045	0.426	0.3988	0.3181	0.2968	0.4178	0.4987	0.5256	0.481045	0.3299	0.481045	0.5587	0.5587	0.5134	0.3702	0.2872	0.4871	0.4515	0.5404	0.6672	0.6332	0.5256	0.3877	0.4095	0.4904	0.4301	0.481045	0.5165	0.5192	0.4564	0.6175
SLMO1_44687_AD	0.735918	0.6851	0.8024	0.4653	0.8212	0.735918	0.5154	0.7886	0.735918	0.7437	0.735918	0.6592	0.7946	0.7668	0.735918	0.7946	0.735918	0.7437	0.735918	0.7241	0.5919	0.8286	0.6929	0.8212	1	1	0.6592	0.525	0.7119	0.735918	0.6462	0.7524	0.853	0.6929	0.8003	0.735918	0.8107	0.8376	0.8286	0.6171	0.7586	0.7303	0.8764	0.8097	0.6592	0.6031	0.8073	0.6592	0.7946
CEP76_44711_AA	0.861712	0.8934	0.8934	0.6197	1	0.7934	0.8848	0.8848	0.9008	0.861712	1	0.7364	1	0.861712	0.8848	0.9496	0.6769	0.8426	0.861712	0.9129	0.8748	1	0.861712	1	0.8302	0.861712	0.7586	0.6197	0.861712	0.8302	0.7774	0.7652	0.6506	0.7774	0.7516	1	0.8972	0.9179	1	0.861712	0.6886	1	0.8482	0.9362	0.861712	0.9179	0.7983	0.9008	1
LDLRAD4_44742_AD	1	0.91159	1	1	0.8032	0.91159	0.91159	0.7338	0.91159	0.91159	0.4981	0.5891	1	1	1	1	1	1	1	1	1	1	0.91159	0.7973	0.7486	0.7737	1	0.91159	0.8828	1	0.91159	1	1	1	0.5891	1	0.8224	0.9061	1	1	0.91159	0.6309	0.7486	0.7554	1	0.8539	1	1	0.91159
ABHD3_44778_AD	0.1517	0.0714	0.3756	0.104	0.2364	0.1862	0.0755	0.2099	0.1429	0.0882	0.0968	0.3151	0.28	0.2371	0.131	0.171	0.2031	0.1757	0.1522	0.2866	0.1462	0.2101	0.0262	0.1788	0.2808	0.0625	0.2561	0.5164	0.1176	0.3288	0.1976	0.2	0.1818	0.3185	0.2086	0.3217	0.3851	0.3133	0.2438	0.3745	0.1615	0.3518	0.3987	0.2526	0.7154	0.5565	0.3435	0.1266	0.0939
DTNA_45098_AA	1	0.6709	0.7398	0.7018	0.5043	0.6352	0.734	0.6938	0.6786	0.7368	0.7894	0.5946	0.7149	0.7188	0.832	0.7894	0.7538	0.9172	1	0.6972	0.7932	0.6539	0.8715	0.625	0.4642	0.6224	0.3782	0.7869	0.3785	0.748	0.6588	0.7672	0.725	0.6514	0.5742	0.9611	0.8396	0.7514	0.6434	0.7723	0.5782	0.7989	0.7245	0.5345	0.7051	0.8096	0.7151	0.7862	0.5532
ZNF397_45149_AD	0.2262	0.3924	0.4297	0.2304	0.3448	0.3494	0.3333	0.2956	0.245	0.1162	0.2027	0.3333	0.1871	0.2169	0.1619	0.2399	0.2982	0.2512	0.283	0.1619	0.2744	0.4068	0.1582	0.3448	0.2412	0.1648	0.1076	0.4942	0.1162	0.2475	0.382	0.2908	0.2083	0.1777	0.2141	0.4072	0.3494	0.238	0.1798	0.2019	0.2037	0.2608	0.1571	0.223	0.2597	0.3653	0.5344	0.2759	0.3303
ZNF24_45164_AA	0.1179	0.0416	0.2099	0.0506	0.1578	0.1208	0.0512	0.0671	0.0867	0.0626	0.0969	0.2334	0.0668	0.0962	0.0739	0.1029	0.0744	0.1066	1	0.1231	0.0641	0.1566	0.0569	0.0985	0.1081	0.1459	0.7799	0.1628	0.3026	0.0728	0.1226	0.1103	0.0892	0.1748	0.1492	0.0805	0.1401	0.0993	0.0655	0.1181	0.0443	0.1134	0.166	0.1207	0.3266	0.1123	0.1354	0.0939	0.0652
CTIF_45457_AD	0.522	0.2938	0.4282	0.4172	0.5169	0.4835	0.3443	0.2827	0.5142	0.7088	0.513	0.4835	0.4503	0.425	0.4636	0.3944	0.135	0.3843	0.365591	0.1835	0.6519	0.3843	0.4382	0.2598	0.3959	0	0.365591	0.4479	0.3188	0.3843	0.3597	0.3351	0.4282	0.3351	0.3843	0.3188	0.3655	0.3772	0.4153	0.3017	0.4937	0.3639	0.3314	0.2863	0.365591	0.4082	0.4835	0.3002	0.303
TCF4_45613_AD	0.7181	0.6776	0.8148	0.6903	0.8288	0.638514	0.5922	0.6464	0.663	0.6875	0.6377	0.6101	0.7511	0.7103	0.6758	0.6875	0.6701	0.6663	0.638514	0.6875	0.7147	0.6525	0.5626	0.456	0.8096	0.6377	0.638514	0.6204	0.638514	0.7012	0.5752	0.7076	0.6101	0.4853	0.569	0.6725	0.7333	0.7126	0.6244	0.7049	0.6875	0.6479	0.554	0.4853	0.6377	0.6121	0.5264	0.6644	0.7495
NFATC1_46241_AD	0.6332	0.780766	0.6791	0.8033	1	0.780766	0.7572	1	1	0.780766	0.8004	1	0.4006	1	1	0.6256	0.8239	0.7911	0.8004	0.582	1	0.780766	0.582	0.7005	0.6462	0.6672	0.780766	0.7959	0.780766	0.8273	0.7911	0.8575	1	0.780766	0.6902	0.9145	0.572	0.8618	0.8849	0.7005	1	0.5915	0.7697	0.7102	0.780766	1	0.7809	0.8575	0.6093
CIRBP_46429_AD	0.3049	0.6273	0.5309	0.4286	0.4376	0.514	0.4814	0.4157	0.6353	0.2348	0.612	0.3249	0.6263	0.6975	0.3547	0.3572	0.3727	0.5366	0.2268	0.3445	0.3758	0.6338	0.4826	0.5347	0.4702	0.4347	0.1912	0.456	0.2668	0.3597	0.3982	0.4844	0.4668	0.5195	0.5969	0.4802	0.5274	0.4817	0.5148	0.5162	0.3734	0.5262	0.7251	0.2909	0.3251	0.4475	0.7256	0.4	0.2421
CIRBP_46437_AA	0.4314	0.2463	0.5141	0.4366	0.364	0.2764	0.257	0.4162	0.3921	0.3301	0.4837	0.3309	0.2331	0.6383	0.6497	0.5757	0.5542	0.603	0.5273	0.7275	0.6371	0.6494	0.35	0.5331	0.514	0.4905	0.266	0.4188	0.5802	0.5647	0.6507	0.3865	0.6659	0.5902	0.6544	0.6436	0.5439	0.471	0.5022	0.7642	0.2818	0.5736	0.7354	0.5105	0.4168	0.7121	0.6073	0.5752	0.2532
RPS15_46485_AA	0.6847	0.514	0.487508	0.2247	0.4788	0.3857	0.2403	0.4278	0.487508	0.487508	0.3151	0.3688	0.5036	0.487508	0.3764	0.5447	0.648	0.487508	0.3281	0.487508	0.802	0.586	0.0855	0.4977	0.6267	0.7612	0.701	0.4324	0.4049	0.4615	0.487508	0.491	0.4553	0.4819	0.3496	0.3925	0.3288	0.4821	0.3112	0.487508	0.6352	0.8075	0.7347	0.6305	0.9207	0.4904	0.5126	0.4891	0.2013
CACTIN_46717_AD	0.3466	0.169327	0.4453	0.119	0.1655	0	0	0.181	0.169327	0.169327	0.2994	0	0.1039	0.1919	0	0.0979	0.169327	0	0.2503	0.2292	0.2343	0.0943	0	0	0.2259	0.0898	0.1986	0.3868	0.1109	0	0.4652	0	0.1257	0.287	0.2963	0.2325	0.1666	0.3006	0	0.1431	0.2619	0.2494	0.1985	0	0.2708	0.2506	0.1927	0.2187	0
HSD11B1L_46910_AA	0	0	0.4231	0.2714	0.3911	0.314638	0.4213	0.4242	0.2827	0.339	0.4188	0.3908	0.4869	0.2579	0.3077	0.289	0.2228	0.2953	0.051	0.2184	0.1997	0.1043	0.2274	0.2246	0.3259	0.3966	0.2838	0.3168	0.2873	0.2921	0.3174	0.2527	0.3438	0.352	0.2385	0.3153	0.2795	0.3841	0.2759	0.2218	0.3347	0.2113	0.2936	0.5218	0.4959	0.4153	0.1838	0.238	0.44
ZNF559_47277_AA	0.4482	0.6907	0.5427	0.5629	0.677	0.4545	0.5988	0.8063	0.8197	1	0.4707	0.4068	0.4373	0.4526	0.6145	0.6897	0.481	0.5763	0.588553	0.5875	0.8396	0.7673	0.6053	0.5962	0.5456	0.5528	0.588553	0.6463	0.588553	0.588553	0.4386	0.623	0.6183	0.5437	0.5413	0.6095	0.6338	0.4727	0.6713	0.6982	0.4614	0.5301	0.4733	0.4877	0.2498	0.4499	0.7454	0.7449	0.5143
ZNF559_47279_AD	0.6069	0.648	0.5752	0.6043	0.6984	0.384	0.7554	0.732	0.5366	0.669513	0.4269	0.6688	0.7623	0.7277	0.8713	0.6739	0.5773	0.5035	0.669513	0.5166	0.5876	0.4766	0.5619	0.4916	0.5478	0.5166	0.669513	0.9194	0.669513	0.669513	0.3483	0.6901	0.8038	0.6621	0.5876	0.8261	0.6405	0.5301	0.5268	0.7138	0.7688	0.7808	0.6751	0.6494	0.8769	0.546	0.7403	0.9237	0.6494
ZNF177_47302_AA	0.7203	1	1	1	1	1	0.8424	1	1	1	0.8113	1	0.8372	1	0.8849	1	1	0.9001	0.913009	1	1	1	0.7981	1	1	1	0.913009	0.9164	0.7413	0.913009	1	0.8375	0.5293	1	1	0.9435	1	1	0.5283	0.7992	1	1	1	1	0.9095	0.9364	1	1	1
ZNF177_47306_AA	0.3469	0.4487	0.7598	0.4877	0.6055	0.4215	0.5855	0.2428	0.323	0.3003	0.3948	0.4025	0.4093	0.4953	0.3361	0.4833	0.3121	0.5108	0.406877	0.4097	0.1581	0.7483	0.3812	0.2657	0.3156	0.6316	0.406877	0.4012	0.3586	0.406877	0.5027	0.5545	0.1479	0.6959	0.5931	0.5925	0.4225	0.4297	0.13	0.3059	0.4325	0.5736	0.4164	0.4523	0.635	0.6923	0.7532	0.544	0.4213
ZNF177_47307_AA	0.6404	0.7706	0.7862	0	0.560939	0.4976	0.5984	0.3909	0.388	0.4665	0.5742	0.4157	0.5169	0.4341	0.5831	0.453	0.4885	0.4948	0.5203	0.5991	0.6034	0.611	0.5675	0.4266	0.3251	0.7838	0.7464	0.5781	0	0.7464	0.5525	0.738	0.4131	0.489	0.5962	0.503	0.602	0.563	0.7474	0.5797	0.5396	0.5786	0.6908	0.7325	0.6565	0.6785	0.7243	0.7112	0.7495
ZNF266_47339_AD	1	0.4522	0.711	0.7193	0.9086	0.3685	0.7951	0.3226	0.732	1	0.7835	0.7594	0.9022	0.7852	0.8211	0.8013	0.8413	0.6765	0.766458	0.8726	0.7307	1	0.766458	0.6603	0.8725	0.8154	0.4943	0.8709	0.766458	0.6527	0.7854	0.715	0.7305	0.766458	0.8317	0.7237	0.8752	0.5507	0.866	0.9337	0.781	0.7568	0.9727	1	0.8234	0.8326	0.6756	0.5567	0.6988
ZNF266_47341_AD	1	0.4479	0.8076	0.8227	0.8326	0.371	0.7937	0.8171	0.6479	0.772794	0.7853	0.7053	0.8493	0.8034	0.6987	0.5703	0.7763	0.5315	0.772794	0.9307	0.5783	1	0.7958	0.7909	0.8817	0.7282	0.3307	0.6584	0.772794	0.4318	0.735	0.7487	0.5781	0.8287	0.7839	0.833	0.8612	0.8094	0.9289	0.9539	0.6731	0.8251	0.772794	1	0.8618	0.798	0.7775	0.8074	0.7577
ZNF561_47367_AA	0.3587	0.2557	0.2814	0.3223	0.1784	0.2814	0.2471	0.2747	0.3251	0.2353	0.2877	0.4129	0.1899	0.3486	0.1994	0.2959	0.3453	0.1838	0.296841	0.2548	0.1278	0.3299	0.1203	0	0.2988	0.2778	0.381	0.3659	0.296841	0.6286	0.1914	0.2066	0.3349	0.48	0.2353	0.3187	0.4048	0.3011	0.3299	0.4916	0.4075	0.35	0.4026	0.2814	0.4706	0.3092	0.2627	0.2778	0.1613
TMEM205_47658_AA	0.288932	0.4103	0.1085	0.3074	0.0665	0.1591	0.3152	0.3986	0.3557	0.5395	0	0.4319	0.3289	0.1241	0.4339	0.2215	0.1375	0.1747	0.2811	0.2314	0.4358	0.0857	0.464	0	0.1017	0.312	0.1246	0.1933	0.179	0.3052	0.2055	0.2677	0.415	0	0.2449	0.2332	0.2251	0.1654	0.2355	0.1741	0.2695	0.4808	0	0.2336	0.4956	0.0763	0.0982	0.2041	0.2798
TMEM205_47671_AD	0.507211	0.6355	0.2009	0.4877	0.112	0.507211	0.5445	0.5642	0.7196	0.7029	0.507211	0.6735	0.5498	0.51	0.4823	0.5363	0.2654	0.405	0.4463	0.5541	0.5702	0.5529	0.5921	0.507211	0.425	0.4803	0.3266	0.575	0.2965	0.698	0.454	0.4948	0.7902	0.507211	0.8439	0.4107	0.4891	0.1976	0.31	0.3231	0.5664	0.6362	0.507211	0.3301	0.7092	0.2308	0.2703	0.5453	1
ECSIT_47717_AD	1	0.6661	0.8378	0.7544	1	0.799346	0.6036	0.5433	0.803	0.799346	0.8033	0.6055	0.7999	0.8863	0.71	0.8836	1	0.781	0.8956	1	0.8252	0.7354	0.574	1	0.7831	0.8957	0.799346	0.9093	0.9239	0.666	0.8382	0.6645	1	1	0.7982	0.8787	0.874	0.8444	0.7659	1	0.7675	0.7549	0.8613	1	1	0.8534	0.8793	1	1
ACP5_47749_AA	0.528447	0.528447	0.528447	0.6246	0.5063	0.2831	0.7189	0.2863	0.528447	0.528447	0.7408	0.3367	0.4433	0.3513	0.528447	0.4638	0.4583	0.3607	0.6929	0.8135	0.667	0.6505	0.528447	0.4341	0.5485	0.6435	0.4895	0.528447	0.174	0.5199	0.528447	0.3403	0.4982	0.4161	0.4602	0.528447	0.4271	0.4602	0.5611	0.6054	0.6592	0.6651	0.5752	0.8186	0.528447	0.5371	0.2618	0.5983	0.528447
ZNF20_47779_AA	0.645653	0.6019	0.864	0.694	0.4757	0.645653	0.5853	0.6275	0.7313	0.645653	0.6878	0.864	0.9218	0.3525	0.7	0.6853	0.4757	0.7175	0.645653	0.5645	0.6447	0.7139	0.7	0.8032	0.6202	0.784	0.645653	0.6019	0.784	0.645653	0.645653	0.7313	0.4374	1	0.6792	0.7043	0.5384	0.645653	0.7605	0.645653	0.7313	0.6792	0.855	0.7313	0.645653	0.4305	0.7515	0.6662	0.7075
DHPS_47836_AD	1	0.8247	0.6941	0.8427	0.7714	0.7897	0.8555	1	0.8289	0.794689	0.5476	0.9443	0.6885	0.9085	0.8794	0.7605	1	0.7702	0.8731	0.7913	0.7016	0.7223	1	0.8764	0.8553	0.7962	1	0.6208	0.8483	0.894	0.6927	0.7653	0.8025	0.8065	0.6682	0.7725	0.8047	0.6958	0.7165	0.8926	0.8677	0.7654	0.7554	0.9557	0.8019	0.8457	0.7969	1	0.8194
HOOK2_47868_AD	0.1651	0.1871	0.3288	0.1626	0.3341	0.1361	0.1495	0.2668	0.1441	0.34	0.3158	0.4812	0.3527	0.3511	0.2634	0.2633	0.2381	0.2719	0.0896	0.2861	0.2016	0.2906	0.1816	0.2448	0.2768	0.3205	0.1503	0.3969	0.1827	0.457	0.4392	0.3503	0.2407	0.2752	0.4049	0.4647	0.5428	0.3074	0.2689	0.5059	0.2184	0.3569	0.4531	0.3448	0.6359	0.5213	0.4558	0.1271	0.1327
RTBDN_47875_AA	1	1	0.649	1	0.6819	0.6411	1	1	1	1	1	0.7986	0.807	0.5707	1	1	1	1	0.5411	1	0.7158	0.8049	1	1	1	0.8503	1	1	1	1	1	0.8654	0.6586	1	0.4792	1	0.5485	1	1	1	1	1	1	1	0.9	1	0.7964	1	1
ZNF333_48021_AA	0.2651	0.0965	0.1281	0.2166	0.2129	0.158947	0.1168	0.0673	0.1441	0.158947	0.1208	0.2092	0.2092	0.2092	0.2563	0.081	0.2962	0.1261	0.158947	0.2108	0.158947	0.1806	0.158947	0.0934	0.123	0.158947	0.158947	0.1738	0.158947	0.2428	0.3355	0.1073	0.158947	0.1575	0.1528	0.3511	0.1473	0.1709	0.158947	0.1669	0.2156	0.2485	0.1363	0.0911	0.3907	0.2879	0.284	0.1073	0.05
SMIM7_48190_AD	0.5768	0.6857	0.4747	0.7403	0.5331	0.7586	0.6709	0.7799	0.6112	0.5517	0.6859	0.6497	0.3866	0.6451	0.5607	0.6162	0.614	0.8502	0.9478	0.6166	0.4099	0.518	0.6054	0.5976	0.7391	0.7412	0.944	0.6745	0.6021	0.4622	0.2656	0.7481	0.5624	0.7486	0.4636	0.7371	0.7595	0.8264	0.5883	0.7134	0.5464	0.4768	0.7197	0.766	0.7936	0.6495	0.7717	0.6101	0.5607
NWD1_48207_AD	1	0.4867	1	0.8798	1	0.904105	0.6586	1	0.605	1	1	1	0.863	0.8822	0.5225	1	1	0.891	1	1	0.3188	0.8661	0.7814	1	1	1	1	0.5231	1	1	1	0.8597	1	1	1	0.9134	1	1	0.7186	1	1	0.8967	0.8889	1	1	1	1	0.8213	1
MYO9B_48231_AD	0.6377	0.618807	0.8288	0.569	0.5136	0.5098	0.5475	0.656	0.618807	0.618807	0.9064	0.6787	0.5803	0.7549	0.6063	0.5038	0.7788	0.5238	0.6063	1	0.3697	0.6644	0.4681	0.6204	0.8408	0.5308	0.386	0.6535	0.6875	0.6377	0.618807	0.6377	0.8408	0.8244	0.7012	0.6479	0.587	0.4186	0.4131	0.7984	0.618807	0.552	0.6575	0.5014	0.6377	0.6377	0.7549	0.552	0.3976
USHBP1_48246_AA	0.5922	0.7806	0.9174	0.638	0.5482	0.8206	0.8051	0.923	0.7329	0.6295	0.7696	0.7116	0.7303	0.786	0.6482	0.7901	0.8455	0.634	0.8185	0.8417	0.3638	0.8438	0.5665	0.6907	0.8993	0.8182	0.8394	0.8212	0.6647	0.9321	0.7575	0.7128	0.7563	0.7365	0.7511	0.7823	0.9055	0.7861	0.6039	0.7961	0.7287	0.7781	0.8229	0.8252	0.8132	0.8072	0.8771	0.8366	0.6958
ANO8_48279_AA	0.156589	0.0736	0.4599	0.1483	0.0638	0.0736	0.1199	0.1405	0	0.156589	0.2141	0.1371	0.0983	0.1629	0.156589	0.1499	0.156589	0.1622	0.2901	0.0294	0.0833	0.1925	0.156589	0.1199	0.1578	0.156589	0.156589	0.4466	0.156589	0.1329	0.1199	0.3527	0.4497	0.0638	0.1998	0.2464	0.1593	0.2088	0.0805	0.1697	0.179	0.2346	0.2464	0.1199	0.4327	0.1286	0.1697	0.2464	0.156589
FAM129C_48336_AA	1	1	0.9229	0.5026	1	0.8055	0.9194	1	0.8923	1	1	0.8307	0.7892	0.9367	1	0.9274	1	1	0.4456	0.54	0.871	1	1	1	0.4009	1	0.8563	1	1	0.8875	1	1	1	1	1	1	1	0.8339	0.7546	1	1	1	1	1	1	1	0.8999	1	1
KIAA1683_48414_AD	0.5755	1	1	0.7401	1	1	1	1	1	0.893798	1	1	1	0.7855	1	1	0.5986	0.8338	0.893798	1	1	1	1	0.6629	0.7306	1	0.404	0.9136	0.7094	1	1	1	0.83	1	0.7973	0.9243	0.8836	0.8921	0.7722	0.8592	1	0.8668	0.7256	1	0.7674	1	0.9572	1	1
KXD1_48462_AD	0.224155	0	0.1348	0.1049	0	0.2266	0.2559	0.2862	0.224155	0.224155	0.224155	0.2569	0.178	0.1316	0.224155	0.3954	0.224155	0.0929	0.0815	0.1132	0.3661	0.2577	0.194	0.2919	0.0931	0.1379	0.2799	0.2697	0.4336	0.2088	0.1537	0	0.3391	0.083	0.4145	0.5213	0.1943	0.4969	0.0479	0.1235	0	0	0.2427	0.1799	0.1941	0.224155	0.1407	0.082	0.3241
UBA52_48478_AD	0.631886	0.631886	0.7656	0.5075	0.778	0.5328	0.8658	0.6035	0.631886	0.631886	0.631886	0.6966	0.6695	0.631886	0.631886	0.5678	0.631886	0.631886	0.5972	0.8028	0.7249	0.3783	0.631886	0.6714	0.7507	1	0.7469	0.6009	0.5539	0.631886	0.5498	0.631886	0.8173	0.6894	0.7486	0.631886	0.3995	0.7258	0.3861	0.9135	0.5869	0.6836	0.5748	0.581	0.631886	0.631886	0.4689	1	0.5599
UBA52_48486_AD	1	1	0.6919	0.8708	0.8551	1	0.7454	0.8524	1	1	1	0.371	0.8511	0.7656	0.6656	0.8722	1	0.8939	1	0.7013	1	0.9092	1	1	1	0.7861	0.7158	0.95	1	1	1	0.9186	1	0.7815	0.8872	1	1	1	1	1	0.8933	1	1	1	0.8244	1	0.7102	0.896	0.9279
SUGP2_48548_AD	0.3202	0.1188	0.1684	0.1317	0.1501	0.3218	0.1872	0.1936	0.1839	0.0824	0.2306	0.1109	0.2123	0.1584	0.2653	0.2164	0.2555	0.1793	0.0262	0.3338	0.2238	0.5429	0.115	0.2413	0.3511	0.1554	0.0533	0.0768	0.0796	0.274	0.3012	0.2521	0.1347	0.2924	0.2674	0.234	0.3796	0.1923	0.101	0.1509	0.2483	0.3178	0.3001	0.2298	0.1324	0.3545	0.2631	0.3635	0.1442
PBX4_48662_AD	0.5724	0.5828	0.4973	0.4585	0.6506	0.525265	0.1344	0.383	0.7983	0.525265	0.4112	0.5116	0.4706	0.5116	0.4517	0.5277	0.5207	0.445	0.5709	0.5116	0.7884	0.6934	0.7652	0.525265	0.4933	0.5156	0.525265	0.3337	0.5449	0.2369	0.4439	0.5417	0.5984	0.525265	0.6995	0.3903	0.4112	0.3177	0.5959	0.2853	0.4369	0.371	0.8582	0.42	0.1464	0.3771	0.5688	1	0.5828
ZNF101_48678_AD	0.735226	0.5152	0.7184	0.7875	0.735226	0.735226	0.9054	0.8844	0.735226	0.735226	0.5344	0.7416	0.6991	0.6828	0.775	0.6906	0.7219	0.8614	0.6862	0.7089	0.5152	0.9054	0.77	0.9305	0.7657	0.8959	0.8701	0.7416	0.735226	0.6966	0.7928	0.5183	0.7184	0.782	0.735226	0.5893	1	0.9387	0.77	0.7246	0.5893	0.7566	0.7246	0.9256	0.735226	0.3894	0.817	0.7246	0.6145
ZNF430_48743_AA	0.3672	0.9018	0.8713	0.6769	0.7206	0.5417	0.8286	0.7014	0.6031	0.72592	0.8286	0.7946	0.4085	0.6171	0.8286	0.7558	0.7206	0.4916	0.72592	0.6367	0.525	0.7547	0.72592	0.6735	0.6989	0.72592	0.72592	0.6171	0.72592	0.72592	0.72592	0.6286	0.8286	0.5919	0.853	0.8417	1	0.5517	0.7668	0.72592	0.6837	0.8417	0.9018	0.6843	0.72592	0.6111	0.7206	0.7514	0.7141
ZNF738_48765_AA	1	0.8974	1	0.9523	0.7236	0.7892	0.8571	0.8822	0.8722	1	0.8849	0.9526	0.7837	1	1	0.9234	1	1	1	0.5644	0.4848	1	0.8413	0.837	0.8127	1	1	0.925	0.7402	0.4985	0.8267	0.8297	0.8794	0.7769	0.8413	0.9346	0.7054	0.8981	0.7266	0.9382	0.9305	0.787	0.8139	0.9647	1	0.9164	0.7069	0.8899	0.8169
ZNF302_48993_AD	0.2397	0.2751	0.6061	0.3895	0.5507	0.2594	0.2205	0.5347	0.8465	0.488898	0.3183	0.6118	0.7592	0.5124	0.5969	0.4591	0.2594	0.6948	0.488898	0.5226	0.4058	0.4032	0.1893	0.7243	0.3895	0.479	0.488898	0.5185	0.488898	0.4605	0.5982	0.2689	1	0.38	0.38	0.6332	0.5456	0.3567	0.1646	0.3663	0.4407	0.6829	0.5964	0.6603	0.6118	0.5885	0.486	0.3602	0.7429
ZNF302_48994_AD	0.4244	0.3603	0.8374	0.6257	0.6445	0.3296	0.3645	0.5947	0.7207	0.622869	0.3597	0.7468	0.6057	0.8576	0.6608	0.6113	0.6629	0.5611	0.622869	0.86	0.6151	0.5976	0.4958	0.3296	1	0.6324	0.622869	0.8411	0.622869	0.4441	0.8092	0.4625	0.5856	1	0.229	0.632	0.8884	0.304	0.1557	0.73	0.5974	0.7159	0.8481	0.8197	0.7468	0.8022	0.5299	0.6483	0.8069
ZNF181_48998_AA	0.4462	0.5828	0.4916	0.5632	0.392	0.2165	0.392	0.7267	0.4916	0.512837	0.6171	0.512837	0.6286	0.4916	0.557	0.5558	0.5211	0.3767	0.512837	0.381	0.512837	0.4916	0.512837	0.3259	0.2661	0.512837	0.512837	0.5801	0.512837	0.512837	0.3559	0.4037	0.525	0.512837	0.5919	0.6351	0.293	0.6592	0.4204	0.512837	0.4699	0.6445	0.4916	0.4916	0.512837	0.5632	0.5154	0.6769	0.4129
U2AF1L4_49277_AA	0.2472	0.3207	0.5091	0.6711	0.5826	0.6694	0.5337	0.6475	0.577	0.1689	0.4532	0.6286	0.4026	0.4781	0.6952	0.6684	0.7045	0.6633	0.7324	0.6537	0.6025	0.7684	0.33	0.5659	0.681	0.4116	0.5793	0.7044	0.672	0.6558	0.6012	0.4809	0.5728	0.7243	0.6	0.7772	0.7132	0.576	0.6348	0.7004	0.734	0.731	0.6284	0.6654	0.7862	0.7448	0.6006	0.5141	0.5226
C19orf55_49291_AA	1	0.916	0.9385	0.8842	0.9436	0.9252	0.8358	0.708	0.6452	0.860564	0.7442	0.929	1	1	0.7571	0.7785	0.708	0.8791	0.860564	0.8216	1	0.7027	0.8533	0.860564	0.708	1	0.860564	0.712	0.8533	0.860564	0.766	0.9357	1	0.8533	0.8254	0.9642	0.9515	0.8791	0.5217	0.6857	0.5926	0.7843	0.807	0.7773	0.5926	0.9134	0.9357	1	0.9515
CAPNS1_49367_AA	0.7036	0.6445	0.525	0.6851	0.8186	0.7946	0.4916	0.6111	0.6351	0.8855	0.7946	0.5919	0.5919	0.8131	0.5584	0.5919	0.5752	0.7838	0.6097	0.714667	0.6929	0.853	0.5371	0.8627	0.6592	0.714667	0.714667	0.6706	0.7364	0.7499	0.714667	0.5687	0.6351	0.714667	0.5708	0.5966	0.4362	0.8457	0.8441	0.6592	0.5417	0.9263	0.7719	0.4916	0.8713	0.7437	0.7538	0.6885	0.7074
YIF1B_49610_AD	0.8637	0.731735	0.731735	1	0.8392	0.6509	0.731735	0.7322	0.5986	0.731735	0.723	0.6443	0.7489	0.804	0.5986	0.7131	0.6509	0.731735	0.4895	0.6838	0.8173	0.7637	0.829	0.6559	0.7131	0.731735	0.8564	0.731735	0.8392	0.8392	0.731735	0.5986	0.5986	1	0.8995	0.4272	0.7637	0.8392	0.7991	0.4272	0.829	0.8995	0.6416	0.5986	0.731735	0.8913	0.6443	0.544	0.731735
SIRT2_49713_AA	0.4102	0.2405	0.7857	0.2124	0.5921	0.1065	0.4295	0.162	0.274	0.5789	0.4419	0.5255	0.5168	0.608	0.3742	0.2732	0.4783	0.3143	0.211	0.3854	0.2516	0.5385	0.4331	0.4783	0.5168	0.5168	0.4783	0.7423	0.3452	0.4983	0.534	0.526	0.3333	0.5394	0.2758	0.6826	0.4598	0.6226	0.3793	0.6608	0.414	0.5632	0.6836	0.5957	0.947	0.6735	0.5406	0	0.3747
ZFP36_49820_AD	0.0983	0.1273	0.3054	0.1333	0.0861	0.1052	0.1908	0.1391	0.236	0.1406	0.1615	0.2769	0.152	0.2529	0.1885	0.1298	0.2117	0.3076	0.1434	0.4462	0.1751	0.2416	0.1284	0.1283	0.2384	0.1385	0.2705	0.1486	0.124	0.2536	0.5331	0.2509	0.1185	0.3852	0.1071	0.2102	0.4435	0.1476	0.0661	0.3739	0.1621	0.3863	0.181	0.1889	0.3842	0.4047	0.3121	0.0831	0.0858
ZNF780B_49855_AD	0.8627	1	0.7871	0.6331	0.715633	0.715633	0.7473	0.6246	1	0.715633	0.4965	0.5259	0.715633	0.8554	0.8331	0.7473	0.7114	0.6675	0.6893	0.7871	0.5966	0.9487	0.715633	0.8554	0.8381	0.9058	0.7871	0.5641	0.8381	0.6893	0.8027	0.7306	0.8905	0.8027	0.542	0.5521	0.7871	0.8027	0.9367	0.8027	0.7689	0.8381	0.8905	0.9173	0.7283	0.8161	0.7952	0.6396	0.402
ZNF780A_49866_AA	0.2567	0.311	0.3559	0.2321	0.291851	0.1947	0.2789	0.6929	0.4204	0.3672	0.2339	0.2165	0.4583	0.3259	0.2973	0.293	0.2602	0.1899	0.3259	0.2117	0.3259	0.291851	0.1078	0.291851	0.4293	0.3053	0.1737	0.3559	0.3259	0.1495	0.3006	0.1717	0.291851	0.293	0.3259	0.3259	0.3006	0.291851	0.1621	0.2567	0.4916	0.293	0.2087	0.097	0.2165	0.2872	0.2567	0.4129	0.3053
C19orf47_49883_AD	0.1632	0.135	0.2172	0.2685	0.2497	0.362	0.3655	0.304	0.214114	0.3843	0.2724	0.2724	0.2378	0.1611	0.2863	0.2761	0.5098	0.1455	0.214114	0.0515	0.2938	0.118	0.0587	0.4452	0.5336	0.2378	0.214114	0.2843	0.3843	0.135	0.2575	0.1048	0.5098	0.0819	0.2938	0.4245	0.0724	0.1455	0.0979	0.0992	0.2378	0.1218	0.2938	0.3843	0.214114	0.0942	0.221	0.1218	0.3568
C19orf54_49971_AD	0.4115	0.8549	0.6836	1	1	1	0.7699	1	1	1	0.5476	0.68	0.8288	0.5232	0.821045	0.7462	0.821045	1	1	1	1	0.3535	0.4162	0.8155	1	1	0.4854	0.847	0.7571	0.7895	0.821045	1	0.821045	0.612	0.4986	0.6551	1	0.7538	0.5145	0.821045	0.7072	0.8013	0.7859	0.7016	1	0.7706	1	0.4798	0.8585
TMEM91_50047_AA	0.782	0.3246	0.7468	0.8835	0.5783	0.3805	0.8762	0.5764	0.484129	0.8434	0.5219	0.5971	0.4439	0.5683	0.484129	0.7057	0.484129	0.1993	0.7647	0.7095	0.0886	0.5164	0.3843	0.6022	1	0.7812	0.6253	0.2395	0.6884	0.484129	0.4697	0.4541	0.5413	0.4488	0.5592	0.2461	0.4973	0.7467	0.652	0.7261	0.8086	0.3206	0.4102	0.3686	0.5273	0.3942	0.484129	0.484129	0.484129
TMEM91_50049_AA	0.7772	0.2837	0.7209	0.7156	0.8759	1	0.7391	0.5567	0.640589	0.7525	0.5961	0.853	0.4434	0.5526	0.640589	0.8894	0.640589	0.6169	0.8324	0.8804	0.1772	0.7463	0.6263	0.492	0.3771	0.5279	0.8734	0.9008	0.7677	1	0.5104	0.5461	0.6821	0.8213	0.6338	0.4589	0.5018	0.6812	0.6766	0.6197	0.6424	0.6037	0.3797	0.8133	0.6363	0.6058	0.640589	0.640589	0.2929
TMEM91_50050_AA	0.4773	0.4019	0.4262	0.2162	0.8147	1	0.664995	0.4533	0.664995	0.664995	0.5423	0.7856	0.494	0.4633	0.664995	0.7366	0.664995	0.8536	0.6593	0.664995	0.6439	0.7186	0.7343	0.361	0.664995	0.2432	0.815	0.9711	0.6378	0.664995	0.5319	0.5763	0.6209	0.822	0.5651	0.7323	0.5032	0.3962	0.5078	0.386	0.2993	0.7546	0.4391	0.8627	0.648	0.6885	0.4836	0.664995	0.664995
TMEM91_50054_AA	0.5321	0.3519	0.6744	0.5847	0.5074	0.3474	0.6538	0.2751	0.514167	0.7537	0.5	0.7071	0.3897	0.5103	0.514167	0.6746	0.4027	0.4489	0.7704	0.7127	0.1259	0.5036	0.3326	0.5287	0.27	0.5015	0.6383	0.5025	0.748	1	0.5118	0.5489	0.6213	0.3408	0.6849	0.4634	0.463	0.7297	0.8642	0.4354	0.8161	0.2321	0.1726	0.3516	0.796	0.6104	0.514167	0.2635	0.294
TMEM91_50055_AA	0.2314	0.4764	0.3733	0.134	0.3934	0.4473	0.53645	0.2009	0.53645	0.53645	0.4475	0.6086	0.439	0.4229	0.53645	0.4229	0.53645	0.7479	0.5683	0.4254	0.5476	0.4674	0.4563	0.3944	0	0.2267	0.5328	0.7892	0.6139	0.53645	0.5338	0.5804	0.5585	0.3432	0.6204	0.7377	0.4679	0.4545	0.7596	0.2306	0.5115	0.3777	0.2126	0.4383	0.8053	0.6947	0.4289	0.53645	0.53645
TMEM91_50056_AA	0.7029	0.7135	0.7081	0.7516	0.6956	0.5487	0.8852	0.5521	0.8214	0.7864	0.8192	0.8385	0.7424	0.7829	0.770898	0.8452	0.8253	0.8422	0.8977	0.8432	0.432	0.8023	0.75	0.7833	0.5772	0.8167	0.8261	0.7535	0.8894	0.770898	0.8169	0.8115	0.8505	0.6776	0.8418	0.8629	0.7994	0.8234	0.9574	0.7582	0.9175	0.5543	0.4986	0.7604	0.8879	0.7322	0.6697	0.6082	0.770898
TMEM91_50059_AA	0.3665	0.1822	0.4935	0.3431	0.342	0.3544	0.2018	0.2622	0.0677	0.5195	0.2034	0.3743	0.2007	0.2399	0.245382	0.3109	0.1282	0.1373	0.3235	0.3486	0.1716	0.2127	0.161	0.2534	0.2282	0.2064	0.3144	0.266	0.3137	0.6478	0.2077	0.2457	0.2393	0.209	0.3228	0.1282	0.1964	0.4021	0.2633	0.2217	0.3073	0.1927	0.1844	0.1468	0.3583	0.3779	0.0524	0.1903	0.4522
TMEM91_50060_AA	0.1276	0.2704	0.2133	0.0528	0.2401	0.4412	0.0282	0.1851	0.0921	0.262179	0.1662	0.2659	0.2297	0.1783	0.262179	0.1325	0.0624	0.3641	0.1507	0.1334	0.6297	0.1864	0.2376	0.1614	0	0.0682	0.2195	0.5675	0.1884	0.262179	0.2179	0.2633	0.1917	0.2077	0.2565	0.3198	0.1947	0.1666	0.1434	0.0964	0.0924	0.3245	0.2229	0.1977	0.3645	0.4647	0.2705	0.262179	0.262179
ZNF575_50205_AA	0.8486	0.8486	1	0.8968	0.7464	1	0.6271	0.7605	0.8937	0.826031	0.5991	0.9487	0.727	0.8346	0.8265	0.8078	0.826031	1	1	0.826031	0.8078	0.8112	0.8078	0.9098	0.8486	0.826031	0.7969	0.7969	0.8937	1	0.6624	0.8997	0.8486	1	0.8486	0.826031	0.6514	0.6727	0.7605	1	0.905	0.6776	1	0.7234	0.826031	0.6916	0.7493	1	0.8486
ZNF234_50284_AD	0.3742	0.2993	0.7352	0.6493	1	0.7736	0.204	1	0.7736	0.571837	0.379	0.8103	1	0.6103	0.3844	0.5427	0.5992	0.3905	0.571837	0.6578	0.5617	0.6578	0.4607	0.5036	0.2993	0.571837	0.571837	0.5617	0.571837	0.571837	0.4607	0.1547	0.571837	0.571837	0.571837	0.7077	0.5617	0.2993	0.8567	0.571837	0.5262	0.5262	0.5325	0.6527	0.571837	0.7936	0.6578	0.5875	0.7621
ZNF229_50326_AD	0.5315	0.939	0.8745	0.6371	1	0.6261	0.7447	0.8451	0.7848	0.810271	0.8861	0.6781	0.5841	1	0.786	0.8062	1	0.8587	0.810271	0.8445	1	1	1	0.802	0.7549	0.802	1	0.792	0.810271	1	0.7153	0.781	0.7596	0.5486	0.7885	0.8111	1	0.6299	0.8294	0.8383	0.8082	1	0.7242	0.6406	1	0.8483	0.822	0.7447	0.6218
ZNF229_50327_AD	1	0.7129	1	0.9118	1	0.832	1	1	0.8806	0.89907	0.8845	1	0.8061	0.8978	0.88	0.9266	0.7901	1	0.89907	1	0.8031	1	0.7968	1	1	1	0.4226	1	0.89907	1	0.8317	0.9167	1	1	0.6434	1	0.8783	1	0.8247	0.8373	1	1	0.9287	0.8381	1	1	0.752	0.7857	0.8487
CLPTM1_50381_AD	0.754996	0.723	0.8637	0.6509	0.3949	0.754996	0.8343	0.6997	0.7704	1	0.5776	0.3833	0.723	0.723	0.8439	0.6431	0.7366	0.7704	0.754996	0.528	0.754996	1	0.4272	1	0.5986	0.754996	0.754996	0.7079	0.754996	0.6722	0.6819	0.7799	1	0.5137	1	0.5108	0.6266	0.8173	0.6619	1	0.5662	1	1	1	1	0.8483	0.7752	1	1
GEMIN7_50399_AD	0.6776	0.5363	0.6343	0.7354	0.3551	0.3474	0.5062	0.4862	0.2793	0.5823	1	0.7308	0.8959	0.7042	0.6368	0.3561	0.4332	0.6046	0.4372	0.7087	0.5177	0.7967	0.6149	0.7666	0.6142	0.612	0.546	0.462	0.51	0.6446	0.462	0.4022	0.583933	0.3634	0.4645	0.7062	0.7125	0.5578	0.3675	0.5689	0.5774	0.3586	0.5079	0.5879	0.51	0.649	0.2118	0.5735	0.8418
GEMIN7_50400_AD	0.7404	0.8437	0.5654	0.7023	0.7124	0.7269	0.7193	0.73	0.6053	0.4319	0.2462	0.5524	0.4624	0.6362	0.8142	0.6904	0.4834	0.7794	0.7372	0.791	0.5811	0.9161	0.5156	0.6033	0.8121	0.3621	0.658	0.7362	0.5272	0.4973	0.7556	0.7351	0.7828	0.8419	0.6844	0.8402	0.4645	0.6543	0.6939	0.822	0.8541	0.7512	0.7593	0.6131	0.6408	0.7667	0.7946	0.8535	0.6804
TRAPPC6A_50412_AD	0.4822	0.4093	0.3608	0.2963	0.4055	0.084	0.6064	0.2422	0.5305	0.3757	0.3691	0.2811	0.5403	0.3619	0.2842	0.3862	0.134	0.3922	0.5106	0.3158	0.2512	0.4004	0.3784	0.1464	0.431	0.3652	0.2547	0.5843	0.5038	0.3191	0.2899	0.3679	0.2734	0.4125	0.3578	0.4511	0.1902	0.6136	0.4464	0.2133	0.3842	0.446	0.2935	0.2973	0.3028	0.4947	0.4633	0.4539	0.4422
FOSB_50453_AD	1	0.9749	1	0.9688	0.926434	0.926434	0.9461	0.926434	1	0.7771	0.8449	0.8999	0.9457	0.9675	0.9667	1	1	0.9872	0.926434	0.9408	0.8437	1	0.9155	1	1	0.711	0.926434	1	0.9241	1	1	0.9672	0.9281	1	1	0.949	1	0.889	1	0.9138	1	0.9597	1	0.8638	0.9222	0.905	1	0.9715	0.8777
DMPK_50521_AA	0.6398	0.5566	0.6212	0.5515	0.6145	0.5893	0.5725	0.5152	0.4335	0.5274	0.6326	0.5344	0.6966	0.8271	0.7356	0.7648	0.9054	0.6765	0.7612	0.6145	0.645723	0.6326	0.77	0.5344	0.5127	0.5223	0.2907	0.6523	0.7612	0.4889	0.8115	0.755	0.6862	0.5893	0.7184	0.661	0.6085	0.5344	0.5893	0.6944	0.4556	0.7246	0.5649	0.4059	0.5426	0.6145	0.5991	0.4177	0.5605
DMPK_50526_AA	0.185	0.3801	0.5772	0.5785	0.229	0.3739	0.1366	0.2568	0.1055	0	0.2075	0.4106	0.2637	0.3064	0.2781	0.4611	0.4124	0.1446	0.3432	0.2453	0.4438	0.2486	0.2571	0.4611	0.2416	0.2633	0.2009	0.2511	0.3791	0.3434	0.4013	0.2018	0.3863	0.236	0.159	0.2772	0.3965	0.1537	0.241	0.3097	0.4048	0.4826	0.2347	0.1799	0.5887	0.1654	0.204	0.2732	0.1071
FKRP_50592_AD	0.2821	0.3708	0.2953	0.1486	0.2283	0.2056	0.3725	0.1888	0.3137	0.3099	0.2249	0.2953	0.2789	0.3259	0.4486	0.2821	0.0824	0.2923	0.30708	0.3438	0.3636	0.3636	0.1732	0.0728	0.1054	0.1908	0.30708	0.386	0.43	0.2122	0.3204	0.1026	0.4204	0.3099	0.2907	0.2847	0.1947	0.2093	0.2739	0.1226	0.375	0.3042	0.2789	0.4088	0.5946	0.6596	0.4345	0.1401	0.3099
SAE1_50630_AD	0.3693	0.4592	0.5927	0.473	0.366642	0.366642	0.3071	0.4818	0.2879	0.366642	0.5046	0.2039	0.2916	0.4849	0.5294	0.4019	0.366642	0.4007	0.4921	0.176	0.4513	0.3609	0.421	0.4292	0.0685	0.3398	0.366642	0.5228	0.3388	0.366642	0.2001	0.4464	0.4777	0.3088	0.0842	0.4537	0.0993	0.5098	0.4487	0.366642	0.1372	0.4188	0.2272	0.4072	0.366642	0.4221	0.4356	0.2622	0.4642
MEIS3_50645_AA	0.3071	0.044	0.0693	0.0875	0.0207	0.1124	0.0221	0.1433	0.0577	0.0733	0.0829	0.2626	0.1319	0.0915	0.0488	0.0501	0.1005	0.0829	0.153918	0.2911	0.2404	0.2068	0.1326	0.0808	0.2714	0.2542	0	0.0569	0.3877	0.1919	0.1616	0.0307	0.1085	0.3877	0.1184	0.1201	0.2589	0.1576	0.2053	0.1666	0.0533	0.1042	0.1559	0.0501	0.5372	0.4418	0.0397	0.2867	0.0595
LIG1_50689_AD	0.1803	0.1896	0.2785	0.1435	0.2242	0.0685	0.1766	0.206	0.1244	0.1206	0.3243	0.1986	0.253	0.2392	0.342	0.274	0.4892	0.4488	0.1955	0.4862	0.1686	0.1162	0.0799	0.1797	0.3609	0.1671	0.2124	0.4753	0.1627	0.3048	0.4542	0.3591	0.2172	0.3589	0.3436	0.3807	0.4027	0.2135	0.1468	0.2998	0.2428	0.4283	0.416	0.2527	0.5855	0.2945	0.3669	0.1899	0.0685
CARD8_50716_AA	0.1346	0.22	0.4	0.1918	0.2615	0.2628	0.2451	0.1943	0.1521	0.297431	0.3374	0.3678	0.3425	0.4074	0.2396	0.1543	0.3033	0.3325	0.297431	0.2815	0.2615	0.4331	0.0957	0.3293	0.4217	0.3793	0.297431	0.2429	0.2558	0.3538	0.39	0.4851	0.071	0.4424	0.3459	0.3866	0.6533	0.1933	0.2088	0.2836	0.3143	0.3143	0.2973	0.3538	0.7249	0.3704	0.3183	0.2146	0.0668
CARD8_50719_AD	0.392	0.3065	0.2052	0.1545	0.1651	0.3254	0.3524	0.1926	0.0368	0.0971	0.3725	0.1114	0.2821	0.2662	0.2468	0.1299	0.3004	0.1849	0.1379	0.2721	0.1065	0.1913	0.1056	0.3233	0.1197	0.2307	0.3788	0.3351	0.4367	0.1414	0.0635	0.179	0.2481	0.245754	0.1983	0.2064	0.4348	0.2449	0.0747	0.2528	0.171	0.2594	0.1829	0.1504	0.2968	0.1767	0.3344	0.1643	0.1529
SPHK2_50793_AD	0.1841	0.3379	0.5301	0.3372	0.2733	0.1769	0.4426	0.3607	0.3793	0.360604	0.4622	0.22	0.2386	0.3793	0.4622	0.22	0.5007	0.4112	0.3607	0.6007	0.5436	0.3259	0.392	0.1811	0.4037	0.2733	0.360604	0.3607	0.392	0.4674	0.2733	0.5301	0.3259	0.305	0.4773	0.3995	0.1583	0.6233	0.5426	0.3969	0.5563	0.381	0.2614	0.2733	1	0.3715	0.3757	0.2476	0.3259
RUVBL2_50864_AD	0.1148	0.0961	0.1502	0.2351	0.1532	0.2853	0.1331	0.3708	0.1379	0.2654	0.3557	0.1212	0.3774	0.1074	0.0771	0.1425	0.0784	0.1029	0.0707	0.5297	0.0518	0.2902	0.1795	0.1456	0.184	0.198	0.2472	0.3525	0.0741	0.2152	0.151	0.0814	0.2413	0.3049	0.097	0.3051	0.3545	0.3411	0.0727	0.1626	0.2091	0.3397	0.187	0.2936	0.5658	0.163	0.1251	0.3819	0.1846
RUVBL2_50868_AD	0.3405	0.3172	0.4411	0.6772	0.4442	0.769	0.4946	0.743	0.4334	0.8649	0.8484	0.7199	0.7843	0.6093	0.6505	0.6249	0.6009	0.4163	0.3329	0.869	0.2633	0.7937	0.7301	0.3927	0.6017	0.777	0.7346	0.7299	0.3741	0.8659	0.6332	0.4022	0.6674	0.8415	0.44	0.8077	0.8007	0.773	0.5436	0.5828	0.8878	0.8329	0.6225	0.7508	0.9257	0.472	0.6526	0.8265	0.5102
SNRNP70_50884_AD	0.9824	0.9438	0.9457	0.8688	0.8154	0.8693	0.8987	0.9461	0.9225	0.9527	0.942	0.9229	0.8707	0.8913	0.8075	0.8804	0.8583	0.9081	0.7937	0.8971	0.7993	0.8978	0.7897	0.9076	0.9223	0.7196	0.7266	0.8148	0.809	0.8783	0.9115	0.8487	0.7819	0.9445	0.8509	0.7774	0.9146	0.9236	0.723	0.9348	0.816	0.9552	0.97	0.8926	0.8438	0.9043	0.9487	0.8181	0.8502
SNRNP70_50885_AD	0.8654	0.3613	0.2848	0.3433	0.3324	0.2249	0.2847	0.6151	0.338064	0.338064	0.4436	0.4802	0.1372	0.37	0.2829	0.3849	0.1733	0.3157	0.4467	0.3255	0.3324	0.3084	0.2313	0.429	0.4914	0.1838	0.3249	0.2966	0.4086	0.2619	0.1882	0.3598	0.1474	0.4825	0.3697	0.2103	0.429	0.3839	0.2965	0.5966	0.1624	0.4665	0.6073	0.3502	0.4169	0.2089	0.4954	0.1282	0.4154
TEAD2_50920_AD	0.3525	0.292685	0.292685	0.292	0.1313	0.292685	0.3932	0.1416	0.2058	0	0.1803	0.3121	0.3884	0.3121	0.292	0.2891	0.292685	0.4572	0.292685	0.3525	0.3461	0.3525	0.1849	0.1536	0.1849	0.2139	0.3121	0.1678	0.2841	0.2538	0.3858	0.2873	0.2322	0.0916	0.1147	0.2608	0.2092	0.3769	0.3121	0.2322	0.28	0.3583	0.2092	0.1849	0.4757	0.2471	0.2322	0.3351	0.292685
IRF3_50997_AD	0.2569	0.3077	0.4706	0.2915	0.7158	0.2703	0.5872	0.2467	0.5091	0.7805	0.498356	0.4706	0.4255	0.1346	0.4706	0.4138	0.7	0.1931	0.5116	0.7568	0.7134	0.5714	0.4706	0.5091	0.4716	0.25	0.4545	0.5	0.4112	0.6551	0.7568	0.2286	0.498356	0.6038	0.3333	0.198	0.6604	0.3636	0.3498	0.9231	0.5361	0.6135	0.4414	0.4608	0.5263	0.5333	0.6897	0.5135	0.3237
IRF3_51023_AD	0.5579	1	1	0.7917	1	0.4777	1	0.8443	0.3806	0.765711	0.1457	0.5939	1	1	1	0.7714	1	0.6603	0.4996	1	1	0.6175	0.765711	0.765711	1	0.4146	0.2377	1	0.3597	0.7677	1	1	0.765711	1	0.4501	1	0.8309	1	1	1	0.3113	1	1	0.8816	1	0.8507	0.8556	0.7259	0.593
FUZ_51083_AD	0.5681	0.0955	0.1897	0.0891	0.3804	0.4686	0	0.4826	0.309	0.3806	0.2529	0.421	0.1814	0.3654	0.1715	0.3544	0.4464	0.3536	0.5348	0.6495	0.6222	0.3393	0.335	0.5786	0.1252	0.4477	0.28	0.4763	0.0877	0.4265	0.473	0.3278	0.4103	0.4855	0.1348	0.5411	0.2799	0.3873	0.471	0.7532	0.4019	0.5059	0.172	0.614	0.5146	0.6365	0.397	0.7613	0.7633
NUP62_51124_AD	0.7273	0.7081	0.7595	0.6156	0.9108	0.8889	0.7642	0.7187	0.7762	0.799	0.6182	0.8549	0.7017	0.782	0.6731	0.6554	0.8686	0.6323	0.8369	0.6723	0.6361	0.6942	0.7668	0.8558	0.8315	0.8844	0.7451	0.7157	0.8571	0.7374	0.771	0.7368	0.6808	0.7065	0.844	0.7302	0.7863	0.8261	0.6263	0.7231	0.5468	0.8317	0.7144	0.5922	0.9414	0.7842	0.6216	0.7038	0.6745
NUP62_51128_AA	0.1928	0.3613	0.3827	0.3115	0.6702	0.5039	0.3841	0.4633	0.4446	0.0905	0.322	0.1766	0.4013	0.3285	0.2372	0.4261	0.2833	0.386	0.350262	0.3817	0.4208	0.2826	0.2517	0.201	0.6852	0.4734	0.350262	0.3384	0.350262	0.6829	0.1273	0.2023	0.2244	0.3946	0.2489	0.5067	0.4059	0.407	0.3778	0.4535	0.1621	0.2844	0.2762	0.3477	0.350262	0.4591	0.5029	0.3215	0.3818
ZNF473_51161_AA	0.685902	0.6909	1	0.5277	0.5277	0.5014	0.7904	0.7458	0.6449	0.685902	0.6656	0.7315	0.5946	0.5946	0.7085	0.4694	0.5946	0.6163	0.685902	0.7992	0.8073	0.6449	0.7702	0.456	0.685902	0.2953	0.685902	0.8261	0.685902	0.685902	0.685902	0.6263	0.7904	0.7702	0.685902	0.6263	0.6058	0.6974	0.4853	0.685902	0.5946	0.8217	0.6263	0.7964	0.685902	0.5946	0.7904	0.6854	0.6143
FAM71E1_51199_AA	0.3929	0.6331	0.4416	0.5143	0.618	0.5278	0.649	0.6777	0.6937	0.5227	0.5125	0.6504	0.3593	0.4283	0.8191	0.4351	0.584744	0.7097	0.4803	0.5287	0.6743	0.7495	0.3267	0.6792	0.6058	0.6546	0.5366	0.3807	0.66	0.538	0.5159	0.5227	0.4275	0.6444	0.5641	0.6777	0.5907	0.3929	0.4322	0.4819	0.5338	0.6704	0.5907	0.6047	0.5116	0.4753	0.7371	0.7035	0.6331
ZNF160_51658_AA	0.0728	0.1642	0.0728	0.44	0.4024	0.3438	0.3548	0.3293	0.2821	0.381668	0.4661	0.3595	0.4853	0.3708	0.6836	0.3017	0.4853	0.541	0.381668	0.2723	0.3438	0.2973	0.381668	0.3099	0.567	0.381668	0.381668	0.3204	0.381668	0.381668	0.1642	0.4167	0.6769	0.2632	0.4955	0.3656	0.3204	0.44	0.4074	0.381668	0.541	0.3259	0.3957	0.2821	0.8462	0.3595	0.4142	0.362	0.3
ZNF415_51669_AA	0.8597	0.8213	0.7976	0.6968	0.7976	0.6365	0.6365	0.8141	0.6864	0.857114	0.8281	0.857114	0.857114	1	0.7821	0.5347	0.857114	0.922	0.857114	0.8874	0.754	0.8401	0.857114	0.8141	0.857114	0.857114	0.857114	1	0.857114	0.857114	1	0.8751	0.754	0.8597	0.857114	0.6864	1	0.6051	0.7976	1	0.8751	0.7779	0.8751	0.7243	1	1	0.8401	0.7324	0.74
ZNF415_51691_AD	0.311	0.5696	0.5059	0.3872	0.5109	0.5306	0.4044	0.4158	0.6291	0.3963	0.48	0.4037	0.4318	0.3896	0.3102	0.6043	0.4462	0.4332	0.4293	0.4238	0.4324	0.4895	0.5301	0.4413	0.4204	0.1714	0.5752	0.4552	0.39	0.460365	0.5566	0.5334	0.5027	0.5356	0.6061	0.4499	0.3284	0.5354	0.2653	0.5173	0.4798	0.4373	0.3834	0.4459	0.4131	0.5154	0.3097	0.4484	0.1308
NDUFA3_51784_AD	0.5415	0.6392	0.39309	0.6116	0.39309	0.39309	0.39309	0.4148	1	0.39309	0.39309	0.3713	0.39309	0.403	0.1645	0.39309	0.3713	0.5415	0.1444	0.2967	0.39309	0.747	0.3918	0.8052	0.39309	0.6116	0.4406	0.4961	0.3581	0.3713	0.5083	0.3443	0.39309	0.2825	0.2825	0.8666	0.39309	1	0.7725	0.3332	0.1056	0.4526	0.6116	0.8253	0.759	0.2616	0.39309	0.3713	1
RPS9_51827_AD	0.9942	0.4738	0.3271	0.0047	0.9941	0.4766	0.0022	0.3284	0.363	0.3261	0.4594	0.3491	0.0068	0.0014	0.3856	0.0026	0.9702	0.9918	0.3288	0.1918	0.3925	0.3215	0.3051	0.0026	0.9857	0.9912	0.3911	0.0138	0.5522	0.0042	0.0051	0.2845	0.01	0.0084	0.0013	0.0173	0.9858	0.5521	0.337	0.0059	0.4236	0.0043	0.9892	0.0014	0.9774	0.2664	0.0052	0.0062	0.0069
LILRB5_51850_AA	0.6082	1	0.8566	0.9157	1	1	0.9157	1	1	0.836215	0.6293	0.9023	1	0.8129	0.7918	1	0.7857	0.8838	0.9228	0.8968	0.952	0.8594	0.8412	1	0.8348	0.7793	0.8594	0.7793	0.4745	0.7309	1	0.7548	0.6236	0.8907	0.8968	0.4873	0.7701	0.7142	0.822	0.8996	0.8377	1	0.9393	0.7652	1	0.9228	0.84	1	0.836215
LILRB4_51932_AA	0.5801	0.482132	0.1214	0.4738	0.3878	0.4583	0.5865	0.4251	0.4362	0.482132	0.5473	0.5606	0.3971	0.7074	0.482132	0.4037	0.5223	0.482132	0.3875	0.5032	0.5091	0.4085	0.482132	0.4065	0.4769	0.4699	0.482132	0.482132	0.4341	0.4666	0.4462	0.4318	0.4318	0.3462	0.5752	0.482132	0.4583	0.4583	0.532	0.525	0.5051	0.5014	0.4708	0.3626	0.4916	0.5194	0.4024	0.4755	0.5473
CCDC106_52128_AA	0.4271	0.737	0.6312	0.4391	0.5398	0.4931	0.4219	0.3591	0.4755	0.4965	0.4577	0.6404	0.335	0.7711	0.5419	0.5662	0.163	0.3785	0.4893	0.4773	0.5996	0.5831	0	0.6558	0.6364	0.4414	0.1725	0.396	0.581	0.499675	0.5136	0.7818	0.5567	0.5757	0.7442	0.5604	0.6553	0.4863	0.2279	0.3933	0.5888	0.2946	0.5169	0.3529	0.2758	0.4861	0	0.5942	0.7543
CCDC106_52131_AA	0.2709	0.2162	0.2302	0.2205	0.2107	0.221	0.1853	0.1423	0.2406	0.2897	0.1584	0.3464	0.178	0.3752	0.2308	0.2172	0.0733	0.2129	0.1953	0.2356	0.3672	0.243	0	0.4728	0.393	0.2095	0.0659	0.1991	0.3134	0	0.2495	0.2533	0.3223	0.3799	0.338	0.3283	0.5195	0.2738	0.0697	0.1671	0.2488	0.0926	0.3859	0.091	0.1183	0.2701	0	0.3218	0.4313
ZNF444_52157_AA	0.7946	0.6592	0.5801	0.8024	0.5919	0.5801	0.6592	0.6592	0.7838	0.4916	0.6503	0.518	0.5919	0.6462	0.5725	0.6864	0.722088	0.6817	0.7668	0.722088	0.8286	0.7519	0.7719	0.7206	0.518	0.7355	0.4916	0.6763	0.6683	0.7558	0.8043	0.6929	0.6975	0.6592	0.7599	0.7582	0.7326	0.6263	0.6592	0.7343	0.8764	0.7755	0.667	0.6851	0.6548	0.7946	0.8627	0.4462	0.6462
ZNF671_52334_AD	0.1002	0.0715	0.2172	0.1105	0.1462	0.144299	0.2234	0.1036	0	0.0489	0.1335	0.2445	0.0336	0.1654	0.2308	0.1997	0.1615	0.1625	0.144299	0.2356	0.2003	0.1091	0.021	0.1212	0.1821	0.0459	0.0215	0.1585	0.1978	0.2551	0.149	0.1218	0.0546	0.0781	0.144299	0.2252	0.4148	0	0	0.2158	0	0.2988	0	0.1154	0.1878	0.2044	0.1839	0	0.0407
ZNF552_52343_AD	0.4981	0.324018	0.324018	0.1169	0.1419	0.324018	0.2486	0.3554	0.4356	0.324018	0.2209	0.4981	0.159	0.4981	0.6232	0.2894	0.2785	0.3806	0.324018	0.2926	0.3732	0.0422	0.2652	0.3732	0.3512	0.2209	0.324018	0.2209	0.324018	0.2785	0.324018	0.2047	0.1553	0.1282	0.3061	0.2712	0.2161	0.3061	0.3461	0.5696	0.3667	0.2926	0.1952	0.2327	0.1553	0.3061	0	0.4426	0.8113
ZNF418_52374_AD	1	1	0.8407	0.8878	0.8771	0.7784	0.9156	0.7453	0.805	1	0.8685	0.6859	0.952	1	0.9249	0.8955	1	0.9681	0.7964	0.9557	0.936	0.9559	0.8964	0.8693	1	1	1	0.9648	0.8771	1	0.912	1	1	1	0.7913	0.9268	1	0.8639	0.923	0.8875	0.8207	0.9317	0.9257	0.8748	0.9529	0.9595	0.9325	0.8188	0.9442
ZNF606_52383_AD	0.5108	0.6705	0.7141	0.5931	0.7157	0.5986	0.5857	0.5919	0.7799	0.6722	0.746	0.4697	0.8564	0.6084	0.4469	0.8109	0.7366	0.5786	0.616045	0.1227	0.4946	0.6604	0.7885	0.6819	0.6509	0.3587	0.3587	0.8182	1	0.6391	0.5415	0.6431	0.7277	1	0.5137	0.936	0.7828	0.829	0.62	0.8234	0.528	0.4986	0.6654	0.5986	0.6266	0.5339	0.7628	0.6177	0.4939
ZNF135_52392_AA	0.3782	0.2746	0.8418	0.5156	0.7961	0.1913	0.4701	0.6583	0.2488	0.539025	0.4439	0.7615	0.7395	0.3782	0.6904	0.429	0.539025	0.3898	0.539025	0.4151	0.4599	0.7029	0.5419	0.3621	0.4701	0.539025	0.4151	0.7029	0.539025	0.539025	0.6612	0.6976	0.3621	0.7395	0.6804	0.751	0.6976	0.5419	0.3831	0.4151	0.751	0.5062	0.5356	0.4478	0.5419	0.7681	0.5686	0.6013	0.5272
ZNF135_52393_AD	0.1048	0.1151	0.5393	0.2454	0.0682	0.201939	0.18	0.2102	0.2507	0.201939	0.2379	0.18	0.0889	0.1823	0.1399	0.1838	0.201939	0.2264	0.201939	0	0.6095	0.1854	0.1277	0.3167	0.0889	0.1003	0.201939	0.0651	0.1048	0.201939	0.2006	0.1211	0.0889	0.2264	0.1767	0.2527	0.1633	0.1399	0.0752	0.201939	0.2264	0.3003	0.2635	0.1048	0.0416	0.3279	0.4766	0.2507	0.5941
ZSCAN18_52406_AD	0.1769	0.3511	0.4112	0.4495	0.1732	0.2872	0.4293	0.4429	0.2438	0.354	0.44	0.4462	0.2807	0.3653	0.4433	0.5194	0.5865	0.4293	0.330924	0.392	0.3259	0.4324	0.2692	0.2545	0.284	0.1717	0.1862	0.3495	0.4436	0.2438	0.3833	0.5371	0.3715	0.3585	0.2826	0.4462	0.5301	0.2733	0.4794	0.330924	0.2965	0.3308	0.5018	0.3006	0.1621	0.4049	0.6102	0.435	0.249
ZNF837_52438_AD	0.4624	0.3982	0.2857	0.4681	0.5047	0.5675	0.7432	0.5056	0.7741	0.4426	0.5615	0.6045	0.5887	0.6091	0.5646	0.5209	0.4099	0.5305	0.7643	0.7181	0.4321	0.3028	0.5903	0.655	0.5723	0.5723	0.3732	0.4437	0.5286	0.5294	0.5366	0.7439	0.5047	0.6397	0.5474	0.5774	0.6888	0.4809	0.3508	0.2428	0.5752	0.4477	0.5194	0.6574	0.5732	0.7354	0.5036	0.7432	0.6045
ITGB1BP1_52617_AA	0.8529	0.8237	0.6556	0.7907	0.6959	0.7142	1	0.7798	0.9474	0.4765	0.6764	0.7147	0.7057	0.6427	0.9375	0.6055	0.6657	0.8814	0.4766	0.7394	0.8738	0.3734	0.809	0.6692	0.4821	0.6891	0.5444	0.899	0.7536	0.6214	1	0.6721	0.7897	0.5722	0.6759	0.7609	0.6798	0.8026	0.5561	0.734	0.749	0.8388	0.9041	0.712	0.8363	0.8726	0.7326	0.7832	0.6957
FKBP1B_52800_AA	0.4527	0.471588	0.3692	0.5072	0.7154	0.5142	0.3249	0.6554	0.2486	0.471588	0.3876	0.5908	0.3792	0.6494	0.3982	0.5696	0.2486	0.4937	0.4624	0.5513	0.4887	0.44	0.3061	0.6093	0.5244	0.4321	0.5555	0.6028	0.4138	0.4764	0.4471	0.6232	0.3828	0.5208	0.4648	0.3461	0.5696	0.2842	0.3838	0.557	0.5166	0.4192	0.5606	0.5416	0.5982	0.3846	0.4764	0.665	0.7081
MAPRE3_52921_AD	0.5294	0.6432	0.4513	0.7591	0.6948	0.7093	0.5796	0.5315	0.4274	0.495	0.6048	0.6897	0.5742	0.5937	0.5104	0.6937	0.5804	0.4402	0.4426	0.6859	0.7258	0.7817	0.5575	0.6527	0.5835	0.5381	0.5287	0.4665	0.5911	0.6521	0.5798	0.6245	0.6006	0.7323	0.58	0.4627	0.7327	0.6168	0.465	0.6316	0.6802	0.6704	0.7605	0.6358	0.6612	0.737	0.7542	0.6383	0.6685
MPV17_52976_AA	0.279	0.1368	0.4669	0.2868	0.3455	0.5511	0.3827	0.2341	0.4061	0.1692	0.5363	0.4575	0.4684	0.422	0.6218	0.3711	0.4217	0.2826	0.4249	0.4422	0.4394	0.5336	0	0.2661	0.3212	0.103	0.3023	0.6214	0.611	0.4902	0.578	0.3502	0.6181	0.5689	0.504	0.4601	0.6742	0.3872	0.5414	0.4064	0.5597	0.4445	0.5587	0.515	0.6758	0.5192	0.7595	0.401	0.1873
LBH_53114_AD	0.6893	0.8661	0.7213	0.7306	0.732295	0.732295	0.8161	0.6704	1	1	0.6246	1	0.8331	0.649	1	0.5394	0.7689	1	0.732295	0.2699	1	0.7784	1	1	0.5116	0.732295	0.732295	0.5479	0.732295	0.732295	1	1	0.5259	0.732295	0.732295	0.4676	0.732295	1	0.6893	0.732295	1	1	0.732295	0.7586	0.732295	1	1	1	0.7473
LTBP1_53185_AA	0.6901	0.5876	0.7623	0.6338	0.5166	0.7967	0.3328	0.4827	0.2627	0.574873	0.2627	0.4711	0.3878	0.6159	0.4872	0.7539	0.5166	0.4809	0.574873	0.5241	0.6621	0.5366	0.7719	0.5704	0.5235	0.574873	0.574873	0.574873	0.4711	0.6621	0.7719	0.4711	0.5876	0.7662	0.4394	0.3792	0.5537	0.5903	0.785	0.7138	0.5248	0.4685	0.6069	0.4474	0.574873	0.5248	0.7063	0.5145	0.5799
EIF2AK2_53218_AA	0.3534	0.328	0.4889	0.3936	0.2671	0.2546	0.6398	0.3755	0.3534	0.395323	0.4127	0.7804	0.1827	0.4505	0.4505	0.2146	0.4005	0.3808	0.3129	0.327	0.3659	0.4335	0.6721	0.2907	0.1481	0.6567	0.4505	0.5774	1	0.3755	0.5374	0.6456	0.711	0.4059	0.3755	0.2715	0.2274	0.2146	0.4112	0.4889	0.3534	0.3894	0.3961	0.2581	0.711	0.3659	0.5515	0.1508	0.1582
DYNC2LI1_53400_AA	0.1337	0.1667	0.2532	0.252	0.1813	0.2538	0.1934	0.2219	0.1811	0.2673	0.1971	0.2525	0.2406	0.3267	0.3525	0.2486	0.3318	0.2456	0.4214	0.2901	0.3507	0.3101	0.1741	0.2701	0.2671	0.3214	0.2275	0.2729	0.4078	0.4139	0.366	0.283	0.2503	0.3038	0.2654	0.3985	0.3978	0.2324	0.3564	0.3838	0.2284	0.2971	0.3102	0.2155	0.4485	0.4425	0.3607	0.194	0.185
PREPL_53451_AD	0.427	0.481	0.7198	0.392	0.3071	0.4346	0.5356	0.6404	0.4107	0.4622	0.4898	0.4037	0.512717	0.512717	0.4747	0.6494	0.3924	0.4528	0.512717	0.5242	0.4182	0.7154	0.1477	0.6412	0.512717	0.512717	0.512717	0.8008	0.512717	0.8354	0.512717	0.4681	0.4803	0.512717	0.512717	0.6041	0.5968	0.5606	0.421	0.6457	0.356	0.4009	0.3739	0.5467	0.512717	0.4112	0.4246	0.3422	0.7443
BCL11A_53664_AD	0.1465	0.251863	0.0965	0.2439	0.3538	0.2068	1	0.5226	0.2603	0.0725	0.1287	0.1843	0.1725	0.1209	0.4009	0.3253	0.2891	0.1828	0.1357	0.1735	0.251863	0.1602	0.0944	0.251863	0.3229	0.125	0.1543	0.3312	0.124	0.2068	0.1287	0.2811	0.098	0.1234	0.2217	0.1127	0.2202	0.2006	0.1713	0.1364	0.251863	0.1524	0.265	0.251863	0.0792	0.3538	0.4841	1	1
PEX13_53685_AA	0.8649	0.6602	0.3636	0.2697	0.1463	0.468443	0.7619	0.4898	0.5283	0.5	0.5	0.4037	0.468443	0.5833	0.6154	0.2991	0.468443	0.6154	0.468443	0.5902	0.6154	0.3243	0.4444	0.2424	0.4444	0.2105	0.468443	0.2857	0.468443	0.468443	0.6429	0.6316	0.6154	0.3077	0.7059	0.4898	0.2105	0.466	0.3796	0.3902	0.375	0.7619	0.4444	0.4737	0	0.6154	0.5902	0.4898	0.3478
VPS54_53764_AA	0.7029	0.458	0.713	0.5489	0.3364	0.6395	0.4756	0.3011	0.3782	0.4599	0.3269	0.4151	0.4599	0.4409	0.395	0.5698	0.4151	0.5394	0.431208	0.5507	0.5578	0.431208	0.3716	0.2332	0.3557	0.431208	0.431208	0.2439	0.431208	0.431208	0.2051	0.2211	0.3073	0.4151	0.431208	0.5686	0.8098	0.5867	0.4771	0.3831	0.4645	0.4799	0.4151	0.5334	0.431208	0.6186	0.4939	0.3504	0.4151
CEP68_53782_AD	1	1	1	0.5306	1	0.93369	1	1	1	0.93369	1	1	1	1	0.93369	1	1	1	1	1	1	1	1	1	1	0.2663	1	1	0.93369	1	1	1	1	1	1	1	1	1	1	1	1	1	1	1	0.7434	1	1	1	1
ELMOD3_54211_AD	0.1277	0.1874	0.1899	0.1187	0.2233	0.1097	0.0629	0.229	0.4055	0.189349	0.1597	0.1024	0.0743	0.1825	0.3298	0.3023	0.2079	0.1587	0.2891	0.1469	0.2405	0.0908	0.189349	0.0962	0.2495	0.0935	0.189349	0.5169	0.0336	0.5881	0.1677	0.1128	0.2268	0.1643	0.125	0.3545	0.1105	0.4331	0.0746	0.0493	0.1777	0.1876	0.1743	0.0985	0.1435	0.3008	0.3383	0.2277	0.4696
ELMOD3_54233_AA	0.6655	0.2931	0.596	0.5901	0.7027	0.553	0.3375	0.4999	0.4802	0.4006	0.5071	0.8397	0.4212	0.6698	0.7787	0.6462	0.68	0.4769	0.744	0.7669	0.3856	0.4699	0.432	0.5483	0.6533	0.4796	0.3894	0.6575	0.6959	0.4906	0.6042	0.8339	0.567	1	0.3869	0.5186	0.8827	0.368	0.4118	0.5561	0.6606	0.6885	0.8288	0.8422	0.6832	0.8198	0.843	0.7154	0.5395
ELMOD3_54247_AA	0.3934	0.2369	0.8108	0.4449	0.3153	0.6497	0.352	0.3362	0.6886	0.6452	0.8714	0.7735	0.4957	0.6075	0.5586	0.6822	0.4944	0.3353	0.476954	0.6175	0.3353	0.5382	0.476954	0.603	0.6239	0.2055	0.4694	0.4067	0.476954	0.6892	0.4842	0.4094	0.5539	0.6522	0.4328	0.7254	0.6856	0.2237	0.2369	1	0.7207	0.5521	0.7244	0.5207	0.7129	0.5795	0.7926	1	0.328
ELMOD3_54249_AA	0.3789	1	1	0.243	0.2861	0.4444	0.1431	0.464	1	0.2104	0.5684	0.7634	0.5887	0.643	1	0.7822	0.1578	0.3072	0.639031	0.7713	1	0.6744	0.639031	0.4695	1	0.2556	1	1	0.639031	0.5565	0.8355	1	1	1	0.3947	0.7839	1	0.3007	0.1545	1	0.5792	0.8359	0.6353	0.6772	1	0.7852	0.7359	0.6375	0.3378
ELMOD3_54251_AA	0.4623	1	1	0.2861	0.5952	0.2571	0.2513	0.654	1	0.0962	0.2433	0.6675	0.7279	0.6078	1	0.6585	0.1915	0.519	0.688182	0.6244	1	0.7035	1	0.5162	1	0.5887	1	1	0.6832	0.5958	0.8646	1	1	1	0.6063	0.635	1	0.6766	0.4177	0.688182	0.4535	0.8135	0.4853	0.6424	1	0.7483	0.5367	0.688182	0.5321
ST3GAL5_54387_AA	0.1424	0.1631	0.2388	0.144	0.1452	0.0916	0.1541	0.128	0.1802	0.1085	0.1835	0.1984	0.1937	0.1988	0.1839	0.1285	0.2174	0.0894	0.0767	0.1723	0.106	0.2473	0.1424	0.1271	0.1357	0.1598	0.1214	0.264	0.1211	0.213	0.1779	0.1661	0.1577	0.1625	0.1345	0.1292	0.2493	0.1516	0.1008	0.3605	0.1589	0.196	0.204	0.1342	0.6073	0.2088	0.2588	0.1186	0.1208
MRPL35_54420_AA	0.2868	0.2171	0.1885	0.4159	0.2724	0.0986	0.0844	0.4484	0	0.2497	0.196261	0.2802	0.0566	0.196261	0.2445	0.1565	0.3795	0.1286	0	0.0769	0.1266	0.3409	0.1703	0.1472	0.138	0.3056	0.1542	0.1921	0.067	0.1159	0.4176	0.0556	0.1662	0.1582	0.2829	0.4304	0.2925	0.2616	0.0733	0	0.2273	0.157	0.2889	0.1505	0.1636	0.196261	0.222	0.196261	0.1557
ZNF514_54488_AD	1	0.392	0.3071	0.5883	0.2505	0.3495	0.4718	0.2822	0.6638	0.4293	0.5752	0.2947	0.2313	0.4061	0.2005	0.5869	1	0.4991	0.408252	0.2313	0.7899	0.4003	0.6741	0.2733	0.5593	0.408252	0.408252	0.477	0.408252	1	0.1714	0.48	0.6007	0.2244	0.2414	0.5159	0.334	0.392	0.5301	0.3874	0.4037	0.3767	0.5007	0.2425	0.2666	0.4007	0.4018	0.4135	0.3607
PROM2_54497_AA	0.6018	0.5205	0.7173	0.4729	0.6942	1	0.563	0.5869	0.6079	0.6595	0.6	0.422	0.6396	0.5797	0.7229	0.5003	0.560534	0.5424	0.5427	0.762	0.6148	0.365	0.4426	0.3811	0.8134	0.4783	0.3863	0.3926	0.6067	0.3121	0.5847	0.5778	0.6131	0.408	0.6188	0.5427	0.6731	0.5142	0.4551	0.5113	0.7622	0.7398	0.6374	0.3529	0.4045	0.593	0.5091	0.6952	0.576
TMEM127_54518_AA	0.5368	0.563	0.6132	0.5059	0.6937	0.7603	0.6719	0.7985	0.5692	0.4422	0.6057	0.4754	0.8375	0.4805	0.4422	0.5621	0.5996	0.704	0.628413	0.628413	0.7603	0.8087	0.4422	0.7151	0.7226	0.8473	0.4422	0.6022	0.628413	0.6789	0.6647	0.6408	0.6132	0.704	0.6356	0.5432	0.5904	0.5811	0.7985	0.4046	0.5139	0.704	0.5487	0.6733	0.628413	0.6408	0.6022	0.5996	0.699
INPP4A_54629_AD	0.8411	0.8788	0.6789	0.7234	0.8726	0.8608	0.7745	0.8946	0.6438	1	0.8285	0.7203	1	0.6594	0.8639	0.8755	0.8141	0.7897	0.8656	0.8532	0.6628	0.6211	0.6635	0.8436	0.8709	0.8681	1	0.6479	1	0.9262	0.5842	0.8663	0.7541	0.8636	0.7867	0.6136	0.6881	0.2957	0.442	0.5459	0.8586	0.7151	0.7072	0.8351	1	0.5756	0.7764	0.9173	0.9872
TSGA10_54665_AA	0.64	0.5882	0.4	0.4	0.624243	0.624243	0.64	0.6316	0.5714	0.624243	0.6538	0.7273	0.4	0.4906	0.5862	0.7429	0.624243	0.5714	0.624243	0.625	0.5161	0.7619	0.624243	0.7429	0.5455	0.4615	0.624243	0.4444	0.624243	0.624243	0.8696	0.6538	0.624243	1	0.624243	0.5714	0.3478	0.6087	0.6809	0.624243	1	0.5333	0.5909	0.8235	0.5385	0.75	0.6667	0.624243	0.5714
REV1_54713_AA	0.3259	0.7074	0.6171	0.5632	0.3259	0.534205	0.6769	0.381	0.4916	0.534205	0.3672	0.4362	0.525	0.6989	0.4329	0.4916	0.4916	0.5401	0.534205	0.5991	0.5752	0.4699	0.534205	0.6445	0.5752	0.534205	0.534205	0.4532	0.534205	0.534205	0.4916	0.5345	0.4916	0.5919	0.5752	0.4755	0.8788	0.6803	0.5301	0.3559	0.4653	0.6237	0.6745	0.4622	0.534205	0.5505	0.5401	0.45	0.5473
FHL2_54831_AD	0.6874	0.737245	0.737245	0.8426	0.737245	0.7567	0.6271	0.8029	0.4135	1	0.7404	0.8421	0.9298	0.8538	0.8266	0.6244	0.7348	0.6259	0.5789	0.5814	0.8215	1	0.6177	0.6163	0.6848	0.5277	0.737245	0.8074	0.7534	0.8848	0.3404	0.7646	0.6764	0.8578	1	0.7195	0.6564	0.7228	0.8183	0.872	0.8002	0.7142	0.3879	0.737245	0.737245	0.77	0.8053	1	0.737245
FHL2_54836_AD	0.5597	0.646307	0.646307	0.7166	0.7038	0.4928	0.47	0.6197	0.5907	0.646307	0.6529	0.4706	0.3374	0.6798	0.7831	0.6091	0.5549	0.5591	0.6471	0.5867	0.7377	0.4667	0.6364	0.6314	0.6124	0.5277	0.4727	0.5444	0.7534	0.7422	0.6265	0.6863	0.6937	0.4369	0.6593	0.6999	0.6384	0.6506	0.6216	0.4307	0.6004	0.319	0.5809	0.8176	0.2188	0.6378	0.7544	0.646307	0.646307
SULT1C2_54877_AA	0.2529	0.1688	0.2683	0.1053	0.2361	0.215668	0.1715	0.1906	0.158	0.1621	0.2262	0.1841	0.1014	0.2223	0.22	0.311	0.1621	0.1674	0.2249	0.1621	0.4037	0.3023	0.0724	0.1777	0.1096	0.1192	0.2249	0.421	0.1688	0.3165	0.3513	0.293	0.2226	0.3063	0.1277	0.3463	0.5038	0.1283	0.2463	0.2529	0.1869	0.4605	0.3241	0.2176	0.5752	0.4037	0.4895	0.0362	0.1772
NPHP1_54934_AD	0.4221	0.3494	0.7487	0.602	0.1284	0.446446	0.3089	0.205	0.4719	0.446446	0.6608	0.4269	0.3548	0.6962	0.3307	0.2732	0.1736	0.3756	0.446446	0.716	0.205	0.3671	0.5576	0.541	0.446446	0.4451	0.4934	0.3793	0.321	0.2558	0.7687	0.6074	0.4783	0.4074	0.2478	0.5077	0.3972	0	0.2183	0.4495	0.4719	0	0.6322	0.446446	1	0.3402	0.446446	0.5077	0.205
DBI_55115_AD	0.2313	0.2884	0.1776	0.3739	0.1677	0.1239	0.2235	0.3638	0.2612	0.1852	0	0.2344	0.2191	0.1518	0.2694	0.1564	0.2667	0.045	0.0415	0.1463	0.1942	0.1386	0.1619	0.2795	0.2143	0.1757	0.3018	0.0892	0.1263	0.3669	0.1561	0.2507	0.227	0.2148	0.1572	0.1451	0.2127	0.1828	0.2554	0.2594	0.1645	0.3063	0.1608	0.2688	0.1782	0.1567	0.3125	0.4303	0.2326
TMEM177_55137_AD	0.2586	0.1558	0.1376	0.381	0.1186	0.2407	0.1333	0.2565	0.1269	0.2419	0.1795	0.2041	0.1429	0.1865	0.2988	0.0995	0.1049	0.376	0.0694	0.0824	0.1363	0.0885	0.0277	0.1278	0.1165	0.1784	0.0597	0.1308	0.1829	0.339	0.3237	0.0995	0.1951	0.381	0.2041	0.0727	0.099	0.0787	0.1802	0.2909	0.6723	0.1505	0.2909	0.224277	0.2697	0.3349	0.4109	0.1522	0.1784
TMEM177_55138_AD	0.247	0.2568	0.307	0.3167	0.128	0.3264	0.1256	0.3669	0.1942	0.6025	0.201	0.283	0.1416	0.1549	0.2242	0.0712	0.0924	0.2809	0.1702	0.0716	0.1343	0.0836	0.0237	0.088	0.1549	0.3341	0.1549	0.0939	0.1667	0.2874	0.2688	0.0966	0.1296	0.1279	0.2005	0.0801	0.1274	0.1796	0.084	0.2547	0.2946	0.1295	0.1737	0	0.2481	0.565	0.3534	0.3202	0.4889
TMEM177_55139_AD	0.4777	0.6431	0.7402	0.5126	0.516	0.5777	0.5134	0.6299	0.6142	0.8402	0.5158	0.6409	0.5184	0.4444	0.4351	0.4849	0.4962	0.3978	0.6961	0.4626	0.5587	0.5161	0.485	0.4747	0.5537	0.708	0.7402	0.4581	0.5821	0.5032	0.442	0.5392	0.4839	0.321	0.5479	0.5855	0.6315	0.7145	0.4508	0.4825	0.3299	0.4766	0.4344	0.4248	0.5088	0.8025	0.5158	0.7255	0.8404
CCDC74B_55281_AA	0.3803	0.5384	0.2892	0.4784	0.431961	0.2738	0.5318	0.4796	0.7247	0.431961	0.4723	0.6823	0.4708	0.6716	0.3476	0.6686	0.2301	0.6185	0.4675	0.373	0.4172	0.4754	0.5893	0.3675	0.8419	0.5882	0.431961	0.4361	0.436	0.3201	0.5822	0.3756	0.5952	0.431961	0.6936	0.3831	0.2574	0.4753	0.7152	0.341	0.185	0.6184	0.4567	0.2776	0.1988	0.5331	0.7011	0.6424	0.431961
CCDC74B_55282_AA	0.213997	0.1603	0.1541	0.2094	0.2731	0	0.213997	0	0.4996	0.8406	0.1544	0.213997	0.4449	0.3518	0.0955	0.213997	0.213997	0.1903	0.2812	0.2481	0.5312	0.2338	0	0.1834	0.213997	0	0.5849	0.3075	0.3628	0.3092	0.2114	0.2557	0.213997	0.213997	0.5484	0.6064	0.1603	0.3143	0.3192	0.1774	0.1295	0.2934	0.213997	0.1245	0.1951	0.3799	0.213997	0.2451	0.213997
CCDC74B_55284_AD	0.236225	0.3123	0.2036	0.2029	0.2914	0.3395	0.1205	0.5523	0.3459	0.1051	0.1301	0.1545	0.3011	0.3345	0.2517	0.1205	0.2475	0.3484	0.2914	0.2914	0.236225	0.1903	0.3587	0.4022	0.2914	0.523	0.236225	0.1285	0.236225	0.4067	0.2517	0.1498	0.2646	0.236225	0.2423	0.2152	0.3612	0.7873	0.2423	0.2701	0.1476	0.1955	0.2045	0.2914	0.3541	0.2721	0.1205	0.076	0.0932
CCDC74A_55390_AA	0.5572	0.6554	0.7831	0.7588	0.4097	0.5347	0.5982	0.7662	0.8925	0.5001	0.4067	0.5085	0.4173	0.6879	0.4988	0.488	0.7332	0.6262	0.7719	0.647	0.6243	0.5446	0.6493	0.8727	0.6502	0.6926	0.4956	0.735	0.6691	0.798	0.7511	0.7216	0.6975	0.4007	0.5826	0.5119	0.6118	0.8623	0.6002	0.666	0.5919	0.6864	0.633336	0.7682	0.6144	0.5764	0.5162	0.6284	0.8132
CCNT2_55408_AD	0.3205	0.2304	0.4284	0.1716	0.4346	0.2608	0.4161	0.2726	0.3063	0.1957	0.2853	0.4932	0.3416	0.3298	0.2047	0.308	0.4237	0.4222	0.374136	0.4149	0.3071	0.4661	0.4127	0.2068	0.5692	0.4064	0.374136	0.4308	0.374136	0.4714	0.4932	0.3679	0.2688	0.6975	0.4772	0.6186	0.5093	0.2733	0.3509	0.5432	0.381	0.4494	0.3912	0.3071	0.5316	0.6476	0.4478	0.364	0.2094
R3HDM1_55442_AA	0.6745	0.5517	0.7437	0.5801	0.4583	0.4037	0.525	0.5134	0.6929	0.626617	0.7074	0.5371	0.6989	0.5473	0.4916	0.6967	0.626617	0.7154	0.626617	0.6423	0.7267	0.6967	0.6394	0.5542	0.5473	0.626617	0.626617	1	0.626617	0.626617	0.4362	0.8788	0.5919	0.6592	0.626617	0.6007	0.4916	0.7437	0.7174	0.3672	0.4622	0.6286	0.7437	0.6929	0.626617	0.5301	0.5632	0.5752	0.5752
MBD5_55537_AD	0.3913	0.4693	0.5237	0.7643	0.2884	0.4209	0.5579	0.4127	0.5571	0.5016	0.5184	0.4209	0.3375	0.4594	0.4157	0.5704	0.6721	0.5911	1	0.5248	0.7674	0.5328	0.3023	0.5647	0.5016	0.7512	0.2069	0.7512	0.2297	0.4015	0.4271	0.5985	0.5177	0.54	0.4843	0.7086	0.4873	0.6033	0.4902	0.4146	0.7365	0.5516	0.7285	0.5647	0.309	0.613	0.4969	0.3651	0.5763
WDSUB1_55695_AD	0.1587	0.3402	0.3116	0.45	0.3723	0.4063	0.418	0.4945	0.2374	0.6088	0.4003	0.3729	0.2818	0.2326	0.201	0.3954	0.4143	0.2739	0.341602	0.1444	0.2071	0.4237	0.2336	0.4908	0.2969	0.3137	0.4344	0.1908	0.5734	0.0613	0.2089	0.4157	0.3457	0.4976	0.5781	0.2964	0.2643	0.4591	0.2616	0.2088	0.4609	0.4615	0.3579	0.3998	0.5859	0.4391	0.5719	0.4233	0.3397
PPIG_55876_AD	0.0717	0	0.069	0	0.0933	0.4356	0.0621	1	0	0.206688	0.0582	0.206688	1	0.0717	0.1038	0	0.206688	0.1247	0.206688	0.0621	0	0.0888	0	0.6494	0.0717	0.2578	0.206688	0.0582	0.206688	0.3508	1	0.5264	0.0933	0	0	0.0665	0.0547	0.6346	0.6136	0.4256	0	0.0489	0.5436	0.0372	0.2842	0	0.0344	0.0489	0.0933
HNRNPA3_56126_AD	0.5605	0.707	0.5989	0.6708	0.5399	0.756	0.6788	0.6885	0.5118	0.4533	0.6625	0.5128	0.5626	0.58	0.6006	0.7661	0.5685	0.6584	0.5832	0.4638	0.4747	0.6838	0.6859	0.5477	0.4543	0.5441	0.5049	0.7908	0.7107	0.6563	0.5553	0.6663	0.6615	0.5082	0.6442	0.7844	0.6759	0.7534	0.6277	0.5714	0.6727	0.6715	0.6418	0.5199	0.6997	0.651	0.6579	0.6529	0.6892
FKBP7_56167_AA	0.7326	0.7946	0.767366	0.957	0.6171	0.767366	0.8713	0.7437	0.8969	0.6851	0.7437	1	0.6989	0.8855	0.9063	0.7074	0.9063	0.7206	0.767366	0.7822	0.853	0.7875	0.7343	0.5542	0.8186	0.6769	0.8024	0.6745	0.6592	0.8855	1	0.7074	0.6851	0.7437	0.6885	0.8043	0.7719	0.7074	0.7003	0.7231	0.8627	0.7946	0.7267	0.7206	0.9603	0.8131	0.6592	0.7719	0.8131
WDR75_56504_AA	0.0263	0.0174	0.0325	0.0158	0.0525	0.0172	0.0165	0.0378	0.0318	0.048	0.0229	0.1414	0.048	0.057	0.0797	0.0325	0.0246	0.0204	0.0659	0.0529	0.0253	0.0819	0.0258	0.0355	0.0935	0.0364	0.0545	0.1313	0.0705234	0.2092	0.0898	0.0587	0.0258	0.0768	0.0519	0.0994	0.259	0.0555	0.0335	0.1367	0.0325	0.1295	0.0732	0.0378	0.4386	0.0694	0.1313	0.0232	0.0296
NABP1_56613_AA	1	0.709766	1	0.7739	0.7781	0.7322	0.6254	0.5005	1	0.709766	0.2504	0.6543	0.6005	0.3798	1	0.7958	0.6671	1	0.6846	0.8398	0.556	0.8539	0.709766	0.9144	0.7757	0.709766	0.8911	1	0.709766	0.7934	1	0.6005	1	0.8464	0.7781	0.709766	0.8212	0.4198	0.3621	0.6671	0.8128	0.7112	1	1	1	0.7696	0.9261	0.6979	0.5614
NABP1_56617_AD	0.7612	0.847596	0.7994	0.738	0.6745	0.8051	1	0.8777	1	0.847596	1	0.8673	0.9348	1	0.847596	0.9256	0.8942	1	1	0.789	0.9035	1	0.847596	0.8673	0.8488	0.7305	0.7468	1	1	0.817	1	1	0.9107	0.8528	0.8714	1	0.8873	0.8644	1	1	0.8752	0.7498	0.8247	0.7881	1	0.8614	1	0.8115	0.7762
SPATS2L_56741_AD	1	0.8781	1	0.7801	0.7996	0.746	0.8256	0.9172	0.8829	0.47	0.859	1	0.7563	1	0.9514	1	0.8389	0.7727	0.891038	0.9205	0.9451	0.809	0.8919	0.9239	1	1	1	1	1	0.836	0.7268	0.9242	0.8025	0.7348	0.6799	1	0.8508	0.6854	0.9366	0.9172	1	0.9447	0.8878	1	1	1	0.6869	1	1
KCTD18_56745_AD	0.4542	0.4896	0.2987	0.3592	0.4173	0.3527	0.2855	0.3592	0.4524	0.1439	0.3771	0.3461	0.2301	0.3639	0.42	0.3494	0.3494	0.3592	0.370457	0.5559	0.3505	0.3245	0.2246	0.4434	0.4537	0.3778	0.296	0.3255	0.3096	0.3905	0.3954	0.3294	0.4774	0.4474	0.4277	0.3232	0.4277	0.4459	0.3456	0.2411	0.4452	0.4436	0.3068	0.308	0.2189	0.3954	0.441	0.3817	0.3203
PPIL3_56768_AD	0.3668	0.6913	0.7603	0.5694	0.5662	0.6426	0.5142	0.5237	0.5623	0.5073	0.5118	0.6088	0.5867	0.7171	0.3545	0.5848	0.4527	0.5667	0.4929	0.639	0.5728	0.6343	0.6401	0.5699	0.5908	0.5346	0.4528	0.6214	0.5789	0.5369	0.621	0.6642	0.6492	0.6837	0.6309	0.9154	0.6871	0.621	0.4913	0.6728	0.6884	0.7451	0.6978	0.5894	0.6458	0.5891	0.7645	0.6856	0.5101
NIF3L1_56774_AA	0.8567	0.5692	0.7629	0.688	0.8328	0.9452	0.541	0.7623	0.695	0.7169	0.5524	0.8995	0.5392	1	1	0.8141	0.6171	0.8117	0.8228	0.5824	0.738871	0.6943	0.738871	0.4777	0.7943	0.5648	0.8755	0.738871	1	0.718	0.8436	0.717	0.9212	0.7194	0.8355	0.5544	0.7309	0.8793	0.5164	0.511	0.8212	0.7389	0.7402	0.8229	1	0.7906	0.7104	0.5289	0.8979
NIF3L1_56777_AD	0.8582	0.500269	0.6725	0.4225	0.7394	0.8345	0.3794	0.7408	0.4117	0.500269	0.3421	0.6233	0.3272	0.6383	0.493	0.6021	0.2388	0.4156	0.7945	0.3678	0.500269	0.637	0.500269	0.2504	0.7869	0.500269	0.7793	0	0.6941	0.5221	0.7055	0.4748	0.5842	0.5523	0.4138	0.3568	0.5435	0.4637	0.2903	0.2703	0.7143	0.2978	0.3161	0.5863	0.8759	0.698	0.4387	0.2744	0.5844
NDUFB3_56780_AA	1	1	1	0.5811	1	0.826081	0.8928	1	1	0.826081	0.91	1	1	0.7811	0.7204	0.6408	0.91	1	0.856	0.8063	0.826081	0.7483	0.7944	0.826081	0.91	0.7811	0.8426	0.826081	1	0.91	0.5432	0.8348	0.704	0.826081	1	0.7235	0.6408	0.7483	0.7811	0.8854	1	1	0.704	1	0.704	0.8854	0.6856	0.826081	0.826081
STRADB_56840_AA	0.0531	0.1078	0.2723	0.1351	0.1477	0.0453	0.2075	0.1933	0.033	0.1284	0.0387	0.1099	0.2003	0.2784	0.2364	0.0833	0.064	0.0849	0.125	0.145	0.074	0.1125	0.0686	0.1653	0.1337	0.156	0.1422	0.2821	0.1358	0	0.1642	0.2245	0.2048	0.1403	0.1775	0.0894	0.3049	0.2252	0.21	0.2775	0.0779	0.2572	0.3315	0.1411	0.72	0.2588	0.3298	0.0811	0.0901
EEF1B2_57137_AA	0.318518	0.318518	0.4378	0.3314	0.226	0.3936	0.2375	0.2375	0.318518	0.318518	0.4933	0.476	0.5388	0.4831	0.318518	0.5388	0.318518	0.5094	0.2207	0.4378	0.4378	0.3687	0.318518	0.302	0.5648	0.3417	0.476	0.3417	0.4003	0.318518	0.4831	0.245	0.2305	0.4933	0.4121	0.2305	0.5768	0.4378	0.245	0.5388	0.1986	0.4593	0.2954	0.324	0.4197	0.308	0.5216	0.2061	0
EEF1B2_57144_AA	0.4443	0.4137	0.4313	0.5568	0.5352	0.4576	0.472	0.5411	0.278	0.2202	0.3866	0.5439	0.4367	0.3754	0.3243	0.6231	0.7273	0.2214	0.7643	0.721	0.6613	0.602	0.4416	0.3263	0.619	0.2841	0.4656	0.6255	0.436	0.5885	0.3564	0.486	0.5045	0.673	0.5297	0.2469	0.6023	0.3195	0.6029	0.4359	0.6493	0.4496	0.398	0.6412	0.6065	0.6107	0.3434	0.4887	0.6401
MDH1B_57152_AA	0.3035	0.4263	0.6614	0.3035	1	0.3907	0.6205	0.572421	0.1344	0.572421	0.6579	0.7645	0.7645	0.5872	0.8313	0.5024	0.4903	0.4593	0.5141	0.558	0.6839	0.3309	0.5824	1	0.572421	0.7576	0.8665	0.6921	0.5803	0.3907	0.8034	0.4914	0.6205	0.7063	0.8621	0.6317	0.2778	0.457	0.4039	0.6898	0.4072	0.8242	0.8707	0.9272	0.2019	0.7315	0.572421	0.6273	1
FASTKD2_57159_AD	0.2042	0.3977	0.3222	0.2753	0.615	0.8494	0.4708	0.4099	0.0835	0.5646	0.2731	0.3406	0.2303	0.3838	0.2376	0.311	0.3572	0.3466	0.36538	0.3987	0.3995	0.3499	0.4476	0.3521	0.4217	0.3466	0.7955	0.3975	0.36538	0.4306	0.3823	0.2546	0.5052	0.4476	0.2984	0.2033	0.405	0.4706	0.4808	0.1956	0.2026	0.3366	0.3149	0.2402	0.36538	0.5949	0.3727	0.311	0.3749
METTL21A_57196_AD	0.7238	0.6363	0.4343	0.5188	0.4243	0.6086	0.6835	0.5007	0.8287	0.7009	0.7758	0.4073	0.6261	0.539	0.454	0.4757	0.4935	0.5649	0.5624	0.6349	0.5102	0.4137	0.7656	0.4554	0.5657	0.3065	0.2322	0.4019	0.5914	0.5069	0.5624	0.5588	0.3525	0.3684	0.4508	0.6862	0.3769	0.5709	0.4137	0.3078	0.3869	0.4551	0.522	0.3666	0.3221	0.5433	0.3273	0.5701	0.4222
LANCL1_57277_AD	0.6094	0.7406	1	0.6649	0.6494	1	0.7307	0.7226	0.6165	0.664885	0.5856	0.4332	0.7875	0.7306	0.6087	0.6822	0.5487	0.586	0.664885	0.6292	0.6136	0.6696	0.7643	0.5103	0.7572	0.8224	0.664885	0.6008	0.664885	0.7765	0.6008	0.8687	0.664885	0.6758	1	0.7059	0.5785	0.8257	0.4516	0.715	0.6463	0.9011	0.7461	0.7053	0.664885	0.8724	0.6044	0.7563	0.6774
IKZF2_57303_AD	0.6901	0.6044	0.614	0.5844	0.5146	0.7261	0.5768	0.8207	1	0.723568	0.8536	0.723568	0.8536	0.7556	0.7751	0.7092	0.8813	0.799	0.723568	0.737	0.6327	0.4503	0.723568	0.6795	0.723568	0.723568	0.723568	0.8413	0.723568	0.723568	1	0.6267	0.7261	0.8092	0.8092	0.614	0.5573	0.8212	0.8536	0.6967	0.8536	0.8413	0.6123	0.7303	0.723568	0.7249	0.7156	0.7058	0.5768
BCS1L_57519_AD	0.7195	0.5595	0.9011	0.8327	1	0.826	0.9033	0.9306	0.8193	0.8603	0.9358	0.927	1	0.945	0.9315	0.8535	0.8523	0.9178	0.8041	0.8895	0.6929	0.9059	1	0.868	0.7908	0.7496	0.8223	0.9016	0.7127	0.8889	0.9527	0.8471	0.7692	1	0.9455	0.9675	0.8603	0.822	0.7862	0.9185	0.7261	0.9663	0.9673	0.9509	0.9452	0.9523	1	0.9106	1
BCS1L_57522_AD	0.7037	0.867724	0.8668	0.6406	0.8773	1	0.8734	0.901	1	0.5025	1	0.7434	0.8867	1	0.8822	0.4959	1	1	0.867724	0.8293	0.6821	0.8693	0.867724	1	0.7972	0.6373	0.6208	0.9543	0.2563	0.8245	0.9157	0.9191	0.784	0.7745	1	0.8921	1	0.6876	0.6767	0.9077	0.8263	0.8579	0.911	0.9327	1	0.9667	0.9553	0.8281	0.5678
BCS1L_57544_AD	0.1845	0.0334	0.5933	0.0877	0.2898	0.2008	0.2425	0.2547	0.2649	0.1777	0.5463	0.4352	0.3174	0.2988	0.2959	0.1016	0.1689	0.3361	0.0711	0.5685	0.0963	0.4477	0.0177	0.3614	0.4103	0.1833	0.1662	0.5454	0.0465	0.3834	0.4931	0.3337	0.1889	0.4231	0.3389	0.4191	0.5269	0.2241	0.0442	0.3265	0.1538	0.5355	0.5461	0.4694	0.5987	0.6202	0.5834	0.2712	0.3082
GMPPA_57715_AD	0.1697	0.3251	0.3898	0.2862	0.3782	0.4642	0.3423	0.2974	0.323	0.1283	0.2972	0.2878	0.1962	0.207	0.2367	0.4054	0.1702	0.2887	0.324	0.4223	0.2044	0.4171	0.225	0.3928	0.5977	0.5111	0.4145	0.1958	0.276	0.2642	0.293	0.3334	0.3251	0.4008	0.4313	0.2964	0.2854	0.4107	0.3991	0.2993	0.3708	0.2981	0.3348	0.4311	0.321253	0.414	0.3313	0.1732	0.3439
ANKMY1_58265_AD	1	1	0.869805	0.8431	1	0.6764	1	1	0.7288	0.869805	1	1	1	0.6764	0.6417	1	0.869805	1	0.869805	1	0.6268	0.869805	1	1	0.7818	1	0.869805	1	1	0.4018	0.869805	0.8666	0.869805	0.869805	1	0.9059	1	1	0.6417	1	1	1	0.869805	0.869805	1	1	0.6105	0.5404	1
PPP1R7_58339_AD	0.3288	0.312716	0.1302	0.2926	0.0646	1	0.0513	0.0779	0.312716	0.0326	0.1104	0.076	0.4336	0.0344	0.312716	0.2669	0.1755	0.1448	0.5003	0.3518	0.0926	0.0888	0.1963	0.1618	0.3114	0.0683	0.4247	0.1945	0.1815	0.6396	0.0671	0.0785	0.1013	0.2083	0.3343	0.1528	0.1239	0.0454	0.0482	0.0717	0.3192	0.0552	0.1482	0.6489	0.1384	0.3506	0.0778	0.3829	0.312716
ATG4B_58397_AD	0.802412	0.6505	0.8088	0.7563	0.8943	0.7383	0.802412	0.7174	0.5038	0.802412	0.9167	0.7857	0.8427	0.8988	0.802412	0.8713	0.802412	0.9442	0.792	0.6929	0.8556	0.9654	0.6638	0.5851	0.8295	0.8274	0.5038	0.9511	0.5851	0.802412	0.8088	0.7174	0.679	0.6286	0.6701	1	0.8354	0.8943	0.7174	0.8427	0.802412	0.9195	0.8839	0.927	0.8966	1	0.8779	0.802412	0.802412
NSFL1C_58503_AA	0.0549	0.2691	0.3558	0.0225	0.163229	0.163229	0.163229	0.0952	0.3152	0.163229	0.2962	0.05	0.1181	0.1971	0.5249	0.1809	0.163229	0.1018	0.163229	0.1738	0.1555	0.1045	0.0646	0.1555	0.1555	0.163229	0.163229	0.3401	0	0.163229	0.1871	0.2691	0.1363	0.1871	0.0578	0.2466	0.3472	0.1655	0.1181	0.1284	0.163229	0.1871	0.1684	0.2252	0.1387	0.178	0.1363	0.163229	0.163229
TMEM230_58639_AD	0.2865	0.2046	0.4204	0.3035	0.0916	0.3759	0.3595	0.2528	0.1976	0.426	0.5082	0.3609	0.3134	0.3945	0.2455	0.3151	0.4273	0.4461	0.306906	0.3057	0.1774	0.3207	0.3629	0.3748	0.3146	0.0859	0.306906	0.3904	0.306906	0.3241	0.2771	0.3183	0.3113	0.2111	0.2462	0.184	0.2713	0.0942	0.2796	0.215	0.2722	0.3117	0.4407	0.3164	0.306906	0.6071	0.2764	0.2099	0.6173
BTBD3_58698_AA	0.6633	0.3612	0.867	0.4216	0.4263	0.7416	0.3329	0.4757	0.8103	0.7416	0.4685	0.4343	0.7254	0.8121	0.6154	0.5869	0.6307	0.5424	0.529436	0.4148	0.5774	0.5317	0.6338	0.438	0.44	0.529436	0.529436	0.5239	0.529436	1	0.5043	0.5841	0.302	0.4621	1	0.5291	0.6235	0.3327	0.6111	0.7271	0.4369	0.7836	0.6336	0.3428	1	0.6271	0.6128	0.2686	0.5159
NDUFAF5_58709_AA	0.098	0.2588	0.3284	0.1401	0.5116	0.0924	0.4674	0.234	0.324	0.0924	0.3374	0.1888	0.1785	0.2136	0.2588	0.5406	0.1043	0.4873	0.1114	0.2772	0.083	0.4139	0.2047	0.1533	0.6419	0.2136	0.2005	0.4044	0.6506	0.295746	0.4	0.3353	0.1766	0.3177	0.3721	0.2785	0.2703	0.2136	0.4276	0.234	0.1964	0.352	0.2418	0.1785	0.3438	0.2136	0.2895	0.2136	0.4255
CSRP2BP_58756_AA	0.6171	0.6445	0.6769	0.5154	0.4362	0.6074	0.6592	0.5449	0.5801	0.592619	0.4773	0.392	0.6218	0.6712	0.6532	0.4794	0.6803	0.2087	0.592619	0.6496	0.5919	0.5345	0.2438	0.6967	0.3259	0.5919	0.7946	0.2602	0.7946	0.592619	0.6592	0.598	0.6885	0.3259	0.7326	0.6769	0.8024	0.7632	0.4266	0.592619	0.6592	0.6423	0.6031	0.6031	0.592619	0.8073	0.6885	0.6286	0.7119
ZNF133_58760_AA	0.8073	0.7437	0.6171	0.8417	0.7946	0.6111	0.4362	0.5434	0.7267	0.678338	0.8354	0.6929	0.4678	0.6745	0.7111	0.757	0.8713	0.7632	0.6803	0.7343	0.678338	0.6592	0.392	0.8186	0.7822	0.5708	0.6423	0.7946	0.8417	0.7206	0.7668	0.6207	0.8376	0.5845	0.7267	0.7225	0.8131	0.4916	0.6171	0.5752	0.8657	0.5473	0.7755	0.7355	0.7875	0.6137	0.4532	0.4916	0.7206
DZANK1_58794_AA	0.771822	1	0	1	0.771822	1	0.5873	1	1	0.771822	1	1	1	1	0.0232	0.9373	1	0.348	0.771822	1	1	1	0	0.4276	1	0.7888	0.771822	0	1	0.3325	0.771822	1	1	0.5093	1	1	0.6035	0.5991	1	0.3991	0.6748	0	0	0	1	0.6748	1	0.2933	0
ENTPD6_58865_AA	0.5333	0.5919	0.634488	0.4916	0.7437	0.6735	0.5371	0.5919	0.5687	0.634488	0.7371	0.5752	0.5473	0.7558	0.6503	0.7558	0.381	0.5972	0.634488	0.4583	0.6007	0.5919	0.5856	0.5767	0.5211	0.634488	0.5371	0.6592	0.5708	0.634488	0.4916	0.5919	0.5801	0.5417	0.5301	0.6592	0.6712	0.6929	0.401	1	0.5542	0.6851	0.4916	0.7267	0.634488	0.6351	0.7437	0.7074	0.6929
HM13_58889_AD	0.7857	0.7278	0.5946	0.6471	0.6593	0.6814	0.7364	0.8652	0.6358	0.6384	0.7534	0.6151	0.622	0.7207	0.7857	0.5789	0.567	0.7722	0.7015	0.7534	0.5902	0.5207	0.7357	0.5974	0.7188	0.5437	0.8141	0.7031	0.7116	0.6593	0.6604	0.6406	0.6593	0.6762	0.5426	0.8462	0.7278	0.8754	0.6373	0.7153	0.8302	0.7364	0.6707	0.7404	0.697	0.8209	0.5697	0.7534	0.6339
NFS1_59220_AD	0.6659	0.9111	0.5922	0.7821	0.8903	0.5497	0.7807	0.9298	0.7621	0.6103	0.8522	0.5476	0.7936	0.6527	0.7369	0.8396	0.8474	0.8522	0.777977	0.6308	0.7014	0.6811	0.8676	0.7597	0.6157	0.8997	0.8368	0.8348	1	0.8567	0.6811	0.695	0.8245	0.6578	0.7621	0.8329	1	0.8153	0.7899	1	0.8309	0.7736	0.8103	0.6811	0.5325	0.7107	0.6188	0.8567	0.8724
DSN1_59316_AD	0.1384	0.4015	0.0341	0.1142	0.1858	0.3751	0.0918	0.1344	0.11	0.1384	0.2138	0.0761	0.132	0.1982	0.1207	0.2309	0.0848	0.1982	0.219072	0.1875	0.2705	0.3119	0.219072	0.1673	0.2918	0.219072	0.0761	0.6337	0.0423	0.1847	0.1371	0.4258	0.0267	0.3819	0.1748	0.3407	0.3101	0.2645	0.4119	0.219072	0.2786	0.5123	0.1415	0.2188	0.3308	0.2193	0.3751	0.4844	0.2069
RALGAPB_59380_AA	0.5238	0.8306	0.613	0.819	0.4681	0.552	0.7634	0.569	0.88	0.7253	0.6204	0.734239	0.5946	0.6594	0.7525	0.8261	0.7012	0.7379	0.734239	0.7519	0.6875	0.7409	0.569	0.7333	0.5803	0.734239	0.734239	0.9135	0.734239	0.734239	0.8684	0.8261	0.6644	0.613	0.8148	0.9406	0.7601	0.6014	0.7113	0.734239	0.5399	0.898	0.557	0.7325	0.734239	0.8148	0.7012	0.7448	0.8086
DBNDD2_59544_AD	0.4146	0.5305	0.4801	0.4712	0.7327	0.361	0.7104	0.7942	0.4691	0.5906	0.3472	0.5166	0.4701	0.5163	1	0.4498	0.4725	0.654	0.4048	0.5279	0.5854	0.5922	0.4045	0.5072	0.4654	0.5629	0.4512	0.4685	0.46	0.7163	0.7879	0.7919	0.5224	0.5389	0.4167	0.3617	0.4387	0.7494	0.4824	0.7473	0.4424	0.3936	0.5688	0.5377	0.3492	0.523	0.4619	0.4628	0.4343
PIGT_59553_AD	0.643308	0.643308	0.5961	0.7135	0.6975	0.6889	0.7397	0.8932	0.643308	0.5464	0.635	0.8408	0.5488	0.8124	0.5761	0.721	0.643308	0.3503	0.643308	0.6687	0.5818	0.4386	0.6676	0.6276	0.8405	0.8092	0.7857	1	0.8215	0.643308	0.643308	0.7047	0.7803	0.666	0.7963	0.7392	0.7001	0.6185	0.5732	0.7201	0.6398	1	0.5689	0.7416	0.7671	0.8462	0.4972	0.69	0.7963
ELMO2_59685_AA	0.4877	0.5875	0.7998	0.6168	0.5953	0.5127	0.5908	0.8456	0.5106	0.4485	0.5719	0.8514	0.6777	0.8043	0.6011	0.6035	0.5494	0.5654	0.619879	0.7334	0.6625	0.6918	0.7632	0.5978	0.7503	0.619879	0.861	0.9085	0.619879	0.619879	0.6117	0.6862	0.3757	0.593	0.619879	0.851	0.7127	0.5769	0.7789	0.7578	0.3497	0.4978	0.5117	0.6112	0.619879	0.6689	0.6466	0.8167	0.688
ZNF334_59691_AD	0.719088	0.4153	0.7419	0.6879	1	1	0.3687	1	0.3104	0.719088	1	0.5243	0.8182	0.9252	0.738	1	0.7861	0.9257	0.719088	0.6621	0.719088	0.6388	0.0685	1	0.719088	1	1	0.7538	0.719088	0.4236	1	0.59	0.5442	1	1	0.3879	0.7678	1	1	0.8486	0.6924	0.889	0.8546	0.6739	1	0.8899	0.6346	0.8671	0.719088
ZMYND8_59714_AD	0.3936	0.4597	0.345	0.3783	0.4378	0.476	0.4165	0.5048	0.3855	0.5388	0.3875	0.3046	0.5125	0.3687	0.2939	0.4335	0.3274	0.3285	0.45137	0.4258	0.4899	0.4698	0.5817	0.5982	0.43	0.2999	0.4165	0.4243	0.226	0.3124	0.476	0.4433	0.4988	0.5967	0.4557	0.2221	0.3712	0.5674	0.4584	0.4069	0.3072	0.4633	0.5107	0.4805	0.3417	0.3664	0.4332	0.5084	0.4959
ZMYND8_59719_AA	0.4006	0.6742	0.5575	0.5765	0.5975	0.668	0.4858	0.4212	0.7117	0.812	0.6082	0.637	0.7297	0.5689	0.5744	0.5588	0.3816	0.7332	0.628346	0.5556	0.848	0.6694	0.6644	0.585	0.4548	0.628346	0.628346	0.5798	0.628346	0.7481	0.5975	0.6321	0.5798	0.5863	0.5485	0.6449	0.6395	0.75	0.7446	0.5485	0.5628	0.5628	0.5391	0.6082	0.6539	0.6183	0.7505	0.537	0.6971
NCOA3_59723_AD	0.789	0.7713	0.386	0.7706	0.5136	0.5308	0.5549	0.6257	0.7788	0.64307	0.4231	0.64307	0.8821	0.7379	0.5752	0.6377	0.5136	0.5946	0.64307	0.7012	0.9249	0.7549	0.6063	0.5946	0.7076	0.64307	0.64307	0.5182	0.64307	0.8042	0.5182	0.656	0.4681	0.569	0.3697	0.6575	0.6226	0.7788	0.7177	0.64307	0.6875	0.7698	0.7713	0.4975	0.64307	0.5597	0.4521	0.6173	0.7253
SULF2_59730_AD	0.369	0.5174	0.1896	0.3785	0.3968	0.7451	0.369	0.4763	0.5057	0.511383	0.8143	0.3276	0.4673	0.349	0.6166	0.4353	0.511383	0.3276	0.511383	0.2262	0.21	0.511383	0.2633	0.6552	0.3878	0.369	0.4381	0.511383	1	0.4936	0.511383	0.4276	0.4872	0.6868	0.6718	0.6718	0.4223	0.577	0.2882	0.3187	0.2946	0.7353	0.3221	0.5814	0.6718	0.3519	0.5589	0.5938	0.7005
SALL4_59804_AD	1	0.7631	0.82	1	0.5509	0.5571	0.8156	1	0.903	1	0.7472	1	0.8717	0.6341	0.7998	0.5691	1	0.8178	0.856653	0.7389	0.6113	0.604	1	1	1	1	0.856653	0.8491	1	0.856653	0.9064	0.7812	0.6378	1	0.5444	0.8059	0.8289	0.6536	0.7472	0.6065	0.7346	0.6459	0.5168	0.5444	0.6903	1	0.8628	0.856653	1
RPS21_60075_AA	0.5583	0.1078	0.5316	0.4514	0.3189	0.4911	0.5417	0.5212	0.4057	0.1718	0.3185	0.4975	0.5865	0.4191	0.8094	0.4994	0.59	0.5594	0.1652	0.5758	0.572	0.1936	0.3941	0.6413	0.5055	0.2823	0.6005	0.3712	0.305	0.2647	0.4893	0.4874	0.3491	0.4581	0.5287	0.4616	0.7452	0.4958	0.655	0.5633	0.5355	0.6614	0.6214	0.3755	0.5407	0.5589	0.614	0.4609	0.2774
RPS21_60076_AD	0.314	0.1011	0.3194	0.1877	0.1902	0.2916	0.2721	0.3841	0.1818	0.1134	0.2282	0.242	0.3264	0.2334	0.5334	0.2793	0.316	0.4101	0.0642	0.3994	0.2071	0.1489	0.1857	0.3574	0.3718	0.1312	0.3531	0.1831	0.1263	0.2182	0.3409	0.2259	0.1825	0.257	0.3193	0.2958	0.6122	0.3401	0.1908	0.2761	0.4689	0.4835	0.4074	0.3257	0.3298	0.303	0.4065	0.3491	0.239
DIDO1_60095_AD	0.728	0.9518	1	0.9817	0.9641	0.7066	0.3165	1	1	0.3709	0.9368	0.4188	0.5723	0	0.4637	0.9829	0.5602	1	0.780139	0.0251	0.9653	0.982	0.3818	0.0413	0.9692	1	0.780139	0.9609	0.9026	1	0.9724	0.49	0.5619	0.6494	0.9586	0.6275	0.6388	0.8766	0.9832	0.9068	0.9205	0.6388	1	1	0	0.9215	0.9797	0.5526	0.9755
ATP5J_60270_AD	0.4796	0.4019	0.4148	0.4134	0.4764	0.4774	0.4355	0.6231	0.3081	0.276	0.4157	0.605	0.2742	0.5203	0.3615	0.2356	0.6434	0.2963	0.3066	0.4407	0.579	0.3379	0.3113	0.1968	0.2226	0.4543	0.2209	0.6308	0.2777	0.4189	0.4399	0.4543	0.32	0.4296	0.4316	0.5236	0.3413	0.5228	0.5284	0.5126	0.47	0.496	0.4255	0.4489	0.4285	0.2865	0.6688	0.7583	0.3932
ATP5J_60274_AD	0.4585	0.3852	0.2821	0.5158	0.5468	0.448	0.4477	0.4311	0.1786	0.3143	0.2223	0.4489	0.3931	0.3619	0.5391	0.3282	0.724	0.2797	0.3207	0.5985	0.5919	0.3401	0.3891	0.2264	0.1918	0.4147	0.172	0.563	0.3143	0.3866	0.3542	0.441	0.4784	0.4679	0.3303	0.3762	0.4685	0.5259	0.3694	0.356	0.3977	0.5476	0.5724	0.4942	0.2817	0.4095	0.5358	0.5258	0.3126
ATP5J_60276_AD	0.5957	0.6727	0.4751	0.7156	0.6818	0.5969	0.6285	0.4893	0.4598	0.662	0.3797	0.4815	0.7744	0.4853	0.7432	0.7169	0.7494	0.5745	0.6479	0.6984	0.6959	0.5832	0.7166	0.6351	0.6273	0.5523	0.549	0.5897	0.6643	0.6236	0.5414	0.6734	0.7793	0.5899	0.4881	0.5255	0.7184	0.5893	0.4976	0.5381	0.5979	0.6752	0.722	0.6923	0.4393	0.7561	0.4921	0.5063	0.5465
CYYR1_60292_AA	0.3318	0.3006	0.4129	0.4551	0.3362	0.5632	0.6171	0.4462	0.4329	0.411938	0.3196	0.4385	0.386	0.3066	0.5274	0.2753	0.311	0.5534	0.411938	0.392	0.3177	0.3362	0.3815	0.3874	0.4037	0.3259	0.411938	0.3259	0.4085	0.4149	0.4286	0.3334	0.3868	0.3362	0.4916	0.584	0.3259	0.3643	0.2602	0.3798	0.2353	0.5007	0.4362	0.4318	0.5828	0.4129	0.3982	0.2789	0.5991
EVA1C_60344_AD	0.406564	0.6399	0.3951	0.3012	0.3155	0.406564	0.557	0.3428	0.406564	0.1522	0.406564	0.4797	0.2503	0.406564	0.406564	0.537	0.69	0.1732	0.3545	0.5541	0.4218	0.5335	0.6418	0.8058	0.2075	0.2814	0.2328	0.3983	0.3532	0.5328	0.4738	0.4313	0.5988	0.2732	0.363	0.3992	0.3941	0.3934	0.5588	0.3397	0.8831	0.5079	0.6844	0.4299	0.4355	0.3774	0.3625	0.3453	0.275
C21orf59_60358_AA	0.7137	0.5217	0.8843	0.7369	0.7371	0.6433	0.5683	0.8275	0.7689	0.4809	0.567	0.7801	0.7912	0.6082	0.8293	0.803	0.8809	0.7887	0.8276	0.8651	0.7904	0.7442	0.5544	0.8735	0.7052	0.4255	0.5613	0.728	0.7251	0.7706	0.7091	0.7197	0.6862	0.8365	0.7038	0.756	0.8073	0.4301	0.6654	0.5451	0.8974	0.8044	0.8336	0.8742	0.7742	0.6541	0.7637	0.9073	0.5385
C21orf59_60359_AD	0.5446	0.5627	0.8696	0.6839	0.7423	0.7178	0.5282	0.8134	0.6857	0.4846	0.5802	0.7366	0.7669	0.6688	0.7748	0.7766	0.8929	0.7861	0.6988	0.8169	0.7954	0.7163	0.545	0.899	0.663	0.3895	0.4387	0.6672	0.524	0.7453	0.6809	0.6516	0.6489	0.7381	0.6908	0.7449	0.8623	0.4652	0.5036	0.5778	0.8902	0.7548	0.8039	0.8792	0.7395	0.6781	0.7879	0.9081	0.5644
PAXBP1_60376_AD	0.6617	0.6154	0.7458	0.5486	0.5793	0.456	0.6197	0.6617	0.4269	0.7458	0.456	0.5828	0.7586	0.6809	0.6377	0.5946	0.9021	0.5828	0.627615	0.6769	0.5659	0.7702	0.4231	0.4871	0.3585	0.4068	0.627615	0.761	0.627615	0.506	0.6143	0.5379	0.6263	0.794	0.7774	0.6263	0.7458	0.6506	0.5399	0.6535	0.5514	0.8117	0.8341	0.6769	0.8158	0.7756	0.8239	0.4892	0.4269
IFNAR2_60390_AA	0.725	0.534	0.8179	0.6906	0.768	0.7004	0.7851	0.5237	0.6902	0.9296	0.7438	0.925	0.8727	0.7736	0.7613	0.6742	0.6401	0.6735	0.9908	0.684	0.7597	0.7848	0.7689	0.7473	0.7691	0.9369	0.9308	0.9437	0.9199	0.8588	0.5728	0.7938	0.7617	0.8324	0.8525	0.7814	0.7286	0.7296	0.7344	0.9763	0.6776	0.8059	0.8018	0.6074	0.9478	0.6154	0.7437	0.6464	0.6848
IFNAR2_60396_AA	0.3444	0.5826	0.3444	0.4233	0.5677	0.2729	0.6307	0.3738	0.5417	0.5677	0.437	0.5573	0.462	0.5226	0.4508	0.5826	0.6146	0.5315	0.3649	0.484	0.5185	0.3715	0.7028	0.4287	0.4668	0.5347	0.5162	0.3964	0.7976	0.5475	0.7066	0.484	0.5397	0.5374	0.5175	0.6017	0.4119	0.3964	0.5873	0.5463	0.4906	0.2594	0.4578	0.6178	0.514105	0.7157	0.5463	0.6907	0.413
DNAJC28_60425_AD	0.3087	0.3509	0.2321	0.4095	0.5452	0.351793	0.372	0.1014	0.2025	0.22	0.4718	0.2794	0.3459	0.4478	0.351793	0.2895	0.22	0.3383	0.351793	0.3607	0.4583	0.3882	0.22	0.3166	0.351793	0.4685	0.351793	0.4846	0.351793	0.351793	0.1236	0.4968	0.1158	0.351793	0.351793	0.3534	0.1903	0.1814	0.2476	0.351793	0.5301	0.234	0.2702	0.3489	0.351793	0.4368	0.2661	0.4783	0.4254
SETD4_60521_AA	0.0725	0.2998	0.3487	0.2978	0.304695	0.4063	0.2998	0.1975	0.3394	0.304695	0.2044	0.2431	0.591	0.3598	0.2998	0.6427	0.304695	0.084	0.304695	0.6159	0	0.426	0.2711	0.1377	0	0.0439	0.6162	0.2948	0.304695	0.084	0.304695	0.6208	0.3394	0.1616	0.0967	0.3102	0.4715	0.6981	0.1836	0.7896	0.6938	0.2398	0.2902	0.4137	0.304695	0.2782	0.263	0.214	0.2987
HMGN1_60613_AA	0.683606	0.9298	0.6755	0.7849	0.7498	0.6679	0.8346	0.8502	0.4862	0.683606	0.5867	0.6968	0.612	0.5955	0.6543	0.7224	0.8388	0.4364	0.8688	0.8388	0.7087	0.6395	0.683606	0.8255	0.6076	0.7029	0.7593	0.6373	0.791	0.612	0.5317	0.6373	1	0.7029	0.791	0.5247	0.6838	0.683606	0.5727	0.726	0.5463	0.791	0.5013	0.7559	0.6395	0.6852	0.7066	0.6167	0.612
SH3BGR_60642_AD	0.8345	0.9191	0.5238	1	0.804831	0.8266	0.7196	0.7458	0.7634	0.914	0.8462	0.804831	0.6581	0.9051	0.6535	1	0.8013	0.7571	0.804831	0.804831	0.8462	0.9083	0.9242	0.4783	0.8462	0.6091	1	0.7624	0.8851	0.6471	0.7458	0.8238	0.7624	1	0.8544	0.8319	0.8148	1	0.8105	0.8462	0.6471	1	0.8544	0.8544	1	1	0.804831	0.804831	0.804831
SH3BGR_60643_AD	0.7067	0.6559	0.8312	0.7975	0.4077	0.8568	0.6898	0.4737	0.7182	0.8257	0.7952	0.712606	0.5774	0.7128	0.7807	0.6793	0.8199	0.8552	0.712606	0.712606	1	1	0.6686	0.7703	0.8563	0.7681	0.905	0.6605	0.8861	0.7781	0.7387	0.818	0.8993	0.405	0.7365	0.9096	1	1	0.8164	1	0.8796	0.7511	0.5937	0.8512	0.4547	0.8051	0.712606	0.488	0.082
ADARB1_60864_AD	0.0733	0.241929	0.186	0.207	0.1341	0.241929	0.241929	0.1233	0.2011	0.241929	0.4923	0	0.147	0	0.1734	0.1934	0.4149	0.1029	0.2862	0.3595	0.3501	0.2773	0.0531	0.242	0	0	0.241929	0.1298	0.1911	0.2937	0	0.3533	0.376	0.109	0.0416	0.1998	0.3065	0.2553	0.2824	0	0.6609	0.2418	0.3618	0.4931	0	0.3088	0.241929	0.0941	0.197
POFUT2_60872_AD	0.151	0.0739	0.0371	0.0775	0.1269	0.1636	0.1285	0.2246	0.1101	0.0893	0.0853	0.2744	0.2511	0.2015	0.0893	0.1439	0.0914	0.122	0.2264	0.2138	0.0593	0.2672	0.0704	0.1751	0.2752	0.1353	0.1441	0.2517	0.1778	0.1614	0.2347	0.2052	0.24	0.2659	0.3419	0.3182	0.3236	0.1016	0.0878	0.2819	0.1689	0.236	0.3509	0.2257	0.5503	0.2113	0.2896	0.1152	0.1212
C22orf29_61086_AD	0.1674	0.4151	0.5247	0.465	0.2965	0.49	0.5305	0.5309	0.1174	0.3621	0.3542	0.1647	0.6762	0.425	0.395901	0.2928	0.1737	0.27	0.3319	0.3524	0.427	0.5145	0.395901	0.3378	0.4395	0.395901	0.4599	0.5419	0.5317	0.3995	0.5742	0.4992	0.2736	0.2796	0.4409	0.5437	0.4669	0.395901	0.256	0.5072	0.4061	0.4762	0.4918	0.4151	0.395901	0.2965	0.4701	0.4364	0.4932
TANGO2_61128_AD	0.3178	0.3976	0.416	0.3456	0.4256	0.6501	0.3468	0.593	0.2504	0.3165	0.3103	0.5507	0.4231	0.3941	0.2604	0.5225	0.1935	0.2923	0.4131	0.2895	0.1461	0.2604	0.401	0.3352	0.3744	0.4155	0.4802	0.4096	0.3548	0.3056	0.3489	0.4881	0.3769	0.6787	0.3976	0.3866	0.4169	0.5066	0.3879	0.386	0.4231	0.2569	0.3914	0.4407	0.4681	0.2825	0.5014	0.3723	0.6338
SCARF2_61158_AA	0.3281	0.4607	0.404871	0.259	0.404871	0.2993	0.1962	0.3629	0.4159	0.404871	0.4077	0.404871	0.5617	0.6493	0.3522	0.268	0.204	0.2993	0.404871	0.2217	0.404871	0.4159	0.489	0.5617	0.4227	0.5497	0.695	0.3452	0.3326	0.7193	0.404871	0.3675	0.4159	0.404871	0.4834	0.5424	0.4607	0.202	0.3219	0.6308	0.2993	0.4447	0.2752	0.2217	0.7193	0.4159	0.404871	0.4607	0.4992
PPIL2_61242_AA	0.3508	0.7593	0.1466	0.471	0.6182	1	0.4654	0.4896	0.3894	0.6276	0.5567	0.4689	0.4682	0.7235	0.3862	0.4423	0.7128	0.6388	0.2033	0.211	0.1016	0.4021	0.8352	0.3772	0.075	0.253	0.2498	0.7819	0	0.3144	0.4858	0.1726	0.2827	0.4358	0.3384	0.4421	0.0374	0.5231	0.7252	0.6964	0.55	0.4899	0.5775	0.516	0.5299	0.432	0.4935	0.2615	0.4032
PPIL2_61245_AA	0.3589	0.7675	0.1279	0.368	0.4169	0.2167	0.4539	0.3562	0.3765	0.3046	0.6783	0.3364	0.5044	0.5512	0.4718	0.3752	0.6198	0.5136	0.2973	0.2511	0.1358	0.3605	0.5443	0.3043	0.0721	0.2281	0.1609	0.6264	0	0.3804	0.3016	0.1995	0.3746	0.3023	0.3028	0.4028	0.0472	0.4089	0.5284	0.6188	0.5489	0.5878	0.5102	0.5254	0.6963	0.389	0.3051	0.3035	0.3557
PPIL2_61247_AA	0.573	0.5486	0.539	0.4765	0.3945	0	0.5633	0.4419	0.5545	0.267	0.6757	0.4434	0.6197	0.3732	0.6384	0.5057	0.4522	0.4357	0.7139	0.6299	0.6717	0.5648	0.2858	0.4747	0.5817	0.5814	0.4797	0.3702	0.6374	0.6183	0.3881	0.6196	0.6637	0.4525	0.5491	0.5317	0.6154	0.4549	0.3927	0.5183	0.5799	0.6713	0.511	0.5813	0.7797	0.5388	0.3715	0.597	0.4923
DERL3_61333_AA	0.3879	0.4477	0.353	0.5936	0.3245	0.6662	0.5777	0.3681	0.3587	0.3457	0.4164	0.4343	0.5061	0.3899	0.479989	0.6189	0.711	0.5904	0.7149	0.7506	0.6344	0.5076	0.1486	0.3582	0.6867	0.4727	0.3464	0.4797	0.4118	0.7536	0.4364	0.4156	0.4735	0.596	0.3256	0.5165	0.604	0.4002	0.645	0.4215	0.2627	0.6341	0.1607	0.2846	0.4526	0.3975	0.7608	0.7686	0.3537
SLC2A11_61345_AA	0.2801	0.362	0.3722	0.3915	0.2756	0.1949	0.3205	0.3991	0.1866	0.1347	0.3351	0.3183	0.3837	0.4028	0.5879	0.4239	0.6635	0.3765	0.3837	0.4409	0.1819	0.4028	0.0883	0.3505	0.1719	0.4536	0.206	0.3386	0.0364	0.5546	0.3542	0.4132	0.0767	0.3837	0.3416	0.4612	0.5405	0.2278	0.1623	0.3603	0.3061	0.3416	0.4124	0.3012	0.3634	0.5093	0.4829	0.2987	0.1827
GGT1_61437_AA	0.2126	0.3027	0.2857	0.3474	0.3163	0.3243	0.2983	0.6688	0.2325	0.04	0.2021	0.3631	0.4427	0.3772	0.1222	0.4228	0.3492	0.1782	0.2697	0.5174	0.3944	0.3804	0.0131	0.5166	0.2838	0.4881	0.4137	0.3951	0.4385	0.5612	0.433	0.5403	0.6167	0.5758	0.7422	0.2466	0.466	0.447	0.1306	0.6622	0.2297	0.5899	0.4897	0.5044	0.752	0.7406	0.6935	0.3337	0.3552
GGT1_61440_AA	0.547	0.6402	0.5025	0.7387	0.7385	0.7637	0.6695	0.7973	0.5739	0.6263	0.4423	0.4229	0.6959	0.44	0.6022	0.7451	0.6621	0.4788	0.5858	0.761	0.6493	0.7882	0.562	0.7089	0.6828	0.7441	0.6598	0.6447	0.6116	0.7555	0.5268	0.6751	0.6806	0.8246	0.8723	0.4552	0.7649	0.712	0.6848	0.6792	0.7102	0.8095	0.6777	0.7435	0.847	0.8537	0.7456	0.6891	0.7812
GGT1_61456_AD	0.6695	0.7892	0.613778	0.6699	0.6335	0.4471	0.7111	0.7796	0.5025	0.5384	0.6423	0.4666	0.595	0.6823	0.7294	0.6379	0.7996	0.4235	0.3328	0.5286	0.5591	0.6603	0.6726	0.5729	0.5709	0.5449	0.7202	0.6724	0.3524	0.4181	0.5359	0.3745	0.6086	0.667	0.5212	0.5044	0.5232	0.536	0.5149	0.4233	0.5808	0.5519	0.5265	0.7553	0.613778	0.6885	0.613778	0.5562	0.6633
HPS4_61510_AD	0.6257	0.5442	0.4695	0.5158	0.5959	0.4958	0.5552	0.5673	0.4851	0.3561	0.3416	0.3597	0.4695	0.483	0.5611	0.6257	0.3296	0.4287	0.507662	0.5832	0.5413	0.3645	0.6324	0.6071	0.4013	0.4625	0.5343	0.6781	0.507662	0.4033	0.6483	0.5856	0.4695	0.3491	0.6257	0.5221	0.5158	0.4958	0.5442	0.4695	0.6406	0.6533	0.3597	0.5959	0.507662	0.371	0.3899	0.6847	0.5959
EIF4ENIF1_61857_AA	0.3495	0.1535	0.2627	0.5801	0.2165	0.2363	0.2949	0.3386	0.2308	0.392	0.5708	0.44	0.284	0.4204	0.3483	0.3871	0.3993	0.3982	0.3259	0.2862	0.3833	0.5171	0.2789	0.4065	0.3453	0.3672	0.1691	0.4987	0.2438	0.4318	0.2745	0.518	0.3636	0.1184	0.2711	0.3027	0.5919	0.284	0.3896	0.456	0.3672	0.5389	0.4112	0.3739	0.3607	0.1769	0.1245	0.3259	0.3394
APOL3_61995_AA	0.572	0.3931	0.2173	0.3456	0.4806	0.389808	0.4157	0.4676	0.2652	0.3163	0.3431	0.4064	0.4329	0.3277	0.4097	0.3112	0.1852	0.5569	0.3261	0.3786	0.1601	0.2689	0.3067	0.4307	0.187	0.0865	0.389808	0.3076	0.357	0.272	0.3955	0.3206	0.4165	0.4142	0.389808	0.6425	0.7806	0.3253	0.311	0.4928	0.3512	0.3621	0.6148	0.6532	0.4806	0.4762	0.5881	0.389808	0.2173
GCAT_62160_AA	0.0454	0.0968	0.0621	0.0566	0.1819	0.2635	0.129	0.0568	0.016	0.0741	0.1417	0.239	0.1983	0.0678	0.0581	0.2248	0.0621	0.1809	0.1033	0.3873	0.0837	0.3148	0.0594	0.0746	0.0302	0.0556	0.1891	0.0326	0.0737	0.0447	0.0715	0.175	0.1863	0.0392	0.3852	0.1983	0.1641	0.2723	0.0704	0.0271	0.0291	0.12	0.2574	0.0601	0.0302	0.0235	0.3203	0.2132	0.2053
WBP2NL_62486_AD	1	1	0.6933	1	0.5073	1	0.968081	1	1	1	1	1	1	0.968081	0.968081	1	1	1	1	1	1	1	1	1	1	1	1	1	1	0.968081	0.968081	1	1	1	1	1	1	1	1	0.968081	0.5663	1	1	1	0.7288	0.968081	1	1	1
NAGA_62492_AA	0.5778	0.6887	0.5585	0.5265	0.5804	0.53	0.5589	0.5166	0.5641	0.4922	0.6793	0.5434	0.5286	0.5665	0.7507	0.5174	0.5197	0.6297	0.555862	0.4334	0.6534	0.536	0.5096	0.6807	0.7714	0.5647	0.5163	0.6485	0.3789	0.5221	0.6069	0.5667	0.4584	0.3357	0.475	0.5905	0.5022	0.4573	0.6646	0.8171	0.6829	0.6804	0.5053	0.6182	0.555862	0.5038	0.7043	0.4649	0.4458
TCF20_62500_AA	0.5682	0.6937	0.725	0.5893	0.5479	0.4017	0.6033	0.4634	0.5985	0.4967	0.5856	0.6366	0.5303	0.5441	0.6659	0.5645	0.6935	0.4549	0.5926	0.5537	0.6271	0.527	0.6899	0.5723	0.4211	0.5976	0.5926	0.6622	0.736	0.4479	0.6598	0.5444	0.5549	0.5061	0.7519	0.4923	0.5261	0.6918	0.5926	0.5746	0.6638	0.7695	0.6471	0.5534	0.6333	0.6581	0.6071	0.5818	0.5058
SERHL2_62508_AD	0.5044	0.8012	0.8546	0.652	1	1	0.6188	0.9326	0.799	0.3432	0.5822	0.9431	0.5578	0.8672	1	0.8932	0.4154	0.2843	0.6242	0.9115	0.8839	0.7913	0.9012	0.8784	0.5828	0.7016	0.918	0.5669	0.7357	1	0.8635	0.5855	0.5988	0.6245	0.6913	0.5511	0.9296	0.7158	0.2723	0.8592	0.3882	0.7948	0.5977	0.94	0.8458	0.7334	0.8218	0.9149	1
TRMU_62711_AA	0.704471	0.5623	0.8476	0.7842	0.3853	0.704471	0.7051	0.3915	0.704471	0.2146	0.704471	0.7649	0.7291	0.5774	0.5111	0.7173	0.704471	0.7939	0.704471	0.8137	0.746	0.6432	0.3011	0.6199	0.9094	0.704471	0.4091	0.7761	0.6963	1	0.7283	0.922	0.8574	0.704471	0.8371	0.7982	0.8997	0.7372	0.6428	0.916	0.5446	0.6911	0.6874	0.6736	0.704471	0.7891	0.8049	0.704471	0.704471
MOV10L1_62786_AD	1	1	1	1	1	1	1	1	1	1	0.6171	1	1	1	0.8073	1	0.7206	1	1	1	1	0.7999	1	1	1	1	1	1	1	1	1	0.8449	1	1	1	1	1	1	1	1	1	0.7478	0.3998	0.221	1	1	1	1	1
TUBGCP6_62794_AD	0.2549	0.2792	0.4112	0.2407	0.3517	0.2643	0.3051	0.3058	0.3372	0.4024	0.3673	0.4829	0.383	0.3745	0.4062	0.3202	0.4731	0.5016	0.4225	0.4439	0.5769	0.4242	0.1097	0.3224	0.4813	0.4597	0.3313	0.5799	0.3625	0.4661	0.415	0.4085	0.3934	0.4218	0.3877	0.5497	0.645	0.4938	0.4881	0.6662	0.3888	0.6258	0.597	0.5137	0.7192	0.5647	0.6882	0.2916	0.2496
LMF2_62836_AA	0.0732	0.0455	0.1301	0.0641	0.0817	0.0105	0.1385	0.0764	0.0203	0.0442	0.1184	0.0747	0.1554	0.0883	0.1537	0.0959	0.2724	0.1016	0.1844	0.5215	0.0813	0.1981	0.0462	0.1292	0.4194	0.1324	0.1157	0.1036	0.1199	0.2958	0.1607	0.1516	0.0739	0.1645	0.1554	0.2075	0.1913	0.1922	0.0999	0.4588	0.1469	0.4908	0.2137	0.1211	0.672	0.305	0.2604	0.0813	0.097
TYMP_62852_AA	0.3376	0.4977	0.6132	0.2586	0.5311	0.5924	0.4422	0.5432	0.4805	0.3978	0.4422	0.4134	0.4626	0.5955	0.5048	0.3709	0.365	0.51829	0.3862	0.4422	0.4664	0.3615	0.5566	0.4422	0.4805	0.4703	0.4905	0.588	0.4096	0.4932	0.6733	0.6132	0.509	0.4188	0.6132	0.7351	0.5116	0.3401	0.3788	0.6003	0.5838	0.5753	0.5216	0.6531	0.5432	0.4977	0.5968	0.3641	0.704
ODF3B_62858_AA	0.1539	0.1852	0.2754	0.2546	0.2373	0.2586	0.2196	0.3004	0.3276	0.2984	0.2574	0.2974	0.2158	0.3206	0.5449	0.2692	0.3794	0.3953	0.3381	0.4984	0.2316	0.2787	0.1782	0.3364	0.4316	0.2275	0.2268	0.2753	0.207	0.4194	0.3624	0.2689	0.3316	0.4457	0.2197	0.5176	0.5836	0.264	0.2319	0.4304	0.3586	0.5439	0.4674	0.4847	0.4641	0.626	0.6215	0.2674	0.105
ARSA_62900_AD	0.1027	0.433	0.276119	0.2485	0	0.4723	0.4159	0.4119	0.4805	0.276119	0.374	0.276119	0.4217	0.2598	0.2323	0.3799	0.3139	0.2396	0.276119	0.1562	0.2268	0.276119	0.3475	0.1216	0.1764	0.662	0.2315	0.2659	0.3184	0.5289	0	0	0.1334	0.4339	0.4478	0.2571	0.2007	0.326	0.0994	0.1321	0.0972	0.353	0.2116	0.1311	0.276119	0.1636	0.276119	0.6278	0.156
RABL2B_62921_AD	0.5108	0.3179	0.8234	0.4617	0.6416	0.4507	0.2582	0.3723	0.583	0.460897	0.4194	0.343	0.4381	0.4531	0.503	0.4537	0.3799	0.5738	0.460897	0.3737	0.6682	0.5741	0.4653	0.3706	0.3833	0.723	0.5542	0.5382	0.1828	0.5174	0.633	0.6911	0.3371	0.4077	0.5362	0.6565	0.5186	0.4581	0.3737	0.5458	0.3241	0.6772	0.6851	0.5776	0.6509	0.5946	0.544	0.487	0.4825
SETMAR_62996_AA	0.835	0.6584	0.6526	0.7567	0.7848	0.3212	0.7067	0.589	0.7808	0.7677	0.7998	0.7804	0.5608	0.9214	0.7989	0.6138	0.8712	0.7912	0.8548	0.9476	0.7682	0.8085	0.7683	0.7784	0.6014	0.8967	0.6777	0.8557	0.5123	0.7334	0.9384	0.6205	0.7767	0.7871	0.5125	0.764	0.7971	0.5517	0.7895	0.956	0.7574	0.8511	0.754	0.7801	0.8429	0.6853	0.7514	0.885	0.649
THUMPD3_63081_AD	0.3231	0.4022	0.5714	0.3726	0.2596	0.3265	0.4723	0.3689	0.223	0.1239	0.5875	0.2254	0.321	0.4811	0.3724	0.4348	0.3459	0.3565	0.39836	0.446	0.3678	0.3644	0.127	0.2143	0.3889	0.4211	0.1791	0.2281	0.0638	0.2524	0.4844	0.3774	0.4054	0.3459	0.4762	0.4807	0.3304	0.431	0.3755	0.3265	0.3803	0.4907	0.3096	0.3423	0.39836	0.443	0.4159	0.4211	0.3569
THUMPD3_63082_AD	0.3325	0.373	0.1925	0.205	0.3616	0.3522	0.2573	0.1753	0.2981	0.129	0.2923	0.2579	0.2229	0.4335	0.5746	0.5529	0.6612	0.3905	0.36103	0.3643	0.5319	0.2456	0.1657	0.1633	0.5242	0.2361	0.1329	0.402	0.0519	0.2592	0.5402	0.5476	0.3932	0.2437	0.1541	0.5376	0.3748	0.4401	0.5847	0.3594	0.4067	0.4634	0.1785	0.4281	0.3381	0.3131	0.3932	0.4494	0.2585
THUMPD3_63083_AD	0.6824	0.6599	0.2946	0.5142	0.7258	0.6364	0.5252	0.4007	0.7698	0.5009	0.3697	0.7397	0.5232	0.6821	0.7962	0.76	0.8972	0.7228	0.4288	0.6445	0.7862	0.6023	0.6132	0.5749	0.781	0.525	0.7209	0.8447	0.6537	0.5494	0.7539	0.8045	0.6552	0.6008	0.298	0.6908	0.7491	0.6795	0.8181	0.6831	0.6481	0.6669	0.4772	0.736	0.628794	0.5118	0.6268	0.6437	0.5424
SETD5_63094_AA	0.5914	0.2911	0.3329	0.5155	0.3079	0.3785	0.2619	0.374	0.3341	0.41667	0.3088	0.614	0.3983	0.4216	0.3547	0.5035	0.5143	0.3912	0.41667	0.548	0.5015	0.2387	0.2669	0.4189	0.4181	0.4142	0.41667	0.33	0.41667	0.41667	0.4026	0.3387	0.4314	0.3519	0.2464	0.4498	0.4449	0.4013	0.6179	0.3598	0.4785	0.4719	0.5124	0.5007	0.41667	0.4501	0.4303	0.4539	0.4137
BRPF1_63156_AA	0.3868	0.3259	0.3982	0.381	0.392	0.2321	0.4441	0.3618	0.4731	0.3559	0.4583	0.4085	0.4678	0.3643	0.2872	0.4391	0.4916	0.5018	0.8855	0.5089	0.4916	0.4568	0.4362	0.4057	0.4916	0.3259	0.3259	0.5668	0.4744	0.392	0.4204	0.3438	0.5078	0.4699	0.3715	0.45	0.4049	0.5154	0.2789	0.3259	0.3833	0.3581	0.5725	0.4129	0.4532	0.401	0.3259	0.3259	0.3767
BRPF1_63157_AD	0.2049	0.2761	0.2933	0.287	0.3194	0.4246	0.2801	0.2342	0.2441	0.1424	0.4072	0.4028	0.4829	0.4536	0.272	0.1719	0.3695	0.35	0.1215	0.2464	0.0977	0.3234	0.259	0.2782	0.3883	0.4536	0.313338	0.1917	0.5453	0.3722	0.2646	0.4301	0.4536	0.1095	0.7034	0.3004	0.5425	0.4301	0.5624	0.4276	0.2232	0.2334	0.4652	0.2727	0.5425	0.242	0.4637	0.2395	0.2493
OGG1_63165_AA	0.3129	0.1884	0.239	0.1424	0.291	0.2404	0.2419	0.1443	0.0911	0.2665	0.2693	0.3157	0.27	0.339	0.1318	0.2302	0.0795	0.0851	0.2579	0.3168	0.0939	0.1093	0.2168	0.3581	0.1985	0.2574	0.3422	0.0742	0.2417	0.6446	0.3285	0.3729	0.3213	0.3451	0.2235	0.1388	0.2614	0.2426	0.2153	0.216709	0.275	0.2594	0.1298	0.1025	0.4112	0.3064	0	0.194	0.0688
ARPC4_63191_AD	0.8336	0.6472	0.7949	0.8013	0.7603	0.9265	0.77051	0.8622	0.7125	0.6682	0.7436	0.9257	0.8726	0.5624	0.6647	0.9335	0.8115	0.577	0.77051	0.5502	0.6704	0.8095	0.7936	0.902	0.9079	0.8095	1	0.7329	0.7466	1	0.514	0.888	0.8814	0.8831	0.9136	0.8989	0.8645	0.7475	0.6526	0.8835	0.6619	0.9364	1	0.8695	0.8192	0.7019	0.7165	0.8011	0.697
TTLL3_63216_AA	0	0	0	0.3339	0.253385	0.253385	0.1706	0.0865	0.1768	0.8322	0	0.5334	0.253385	0.365	0.3262	0.1113	0.253385	0.1664	0.253385	0.2813	0.1595	0.4337	0.2453	0.0971	0.6596	0.4681	0.1918	0.2171	0.1263	0.7504	0.253385	0.253385	0.2924	0.2374	0.1184	0.6456	0.365	0.0708	0.2542	0.253385	0.112	0.2601	0	0.1367	0.2993	0.1006	0.4177	0.2136	0.6816
IL17RE_63242_AA	0.61384	0.61384	0.3961	0.675	0.5893	0.61384	0.4103	0.6212	0.61384	0.61384	0.6212	0.4335	0.711	0.61384	0.61384	0.5223	0.61384	0.6362	0.61384	0.8139	0.711	0.5554	0.61384	0.427	0.5605	0.711	0.5223	0.675	0.5394	0.61384	0.4665	0.7928	0.6567	0.8627	0.5223	0.6456	0.8139	0.61384	1	0.6567	0.7184	0.5605	0.7504	0.8627	0.711	0.4889	0.546	0.4059	0.61384
IL17RC_63261_AD	0.0191	0.056	0.2342	0.0934	0.1779	0.0541	0.127	0.1858	0.0449	0.0495	0.0945	0.24	0.108	0.219	0.1369	0.1194	0.1252	0.1151	0.1082	0.2941	0.1191	0.3191	0.1288	0.1409	0.1606	0.1389	0.1392	0.337	0.071	0.1564	0.2393	0.1275	0.1061	0.1876	0.1651	0.1939	0.2082	0.1037	0.0444	0.2863	0.1437	0.2903	0.2944	0.2503	0.6564	0.3469	0.3091	0.116	0.08
TSEN2_63434_AD	1	1	1	0.9119	0.8661	1	1	0.9031	0.8562	0.833019	1	0.8661	0.6272	0.8787	0.8787	0.8233	0.5874	1	0.833019	0.8233	1	0.5087	1	0.831	1	0.8381	1	0.9255	0.6444	0.6743	1	0.9031	1	1	1	1	0.8506	0.8892	1	0.833019	0.7564	0.7709	0.7072	0.7796	0.7401	0.6211	0.8613	0.8787	0.6949
TSEN2_63435_AD	0.3051	0.6372	0.6755	0.5967	0.7389	0.502	0.6685	0.6955	0.853	0.3692	0.5993	0.7092	0.6144	0.3258	0.3533	0.6612	0.2807	0.5591	0.499542	0.3692	0.2971	0.4134	0.2336	0.5831	0.6612	0.5654	0.5495	0.7163	0.5941	0.2807	0.4126	0.4089	0.4384	0.4258	0.3341	0.4171	0.3907	0.6988	0.2874	0.499542	0.3575	0.4766	0.536	0.8924	0.3971	0.3958	0.4882	0.6685	0.904
MRPS25_63541_AA	1	1	1	1	1	1	1	1	0.94932	0.94932	0.94932	1	1	0.94932	1	1	0.94932	0.8528	0.94932	1	1	1	1	1	0.94932	1	1	1	1	1	1	0.827	1	1	1	0.5324	1	1	0.6468	1	1	0.7866	1	1	1	1	0.602	1	1
SGOL1_63701_AD	0.6252	0.952351	0.8026	1	1	1	1	1	0.952351	0.952351	0.952351	0.952351	0.5104	0.952351	0.952351	1	1	1	1	0.8602	1	1	1	1	0.8873	0.952351	0.952351	0.952351	1	1	0.952351	1	0.952351	1	0.952351	1	1	0.952351	0.5453	0.952351	0.7057	1	0.6964	1	0.4548	1	1	1	1
AZI2_63795_AA	0.6437	0.6828	0.6326	0.549	0.5344	0.5344	0.3429	0.505	0.3894	0.5089	0.5954	0.4983	0.3086	0.5089	0.3646	0.623	0.5152	0.5515	0.6567	0.6145	0.6048	0.4689	0.5893	0.539	0.3646	0.626	0.4672	0.3086	0.4889	0.4177	0.6801	0.6688	0.6906	0.4889	0.4556	0.401	0.7132	0.5801	0.4681	0.6906	0.6485	0.5725	0.623	0.5543	0.6906	0.6145	0.5605	0.4889	0.5344
RBMS3_63805_AA	0.4916	0.7437	0.8855	0.6322	0.4532	0.6171	0.7691	0.4462	0.4622	0.658374	0.6394	0.9063	0.658374	0.7437	0.5845	0.6769	0.5632	0.6745	0.658374	0.6989	0.8073	0.7586	0.658374	0.78	0.8417	0.658374	0.658374	0.5687	0.658374	0.658374	0.658374	0.7074	0.7632	0.8131	0.7437	0.6592	0.4916	0.6031	0.4916	0.8855	0.6769	0.4532	0.4362	0.8969	0.6351	0.6074	0.658374	0.5443	0.6975
ACAA1_64017_AD	0.4694	0.6037	0.8387	0.815	0.6111	0.6755	0.7292	0.7072	0.5911	0.3666	0.6806	0.6394	0.7712	0.7035	0.6519	0.7475	0.6446	0.6142	0.8005	0.787	0.5538	0.6386	0.633	0.6031	0.8371	0.6679	0.817	0.908	0.568	0.7502	0.8045	0.7802	0.7241	0.752	0.7859	0.8087	0.8655	0.6725	0.5599	0.7389	0.6568	0.876	0.8588	0.7618	0.8853	0.8377	0.8325	0.6572	0.4797
ZNF621_64243_AD	1	0.6978	1	0.7171	0.8445	0.935	1	0.7677	0.7548	0.7918	0.8248	0.7725	0.7373	1	0.7701	0.7771	0.9244	0.9106	0.878082	0.876	0.9383	0.8716	0.7207	0.8321	0.9176	1	1	0.9048	1	0.867	0.8412	0.7836	0.7725	0.7725	1	1	0.9403	0.9157	1	1	1	0.9072	1	0.867	0.7492	0.816	0.8645	0.8873	0.889
ZNF662_64334_AA	0.7078	0.8657	1	1	1	1	1	1	1	0.5991	1	0.9574	0.9114	0.7715	1	0.9307	1	0.8929	0.904363	0.7912	0.904363	0.904363	1	1	1	0.904363	0.6389	0.9692	0.904363	1	1	0.9214	0.8044	0.9342	1	0.7823	0.9311	0.775	0.904363	0.8228	1	0.8085	0.9403	0.7869	0.9142	0.9461	0.8835	0.8998	1
TCAIM_64362_AA	0.7285	0.3992	0.7146	0.668	0.4843	0.429	0.3764	0.5783	0.5809	0.801	0.4549	0.5825	0.7146	0.4549	0.6414	0.6101	0.4366	0.3631	0.5522	0.5509	0.5176	0.6168	0.3492	0.7393	0.8746	0.4843	0.5522	0.4721	0.5522	0.8746	0.3195	0.6168	0.4109	0.5176	0.663	0.7411	0.5439	0.547	0.5773	0.7411	0.5729	0.6589	0.7285	0.6659	0.3003	0.481	0.5603	0.5839	0.7182
ZNF589_64577_AA	0.7632	0.8097	0.6929	0.6097	0.7437	0.744004	0.6286	0.6989	0.7119	0.4085	0.7719	0.78	0.8097	0.8915	0.7355	0.7838	1	0.5991	0.744004	0.6929	0.7206	0.7838	0.7437	0.5687	0.8354	0.6286	0.744004	0.7632	0.744004	0.744004	0.8969	0.7267	0.6286	0.5919	0.2438	0.5801	0.8476	0.8073	0.6592	0.6929	0.7437	0.7154	0.6445	0.6592	0.744004	0.744004	0.8627	0.8073	0.8186
NME6_64595_AD	0.6263	0.4269	0.456	0.4345	0.2759	0.3346	0.463	0.456	0.4014	0.516327	0.5828	0.3438	0.1436	0.4751	0.456	0.471	0.516327	0.6237	0.5399	0.6679	0.516327	0.7904	0.6263	0.3745	0.157	0.3585	0.3137	0.3745	0.5354	0.516327	0.516327	0.6535	0.5116	0.5896	0.3585	0.456	0.6535	0.456	0.3763	0.5116	0.5277	0.5828	0.6263	0.6263	0.516327	0.6014	0.3585	0.6088	0.5187
NME6_64633_AD	0.42	0.3261	0.2935	0.2703	0.2377	0.186	0.2768	0.2212	0.2951	0.6787	0.2588	0.3016	0.0471	0.2443	0.1869	0.4076	0.3324	0.3186	0.3498	0.4044	0.2047	0.2755	0.3381	0.145	0.083	0.2844	0.3871	0.1788	0.5131	0.1553	0.1929	0.4562	0.3347	0.3896	0.2166	0.1944	0.48	0.294	0.2246	0.4342	0.2993	0.2107	0.2639	0.3611	0.6532	0.3374	0.2001	0.5615	0.3351
NME6_64634_AD	0.2881	0.4383	0.4166	0.3509	0.5339	0.3565	0.3068	0.3062	0.4102	0.315612	0.2328	0.4657	0.3983	0.3245	0.2719	0.4776	0.1467	0.2426	0.3162	0.2978	0.2035	0.0903	0.2454	0.2285	0.394	0.4695	0.5865	0.305	0.5165	0.2149	0.2537	0.3049	0.3101	0.3595	0.3167	0.2323	0.3727	0.3175	0.3808	0.4907	0.3453	0.1998	0.212	0.2818	0.7391	0.275	0.3533	0.4782	0.3953
CCDC51_64650_AA	0.6285	0.4933	0.5072	0.4977	0.5556	0.4599	0.695	0.341	0.6724	0.5671	0.7286	0.6975	0.8527	0.4173	0.5688	0.7449	0.3804	0.484	0.5614	0.5289	0.5178	0.5448	0.4615	0.5824	0.5365	0.7849	0.7204	0.7448	0.7206	0.7511	0.8041	0.4227	0.8166	0.7262	0	0.5362	0.6485	0.4673	0.6245	0.9026	0.4044	0.4963	0.5056	0.6993	1	0.8017	0.3407	0.8477	0.6671
CCDC51_64652_AA	0.7919	1	0.7605	0.7249	0.9174	0.604	0.7697	0.8601	0.8418	0.8884	0.5912	0.7965	0.6264	0.7107	0.5756	0.9027	0.9025	0.8077	0.73485	0.867	0.7833	0.8564	1	0.6444	0.8373	0.7329	0.73485	0.763	0.7768	0.802	0.7736	0.6508	0.8623	0.6783	0.9163	0.7138	0.6135	0.7429	0.6305	0.8046	0.9119	0.7061	0.6137	0.5679	0.73485	0.5981	1	0.7826	0.8099
CCDC51_64653_AD	0.7624	1	0.6535	0.7983	0.7822	0.7812	0.7033	0.8101	0.7781	0.696182	0.6224	0.5525	0.3253	0.6289	0.5716	0.8358	0.9101	0.7289	0.7032	0.8016	0.7723	0.8178	1	0.8145	0.7478	0.5321	1	0.5739	0.7586	0.6689	0.6111	0.5586	0.696182	0.4903	0.9211	0.715	0.6432	0.7164	0.4731	0.696182	0.9309	0.7106	0.7078	0.5582	0.696182	0.5025	1	0.696182	0.8347
CCDC51_64654_AD	0.6044	0.4822	0.3501	0.6082	0.2899	0.7143	0.6436	0.2622	0.5875	0.3306	0.7555	0.4069	0.5913	0.3352	0.5557	0.5925	0.3875	0.3632	0.7913	0.4181	0.5044	0.4731	0.4583	0.767	0.4388	0.6305	0.9122	0.5243	0.6769	0.5739	0.6111	0.3218	0.5995	0.553	0.565144	0.5394	0.6732	0.565144	0.4731	0.7218	0.447	0.4571	0.5806	0.6841	1	0.6945	0.5216	0.7867	0.7021
ATRIP_64662_AD	0.096	0.304	0.4046	0.1452	0.2031	0.2207	0.1554	0.2839	0.0536	0.211947	0.0783	0.1605	0.2536	0.2896	0.1379	0.2031	0.1626	0.0838	0.211947	0.2031	0.124	0.2031	0.211947	0.3064	0.2292	0.0364	0.211947	0.1167	0.211947	0.0925	0.3376	0.2137	0.0237	0.211947	0.4333	0.1452	0.2669	0.1452	0.0925	0.2839	0.1693	0.2292	0.3729	0.2536	0.211947	0.3249	0.2896	0.0925	0.0582
ATRIP_64664_AD	0.8618	0.8624	1	1	0.7585	0.8373	0.8324	1	0.8017	0.910479	0.8549	1	0.7349	0.8386	1	1	1	1	0.910479	1	1	0.8447	1	1	0.708	1	0.910479	1	0.6488	1	1	1	1	0.6979	1	1	1	0.708	0.8701	0.7221	1	0.8026	0.8144	1	1	0.8319	1	1	0.887
SHISA5_64702_AD	0.85	0.745	0.5986	0.7047	0.795	0.8964	0.8678	0.6849	1	0.7664	0.7489	1	0.7885	0.6762	0.843	0.5635	0.754451	0.4474	0.754451	0.8818	0.7081	0.7204	0.5313	0.709	0.5905	0.4723	1	0.754451	0.8222	0.4723	1	0.5362	0.5399	0.9086	0.8284	0.8546	0.6374	0.7489	0.8651	0.8392	0.8068	0.754451	0.7476	1	0.754451	0.9394	0.6379	0.7256	0.5362
SLC26A6_64722_AA	0.4653	0.2165	0.6885	0.6592	0.3559	0.4916	0.4204	0.7206	0.4916	0.504668	0.4916	0.3453	0.5632	0.4622	0.504668	0.3974	0.504668	0.4916	0.5401	0.6237	0.4622	0.4532	0.504668	0.5632	0.4916	0.5473	0.3259	0.5542	0.5828	0.3453	0.6592	0.4916	0.5632	0.6592	0.7119	0.4916	0.4604	0.6592	0.4678	0.5473	0.7946	0.5828	0.5828	0.5473	0.7668	0.3868	0.5828	0.3672	0.504668
NCKIPSD_64733_AA	0.6507	0.7517	0.4467	0.5654	0.5532	0.645	0.6895	0.5682	0.5737	0.4022	0.4866	0.6794	0.5477	0.4778	0.5737	0.5948	0.5894	0.5793	0.546439	0.4832	0.6562	0.4285	0.6989	0.5049	0.6175	0.4467	0.8898	0.5184	0.5401	0.3771	0.5477	0.3978	0.5421	0.629	0.4221	0.4582	0.5023	0.6472	0.456	0.4651	0.3952	0.4921	0.6749	0.4383	0.879	0.7416	0.6472	0.5767	0.6566
IP6K2_64746_AD	0.4165	0.8443	0.3148	0.2681	0.6112	0.2863	0.1946	0.2246	0.428	0.3502	0.5751	0.1755	0.55	0.4759	0.5268	0.2283	0.5457	0.4571	0.1629	0.1806	0.7687	0.1708	0.2939	0.7361	0.1281	0.2661	0.1296	0.5052	0.2823	0.8059	0.2108	0.4717	0.3746	0.1633	0.3372	0.3774	0.4869	0.9635	0.8433	0.938	0.5848	0.9919	0.9408	0.9554	0.7916	0.9866	0.1552	0.8539	0.2444
IP6K2_64748_AD	0.6512	1	0.6184	0.8586	0.9695	0.8293	0.4829	0.8465	0.873	1	1	0.8156	1	0.909	0.8356	0.7311	1	0.7986	1	0.56	0.9324	0.484	0.8071	0.933	1	1	0.7765	0.8522	0.8022	1	0.8279	0.9141	0.8082	0.6424	0.7812	0.8953	1	1	1	0.9891	0.9292	0.9919	0.9863	0.9772	0.9904	1	0.5604	1	0.7257
IP6K2_64751_AA	0.4927	0.1613	0.7827	0.8015	0.3866	1	0.5522	0.8454	0.4877	1	0.6337	0.9379	0.7488	0.7359	0.7035	0.8913	0.6807	0.7977	1	0.8998	0.4492	0.9481	0.3528	0.2772	0.7624	0.9076	0.7066	0.8336	0.6712	0.7036	0.8289	0.7506	0.8197	1	0.6895	0.8534	0.8967	0.1565	0.1806	0.1895	0.6228	0.1976	0.1756	0.2544	0.4036	0.1979	1	0.3312	0.8677
IP6K2_64756_AD	0.051	0.2189	0.092	0.0752	0.1805	0.102	0.0287	0.0593	0.1031	0.0825	0.1067	0.0631	0.1198	0.1072	0.2147	0.1178	0.1176	0.1497	0.0299	0.1107	0.2495	0.0404	0.0282	0.2687	0.0523	0.0263	0.0221	0.2056	0.0467	0.4064	0.0449	0.1539	0.0889	0.0898	0.115	0.183	0.2688	0.3848	0.2259	0.4199	0.3072	0.6135	0.5443	0.4589	0.3876	0.675	0.045	0.3667	0.0546
WDR6_64795_AA	0.852788	1	1	0.6495	1	0.852788	1	1	1	0.852788	1	0.8049	0.852788	0.5047	0.852788	1	1	0.8888	1	0.4401	1	1	0.852788	1	0.852788	1	1	0.6576	0.6906	0.852788	0.5238	0.8694	1	1	1	0.9043	0.6587	0.852788	0.852788	1	1	0.6419	0.7557	0.6195	0.852788	0.8716	1	1	1
RBM5_64958_AD	0.8518	0.9246	0.7603	0.649	0.899	0.7326	0.7608	0.7173	0.833	0.637679	0.6151	0.759	0.6354	0.8213	0.7276	0.782	0.7428	0.6987	0.637679	0.6623	0.5238	0.7324	0.637679	0.7997	0.7707	0.4627	0.3359	0.5644	0.637679	0.7968	0.7113	0.672	0.5584	0.6683	0.5194	0.6222	0.6772	0.5907	0.7972	0.7906	0.6456	0.7934	0.6536	0.737	0.3789	0.7499	0.6772	0.5778	0.7577
HYAL3_64986_AA	0.771	1	0.8587	0.746	1	0.8692	1	0.7877	0.8996	0.7033	0.6518	0.778	1	0.8647	1	0.8996	0.4132	0.9528	1	0.9234	0.7762	1	0.829343	0.8696	0.6787	0.8868	0.829343	0.5923	0.8868	1	0.3721	0.8918	0.85	0.8289	0.732	1	0.7645	0.8545	1	0.8751	1	0.9234	0.7937	0.8674	1	0.8489	0.8318	0.8128	0.7135
NAT6_64989_AA	0.5999	0.706	0.7144	0.6426	0.5674	0.5078	0.5856	0.5557	0.5903	0.1692	0.6877	0.5205	0.6021	0.8776	0.4594	0.5411	0.844	0.6914	0.5752	0.7987	0.55	0.7317	0.3304	0.4593	0.6442	0.4048	0.5808	0.8761	0.6893	0.6064	0.6675	0.786	0.8276	0.9078	0.4804	0.7273	0.681	0.4642	0.7769	0.8534	0.6124	0.8563	0.8961	0.8176	0.7593	0.7446	0.9424	0.7151	0.6135
NAT6_64991_AA	0.14	0.3409	0.3817	0.1917	0.3409	0.233	0.257	0.2387	0.0984	0.1206	0.2952	0.5568	0.4807	0.336	0.1566	0.2558	0.4255	0.3024	0.2499	0.5525	0.306	0.1999	0.1225	0.2092	0.3426	0.2433	0.1952	0.2568	0.3226	0.4222	0.3719	0.2577	0.3847	0.3134	0.2915	0.5525	0.4998	0.2071	0.2052	0.2849	0.3266	0.4946	0.3742	0.346	0.6536	0.3993	0.4473	0.1999	0.2873
NPRL2_65041_AA	0.57	0.90256	1	1	1	0.6497	1	0.7837	1	0.90256	0.844	1	0.844	1	0.8982	0.8838	0.794	1	1	1	1	0.8974	0.90256	0.5796	0.9468	0.8677	0.8493	1	0.8443	1	1	0.9	0.8175	1	1	1	1	1	1	0.9112	1	0.8455	0.934	1	1	1	1	1	1
HEMK1_65085_AD	0.2529	0.1192	0.1308	0.2197	0.2025	0.134	0.2206	0.1368	0.1975	0.1447	0.1891	0.1989	0.0977	0.195	0.178	0.133	0.1457	0.2131	0.317	0.1671	0.3384	0.2819	0.1192	0.5437	0.205	0.1901	0.2487	0.2888	0.2713	0.1483	0.195	0.2287	0.1871	0.2888	0.1398	0.3357	0.194	0.174	0.3688	0.1014	0.1884	0.4131	0.8171	0.2036	0.5437	0.5607	0.2387	0.2258	0.1355
HEMK1_65086_AD	0.4272	0.595546	0.4583	0.683	0.7885	0.3737	0.7416	0.7489	0.4986	0.2929	0.6601	0.7322	0.1991	0.5848	0.443	0.5161	0.5904	0.4836	0.6011	0.627	0.6788	0.8782	0.5335	0.6607	0.7131	0.624	0.8454	0.7508	0.6482	0.6927	0.8086	0.7451	0.5137	0.6007	0.5986	0.7768	0.57	0.4104	0.541	0.5579	0.6982	0.4469	0.4272	0.5206	0.7322	0.7399	0.5828	0.5371	0.5776
HEMK1_65087_AD	0.7189	0.9186	0.8453	0.886	0.9377	0.8024	0.8999	0.9495	0.7964	0.7505	0.8938	0.9186	0.6929	0.8404	0.7964	0.8676	0.9041	0.7929	0.7476	0.8969	0.8302	0.9475	0.8816	0.7581	0.9003	0.8691	0.9312	0.8993	0.8321	0.9182	0.9454	0.9087	0.8186	0.7764	0.9072	0.8922	0.8522	0.7899	0.6792	0.9067	0.9115	0.5084	0.1203	0.833	0.7247	0.7452	0.8156	0.8265	0.8922
HEMK1_65088_AD	1	0.785045	0.5935	0.7852	0.6783	1	1	1	0.7376	0.785045	0.817	1	1	0.705	0.6922	0.5526	1	0.5571	1	0.7436	1	0.803	0.5907	0.6314	0.3599	1	0.7596	0.8739	0.7612	1	0.705	0.4696	0.705	1	1	0.7974	1	1	0.7577	1	0.7299	1	0.537	0.7205	0.7557	0.8343	0.7643	0.496	1
HEMK1_65089_AD	1	0.8716	0.8495	0.8997	0.8578	1	1	1	0.8752	0.7388	0.935	1	1	0.8415	0.8906	0.8424	1	0.7833	1	0.9087	1	0.9083	0.8693	0.6562	0.5811	1	0.8251	0.9433	0.8585	1	0.8628	0.7134	0.8671	1	1	0.9095	1	1	0.7847	1	0.8846	1	0.893702	0.905	0.6766	0.7922	0.8681	0.7533	1
TEX264_65099_AD	0.7347	0.7096	1	0.7752	1	1	1	1	1	1	0.743	1	0.8584	0.699	1	1	0.6849	1	1	1	0.8202	0.6258	0.875	1	0.9022	0.5784	0.7793	0.7121	0.761	0.8283	1	0.8827	0.7989	1	0.7112	0.7345	1	1	0.8939	0.8366	1	0.8699	1	1	0.8755	1	0.8155	0.818	1
TEX264_65100_AD	0.8299	1	1	1	0.6628	1	1	0.8026	1	1	1	0.8479	1	0.853	1	1	1	1	1	1	0.784	0.7359	1	1	1	1	1	1	0.8882	0.7933	1	0.8664	1	1	1	0.8267	1	1	1	0.803	0.8534	0.8569	1	1	1	1	0.7924	1	1
PARP3_65117_AA	0.3811	0.3215	0.3989	0.5615	0.2842	0.1955	0.4056	0.5034	0.2474	0.473	0.2614	0.3077	0.3813	0.2483	0.2873	0.2721	0.6658	0.3804	0.388034	0.5003	0.3821	0.2923	0.4156	0.3846	0.5578	0.5472	0.388034	0.3651	0.2398	0.5016	0.3405	0.3677	0.4728	0.7447	0.439	0.1875	0.4579	0.3821	0.3502	0.3232	0.4339	0.277	0.397	0.4031	0.388034	0.5201	0.5011	0.4129	0.2746
PCBP4_65133_AD	0.1447	0.1587	0.2222	0.2588	0.2878	0.1732	0.3613	0.24032	0.3656	0.24032	0.1358	0.44	0.2391	0.198	0.3438	0.2249	0.1054	0.4181	0.24032	0.3346	0.043	0.4142	0.24032	0.2157	0.2643	0.1358	0.3438	0.186	0.2683	0.24032	0.3204	0.2953	0.2953	0.43	0.2529	0.1957	0.2857	0.0948	0.3099	0.299	0.3548	0.2466	0.3204	0.2391	0.2391	0.4759	0.4121	0.4681	0.2009
CCDC66_65346_AD	1	0.9114	0.6814	0.8727	0.7277	1	0.9476	0.7669	0.8605	0.852	0.7809	0.7422	0.7933	0.6906	0.7592	0.8389	0.6574	0.8233	0.78147	0.7351	0.7669	0.8254	1	0.8916	0.751	0.6219	0.78147	0.5324	0.78147	0.8044	0.78147	0.6834	0.7809	0.6868	0.7775	0.8371	0.751	0.9201	0.852	0.8044	0.8564	0.6345	0.8457	0.8095	0.5523	0.9005	0.6323	0.812	0.8916
RPP14_65434_AD	0.8354	0.9227	0.7402	0.846	0.8493	0.5407	0.7208	0.6329	0.6949	0.757	0.5834	0.4837	0.7147	0.4676	0.6181	0.2689	0.3476	0.7711	0.676542	0.4972	0.2394	0.8162	0.6966	0.8212	0.5515	0.8523	1	0.8586	0.676542	0.5485	0.587	0.5531	0.691	0.5208	0.5792	0.6137	0.7243	0.6567	0.4959	0.7416	0.7	0.6251	0.6102	0.749	1	0.6854	0.3663	0.7132	0.7958
DHFRL1_65705_AD	0.78	0.646	0.8622	0.8697	0.7254	0.6964	0.7145	0.7275	0.9236	1	0.7637	1	1	0.8975	0.6473	0.7095	0.7145	0.656	1	0.8391	0.6524	0.8391	0.5104	0.8622	0.7577	1	1	0.9224	0.807326	0.807326	0.6438	0.7694	1	0.6964	0.6252	0.8117	0.8622	0.6574	0.5558	1	0.9156	0.9211	0.6347	0.9236	1	0.7254	0.8825	0.8117	0.7577
BOC_66196_AD	0.511518	0.4586	0.6567	0.5175	0.3235	0.7281	0.7051	0.4889	0.401	0.6703	0.5893	0.8056	0.4373	0.4889	0.5223	0.5246	0.5543	0.5825	0.511518	0.6906	0.4889	0.3894	0.5167	0.6567	0.3235	0.7663	0.511518	0.5139	0.3378	0.511518	0.5605	0.4667	0.5981	0.5344	0.5605	0.4738	0.4291	0.6567	0.5344	0.511518	0.3534	0.4532	0.7493	0.3967	0.511518	0.5183	0.5416	0.6906	0.2826
ADPRH_66336_AD	0.294	0.2098	0.2013	0.4165	0.2154	0.4412	0.3739	0.3635	0.4226	0.371394	0.1288	0.371394	0.371394	0.1157	0.2827	0.371394	0.2439	0.2684	0.371394	0.2726	0.371394	0.0864	0.2093	0.371394	0.3074	0.371394	0.371394	0.4464	1	0.371394	0.5474	0.0817	0.371394	0.3315	0.1834	0.1602	0.2726	0.4431	0.1589	0.371394	0.371394	0.2882	0.3807	0.2011	0.371394	0.4884	0.5266	0.5575	0.371394
POPDC2_66348_AD	0.7995	0.7546	0.8601	0.7757	0.5665	0.8737	0.7578	0.729	0.9226	1	0.8014	0.7368	0.8831	0.9154	0.8631	0.7757	0.9269	0.7872	0.9621	0.8795	0.7163	0.8907	0.9022	0.7192	0.8058	0.8176	0.7656	0.8984	0.7919	0.8737	0.8367	0.6686	0.8874	0.65	0.7757	0.8433	0.7578	0.8614	0.8433	0.7703	0.6788	0.752	0.8459	0.7498	0.7141	0.8196	0.7981	0.6577	0.4772
CCDC14_66491_AD	0.4939	0.2992	0.3693	0.2697	0.5404	0.445	0.3814	0.618	0.4577	0.1366	0.2504	0.498	0.1691	0.3543	0.4315	0.5223	0.55	0.2732	0.28815	0.4045	0.3	0.3939	0.0733	0.2685	0.1861	0.0148	0.28815	0.1657	0.28815	0.2767	0.3328	0.2706	0.2128	0.3141	0.3672	0.2455	0.4957	0.4434	0.2229	0.3793	0.2207	0.3088	0.4428	0.4887	0.0535	0.3914	0.356	0.435	0.2959
CCDC14_66492_AD	1	1	1	0.4814	0.8298	1	1	1	1	1	0.6655	1	1	0.8274	0.7955	1	0.7445	1	0.793506	0.8745	1	1	0.793506	1	0.5854	0.793506	0.793506	1	0.793506	1	1	1	1	1	1	1	0.9281	1	0.265	1	0.7091	0.8356	0.7652	1	1	0.7105	1	0.566	0.6916
MGLL_66626_AD	0.2433	1	0.2584	0.4077	0.2342	0.0167	0.2342	0.1922	0.3465	0.2897	0.2721	0.1694	1	0.484	0.6047	0.2489	0.263	0.2537	0.287773	0.0599	0.2275	0.4921	0.4729	0.1472	0.189	0.1694	0.287773	0.2518	0.287773	0.1551	0.2793	0.1866	0.1403	0.2168	0.2537	0.3048	0.2685	0.2342	0.2721	0.2721	0.4785	0.2699	0.2138	0.2489	0.3145	0.3377	0.5965	0.1301	0.1922
TMEM108_66830_AA	0.617985	0.6016	0.6828	0.401	0.8516	0.617985	0.5754	0.4059	0.7928	0.7132	0.7781	0.4435	0.6326	0.7857	0.617985	0.7356	0.6145	0.4626	0.617985	0.4889	0.4829	0.6688	0.617985	0.4595	0.6567	0.54	0.617985	0.7928	0.6368	0.8115	0.5893	0.5596	0.6485	0.4556	0.6779	0.6297	0.6862	0.6387	0.5202	0.6828	0.7184	0.5549	0.6234	0.5274	0.617985	0.5691	0.6437	0.3601	0.6145
CDV3_66839_AA	0.5368	0.5747	0.6651	0.5812	0.4848	0.4663	0.526	0.4121	0.4405	0.7284	0.5252	0.3901	0.5369	0.3952	0.6787	0.5605	0.3236	0.6591	0.5197	0.6016	0.5182	0.4873	0.3012	0.458	0.5046	0.3579	0.4573	0.4728	0.4763	0.2549	0.6217	0.648	0.6126	0.5025	0.6303	0.7319	0.491	0.1225	0.6782	0.7965	0.587	0.7472	0.5593	0.4305	0.8102	0.7046	0.6396	0.4972	0.4667
CDV3_66842_AA	0.3664	0.3461	0.3697	0.3248	0.2831	0.32	0.3274	0.2657	0.3181	0.4733	0.2712	0.3282	0.2539	0.2821	0.4292	0.3185	0.143	0.3556	0.38	0.3008	0.3523	0.3545	0.2331	0.2947	0.3623	0.1896	0.4883	0.2621	0.4173	0.2003	0.3065	0.2994	0.3223	0.3205	0.3142	0.383	0.3408	0.0534	0.3199	0.3892	0.3622	0.3329	0.3105	0.2268	0.2583	0.3258	0.3505	0.2491	0.2452
SLC35G2_66939_AD	0.6368	0.7802	0.5984	0.7989	0.7568	0.6334	0.8111	0.6716	1	0.5261	0.6778	0.6368	0.8897	0.8201	0.746	1	0.6778	0.8804	0.74943	0.6866	0.6501	0.7643	0.63	0.8648	0.745	0.6585	1	0.8792	0.7542	0.6778	0.6909	0.6866	0.7372	0.6289	0.6544	0.8003	0.6368	0.8215	0.8238	0.6368	1	0.7372	0.7322	0.63	0.7372	0.8402	0.7691	0.8282	0.7593
U2SURP_67126_AD	0.557	0.4251	0.5453	0.4839	0.4765	0.4532	0.5371	0.4597	0.4433	0.4362	0.4916	0.392	0.5417	0.4119	0.3632	0.4844	0.4916	0.5998	0.476858	0.4916	0.4604	0.3868	0.7437	0.5154	0.4653	0.4532	0.476858	0.4689	0.476858	0.0882	0.5781	0.4622	0.4916	0.381	0.4433	0.4488	0.3576	0.3259	0.4532	0.5417	0.4336	0.4699	0.481	0.3205	0.6171	0.5199	0.5752	0.3306	0.3607
LEKR1_67374_AD	0.7314	0.7648	0.7432	0.6287	0.4693	0.5173	0.8816	0.7262	0.8794	0.4511	0.6001	0.5354	0.5064	0.807	0.3709	0.4287	0.7796	0.6872	1	1	1	0.7919	0.8479	0.6365	0.8344	0.7658	0.5045	0.9676	0.855	0.6457	0.9011	0.7432	0.6764	0.7687	0.8283	0.933	0.6872	0.8692	0.7022	0.6317	0.5001	0.8692	0.6883	0.8283	1	0.8251	1	1	0.8344
CCNL1_67385_AD	0.579465	0.7297	0.6618	0.5274	0.7084	0.8613	0.4879	0.7954	0.7641	0.8832	0.6247	0.5682	0.6539	0.584	0.5975	0.6742	0.6183	0.6064	0.579465	0.6461	0.5429	0.6121	0.579465	0.4928	0.5076	0.4138	0.5975	0.5349	0.2358	0.5192	0.4779	0.6047	0.5975	0.6492	0.4572	0.4781	0.4388	0.6937	0.3759	0.7737	0.693	0.7348	0.5563	0.6405	0.6428	0.5753	0.5289	0.7261	0.7481
MLF1_67444_AD	0.3182	0.4229	0.4062	0.5396	0.5455	0.6087	0.4138	0.5	0.4494	0.3662	0.2863	0.2841	0.2703	0.31	0.2059	0.2446	0.2651	0.3251	0.5455	0.5867	0.353665	0.3177	0.276	0.428	0.2353	0.4706	0.353665	0.521	0	0.2222	0.2857	0.4489	0.4404	0.3377	0.35	0.3941	0.2004	0.3836	0.2794	0.0769	0.4021	0.4	0.1863	0.4024	0.353665	0.5361	0.3636	0.1649	0.2953
RPL22L1_67619_AA	0.239	0.3483	0.5935	0.3809	0.6117	0.203	0.3862	0.6323	0.4926	0.4012	0.4189	0.5007	0.4845	0.5867	0.6597	0.5147	0.2902	0.4631	0.163	0.3722	0.3591	0.4109	0.3868	0.4234	0.2954	0.4763	0.4418	0.5888	0.394	0.1453	0.5501	0.5838	0.3621	0.5249	0.4308	0.3322	0.339	0.3692	0.4291	0.4868	0.4648	0.4082	0.5078	0.6301	0.6837	0.463	0.3999	0.4059	0.5519
ZMAT3_67676_AA	0.1651	0.3767	0.392	0.3433	0.3259	0.3792	0.3544	0.2684	0.2789	0.5371	0.3849	0.3607	0.5211	0.293	0.4391	0.335	0.3424	0.4204	0.373819	0.392	0.3119	0.2165	0.373819	0.4781	0.4532	0.373819	0.373819	0.2165	0.7719	0.373819	0.4362	0.5194	0.2438	0.2353	0.4916	0.293	0.3259	0.3259	0.4174	0.6929	0.4149	0.3472	0.4141	0.5229	0.373819	0.2848	0.3993	0.3846	0.3329
TTC14_67731_AD	0	0	0.4604	0.1054	0.265724	0.1406	0.5161	0.1495	0	0.265724	0.1094	0.7768	0.265724	0.3361	0.0759	0.2847	0.265724	0.0907	0.265724	0.4074	0.265724	0.5681	0.265724	0.2015	0.3821	0.2214	0.4016	0.1244	0.1	0.265724	0.153	0.3985	0.1818	0.4116	0.396	0.4042	0.2677	0.147	0.1961	0.3023	0.1909	0.2383	0.2198	0.5793	1	0.7118	0.7429	0	0.265724
ABCC5_67824_AD	0.5709	0.8283	0.90672	0.7606	0.90672	1	1	0.6563	1	0.90672	0.4255	0.3982	0.6182	1	1	1	1	1	0.90672	1	0.5717	1	1	0.6281	1	1	1	1	0.90672	1	1	1	1	0.90672	1	1	1	0.7196	1	1	1	1	1	0.6392	1	0.8551	1	1	1
NCBP2_68267_AD	0.8297	0.7297	1	0.8677	0.7514	0.7743	0.8776	0.775	0.9516	0.8873	0.8626	0.7557	0.894	0.7439	0.7714	0.8124	0.6631	1	0.6922	0.8083	0.7074	0.7528	0.6042	0.6488	1	0.8227	1	0.9489	0.5076	0.6922	0.7915	0.6666	0.8297	0.7819	0.803	0.8861	0.827	1	0.9466	1	0.8395	0.8896	0.7205	0.7852	1	0.9422	0.8083	0.827	0.8474
NCBP2_68268_AD	0.4764	0.6224	0.4406	0.4018	0.3768	0.4214	0.461	0.3993	0.575	0.2879	0.5027	0.452	0.4812	0.5475	0.4802	0.526	0.3692	0.5959	0.5524	0.523	0.2948	0.5084	0.4037	0.3714	0.5483	0.4405	0.5738	0.587	0.4059	0.3678	0.4682	0.4054	0.5123	0.5811	0.4878	0.5694	0.589	0.6293	0.4027	0.5775	0.5784	0.5077	0.5632	0.5233	0.4309	0.475	0.4495	0.5981	0.5987
NCBP2_68269_AD	0.2963	0.4721	0	0.1435	0.2407	0.3907	0.1598	0.2708	0.1333	0.0518	0.2039	0.2566	0.1749	0.3484	0.3369	0.243	0.2877	0	0.256565	0.3254	0.2544	0.3473	0.4079	0.4021	0	0.1567	0.256565	0.1082	0.6528	0.4832	0.3022	0.2995	0.2204	0.3286	0.1826	0.1832	0.3638	0	0.0807	0	0.2964	0.1301	0.362	0.2882	0.256565	0.1326	0.2121	0.3148	0.2627
DLG1_68296_AD	0.8057	0.952	0.7741	0.8242	1	0.701	0.8418	0.8395	0.8523	0.906406	0.8204	1	1	1	0.8371	1	0.4741	1	0.906406	0.701	1	0.4387	1	1	1	0.906406	0.906406	1	0.906406	1	0.7911	0.8395	1	0.906406	0.906406	1	1	0.701	1	1	0.7987	0.7485	1	1	1	1	1	0.9019	0.9084
PIGG_68360_AD	0.5434	0.7348	0.6077	0.6157	0.630927	0.8657	0.6869	0.4861	0.8413	0.630927	0.4412	0.5476	0.5726	0.6021	0.7458	0.4662	0.714	0.6661	0.630927	0.6303	0.4647	0.6032	0.9184	0.5496	0.5051	0.2138	0.630927	0.2546	0.630927	0.630927	0.6447	0.3119	0.630927	0.630927	0.6133	0.527	0.4717	0.5665	0.5912	0.8962	0.6014	0.5274	0.242	0.7449	0.3323	0.4733	0.7902	0.7053	0.630927
MYL5_68385_AD	0.8694	0.8392	1	0.8753	0.8181	0.6644	0.8239	1	1	0.868208	0.812	0.8663	1	0.9351	0.848	1	0.8293	0.8871	0.8595	1	1	0.854	0.5901	1	1	0.7537	0.6923	0.852	0.9265	1	1	0.9051	1	0.9547	0.9	0.8819	0.9523	0.6644	0.7058	0.9051	0.8392	1	1	1	0.8895	0.8762	0.9531	1	1
PCGF3_68406_AA	0.0767	0.0386	0.1691	0.2026	0.1092	0.1671	0.154	0.2449	0.0372	0.0934	0.2353	0.5079	0.1219	0.2474	0.1083	0.2167	0.0738	0.2728	0.2475	0.528	0.1958	0.3333	0.1873	0.2274	0.3644	0.1508	0	0.3222	0.0829	0.4738	0.3251	0.2766	0.1648	0.3057	0.2028	0.2608	0.5977	0.3452	0.4298	0.3859	0.2761	0.4412	0.6239	0.5094	0.7187	0.5908	0.5639	0.0874	0.1182
WHSC1_68528_AA	0.2718	0.0664	0.1705	0.067	0.0836	0.0278	0.1222	0.1	0.1642	0.093	0.1556	0.1176	0.0974	0.3697	0.1036	0.1	0.0782	0.1837	0.152497	0.0977	0.0667	0.1509	0.106	0.0897	0.1398	0.1781	0.0164	0.359	0.25	0.1589	0.216	0.24	0.0426	0.0816	0.1916	0.2137	0.2814	0.2703	0.0779	0.3902	0.0732	0.2633	0.4037	0.1176	0.5161	0.2222	0.2596	0.0787	0.1964
HAUS3_68551_AD	1	1	1	0.7658	1	0.8674	1	0.8897	1	0.928875	1	1	1	0.8327	1	1	1	0.8828	0.928875	1	1	1	0.7733	1	0.8406	1	1	1	1	0.901	1	0.8338	1	1	1	1	1	0.8908	1	1	1	1	1	1	1	0.9066	0.7535	0.9252	1
SORCS2_68737_AD	0.510015	0.4944	0.510015	0.4887	0.6165	0.3648	0.5038	0.4216	0.4944	0.510015	0.4268	0.4866	0.3935	0.7437	0.4037	0.5752	0.5611	0.4696	0.2529	0.545	0.4783	0.4607	0.6105	0.5525	0.5946	0.7529	0.8257	0.8257	0.510015	0.510015	0.510015	0.4719	0.6061	0.5301	0.5166	0.510015	0.4341	0.4849	0.5423	0.4293	0.4149	0.4142	0.5611	0.6929	0.510015	0.443	0.4449	0.5021	0.709
SH3TC1_68762_AA	0.3105	0.4256	0.4738	0.5564	1	0.509985	0.5785	0.6069	0.4738	0.509985	0.6363	0.3982	0.6197	0.6317	0.5785	0.4706	0.7201	0.5914	0.509985	0.6862	0.3233	0.8046	0.4809	0.6069	0.5757	0.6536	0.509985	0.5223	0.3915	0.2785	0.6536	0.5072	0.5366	0.4738	0.6363	0.2836	0.586	0.6069	0.3861	0.6317	0.673	0.4069	0.4617	0.4617	0.509985	0.3544	0.5072	0.2785	0.6984
TRMT44_68772_AA	0.6617	0.8144	0.5563	0.8081	0.6286	0.7189	0.7119	0.479	0.9377	1	0.8404	1	0.7097	0.6007	0.637	0.8017	0.697941	0.4744	0.697941	0.7043	0.9003	0.7783	0.5563	0.5375	0.9186	0.8826	0.6007	0.637	0.8404	0.697941	0.8186	0.5063	0.9003	0.8404	0.5796	0.5632	0.6286	0.8186	0.5752	0.8575	0.9377	0.6197	0.7247	0.6197	0.697941	0.7617	0.6824	0.7719	0.7899
LDB2_68840_AA	0.3433	0.2054	0.5131	0.1439	0.3775	0.5043	0.1436	0.1602	0	0.5598	0.5373	0.4802	0.2426	0.3308	0.1094	0.2362	0.5427	0.2585	0.2412	0.3974	0	0.2234	0.0897	0.4101	0.5598	0.3476	0.311265	0.3863	0	0.3775	0.3861	0.1965	0.3818	0.6561	0	0.3309	0.6642	0.1829	0.1914	0.4739	0.0683	0.45	0.2407	0.1334	0.6642	0.1152	0.1922	0.467	0.3834
LDB2_68847_AD	0.7736	0.6954	0.8789	0.6274	0.6607	0.5098	0.6244	0.8194	0.7024	0.6229	0.5648	0.6839	0.6702	0.7887	0.7626	0.8685	0.7352	0.6733	0.709226	0.827	0.6392	0.7754	0.7876	0.711	0.4362	0.7108	0.709226	0.7374	0.6607	0.5848	0.7326	0.7493	0.6264	0.6754	0.7101	0.6456	0.513	0.6266	0.7136	0.7058	0.7837	0.5805	0.6844	0.7513	0.6161	0.7772	0.6376	0.7533	0.6995
PACRGL_68920_AD	0.8321	0.9456	0.9504	0.7522	0.7814	0.9298	0.7999	0.6436	0.9141	1	0.747	0.5091	0.6327	0.8711	0.7809	0.6644	0.8784	0.8802	0.831257	0.7	0.8202	0.8967	0.8235	0.8403	0.8331	0.9423	0.9032	0.6981	0.9189	1	0.7513	0.8499	0.8466	0.948	0.9156	0.9691	0.5879	0.7448	0.8209	1	0.8558	0.8453	0.8764	0.9075	0.5192	0.6868	0.8521	0.8617	0.7596
PACRGL_68924_AD	0.5327	0.8492	0.901	0.7477	1	0.805	0.9005	0.7468	0.9083	1	0.7608	0.5492	0.542	0.6839	0.5519	0.7502	0.7672	0.7709	0.77478	0.7515	1	0.8105	0.837	0.8881	0.8368	1	0.8149	0.6824	1	0.6301	0.8464	0.7842	0.7706	1	0.8363	0.9071	0.6483	0.903	0.6723	0.7138	0.8467	0.9372	0.9096	0.8774	0.4858	0.844	0.8421	0.8838	0.8246
RBPJ_68986_AD	1	0.9061	0.7247	0.7038	1	0.8143	0.6619	0.6362	0.6318	0.801705	0.4936	0.7192	0.8733	0.7764	0.8019	0.5713	0.5523	1	0.801705	0.8728	0.6419	0.7709	0.6997	1	0.5058	0.801705	0.801705	0.6902	0.801705	1	0.801705	0.6442	1	0.6012	0.6793	0.7264	0.6728	1	0.694	1	1	0.7277	0.8085	1	0.801705	0.2972	1	0.7957	1
APBB2_69102_AA	0.6862	0.4985	0.853	0.6813	0.4916	0.6445	0.5919	0.7742	0.6524	0.7437	0.6712	0.8073	0.5473	0.4699	0.4204	0.6738	0.6171	0.6893	0.61202	0.6031	0.6394	0.4653	0.7875	0.6043	0.5632	0.9141	0.61202	0.4755	0.61202	0.78	0.4085	0.4794	0.7154	0.5473	0.392	0.6196	0.2789	0.8186	0.7027	0.61202	0.6031	0.5134	0.4916	0.5675	0.61202	0.6097	0.392	0.5985	0.6061
OCIAD1_69233_AD	0	0.2172	0.2879	0	0	0.1483	0.0864	0.1223	0	0.0993	0	0.0842	0	0.2536	0.2187	0.1772	0.1307	0.3061	0.162665	0	0.3686	0.0828	0.0066	0.1296	0.2029	0.1939	0.1629	0	0	0.162665	0.2842	0.1667	0.1104	0.0828	0.1204	0.1486	0.2312	0.3504	0.137	0.2272	0.196	0.2645	0.3398	0.2363	0.1691	0.5387	0.1153	0.0893	0.3142
OCIAD1_69238_AD	0.4529	0.4297	0.6629	0.3185	0.4283	0.1797	0.4592	0.4542	0.5862	0.4455	0.6356	0.3143	0.2591	0.6706	0.3161	0.3833	0.7537	0.7109	0.513809	0.4004	0.5578	0.4908	0.3475	0.1467	0.2795	0.4828	0.4644	0.6802	0.3453	0.3937	0.7202	0.5754	0.4825	0.7043	0.5295	0.6155	0.5175	0.4537	0.2993	0.4452	0.5756	0.5247	0.5712	0.4551	0.4789	0.837	0.592	0.6154	0.7418
DCUN1D4_69271_AD	0.0214	0.157	0.451	0.1224	0.3869	0.1646	0.2407	0.1102	0.0596	0.0357	0.1714	0.3259	0.249	0.295	0.188	0.3048	0.0416	0.1557	0.270337	0.2922	0.1624	0.549	0.1013	0.134	0.4158	0.4152	0.5036	0.4415	0.270337	0.2592	0.6289	0.3218	0.1882	0.4217	0.2487	0.1426	0.3633	0.2903	0.0937	0.4087	0.2258	0.3839	0.5299	0.3385	0.5876	0.3704	0.3977	0.1508	0.2181
HOPX_69373_AD	0.1633	0.365593	0.365593	0.4	0.365593	0.365593	0.087	0.4643	0.365593	0.365593	0.365593	0.2941	0.1667	0.365593	0.2602	0.4143	0.4	0.3478	0.4169	0.2013	0.3393	0.365593	0.365593	0.3665	0.5263	0.4303	0.44	0.1231	0.1538	0.3182	0.2733	0.3678	0.365593	0.3	0.4356	0.383	0.2236	0.2571	0.3471	0.194	0.365593	0.2833	0.2716	0.2979	0.365593	0.3134	0.2817	0.697	0.5307
GRSF1_69454_AD	0.5172	0.4749	0.5784	0.4577	0.5326	0.3877	0.3761	0.5963	0.5404	0.5205	0.3877	0.4871	0.1444	0.4577	0.4699	0.3454	0.5256	0.7402	0.513877	0.5351	0.4418	0.5184	0.5446	0.5587	0.3601	0.5032	0.513877	0.5372	0.513877	0.8351	0.5205	0.5587	0.4317	0.4699	0.513877	0.628	0.6059	0.6128	0.7402	0.6551	0.3362	0.5134	0.5256	0.6454	0.513877	0.6031	0.4577	0.695	0.4699
COX18_69476_AA	0.2438	0.4788	0.2973	0.3006	0.3053	0.134	0.1947	0.311	0.2517	0.1078	0.1078	0.2529	0.293	0.2973	0.3386	0.2567	0.4916	0.3534	0.324213	0.2789	0.5101	0.2529	0.1691	0.0843	0.4678	0.2872	0.324213	0.1621	0.324213	0.3006	0.2789	0.3823	0.4916	0.4085	0.4362	0.4085	0.2438	0.456	0.205	0.3672	0.6074	0.2661	0.3731	0.2826	0.324213	0.2066	0.3403	0.3024	0.1769
COX18_69479_AA	0.3104	0.0873	0.2274	0.2711	0.264	0.2418	0.0835	0.2597	0.0961	0	0.1202	0.212175	0.2907	0.2069	0.2301	0.2689	0.223	0.3086	0.212175	0.212175	0.2983	0.5344	0.0399	0.3498	0.193	0.212175	0.212175	0.347	0.212175	0.223	0.212175	0.347	0.2418	0.4335	0.1068	0.3235	0.0961	0.303	0.1228	0.212175	0.0685	0.3894	0.5893	0.2274	0.212175	0.3235	0.1808	0.1312	0.0961
TMEM150C_69714_AD	0.9146	0.923	0.7184	0.8212	1	0.905639	1	1	0.8596	1	0.8909	1	0.7683	0.869	0.8212	1	1	0.8056	0.905639	1	1	1	0.829	1	0.6238	0.4833	0.905639	0.8809	0.905639	1	1	1	0.905639	0.905639	1	0.8893	0.7683	1	0.8993	1	0.905639	1	1	1	0.905639	0.6238	1	0.4889	0.905639
SEC31A_69735_AD	0.095	0.1073	0.2269	0.1818	0.1943	0.1035	0.0998	0.1595	0.0712	0.1568	0.1191	0.2938	0.2253	0.1776	0.1613	0.1195	0.2012	0.1702	0.6603	0.1329	0.1405	0.3013	0.2191	0.1516	0.1766	0.4271	0.4917	0.3054	0.6023	0.1736	0.2255	0.1817	0.1581	0.242	0.1938	0.2386	0.2208	0.1828	0.2598	0.3163	0.1671	0.213	0.1997	0.1643	0.6389	0.2507	0.2606	0.0882	0.1135
LIN54_69760_AD	0.9255	0.7308	0.7962	0.5017	0.6213	0.8736	0.5753	0.7358	0.8362	0.7009	0.6684	0.5477	0.426	0.5395	0.607	0.6566	0.8746	0.5991	0.696485	0.6926	0.7664	0.5172	0.3771	0.7639	0.7621	0.696485	0.696485	0.696485	0.696485	0.3864	0.9143	0.5898	0.6658	0.7044	0.6591	0.6279	0.7808	0.8323	0.6537	0.5395	0.7552	0.6279	0.6722	0.8084	1	0.8472	0.512	0.7483	0.55
MAPK10_69827_AD	0.4209	0.4404	0.3534	0.4195	0.5344	0.504266	0.3705	0.455	0.3999	0.504266	0.3913	0.6966	0.6451	0.6297	0.3975	0.4626	0.5344	0.4889	0.504266	0.3042	0.5605	0.3507	0.4154	0.505	0.5344	0.5223	0.504266	0.4665	0.3147	0.504266	0.4889	0.4123	0.1727	0.504266	0.3961	0.3646	0.6048	0.4787	0.3894	0.504266	0.5725	0.4123	0.4078	0.556	0.7281	0.546	0.223	0.505	0.6048
FAM13A_69912_AA	0.6299	0.6552	0.3942	0.3292	0.3931	0.0988	0.5621	0.15	0.5496	0.4583	0.4582	0.2883	0.5586	0.4515	0.5401	0.3327	0.415	0.6747	0.321557	0.162	0.0771	0.1114	0.5535	0.2361	0.3757	0.5563	0.321557	0.6007	0.321557	0.2895	0.1671	0.5111	0.433	0.2005	0.3006	0.6859	0.2659	0.2395	0.383	0.5252	0.2061	0.0771	0.3765	0.2542	0.321557	0.4357	0.059	0.2672	0.4074
SNCA_69932_AD	0.4433	0.3233	0.5008	0.4758	0.275506	0.275506	0.275506	0.0309	0.275506	0.275506	0.3522	0.275506	0.2438	0.3867	0.113	0.2031	0.7414	0.2177	0.275506	0.1374	0.1604	0.2734	0.3361	0.1556	0.0309	0.3007	0.275506	0.275506	0.2416	0.275506	0.2765	0.1699	0.1725	0.275506	0.275506	0.2765	0.2827	0.1407	0.3386	0.3233	0.4408	0.275506	0.2765	0.4175	0.3644	0.1769	0.3445	0.3144	0.3007
SMARCAD1_69963_AA	0.6519	0.338	0.4282	0.7573	0.3188	0.5489	0.404	0.4946	0.4835	0.489002	0.4573	0.621	0.3655	0.6519	0.3485	0.5902	0.3597	0.4153	0.489002	0.6094	0.2378	0.5841	0.3597	0.4835	0.3669	0.7374	0.489002	0.4636	0.489002	0.6781	0.7892	0.4835	0.621	0.5953	0.5953	0.4213	0.513	0.6034	0.613	0.4835	0.513	0.4835	0.4125	0.4125	0.489002	0.5672	0.2863	0.3791	0.4431
RAP1GDS1_70002_AA	0.5828	0.2985	0.342641	0.22	0.401	0.392	0.3453	0.2087	0.4085	0.342641	0.3607	0.342641	0.4916	0.2438	0.2438	0.1214	0.342641	0.1621	0.342641	0.2321	0.6592	0.2733	0.097	0.3559	0.3559	0.3672	0.342641	0.342641	0.342641	0.2249	0.1947	0.4916	0.342641	0.3559	0.4916	0.342641	0.3259	0.2438	0.3453	0.342641	0.2545	0.3495	0.4417	0.1078	0.342641	0.4462	0.342641	0.2745	0.3731
TET2_70190_AD	0.3967	0.4214	0.779722	0.5664	1	0.3448	0.5694	0.7153	0.409	1	1	1	1	1	1	0.8102	0.3879	0.4853	0.779722	1	0.7103	1	0.441	0.7176	1	0.779722	0.779722	1	1	1	0.779722	1	1	1	1	1	1	0.779722	1	0.779722	0.4318	0.6161	1	0.5666	0.779722	0.6949	0.7044	0.6528	0.677
INTU_70537_AA	0.5453	0.3402	0.9502	0.5952	0.8943	0.7343	0.8165	0.7595	0.44	0.5055	0.6475	0.7995	0.8986	1	0.8364	0.944	0.805	0.7731	1	0.9094	0.6871	0.9637	0.3951	0.9041	0.8384	0.7692	1	0.9151	1	1	0.8606	0.856	0.7421	1	0.5628	0.8297	0.9009	0.7004	0.8536	0.9267	0.7601	0.9566	0.8749	0.8694	1	1	0.9539	0.7479	0.7361
ELF2_70614_AA	0.4308	0.4494	0.5716	0.5385	0.5634	0.6722	0.4341	0.5235	0.4151	0.3673	0.3309	0.6564	0.5489	0.2898	0.2265	0.6637	0.4956	0.3169	0.482049	0.6027	0.4599	0.6954	0.3164	0.6276	0.4645	0.3868	0.713	0.4074	0.5156	0.6149	0.3111	0.5988	0.427	0.5086	0.3261	0.4431	0.4458	0.3546	0.4007	0.4529	0.5034	0.4332	0.3927	0.5589	0.7029	0.4817	0.4213	0.3502	0.5867
IL15_70675_AA	0.8603	0.7229	0.785923	0.8752	0.8814	0.7276	0.8708	0.8173	0.7973	0.785923	0.743	0.897	0.8158	0.785923	0.7473	0.8458	0.9267	0.6815	0.785923	0.7308	0.8638	0.8429	0.6572	0.7567	0.8059	0.825	0.6035	0.8508	0.8951	0.7584	1	0.937	0.8354	1	0.6655	0.785923	0.6208	0.6205	0.8534	0.6165	0.7271	0.5346	0.6377	0.7749	0.785923	0.8705	0.785923	0.8739	0.589
IL15_70679_AD	0.7744	0.3722	0.484566	0.4361	0.3365	0.3763	0.686	0.4437	0.5462	0.484566	0.6226	0.522	0.5483	0.309	0.2453	0.3801	0.6849	0.6454	0.2263	0.4898	0.557	0.3843	0.4618	0.4461	0.2779	0.7301	0.5653	0.4951	0.5971	0.6101	0.3783	0.5098	0.4143	0.5786	0.2435	0.6172	0.7564	0.5685	0.4825	0.5019	0.5056	0.4178	0.4713	0.3307	0.484566	0.4912	0.3697	0.6232	0.8005
CDKN2AIP_71270_AD	0.687	0.4291	0.4965	0.5865	0.5521	0.8414	0.6666	0.6335	0.5608	0.5259	0.6494	0.5394	0.5942	0.4747	0.5814	0.65	0.6951	0.3359	0.573761	0.6666	0.4664	0.5696	0.4587	0.7171	0.6688	0.458	0.4365	0.3859	0.573761	0.535	0.5453	0.5571	0.8368	0.6104	0.673	0.4062	0.3911	0.5896	0.5161	0.5494	0.5845	0.5368	0.561	0.6757	0.4214	0.4854	0.5635	0.6714	0.7236
PRIMPOL_71310_AA	0.851575	0.9063	0.851575	0.8788	0.8713	0.851575	0.7946	0.7946	0.5919	0.851575	0.9263	0.9063	0.8286	0.6286	0.9355	0.8713	0.851575	0.9355	0.851575	0.7946	0.78	0.851575	0.8417	0.853	0.6851	0.851575	0.851575	0.9141	0.851575	0.8969	0.8855	0.7437	1	0.7437	0.851575	0.8286	0.8855	0.7303	0.8969	0.6851	0.8713	0.78	0.9427	0.9063	0.851575	0.9103	0.6803	1	0.9457
MRPL36_71493_AD	0.5743	0.5415	0.7432	0.6126	0.5548	0.3566	0.4149	0.42	0.2355	0.4879	0.3661	0.4224	0.5693	0.5353	0.4116	0.387	0.7084	0.2874	0.7419	0.5282	0.4807	0.5853	0.4862	0.6067	0.4835	0.7093	0.4457	0.6756	0.2791	0.6197	0.4438	0.7073	0.6069	0.5749	0.5452	0.431	0.7291	0.6202	0.7151	0.6292	0.8135	0.3954	0.5844	0.5174	0.6989	0.6134	0.6582	0.4461	0.4902
FASTKD3_71526_AA	0.312	0.4172	0.24	0.2897	0.3323	0.3249	0.2963	0.3656	0.4571	0.3683	0.2554	0.3629	0.3472	0.3249	0.346	0.5427	0.3982	0.4478	0.4571	0.4643	0.501	0.3422	0.2963	0.4124	0.3049	0.2257	0.3667	0.5128	0.2768	0.3133	0.5	0.4154	0.2429	0.5411	0.2857	0.3468	0.3333	0.3569	0.3736	0.3982	0.525	0.4571	0.4438	0.4771	0.6069	0.3942	0.3728	0.1972	0.3249
OSMR_71851_AD	0.707968	1	0.707968	0.8832	0.5221	0.9603	0.6021	0.5173	0.7516	0.707968	0.7408	0.3798	1	0.6021	0.707968	0.5751	0.831	0.5577	0.707968	0.5918	0.7707	0.6686	0.6941	0.9339	0.6819	0.7909	0.735	1	0.707968	0.7909	0.581	0.8443	0.649	1	0.5493	0.735	0.7305	0.6941	0.4873	1	0.8882	0.6383	0.7277	0.3866	0.707968	0.7394	0.5276	0.608	0.6686
PAIP1_71962_AD	0.5027	0.4037	0.2348	0.4193	0.2822	0.4482	0.3988	0.3457	0.3986	0.3733	0.3566	0.4744	0.3325	0.3872	0.3666	0.3605	0.3079	0.4482	0.2529	0.2401	0.311	0.4622	0.3872	0.4769	0.3894	0.3007	0.3292	0.3786	0.4572	0.3872	0.3013	0.4884	0.4094	0.3647	0.4616	0.5061	0.3697	0.4218	0.4423	0.3644	0.2934	0.4201	0.3665	0.3635	0.3513	0.3841	0.3564	0.4056	0.3547
CCNO_72031_AD	0.7033	0.6947	0.518	0.7114	0.6621	0.6928	0.6843	0.6744	0.4621	0.6657	0.6047	0.7417	0.7654	0.6665	0.8099	0.6872	0.8622	0.6853	0.5252	0.7462	0.5704	0.8462	0.6369	0.5404	0.8314	0.3735	0.4929	0.921	0.4841	0.8585	0.6614	0.5907	0.7333	0.5252	0.5912	0.6978	0.8491	0.6967	0.676	0.5857	0.6338	0.7221	0.624	0.6818	0.7061	0.6931	0.7762	0.6431	0.6997
MIER3_72120_AA	0.7154	0.7437	0.6394	0.4744	0.8186	0.7437	0.6989	0.7946	0.7861	0.733602	0.7371	0.6929	0.6031	0.6592	0.8061	0.7769	0.8286	0.6074	0.733602	0.7074	0.7206	0.6592	0.8131	0.858	0.7437	0.733602	0.733602	0.733602	0.733602	0.733602	0.6171	0.7586	1	0.6592	0.6592	0.6171	0.7437	0.6885	0.8764	0.733602	0.6031	0.6476	0.6592	0.6691	0.733602	0.7437	0.8097	0.7335	0.6171
KIF2A_72179_AD	0.7914	0.6508	1	0.7082	0.6799	0.666	0.7373	0.7436	0.7458	0.739947	0.6985	0.8644	0.7245	0.7391	0.7381	0.7295	0.79	0.8403	0.8095	0.8119	0.8453	0.6455	0.8793	0.5811	0.7611	0.8793	0.8697	0.7935	0.739947	0.7391	0.9303	0.7245	0.6799	0.568	0.7845	1	0.7182	0.8018	0.8875	0.7845	0.9358	0.7727	0.6927	0.7738	0.739947	0.6144	0.9462	0.7671	0.8349
SLC30A5_72303_AA	0.5882	0.3954	0.6715	0.5695	0.7464	0.556	0.4578	0.5882	0.4785	0.7646	0.497	0.8617	0.7401	0.591	0.4172	0.4676	0.5946	0.5033	0.8884	0.5509	0.5058	0.7847	0.7339	0.6627	0.6762	0.7712	0.9319	0.638	0.9048	0.6194	0.7619	0.5838	0.6242	0.8087	0.6433	0.5299	0.5942	0.6367	0.5957	0.7724	0.5825	0.5582	0.5331	0.5799	0.8929	0.5868	0.5662	0.415	0.4532
RAD17_72367_AD	0.4372	0.5951	0.4649	0.4541	0.7623	0.562	0.3986	0.4563	0.4379	0.688	0.2226	0.505285	0.4367	0.7373	0.6018	0.574	0.5167	0.4192	0.505285	0.4863	0.688	0.5557	0.436	0.5354	0.2139	0.505285	0.505285	0.4494	0.505285	1	0.7963	0.4551	0.3981	0.6286	0.2776	0.5839	0.6997	0.7504	0.6369	0.6974	0.562	0.4123	0.5501	0.6434	0.505285	0.6215	0.3303	0.5624	0.3942
GTF2H2C_72397_AD	0.7796	0.614	0.3707	0.6191	0.6534	0.5346	0.915	0.4399	0.8347	0.7446	0.6291	0.8873	0.84	0.5992	0.5303	0.6008	0.6651	0.4415	0.556539	0.4492	0.744	0.4912	0.6003	0.776	0.7429	0.556539	0.556539	0.7591	0.753	0.556539	0.5331	0.5667	0.3781	0.1672	0.6291	0.5975	0.6534	0.9223	0.3129	0.4922	0.7742	0.3584	0.5262	0.492	0.556539	0.2965	0.6242	0.9026	0.3571
GTF2H2C_72400_AD	0.5212	0.5699	0.5956	0.3369	0.702	0.3648	0.6916	0.4111	0.6451	0.1627	0.6967	0.6632	0.5676	0.4083	0.4551	0.2824	0.4982	0.5176	0.485683	0.4073	0.3036	0.4471	0.4289	0.5359	0.4867	0.785	0.7387	0.8254	0.289	0.4141	0.37	0.6855	0.4644	0.5699	0.4691	0.6712	0.2611	0.2289	0.3878	0.3773	0.6038	0.5576	0.4761	0.492	0.8497	0.2965	0.1784	0.5672	0.6896
SMN1_72422_AA	0.4562	0.9234	0.8507	0.4617	1	0.4049	0.3921	0.2969	0.4463	0.4998	0.447	0.42	0.4396	0.4576	1	0.4048	0.4509	0.3856	0.3311	0.5013	0.3492	0.6222	0.1948	0.4122	0.4846	0.3287	0.3095	0.4947	0.4286	0.6023	1	0.4676	0.4213	0.4833	0.4111	0.3464	0.4913	0.4702	0.4987	0.5368	0.4795	0.6357	0.4805	0.4147	0.532	0.5361	0.5054	0.414	0.1901
PTCD2_72469_AD	0.5015	0.4587	0.6273	0.4899	0.4745	0.4363	0.3813	0.4763	0.3749	0.4338	0.5821	0.7359	0.6378	0.5493	0.3574	0.4587	0.4055	0.4654	0.6701	0.592	0.5968	0.5792	0.5552	0.4106	0.5984	0.4393	0.775	0.5454	0.774	0.308	0.5753	0.5309	0.3873	0.3673	0.6403	0.5086	0.6378	0.4687	0.4789	0.4815	0.6637	0.8132	0.551	0.4871	0.6477	0.5149	0.5372	0.6224	0.3787
TMEM171_72484_AA	0.7039	0.5371	0.660279	0.6989	0.4462	0.3006	0.6171	0.6769	0.7485	0.660279	0.5964	0.6592	0.8131	0.757	0.5987	0.6989	0.6286	0.5752	0.6929	0.6803	0.660279	0.6592	0.6322	0.6286	0.6592	0.525	0.7437	0.6207	0.7074	0.6592	0.7437	0.6929	0.6592	0.4916	0.5473	0.7098	0.660279	0.7206	0.637	0.6691	0.7719	0.7316	0.4462	0.4716	0.6592	0.7343	0.7437	0.6851	0.660279
TBCA_72601_AA	0.9113	0.2697	0.8748	0.3437	0.6483	0.688	0.9329	0.7703	0.6047	0.39	0.6495	0.6949	0.8005	0.6703	0.6538	0.6093	0.5636	0.7593	0.4671	0.7348	0.434	0.6995	0.5152	0.7998	0.7778	0.7394	0.1821	0.8234	0.5541	0.4254	0.5629	0.7575	0.6065	0.7477	0.7918	0.8478	0.8257	0.6893	0.6565	0.8097	0.6826	0.8676	0.785	0.7964	0.9065	0.7393	0.8721	0.752	0.4036
XRCC4_72698_AA	0	0	0.4835	1	1	1	1	0.5552	1	0.803678	1	1	1	0.4503	1	1	1	1	1	1	1	1	1	1	1	0.3532	1	0.4503	0.5169	1	0.803678	1	0.3733	1	1	1	1	1	0	0	0.4835	0.4282	0.4598	0	0	0	1	1	0
TMEM161B_72733_AD	0.5647	0.8215	0.7069	0.6156	0.4215	0.3478	0.4819	0.4467	0.3816	0.2822	0.4518	0.6738	0.3107	0.5924	0.5254	0.5299	0.5853	0.4075	0.447266	0.4495	0.6333	0.4129	0.411	0.3158	0.3209	0.3141	0.3419	0.5323	0.447266	0.6249	0.504	0.385	0.5513	0.496	0.4032	0.6095	0.631	0.3045	0.5404	0.5223	0.3449	0.5576	0.6389	0.4929	1	0.7125	0.8225	0.2213	0.2526
MEF2C_72759_AA	0.4639	0.4204	0.4755	0.3102	0.3472	0.5371	0.6515	0.6031	0.5068	0.503628	0.3618	0.3833	0.4916	0.4277	0.4572	0.5473	0.4001	0.452	0.503628	0.311	0.4242	0.5708	0.4653	0.6074	0.5051	0.1854	0.503628	0.4462	0.503628	0.4678	0.4916	0.3183	0.4204	0.5473	0.503628	0.386	0.6592	0.4242	0.4916	0.5725	0.1947	0.3672	0.5032	0.3373	0.2438	0.4916	0.5154	0.7014	0.5919
ERAP2_72871_AD	0.115035	0.0641	0	0.0214	0.0242	0.0801	0.115035	0.115035	0.0736	0	0.115035	0.4687	0.032	0	0.1074	0.0161	0.0588	0.0544	0.0155	0.0456	0.0419	0.4527	0.0147	0.2926	0.0552	0.115035	0.0422	0.159	0.0523	0.115035	0.0197	0.1169	0.0361	0.4809	0.115035	0.0186	0.0462	0.4527	0.0065	0.0324	0.0117	0.3982	0.0993	0.0429	0.0467	0.006	0.0441	0.0531	0.0123
ERAP2_72872_AD	0.25132	0.0576	0.0738	0.0024	0.0203	0.0485	1	1	0.0312	0	0.25132	0.8302	0.072	0.1089	0.0859	0.0046	0.04	0.203	0.1325	0.0868	0.0382	0.25132	0	0.8953	0.0609	0.25132	0	0.1089	0	1	0.0485	0.1158	0.1549	1	1	0.0126	0.0694	1	0.0022	0.0177	0.069	1	0.0449	0.0738	0.5238	0.0291	0.141	0.054	0.0077
CSNK1G3_73147_AA	0.3259	0.5116	0.4916	0.3099	0.3672	0.2567	0.5584	0.2321	0.392	0.404695	0.293	0.404695	0.4462	0.4916	0.381	0.3792	0.5708	0.4362	0.404695	0.4129	0.5211	0.5417	0.518	0.3559	0.2438	0.3672	0.404695	0.3982	0.404695	0.404695	0.5632	0.4532	0.5632	0.5371	0.1621	0.4916	0.4653	0.1535	0.4085	0.5919	0.1535	0.3006	0.4916	0.4417	0.404695	0.4532	0.3672	0.3032	0.3731
P4HA2_73259_AA	0.206	0.237	0.4131	0.3165	0.3634	0.2355	0.604	0.5412	0.5589	0.5847	0.3405	0.5211	0.3538	0.4936	0.3261	0.3105	0.178	0.4964	0.375802	0.5066	0.4131	0.2383	0.6634	0.2522	0.1901	0.3603	0.2338	0.375802	0.273	0.3194	0.6014	0.3538	0.4635	0.3486	0.4263	0.2383	0.3805	0.3639	0.2546	0.2604	0.3207	0.3165	0.2556	0.2686	0.2383	0.2229	0.474	0.4186	0.2877
SHROOM1_73311_AA	0.0756	0.0403	0.457	0.0351	0.220539	0.2911	0.3252	0.1614	0.220539	0.220539	0.0553	0.2735	0.220539	0.4515	0.1672	0.2528	0.220539	0.125	0.220539	0.3581	0.1004	0.3904	0.220539	0.2248	0.2293	0.220539	0.1327	0.2691	0.0977	0.220539	0.1698	0.3912	0.3487	0.6163	0.220539	0.4588	0.409	0.4454	0.0887	0.5456	0.4232	0.3526	0.7005	0.391	0.45	0.5876	0.3157	0.3823	0.220539
UQCRQ_73319_AD	0.4476	0.8303	0.239	0.6224	0.6167	0.479918	0.3175	0.4104	0.5416	0.364	0.6115	0.3739	0.4469	0.5893	0.6284	0.2913	0.479918	0.5421	0.343	0.1515	0.4405	0.5318	0.4011	0.6319	0.5115	0.5963	0.4697	0.4242	0.5403	0.4504	0.4216	0.3299	0.5873	0.5093	0.4831	0.5461	0.608	0.4979	0.7583	0.5759	0.5105	0.5399	0.6226	0.6537	0.4198	0.5945	0.4445	0.4878	0.5249
PHF15_73404_AA	0.729646	0.6423	0.729646	0.6423	0.8855	0.6286	0.8354	0.8165	0.729646	0.729646	0.8627	0.6592	0.729646	0.729646	0.5632	0.7558	0.7437	0.5473	0.729646	0.8855	0.8286	0.729646	0.8969	0.853	0.853	0.5919	1	1	0.7437	0.729646	0.6351	0.8969	0.7437	0.7946	0.7437	0.729646	0.392	0.7861	0.9207	0.729646	0.7946	0.7437	0.9263	0.7719	0.729646	0.6592	0.5417	0.7437	0.5473
PHF15_73410_AD	1	1	0.924833	1	1	1	1	0.9263	0.924833	1	0.8694	0.924833	1	1	1	0.9119	1	1	0.924833	0.7306	1	1	1	1	0.6564	1	1	1	1	1	0.7473	0.7753	1	1	1	1	1	0.865	0.5617	0.924833	1	0.4965	1	0.7871	0.924833	1	0.8038	1	1
APBB3_73680_AD	0.1271	0.2936	0.5357	0.3235	0.4993	0.2646	0.3076	0.388	0.209	0.2496	0.2212	0.4835	0.6257	0.6086	0.3456	0.3349	0.1961	0.4547	0.2187	0.3858	0.4572	0.4684	0	0.1227	0.5508	0.3015	0	0.6999	0.3955	0.3623	0.322	0.5676	0.3789	0.346	0.314	0.6168	0.3515	0.2984	0.6478	0.4793	0.3413	0.4644	0.5421	0.3545	0.8727	0.6648	0.2526	0.2578	0.2357
HARS2_73743_AD	0.8434	0.7667	1	0.7772	0.8946	0.5637	0.8492	0.808	1	1	0.9384	0.8958	1	1	0.8858	0.8447	1	0.8957	1	0.8991	1	1	1	0.9057	0.8299	1	0.3674	0.9437	1	0.6557	0.8497	0.7988	0.8865	1	0.8704	0.9166	1	1	0.9174	0.945	0.9462	1	0.8629	0.7987	0.9439	0.8746	0.8753	1	1
ARHGAP26_73876_AD	0.1353	0.0839	0.1039	0.0733	0.252069	0.252069	0.3925	0.0757	0.32	0.252069	0.2887	0.1339	0.1365	0.2581	0.2488	0.0887	0.2581	0.2581	0.252069	0.1941	0.1585	0.5439	0.385	0.1365	0.2274	0.199	0.252069	0.1154	0.252069	0.0578	0.1882	0.2581	0.1339	0.0372	0.448	0.3534	0.2983	0.1123	0.1595	0.1339	0.1882	0.367	0.3575	0.2384	0.4651	0.2362	0.1481	0.1407	0.1481
PRELID2_73896_AA	1	0.6584	1	0.7046	0.8999	0.943443	1	1	1	0.943443	0.4785	1	1	1	0.7453	1	1	1	1	1	1	1	1	1	1	1	1	0.728	1	1	1	1	0.6816	1	1	0.702	1	0.943443	1	1	1	1	1	0.8852	1	1	1	1	1
TIGD6_74053_AD	0.7036	0.6513	0.9582	0.7606	0.8703	0.9183	0.7499	0.8358	0.942	0.8878	0.6718	0.8441	0.7142	0.9159	0.7343	0.7615	0.8959	0.7583	1	0.9459	0.8783	0.8313	0.7954	0.8252	0.8851	0.8457	0.9292	0.7599	0.9427	0.6803	0.8912	0.8275	0.7119	0.9564	0.9507	0.6827	0.7904	0.6229	0.8227	0.7505	0.7805	0.7996	0.7934	0.7954	0.9445	0.8762	0.941	0.8652	0.8735
RNF44_74660_AA	0.5657	0.5419	0.761	0.5735	0.5581	0.6817	0.6833	0.6099	0.5366	0.6984	0.5882	0.4242	0.5719	0.5914	0.7745	0.5699	0.4764	0.6403	0.578261	0.578261	0.4267	0.4356	0.5554	0.4826	0.3235	0.4198	0.6346	0.7901	0.5746	0.5746	0.6875	0.5771	0.5476	0.6069	0.5442	0.6263	0.5575	0.6867	0.6946	0.5602	0.715	0.5172	0.6263	0.7664	0.8742	0.6631	0.5827	0.5644	0.6238
UIMC1_74697_AD	0.4144	0.5111	0.6388	0.5702	0.5834	0.932	0.5251	0.6075	0.7177	0.512049	0.5582	0.6546	0.5923	0.3798	0.5886	0.395	0.4865	0.4401	0.5702	0.2952	0.7879	0.7195	0.2364	0.6388	0.6459	0.4291	0.3322	0.4693	0.5251	0.6388	0.6886	0.41	0.3988	0.4049	0.5251	0.6123	0.5348	0.6527	0.4132	0.4181	0.5251	0.5597	0.5488	0.6683	0.7796	0.6207	0.4566	0.4815	0.5042
GRK6_74765_AA	0.1732	0.1785	0.2162	0.4087	0.3757	0.1539	0.2521	0.2609	0.2032	0.3875	0.2812	0.3284	0.3946	0.1153	0.1591	0.2258	0.3548	0.2408	0.6471	0.4373	0.2762	0.1929	0.2781	0.3615	0.4153	0.2916	0.3715	0.1257	0.1964	0.5301	0.3077	0.1732	0.2383	0.3077	0.1785	0.1598	0.2659	0.3077	0.4618	0.2705	0.1785	0.3284	0.1803	0.2418	0.23	0.2812	0.3478	0.234	0.2683
GNB2L1_75059_AA	0.5923	0.8925	0.8956	0.6888	0.6748	0.6992	0.6513	0.762	0.9152	0.729681	0.7296	0.8366	0.5705	0.6513	0.7346	0.7326	0.729681	0.5961	0.4991	0.6382	0.7686	0.6644	1	0.6106	0.7135	0.7135	0.744	0.7077	0.8402	0.9013	0.8059	0.7296	0.7296	0.744	0.6106	0.6699	0.7244	0.8971	0.681	0.8655	0.6834	0.6382	0.7994	0.6782	0.6485	0.847	0.9502	0.7851	0.7686
GNB2L1_75066_AD	0.7116	0.8638	0.9461	0.4723	0.7276	0.5822	0.9287	0.944	0.6281	0.6453	0.7084	0.9632	0.7949	0.8747	0.8655	0.8027	0.6215	0.6957	0.522	0.7299	0.7696	0.5219	0.2972	0.7329	0.949	0.9112	0.9318	0.7932	0.6223	0.4958	0.9306	0.8846	0.8202	0.676	0.7285	0.7818	0.7345	0.8502	0.6698	0.6286	0.8844	0.6529	0.7307	0.844	0.8508	0.8165	0.8833	0.8787	0.9537
PSMG4_75184_AA	0.5003	1	0.8344	0.5054	1	1	1	1	0.584	0.766264	0.7301	0.656	0.4377	1	0.808	0.4563	1	0.8374	1	1	1	0.4597	0.1413	0.3629	0.1877	0.5251	0.4126	0.9003	0.216	0.4687	1	0.5714	0.211	1	0.7502	1	1	1	0.8068	0.8244	1	0.6739	0.7065	0.4895	0.882	0.6611	1	1	1
SLC35B3_75288_AD	0.7406	0.8631	0.8408	0.9221	1	0.8302	0.8042	0.939	0.837364	0.8066	0.8948	0.7834	0.7634	1	0.9078	0.8137	0.6617	0.8479	1	0.837364	1	1	1	1	1	0.8273	0.5182	0.837364	0.837364	0.837364	0.837364	0.7726	0.8883	0.6071	0.8725	0.8123	0.837364	1	0.734	0.7634	0.8786	0.8496	0.8554	0.8496	1	0.837364	1	0.8042	0.8932
TBC1D7_75383_AD	0.5447	0.3808	0.6743	0.4069	0.5575	0.4939	0.4799	0.417	0.2124	0.5763	0.8218	0.5918	0.3212	0.1058	0.3021	0.5855	0.452	0.3763	0.4151	0.343	0.713	0.1543	0.7546	0.2799	0.3952	0.1686	0.4299	0.452	0.6871	0.4151	0.3073	0.7615	0.2619	0.4617	0.5171	0.5798	0.3351	0.4732	0.5156	0.3345	0.5156	0.3018	0.5278	0.5654	0.452	0.2986	0.5589	0.5974	0.2584
TBC1D7_75384_AD	0.4624	0.542	0.482785	0.3322	0.4592	0.7069	0.5009	0.6751	0.2448	0.482785	0.482785	0.5294	0.4911	0.114	0.3934	0.6268	0.482785	0.4703	0.3915	0.3305	0.6069	0.4426	0.5967	0.3233	0.4704	0.1807	0.5111	0.6837	0.4432	0.482785	0.2245	0.5627	0.4356	0.6696	0.3749	0.5456	0.461	0.2457	0.5366	0.3535	0.5366	0.6388	0.6837	0.3974	0.482785	0.5366	0.4838	0.5957	0.579
TDP2_75528_AD	0.1595	0.0634	0.1453	0.0597	0.1603	0.0305	0.1378	0.0796	0.1317	0.1138	0.1367	0.2006	0.2781	0.1779	0.0996	0.0625	0.0787	0.1569	0.1335	0.1336	0.1047	0.2254	0.1245	0.0912	0.1018	0.1566	0.0868	0.3151	0.2207	0.0625	0.2602	0.1637	0.1119	0.1119	0.086	0.2269	0.1811	0.2248	0.1345	0.2763	0.1526	0.2819	0.38	0.128	0.7716	0.2223	0.1095	0.0835	0.067
BTN2A2_75643_AA	0.1958	0.1133	0.2822	0.2725	0.2018	0.1901	0.3899	0.2229	0.1544	0.1274	0.2532	0.1544	0.3047	0.451	0.4221	0.1654	0.5228	0.3469	0.0945	0.3195	0.4474	0.2333	0.288715	0.3274	0.4108	0.2675	0.0945	0.3783	0.288715	0.375	0.3014	0.3607	0.2112	0.4817	0.4455	0.4221	0.561	0.451	0.3047	0.374	0.1643	0.3868	0.4064	0.2347	0.3428	0.4854	0.4573	0.1456	0.2473
BTN2A2_75655_AD	0.605679	0.3517	0.1655	0.6749	0.605679	0.7494	0.4372	0.4992	0.4372	0.5992	0	0.5717	0.448	0.6308	0.2993	0.5164	0.5628	0.6188	0.8245	0.6207	0.6174	1	0.5617	0.5219	0.7585	0.3459	0.605679	0.6578	0.605679	0.6308	0.5402	0.7401	0.8245	0.4886	0.5992	0.4845	0.695	0.5402	0.5684	0.6308	0.6308	0.6686	0.6188	0.5875	0.605679	0.4392	0.7494	0.7841	0.5108
BTN3A1_75658_AA	0.3542	0.6002	0.217	0.6213	0.8701	0.2878	0.4025	0.7389	0.787	0.654397	0.6002	0.8572	0.5151	1	0.654397	0.5634	0.7248	1	1	0.5676	0.6022	0.634	1	0.5809	0.6086	0.634	1	1	0.654397	0.6581	0.5809	0.6391	0.6869	0.8144	0.4802	0.4288	0.6936	0.3069	0.7138	0.8261	0.8356	0.454	1	1	0.654397	0.4586	0.475	0.5258	0.768
BTN3A1_75659_AA	0.1382	0.2877	0.1273	0.338	0.3175	0.2144	0.2514	0.3088	0.3	0.2875	0.2282	0.4804	0.1925	0.3251	0.0839	0.2235	0.3001	0.2941	0.4866	0.3099	0.267	0.2961	0.2888	0.2267	0.3299	0.2297	0.3736	0.4545	0.283552	0.3346	0.1608	0.296	0.2493	0.3817	0.2576	0.157	0.2956	0.1378	0.2321	0.3642	0.2786	0.2126	0.2278	0.2829	0	0.2184	0.3229	0.1546	0.3335
BTN3A1_75660_AA	0.2281	0.2345	0.3699	0.2643	0.0702	0.4714	0.3565	0.1466	0.1111	0.198331	0.2044	0.1517	0.2081	0	0.4698	0.1972	0.1606	0	0	0.29	0.2154	0.2224	0	0.2039	0.2534	0.1787	0	0	0.6456	0.2252	0.1387	0.2172	0.1389	0.1422	0.3081	0.2232	0.1589	0.2913	0.1348	0.1261	0.0867	0.2976	0	0	0.2943	0.2732	0.3809	0.1488	0.14
ZSCAN9_75724_AD	0.6543	0.6235	0.713	0.8009	0.7884	0.8324	0.713	0.9191	0.751	0.727626	0.5686	0.7269	0.554	0.8502	0.713	0.707	0.8502	0.8502	0.727626	0.7931	0.7712	0.7801	0.8098	0.7546	0.7269	0.5867	0.6149	0.7801	0.8646	0.7801	0.5247	0.7801	0.9342	0.612	0.931	0.7801	0.5997	0.816	0.673	0.9141	0.7884	0.791	0.5156	0.7731	0.9141	0.8949	0.4599	0.8218	0.646
ATP6V1G2-DDX39B_75749_AA	0.5839	0.7231	0.7136	0.7428	0.689	0.5936	0.732	0.6637	0.7612	0.713	0.6863	0.6842	0.5813	0.7675	0.8158	0.7412	0.6468	0.7022	0.6128	0.6173	0.5005	0.7767	0.5204	0.7255	0.3748	0.5591	0.6266	0.8038	0.7391	0.4535	0.5947	0.7634	0.5544	0.7459	0.5427	0.6894	0.5994	0.7811	0.7139	0.6416	0.6204	0.6108	0.4696	0.7724	0.6108	0.6977	0.5088	0.5806	0.7518
HMGA1_75774_AD	0.620492	0.620492	0.6902	0.3528	0.4185	0.8041	1	0.4155	1	0.620492	0.7542	0.6448	0	0.856	0.620492	0.797	0.3528	0.7562	0.1809	0.438	0.620492	0.7793	1	0.8142	0.5742	0.6751	0.7014	0.7684	0.8028	0.2598	0.5114	1	0.6832	0.7732	0.5763	0.4584	0.6729	0.5728	0.3212	0.620492	0.8632	1	0.2209	0.8892	1	0.6582	0.35	0.7996	0.6439
ZNF76_75901_AA	0.11	0.1272	0.2659	0.1981	0.1052	0.1509	0.1254	0.1548	0.2157	0.1343	0.1453	0.3413	0.2131	0.118	0.4323	0.1547	0.2895	0.2079	0.1434	0.3406	0.1347	0.18	0.1003	0.1969	0.2372	0.1683	0.0559	0.5106	0.14	0.2347	0.3133	0.3442	0.1625	0.2338	0.0911	0.3779	0.3886	0.2034	0.1268	0.31	0.2727	0.3681	0.2893	0.3481	0.4495	0.4987	0.1973	0.2273	0.1103
PRICKLE4_76141_AA	0.4439	0.4757	0.6249	0.4757	0.7002	0.8278	0.4516	0.5069	0.694	0.4549	0.6031	0.9097	0.6315	0.7858	0.6329	0.6642	0.6853	0.682	0.663021	0.8554	0.4895	0.8989	0.3168	0.4995	0.726	0.3726	0.7223	0.4757	0.5964	0.7023	0.6753	0.5212	0.6558	0.7725	0.7982	0.6971	0.843	0.6774	0.6129	0.9353	0.7895	0.7967	0.8862	0.7618	0.7878	0.8982	0.8947	0.6447	0.4402
CCND3_76160_AD	0.0287	0.0254	0.1069	0.0498	0.0305	0.0457	0.0212	0.038	0.0114	0.0081	0.0541	0.0748	0.0755	0.0134	0.0426	0.0696	0.0475	0.0195	0.0624	0.0809	0.0111	0.3099	0.0061	0.0422	0.0287	0.0547	0.0447	0.428	0.0301	0.0463	0.0337	0.0374	0.1152	0.0989	0.1137	0.0598	0.1337	0.0771	0.0117	0.0999	0.0739	0.0755	0.0943	0.1152	0.6385	0.0973	0.2916	0.1069	0.0642
KLC4_76230_AD	0.899	0.7303	0.869	1	0.8441	1	1	0.7973	1	0.7154	0.6864	0.7719	0.6592	0.9028	0.7258	0.8002	1	0.8904	0.84355	0.9155	0.8286	0.7769	0.8227	1	1	1	1	0.6949	1	1	0.8713	0.7946	1	0.7633	1	0.8515	0.8948	0.8744	0.4447	0.8227	1	0.6024	0.9251	0.9194	0.8165	0.9063	1	0.859	0.8829
KLC4_76232_AD	0.821	0.8962	1	0.7229	0.8464	0.604	0.7892	0.8568	0.8711	1	1	1	0.8332	0.8368	0.8774	1	0.5467	0.769	0.879888	1	0.8393	1	1	0.6623	0.823	0.8052	1	0.8805	0.7554	1	1	0.8307	1	0.7451	1	0.9257	0.906	0.7873	1	0.8396	0.9118	1	0.9287	0.7872	1	0.9175	1	0.8135	1
TJAP1_76276_AA	0.6592	0.4362	0.6592	0.4916	0.4731	0.6989	0.6207	0.5194	0.2789	0.2438	0.4699	0.4731	0.5078	0.6423	0.5014	0.5355	0.2973	0.5499	0.6929	0.6496	0.6237	0.5919	0.392	0.5961	0.44	0.3607	0.3259	0.6286	0.3767	0.4318	0.5919	0.48	0.4204	0.3362	0.4085	0.5632	0.6121	0.44	0.3974	0.7074	0.4653	0.6091	0.5856	0.3705	0.7154	0.4788	0.4814	0.4788	0.5542
YIPF3_76293_AA	0.351722	0.3672	0.1021	0.2661	0.4916	0.4362	0.293	0.3495	0.351722	0.351722	0.4916	0.5211	0.3559	0.2567	0.392	0.2165	0.351722	0.4781	0.351722	0.351722	0.3453	0.3424	0.351722	0.4362	0.351722	0.5919	0.3523	0.2249	0.3259	0.293	0.1078	0.4622	0.392	0	0.1947	0.2848	0.3053	0.351722	0.3259	0.351722	0.4916	0.3053	0.381	0.3086	0.5542	0.3607	0.3607	0.4916	0.4037
VEGFA_76325_AD	0.1966	0.4442	0.3444	0.2319	0.3852	0.2189	0.4522	0.3455	0.3971	0.5848	0.2228	0.3838	0.3168	0.5586	0.5562	0.4181	0.4472	0.3818	0.301378	0.6818	0.5497	0.281	0.2968	0.4105	0.2295	0.2513	0.301378	0.2389	0.301378	0.4783	0.5561	0.323	0.1405	0.3556	0.1721	0.458	0.3784	0.4178	0.1262	0.5261	0.4648	0.5188	0.4289	0.3918	0.2292	0.3498	0.463	0.4422	0.2785
FAM135A_76637_AA	0.4768	0.6801	0.8281	0.461	1	0.5301	0.7174	0.494	0.3231	0.652338	0.6756	0.5529	0.6286	1	0.7575	0.6613	0.4128	0.725	0.652338	0.7368	0.7225	0.3607	1	0.5503	0.5203	1	0.652338	0.8014	0.652338	0.652338	0.6888	1	1	1	0.6194	0.7368	0.6888	0.7412	0.214	1	0.6949	0.7009	0.7934	0.7719	1	0.5503	0.6979	0.6212	0.6194
C6orf203_77126_AD	0.237	0.3894	0.3644	0.1045	0.2737	0.307	0.4241	0.2539	0.2586	0.3154	0.4829	0.2027	0.2892	0.2393	0.1635	0.2997	0.1874	0.4567	0.2074	0.1874	0.1242	0.1088	0.0826	0.2056	0.2659	0.3358	0.1699	0.3195	0.2342	0.3302	0.1811	0.1837	0.1467	0	0.1786	0.414	0.2051	0.2029	0.1484	0.1316	0.2776	0.1285	0.2089	0.2546	0.2602	0.0805	0.214	0.5317	0.4239
CEP57L1_77162_AD	0.2772	0.0727	0.167007	0.058	0	0.1978	0.167007	0.2444	0.1978	0	0.0727	0.3929	0.1978	0.4084	0.1687	0.1774	0	0.3014	0.2234	0	0	0.0671	0.3411	0.1172	0.167007	0.167007	0.3014	0.1774	0.3014	0	0.167007	0.1097	0.1097	0.1172	0.2234	0.1257	0.1097	0.167007	0.0321	0.1356	0	0.167007	0	0.2098	0.5189	0	0.167007	0.167007	0
TUBE1_77291_AA	0.1996	0.3153	0.594	0.1426	0.2101	0.3328	0.2449	0.3573	0.1069	0.4181	0.1302	0.3995	0.3438	0.5343	0.2792	0.3534	0.2549	0.2085	0.290382	0.2619	0.3745	0.5187	0.290382	0.4637	0.0907	0.3099	0.290382	0.7054	0.290382	0.1069	0.525	0.4994	0.297	0.5995	0.242	0.5321	0.5232	0.3051	0.2779	0.5619	0.1932	0.3888	0.5321	0.2817	0.8732	0.5449	0.44	0.3018	0.1497
LAMA4_77297_AD	0.3707	0.3683	0.3332	0.3831	0.3263	0.324548	0.3449	0.1919	0.1786	0.0823	0.3569	0.3185	0.324548	0.4729	0.3263	0.1231	0.4467	0.3603	0.324548	0.3417	0.3881	0.4318	0.409	0.3123	0.5184	0.4467	0.324548	0.1772	0.7386	0.3394	0.3499	0.4467	0.2876	0.2441	0.128	0.2621	0.4609	0.2685	0.3719	0.3499	0.324548	0.3499	0.3499	0.212	0.0545	0.3057	0.5924	0.212	0.1874
LAMA4_77300_AD	0.4218	0.3346	0.4338	0.456	0.3697	0.452405	0.5288	0.4444	0.3177	0.452405	0.3585	0.456	0.452405	0.3278	0.557	0.456	0.557	0.5212	0.452405	0.3238	0.3697	0.3156	0.43	0.6263	0.2511	0.3238	0.8217	0.2184	0.5399	0.5116	0.5116	0.5333	0.452405	0.5354	0.4731	0.4793	0.4389	0.4744	0.4231	0.345	0.557	0.6377	0.6184	0.4369	0.4683	0.6054	0.452405	0.452405	0.452405
NCOA7_77429_AA	0.7442	0.6292	0.659702	0.6452	0.659702	0.565	0.4444	0.7298	0.8	0.659702	0.5	0.6707	0.5926	0.8972	0.7179	0.7626	0.7442	0.6857	0.659702	0.8706	0.5	0.659702	0.8358	0.6154	0.7442	0.659702	0.659702	0.6292	0.659702	0.659702	0.766	0.708	0.56	0.6857	0.5045	0.9106	0.8533	0.5926	0.7724	0.6598	0.4923	0.7591	0.6857	0.7591	0.659702	0.5746	0.5926	0.6224	0.705
AKAP7_77606_AA	0.2743	0.272	0.2441	0.3032	0.2521	0.1459	0.4187	0.2162	0.33	0.142	0.1907	0.107	0.7423	0.329	0.365	0.4361	0.5742	0.3154	0.299403	0.3538	0.299403	0.5671	0.264	0	0.4044	0.2521	0.0756	0.3327	0.0944	0.365	0.4338	0.1622	0.4369	0.2606	0.2108	0.4051	0.552	0.3958	0.3379	0.1929	0.2132	0.5584	0.4408	0.281	1	0.3095	0.3197	0.2346	0.2099
RAET1G_78132_AA	0.2339	0.621	0.6276	0.7065	0.7374	0.3188	0.582832	0.6781	0.4835	0.4382	0.4835	0.5841	0.3916	0.7006	0.582832	0.4573	0.582832	0.8082	0.582832	0.6094	1	0.7629	0.2435	0.5552	0.582832	0.5073	0.6094	0.7892	0.621	0.582832	0.7573	0.4282	0.5513	0.6292	0.6519	0.7892	0.5073	0.2598	0.6446	0.3562	0.6698	0.4382	0.3987	0.7892	0.4835	0.4452	0.4618	0.6519	0.6611
IYD_78143_AD	0.6478	0.4365	0.6297	0.5153	0.6032	0.558417	0.6604	0.4659	0.6904	0.4587	0.4476	0.9453	0.676	0.2881	0.5526	0.5121	0.7119	0.402	0.6153	0.5433	0.7858	0.558417	0.558417	0.6117	0.5671	0.8556	0.7459	0.5446	0.4771	0.5596	0.5417	0.5552	0.5269	0.8083	0.558417	0.5028	0.558417	0.558417	0.7048	0.4287	0.4767	0.6817	0.6182	0.6259	0.4217	0.5733	0.7506	0.6643	0.4413
IYD_78147_AA	0.3234	0.3865	0.3441	0.4148	0.3061	0.3713	0.3561	0.2026	0.4302	0.3928	0.1743	0.5433	0.4614	0.4437	0.3025	0.3701	0.2986	0.3461	0.3896	0.4235	0.4018	0.36203	0.36203	0.3828	0.447	0.4122	0.3725	0.3277	0.2962	0.2407	0.4503	0.263	0.3727	0.5126	0.5415	0.3083	0.36203	0.36203	0.322	0.1736	0.2642	0.4476	0.4291	0.3568	0.2299	0.347	0.4865	0.4126	0.5103
ZDHHC14_78241_AA	0.6907	0.8113	0.7258	0.8562	0.8687	0.2486	0.9026	0.8353	0.849	0.6984	0.6984	0.8881	1	0.7554	0.8823	0.6232	0.4764	0.665	0.7258	0.5696	0.4527	0.6453	0.813	0.8687	0.6723	0.8687	0.723629	0.8687	0.8792	0.5333	1	0.8323	0.7486	0.8562	0.7081	0.7572	0.7258	0.7154	0.6173	0.5366	0.8562	0.5366	0.6324	0.723629	0.8411	0.7894	0.7844	1	0.665
SYNJ2_78249_AD	0.5349	0.3284	0.7077	0.426	0.4104	0.3187	0.5461	0.3407	0.5011	1	0.5567	0.5796	0.5035	0.5678	0.5362	0.3091	0.5683	0.6462	1	0.4527	0.2695	0.6061	0.6988	0.2784	0.4161	0.5766	0.8891	0.8004	1	0.6714	0.5063	0.5605	0.44	0.3955	0.6066	0.6289	0.4813	0.4435	0.742	0.8339	0.4051	0.467	0.5297	0.3429	0.9377	0.3754	0.6214	0.2962	0.309
MAP3K4_78358_AD	0.4063	0.386	0.5136	0.459	0.3375	0.5902	0.5435	0.459	0.5271	0.1935	0.3758	0.4816	0.5166	0.4681	0.451	0.5276	0.4681	0.543	0.469269	0.4364	0.5803	0.3548	0.5182	0.5271	0.416	0.5098	0.3056	0.3427	0.435	0.5014	0.6377	0.569	0.4088	0.4465	0.5308	0.6025	0.6787	0.5885	0.3721	0.7788	0.4371	0.5399	0.4816	0.3886	0.6875	0.536	0.5911	0.3456	0.2335
QKI_78408_AA	0.2894	0.329	0.6226	0.2289	0.49	0.1578	0.1775	0.1919	0.1561	0.364722	0.4218	0.1755	0.3692	0.4131	0	0.2282	0.0817	0.4146	1	0.0736	0.3246	0.364722	0.2736	0.3098	0.3051	0.6694	1	0.4266	0.5179	0.3489	0.4496	0.3326	0.2567	0.7763	0.364722	0.2359	0.1456	0.1793	0.393	0.6467	0.364722	0.3275	0.4098	0.2481	0.364722	0.281	0.364722	0.2249	0.1684
QKI_78410_AA	0.1626	0.0761	0.1486	0.1074	0.0674	0.0372	0.0626	0.0427	0.1212	0.140716	0.1519	0.09	0.2642	0.1712	0	0.0953	0.0442	0.1153	0.7852	0.044	0.126	0	0.1828	0.1246	0.1489	0.3818	0.2335	0.0901	0.6262	0.1675	0.2281	0.0556	0.0967	0.1972	0	0.1032	0.0598	0.0417	0.1317	0.2099	0	0.1158	0.0925	0.1159	0.140716	0.1034	0	0.0408	0.0258
QKI_78411_AA	0.345	0.1884	0.1071	0.3163	0.0844	0.2003	0.2919	0.1952	0.4243	0.5253	0.2315	0.338	0.4092	0.253	0.231	0.2813	0.3552	0.2043	0.254367	0.4405	0.293	0.2135	0.3984	0.2924	0.3427	0.351	0.254367	0.1486	0.6222	0.2981	0.3388	0.1533	0.2878	0.0979	0.1713	0.3083	0.3199	0.2085	0.2324	0.1735	0.1679	0.2611	0.1731	0.3067	0.254367	0.2755	0.3103	0.1532	0.1258
TBP_78496_AA	0.2438	0.3053	0.3086	0.2848	0.1535	0.1078	0.4204	0.2438	0.3259	0.303129	0.1621	0.7632	0.2567	0.2339	0.3142	0.3993	0.303129	0.3849	0.303129	0.3259	0.5473	0.2087	0.303129	0.2567	0.2848	0.4916	0.3259	0.3495	0.303129	0.1621	0.1388	0.3259	0.1947	0.303129	0.2293	0.2438	0.2789	0.2602	0.3792	0.4916	0.2545	0.3386	0.3006	0.3006	0.1214	0.1535	0.3559	0.3495	0.392
C7orf50_78560_AD	0.3321	0.7512	0.1869	0.2074	0.5944	0.318	0.4864	0.2225	0.3719	0.2779	0.195	0.2148	0.3833	0.1801	0.3668	0.3358	0.1614	0.3371	1	0.288	0.5016	0.2325	0.1508	0.8116	0.5776	0.4253	0.2002	0.2855	0.3538	0.3214	0.201	0.2532	0.4864	0.5159	0.2751	0.2621	0.2388	0.4442	0.4602	0.6279	0.3514	0.7566	0.2134	0.4402	0.4301	1	0.2658	0.3321	0.3754
C7orf50_78561_AD	0.9514	0.9909	0.5443	0.8319	0.9853	0.9475	0.9786	0.8265	0.9744	0.9707	0.8666	0.7988	0.9346	0.7827	0.6118	0.8928	0.8876	0.8967	1	0.8608	0.962	0.8755	0.6673	0.9878	0.9224	0.9738	0.9517	0.8805	0.9703	0.9142	0.8681	0.8889	0.9396	0.9805	0.8757	0.8141	0.8186	0.9631	0.9728	0.9781	0.9025	0.9896	0.5301	0.9591	0.8575	1	0.5364	0.87	0.862
MAD1L1_78602_AA	0.7746	0.8462	0.205	0.7908	0.6322	0.602	0.6735	0.6511	0.7333	0.3548	0.7857	0.5937	0.7857	0.7333	0.8148	0.6373	0.534	0.873	0.4622	0.745	0.8539	0.3756	0.9212	0.6511	0.3793	0.2558	0.5789	1	0.5077	0.704985	0.828	0.7205	0.6471	0.4074	0.5077	0.616	0.8877	0.6735	0.7186	0.8919	0.7557	0.8132	0.7857	0.7746	0.704985	0.7333	0.828	0.7466	0.5983
RNF216_78675_AA	0.4815	0.4565	0.3729	0.414	0.4046	0.4513	0.4454	0.5111	0.4199	0.4046	0.3439	0.4648	0.4112	0.4164	0.3421	0.5357	0.4992	0.5116	0.45142	0.4852	0.4848	0.5337	0.4046	0.5761	0.3691	0.5209	0.6132	0.5897	0.2536	0.3376	0.4593	0.4164	0.4371	0.2712	0.5869	0.3838	0.4149	0.2536	0.4855	0.5048	0.5998	0.3376	0.3982	0.5197	0.5048	0.2197	0.5214	0.4896	0.5127
DAGLB_78725_AD	0.4432	0.3254	0.6366	0.5176	0.4056	0.2372	0.453	0.3592	0.2785	0.2861	0.3586	0.5244	0.4356	0.5665	0.3703	0.3028	0.5649	0.2974	0.6036	0.545	0.5796	0.7009	0.4198	0.2985	0.5471	0.3398	0.5293	0.6633	0.4136	0.4294	0.5194	0.44	0.5046	0.5176	0.4212	0.5273	0.5465	0.5029	0.3713	0.5322	0.5002	0.563	0.5201	0.3524	0.603	0.5998	0.582	0.4559	0.3219
ZDHHC4_78748_AD	0.5562	0.0579	0	0.5612	0.7336	0.0903	0.2366	0.3025	0.2908	0.31027	0.2448	0.6346	0.1094	0.1461	0.4451	0.2263	0.15	0.183	0.31027	0.4059	0.2669	0.4927	0.2775	0.1263	0.5034	0.5178	0.6946	0.1533	0.1976	0.252	0.0522	0.1593	0.1643	0.3933	0.5179	0.4017	0.1548	0.0506	0.1097	0.6454	0.2466	0.2265	0	0.2945	0.31027	0.5694	0.1928	0.3078	0.1154
ZDHHC4_78753_AD	0.4412	0.2216	0.1445	0.4057	0.4931	0.6303	0.3581	0.3321	0.3098	0.2634	0.187	0.4936	0.1696	0.1711	0.3401	0.305	0.2976	0.1912	0.0891	0.2983	0.3164	0.3118	0.1336	0.3423	0.4516	0.4378	0.423	0.1656	0.2293	0.2575	0.172	0.256	0.1452	0.3859	0.3236	0.2697	0.2951	0.3058	0.0803	0.2565	0.2518	0.3251	0.1957	0.3163	0.1694	0.1705	0.2405	0.2769	0.2345
OSBPL3_79025_AD	0.2612	0.3275	0.5401	0.2688	0.3985	0.2845	0.5671	0.2488	0.385	0.2052	0.4281	0.6072	0.5808	0.6375	0.4325	0.2814	0.4885	0.6969	0.5117	0.4016	0.4335	0.3836	0.1288	0.39	0.5309	0.8126	0.6379	0.5304	0.3419	0.5503	0.3941	0.5052	0.4619	0.4556	0.5745	0.7255	0.4914	0.6257	0.4144	0.6818	0.3187	0.6109	0.7238	0.4469	0.8996	0.6183	0.6269	0.1874	0.2228
C7orf31_79030_AD	0.8646	1	1	0.8246	1	1	0.7712	0.7961	0.8502	0.895954	0.8929	1	1	1	0.7801	0.9039	1	0.7473	0.895954	0.6013	1	1	0.8541	0.7269	1	0.895954	0.895954	1	0.895954	0.6863	1	0.8765	1	1	0.7884	0.8541	1	1	0.7395	0.713	0.816	1	1	0.8613	1	1	0.816	0.8541	0.7961
HNRNPA2B1_79035_AA	0.2348	0.1599	0.278	0.2185	0.204	0.0849	0.2344	0.1675	0.1403	0.0882	0.248	0.1526	0.1697	0.2343	0.2866	0.1781	0.1917	0.3872	0.1098	0.2917	0.2207	0.4537	0.1285	0.1358	0.2699	0.2085	0.1001	0.3623	0.086	0.2605	0.2824	0.2314	0.2002	0.2744	0.1893	0.2809	0.2921	0.1816	0.1417	0.2254	0.2389	0.3441	0.2918	0.2392	0.5285	0.3492	0.2356	0.1472	0.1961
LSM5_79195_AD	0.1679	0.139	0.2876	0.2199	0.1186	0.2876	0.212	0.0747	0.1462	0	0.144	0.3173	0.1186	0.3499	0.1348	0.3057	0.3771	0.2571	0.2517	0.1794	0.0972	0.212	0.063	0.1521	0.1805	0.0917	0.212	0.3611	0.1919	0.1561	0.2247	0.2876	0.1008	0.1627	0.283	0.2015	0.3499	0.3263	0.3344	0.1521	0.1612	0.1453	0.1715	0.212	0.2441	0.2422	0.3354	0.2641	0.157
ELMO1_79269_AD	0.7437	0.5289	0.6118	0.9538	1	0.754992	0.5208	0.7632	0.5652	0.8575	0.4321	1	0.7437	0.652	0.5275	0.7027	0.6258	0.4579	0.4622	0.8764	0.9355	1	0.7632	0.8238	0.7027	0.6496	0.754992	0.5729	0.6824	1	0.8713	0.5843	0.6592	1	0.7326	0.6496	1	0.7579	0.7963	0.9116	0.8286	0.78	1	0.8073	0.6394	0.9437	0.7851	0.8713	0.7632
COA1_79339_AD	0.6617	0.1848	0.4086	0.4595	0.2767	0.2308	0.3717	0.3394	0.4304	0.4147	0.4717	0.2385	0.5434	0.498	0.4247	0.4016	0.4335	0.3097	0.5521	0.6603	0.6801	0.336	0.4071	0.5012	0.4195	0.5464	0.312	0.3832	0.525	0.4498	0.2787	0.3398	0.2418	0.5738	0.4767	0.4234	0.312	0.2671	0.3405	0.5763	0.5001	0.3344	0.4352	0.4266	0.423527	0.3894	0.5152	0.3153	0.4048
POLM_79449_AD	0.7429	0.558	0.7576	0.642	0.6712	0.877	0.6208	0.7844	0.8746	0.781675	0.6774	0.7125	0.7277	0.7984	0.6389	0.7268	0.857	0.8134	0.9194	0.8232	0.8534	0.7948	0.754	0.7014	0.9442	0.7623	0.8968	0.9176	0.8542	0.821	0.9077	0.7845	0.8591	0.794	0.7411	0.8629	0.7114	0.8734	0.773	0.8392	1	0.811	0.7867	0.7682	0.9242	0.7491	0.724	0.8624	0.761
POLM_79454_AA	0.7448	0.9237	0.7059	0.6965	1	0.698114	0.7438	0.7791	0.9312	0.698114	0.698114	0.698114	1	0.7336	0.6833	0.7376	1	0.6664	0.6644	0.7766	0.743	0.6314	0.698114	0.8153	0.7078	1	1	0.7777	0.698114	0.8153	0.5787	0.845	0.8861	0.8281	0.5357	0.5811	0.5056	0.7435	0.6337	0.5059	0.774	0.5569	0.4593	0.7433	0.8416	0.5691	0.4847	0.6926	0.7445
HUS1_79618_AD	0.2967	0.3253	0.1434	0.3033	0.1771	0.1733	0.2221	0.2151	0.323	0.2736	0.2541	0.1754	0.3761	0.3761	0.2866	0.2404	0.2113	0.4401	0.1673	0.2087	0.221	0.2736	0.3367	0.3388	0.2419	0.4197	0.1798	0.2316	0.1385	0.3453	0.131	0.2316	0.1076	0.2007	0.2656	0.4197	0.2806	0.1817	0.1996	0.3761	0.0568	0.3987	0.2316	0.24	0.255084	0.249	0.3967	0.2101	0.1623
FIGNL1_79694_AA	0.595534	0.3391	0.2155	0.7893	0.3485	0.4195	0.1703	1	0.595534	1	0.595534	1	0.3112	0.3025	0.387	0.764	0.6223	1	0.595534	1	0.2857	0.5943	0.595534	0.775	0.644	0.595534	0.595534	0.3423	0.595534	0.4938	1	0.6948	0.2576	1	0.595534	0.2199	0.7381	0.0674	0.0757	1	0.5234	0.3097	0.5498	0.6852	1	0.4434	0.7757	0.1336	0.3139
WBSCR22_80010_AD	0.4632	0.3625	0.3489	0.389	0.32	0.3609	0.4611	0.3726	0.4396	0.32	0.5446	0.8666	0.4295	0.32	0.3148	0.4586	0.8198	0.4502	0.8247	0.5666	0.32	0.3959	0.3577	0.3754	0.3929	0.4295	0.2312	0.2073	0.5025	0.3704	0.3377	0.32	0.2429	0.32	0.4946	0.5143	0.393259	0.3651	0.4543	0.5641	0.6154	0.2609	0.5385	0.4555	0.4516	0.5503	0.2609	0.3342	0.4516
ELN_80043_AA	0.0874	0.6241	0.2374	0.1215	0.299016	0.299016	0.2933	0.0817	0.5923	0.299016	0.2823	0.1719	0.1886	0.4964	0.6241	0.2287	0.2933	0.6035	0.5093	0.0399	0.1719	0.056	0.1088	0.2319	0.1424	0.4301	0.299016	0.6241	0.1095	0.3325	0.2167	0.3563	0.4536	0	0.056	0.3948	0.0647	0.3218	0.3722	0.0623	0.4536	0.0508	0.2933	0.1917	0.3495	0.0862	0.242	0.3117	0.299016
STYXL1_80154_AD	0.428	0.4563	0	0.2828	0.555	0.5874	0.3596	0.3531	0.2792	0.4541	0.3612	0.3194	0.2234	0.3704	0.2465	0.3054	0.368513	0.3314	0.3693	0.2899	0.1796	0.1955	0.3073	0.4758	0.2781	0.2935	0.3047	0.2831	0.3468	0.2222	0.3178	0.2474	0.2424	0.5034	0.4042	0.4076	0.7806	0.4592	0.4206	0.368513	0.4383	0.458	0.5515	0.4797	0.4062	0.5538	0.7029	0.4744	0.3742
STYXL1_80157_AD	0.2304	0.2234	0.3615	0.2225	0.1821	0.4222	0.1074	0.2105	0.1783	0.1268	0.2256	0.4131	0.2797	0.1274	0.1043	0	0.3626	0	0	0.1346	0.4541	0.4049	0.3252	0.2323	0.1138	0.2706	0.1422	0.1822	0.1083	0	0.0357	0.1004	0.2197	0.2154	0.1521	0.2729	0.2891	0.1373	0.1024	0.4502	0.2531	0.3604	0.2156	0.0858	0.4318	0.3318	0	0.22	0.1983
DMTF1_80301_AA	0.276041	0.548	0.3566	0.2573	0.342	0.276041	0.1876	0.178	0.276041	0.276041	0.2573	0.156	0.2573	0.2062	0.3986	0.316	0.2573	0.1361	0.276041	0.2133	0.276041	0.222	0.276041	0.3661	0.1477	0.276041	0.276041	0.2395	0.276041	0.3566	0.3082	0.306	0.3726	0.3022	0.1293	0.342	0.3311	0.1119	0.2573	0.2013	0.3311	0.2062	0.1952	0.1984	0.241	0.3469	0.2062	0.342	0.1334
DMTF1_80302_AA	0.242	0.3019	0.3617	0.2156	0.2991	0.2669	0.1551	0.2266	0.1666	0.3463	0.2018	0.2444	0.2558	0.3201	0.316	0.3078	0.2143	0.1893	0.262987	0.2564	0.0963	0.3323	0.1925	0.2421	0.1138	0.1777	0.262987	0.2982	0.262987	0.3277	0.3989	0.3375	0.4625	0.3952	0.1753	0.3481	0.3438	0.1407	0.1612	0.3184	0.3312	0.3396	0.205	0.3001	0.4322	0.4507	0.1895	0.249	0.1128
DMTF1_80303_AA	0.3406	0.2842	0.5276	0.4665	0.4728	0.5396	0.4551	0.594	0.2434	0.502394	0.4413	0.6582	0.5253	0.6625	0.4348	0.5152	0.4606	0.6177	0.502394	0.5829	0.2994	0.6575	0.2248	0.3772	0.4429	0.665	0.502394	0.5911	0.502394	0.4905	0.6163	0.5661	0.6105	0.6224	0.6025	0.5255	0.5307	0.5889	0.3802	0.6649	0.5289	0.6832	0.5392	0.6536	0.7221	0.6223	0.5033	0.4132	0.4737
KRIT1_80429_AD	0.8265	0.5811	0.7829	0.7238	0.7367	0.7825	0.7992	0.8833	0.7906	0.5831	0.9412	0.6496	0.7707	0.8366	0.6323	0.773	0.7555	0.8883	0.772519	0.6964	0.8988	0.9067	1	0.9204	1	0.6095	1	0.8288	0.772519	0.7499	1	0.6753	0.9082	1	0.8669	0.7747	0.7345	0.8946	0.9322	0.8132	0.8966	0.8284	0.6391	0.845	0.772519	0.8037	0.8105	0.8526	0.5355
SAMD9L_80450_AD	0.9058	0.6081	0.7502	0.73	0.6003	0.897	0.6431	0.7185	0.5457	0.76622	0.8079	0.6926	0.7828	0.7676	0.9249	0.7936	0.6838	0.7828	0.76622	0.7883	0.8668	0.7438	0.76622	0.7179	0.7104	0.76622	0.76622	0.73	0.76622	0.7828	1	0.6003	0.76622	0.5195	0.76622	0.9153	0.6731	0.7145	0.8106	0.8079	0.7563	0.8022	0.8158	0.5836	0.76622	0.6853	0.8106	0.8022	0.6333
PPP1R9A_80517_AD	0.4064	0.4326	0.1268	0.4656	0.2584	0.324	0.4207	0.5111	0.3952	0.433824	0.5284	0.545	0.6039	0.1484	0.276	0.2531	0.3034	0.2741	0.433824	0.3034	0.4326	0.4758	0.734	0.3952	0.8133	0.433824	0.433824	0.433824	0.433824	0.433824	1	0.5374	0.5374	0.4656	0.615	0.3526	0.3034	0.4365	0.3674	0.5922	0.2719	0.6354	0.4326	0.4107	0.433824	0.5213	0.4894	0.2921	0.3567
ZNF655_80669_AA	0	0	0.24	0.1441	0.1267	0.0803	0.1486	0.2307	0.123	0.162569	0.2191	0.156	0.1441	0.0378	0.1947	0.1303	0.162569	0.0894	0	0.1718	0.2508	0.0894	0.162569	0.2612	0.0559	0.1054	0.0948	0.3663	0	0.0752	0.1971	0.0948	0	0.0728	0.162569	0.3438	0.1515	0.0973	0.085	0	0	0.0991	0.4051	0.1549	0.162569	0.2699	0.44	0.0648	0.057
ZSCAN25_80707_AD	0.6966	0.8427	0.775	0.6048	0.763077	0.763077	0.71	0.5674	0.7281	0.763077	0.5794	0.6966	0.7537	0.9087	0.8259	0.9414	0.7928	0.7281	0.763077	0.9245	0.8732	0.9146	0.5605	0.7812	0.9356	0.7537	0.763077	0.8877	0.763077	0.8938	0.6711	0.7683	0.763077	1	0.763077	0.9387	0.8516	0.763077	0.8877	0.763077	0.7928	0.763077	0.5725	0.4595	0.763077	0.8667	0.6966	0.5223	0.8427
TAF6_80900_AD	0.4502	0.6574	0.4105	0.575	0.4006	0.4448	0.5925	0.6051	0.5983	0.256	0.5383	0.4408	0.255	0.6963	0.5604	0.5421	0.6463	0.3924	0.6287	0.3715	0.341	0.7427	0.372	0.4091	0.5868	0.5311	0.383	0.5746	0.3906	0.6524	0.437	0.517	0.5891	0.6099	0.5514	0.6904	0.4073	0.3712	0.3202	0.6953	0.5889	0.4673	0.3211	0.7189	0.8669	0.6844	0.3424	0.7151	0.602
ZCWPW1_80948_AD	0.0272	0.1005	0.2633	0.0272	0.132753	0.132753	0.0208	0	0.132753	0.132753	0.0309	0.132753	0.0473	0.1005	0.1225	0.0628	0.082	0.082	0.132753	0.1435	0.1826	0.1208	0.132753	0.0218	0.0428	0	0.132753	0.1939	0.132753	0.132753	0.132753	0.2467	0.1607	0.132753	0.1826	0.2034	0.4268	0.1607	0	0.1132	0.1296	0.2114	0.2677	0.2156	0.132753	0.2842	0.3583	0.1005	0.06
ACHE_81027_AA	0.2863	0.475059	0.3922	0.3768	0.475059	0.6653	1	0.475059	0.2681	0.475059	0.6108	0.475059	0.3954	0.2818	0.4109	0.6401	1	0.3546	0.3597	0.7455	0.4618	0.3582	0.1462	0.2074	0.4648	0.4451	1	0.3857	0.332	0.5825	0.3653	0.2182	0.475059	0.4985	0.3435	0.3857	0.4342	0.2139	0.2974	0.475059	1	0.3857	0.2863	0.475059	0.324	0.4633	0.2951	0.485	0.4557
FIS1_81055_AD	0.3538	0.33826	0.2812	0.3818	0.6449	0.33826	0.3625	0.33826	0.43	0.33826	0.194	0.4625	0.5946	0.3697	0.2953	0.4156	0.33826	0.3333	0.1573	0.2355	0.1636	0.1636	0.3697	0.1901	0.2313	0.3886	0.1726	0.4881	0.4616	0.2812	0.3301	0.5885	0.33826	0.33826	0.3976	0.4587	0.5399	0.2268	0.442	0.5182	0.4797	0.5946	0.456	0.2458	0.3697	0.4797	0.2953	0.3346	0.1964
POLR2J3_81117_AA	0.4335	0.3904	0.1698	0.287	0.1935	0.2866	0.2159	0.1918	0.3343	0.4563	0.2957	0.3738	0.355	0.3318	0.4004	0.4592	0.4544	0.4083	0.7349	0.3427	0.2681	0.3737	0.4426	0.5686	0.4018	0.2354	0.4436	0.3948	0.4788	0.6749	0.4546	0.5205	0.5184	0.5267	0.7261	0.5105	0.3744	0.2743	0.4352	0.3593	0.2277	0.3904	0.3797	0.2545	0.5427	0.4597	0.424	0.2245	0.1172
POLR2J2_81128_AA	0.4341	0.4452	0.1712	0.3725	0.2798	0.3836	0.2172	0.2009	0.3696	0.5033	0.3001	0.3901	0.3934	0.3969	0.4481	0.5561	0.4728	0.4651	0.7622	0.4008	0.3095	0.4833	0.46	0.8401	0.4319	0.3058	0.6265	0.4644	0.5303	0.7223	0.5148	0.5511	0.5468	0.6333	0.7378	0.5665	0.4152	0.2892	0.4905	0.3862	0.2361	0.4541	0.4388	0.2603	0.5785	0.4932	0.4947	0.2317	0.1241
FAM185A_81137_AD	0.795	0.8374	0.5191	0.6505	0.65221	0.521	0.6554	0.3272	0.3053	1	0.5722	0.3843	0.8489	0.65221	0.6868	0.6491	0.3705	0.6251	1	0.7279	0.8356	0.606	0.9217	0.4951	0.7176	0.6945	0.6815	0.7356	0.8858	0.6161	1	0.5116	0.5552	0.65221	0.5285	0.755	0.8341	0.6257	0.4713	0.65221	0.8438	0.4533	0.6247	0.3691	0.6529	0.8092	0.7796	0.5577	0.5642
HBP1_81336_AD	0.3762	0.515	0.4404	0.3956	0.4015	0.4479	0.3917	0.4188	0.3712	0.3876	0.3433	0.3683	0.3954	0.4295	0.2351	0.4023	0.3583	0.4114	0.287	0.0927	0.3137	0.3687	0.4212	0.3877	0.5997	0.5245	0.6525	0.5495	0.3887	0.4413	0.3134	0.4279	0.49	0.224	0.4143	0.4416	0.3702	0.5073	0.2544	0.3003	0.4606	0.4264	0.4463	0.249	0.3876	0.3395	0.3684	0.4184	0.4763
DUS4L_81343_AD	0.3133	0.1563	0.5597	0.4063	0.3697	0.2268	0.5182	0.3456	0.1353	0.334895	0.1497	0.2424	0.4797	0.4944	0.2626	0.2481	0.1153	0.456	0.334895	0.4327	0.1732	0.311	0.3194	0.1549	0.3697	0.334895	0.0683	0.4014	0.3056	0.5946	0.451	0.4389	0.1279	0.3427	0.1636	0.1636	0.3346	0.1636	0.1946	0.4131	0.3886	0.4842	0.3427	0.2163	0.4944	0.451	0.1279	0.3133	0.3697
IRF5_81733_AA	0.8381	0.643505	0.8768	0.6402	0.937	0.6331	0.4803	0.5189	0.643505	0.4472	0.531	0.89	0.7882	0.581	0.6937	0.538	0.7444	0.643505	0.4472	0.649	0.6402	0.4925	0.643505	0.6691	0.65	0.5189	0.5641	0.66	0.6016	0.575	0.643505	0.2699	0.6444	0.9167	0.5761	0.643505	0.6331	0.66	0.5016	0.7213	0.6458	0.9209	0.5482	0.7689	0.3014	0.649	0.7069	0.5822	0.5928
CALD1_81861_AD	0.7527	0.8276	0.7788	0.9128	0.7946	0.4984	0.8897	0.5551	0.6322	0.731706	0.848	0.6878	0.9183	0.6951	0.6336	0.5678	0.6848	0.8306	1	0.8317	0.7219	0.6861	0.8218	0.8498	0.7719	0.7868	1	0.718	0.9051	0.6587	0.8233	0.7304	0.7059	0.8408	0.742	0.8407	0.8127	0.7407	0.6396	0.8332	0.5669	0.6706	0.7539	0.6968	1	0.8274	0.8052	0.5306	0.6326
C7orf49_81877_AD	0.8863	0.695	0.6293	0.6683	0.5964	0.2985	0.4455	0.4879	0.2613	0.5986	0.6104	0.5754	0.7837	0.7108	0.6112	0.8048	0.6751	0.465	0.5365	0.6681	0.7319	0.7303	0.8389	0.6712	0.5729	0.5992	0.3071	0.5812	0.7009	0.8357	0.6046	0.5358	0.561	0.7472	0.6205	0.5944	0.5643	0.4389	0.7884	0.7738	0.674	0.7943	0.6019	0.5303	0.8402	0.6783	0.4543	0.5145	0.6012
C7orf49_81878_AD	0.4023	0.5363	0.347	0.4061	0.519	0.5867	0.4333	0.4076	0.3661	0.1507	0.6601	0.3729	0.4231	0.5342	0.3651	0.5167	0.256	0.4836	0.5974	0.2216	0.4926	0.3872	0.6816	0.425	0.4171	0.3944	0.5244	0.7118	0.5939	0.7156	0.3594	0.5412	0.4076	0.3702	0.4909	0.6879	0.5782	0.4729	0.4068	0.3602	0.3859	0.4398	0.3984	0.3608	0.8724	0.4151	0.4833	0.4838	0.5247
CNOT4_81888_AD	0.3995	0.3583	0.3461	0.5844	0.2743	0.3769	0.4162	0.5186	0.2942	0.4205	0.426	0.4305	0.5877	0.4942	0.4219	0.4168	0.4606	0.3692	0.391582	0.2964	0.2209	0.3932	0.6447	0.3414	0.4305	0.6447	0.391582	0.3975	0.391582	0.3932	0.4995	0.3822	0.292	0.7313	0.2743	0.2058	0.292	0.4006	0.4663	0.2951	0.2182	0.7023	0.4942	0.3618	0.3414	0.4942	0.553	0.4081	0.4284
KIAA1549_81938_AA	0.8534	0.8717	0.5189	0.8191	0.9209	0.795361	0.8381	0.6016	0.5641	0.795361	0.8191	0.795361	0.8938	0.8768	0.8859	0.7639	0.795361	0.9315	0.795361	0.8191	0.7213	0.9006	0.8661	0.7806	0.795361	0.7545	0.795361	0.66	0.636	0.795361	0.6832	0.5641	1	1	0.7639	0.6083	0.7444	0.5641	0.7775	0.7512	0.4925	0.6801	0.8534	0.8859	0.9283	0.6272	0.7753	0.8118	0.6402
ZC3HAV1_81941_AD	0.4967	0.4528	0.6872	0.3865	0.1518	0.3385	0.3747	0.5197	0.3709	0.5637	0.4024	0.3828	0.2904	0.4714	0.4871	0.2935	0.3677	0.2834	0.1887	0.3417	0.3408	0.2917	0.5271	0.3351	0.3715	0.5044	0.1216	0.4659	0.371116	0.2442	0.3458	0.4102	0.411	0.3677	0.5892	0.3136	0.2297	0.6597	0.4027	0.268	0.291	0.4278	0.3528	0.3152	0.371116	0.4967	0.3458	0.3503	0.3477
HIPK2_81963_AA	0.6332	0.7368	0.5888	0.603	0.4646	0.8293	0.7387	0.6833	0.7085	0.7009	0.6701	0.6225	1	0.5752	0.6878	0.8374	0.6345	0.9143	0.733574	0.6643	0.765	0.7352	0.733574	0.5101	1	0.6097	0.8569	0.7673	0.8064	0.7847	0.6888	0.5101	0.8713	0.7961	0.7764	0.6097	0.7719	0.6756	0.6207	0.7412	0.7847	0.641	0.5813	0.681	0.733574	0.6097	0.6457	0.6625	0.6097
SLC37A3_81987_AA	0.0361	0.0123	0.1525	0.0307	0.1449	0.0958	0.0509	0.1072	0.041	0.0368	0.0272	0.0601	0.0948	0.1861	0.0827	0.0776	0.1031	0.1622	0.122194	0.1163	0.1536	0.222	0.0576	0.0558	0.0304	0.035	0.1079	0.2915	0.035	0.2251	0.1312	0.1488	0.0838	0.1362	0.1163	0.1694	0.1383	0.1094	0.0549	0.2765	0.092	0.1742	0.2612	0.0801	0.8431	0.1781	0.1847	0.0198	0.0292
GSTK1_82080_AD	0.8513	0.7312	0.7687	0.6968	0.8125	0.7773	0.7403	0.7445	0.7656	0.6591	0.8257	0.7833	0.8571	0.8309	0.9075	0.7301	0.8909	0.89	0.888	0.8931	0.7587	0.9252	0.6744	0.7545	0.9314	0.8006	0.8368	0.8867	0.7386	0.9255	0.8483	0.8434	0.8689	0.8509	0.8456	0.9005	0.9455	0.8665	0.7442	0.8952	0.9018	0.9066	0.9207	0.7654	0.9328	0.914	0.8814	0.7357	0.6789
FAM115A_82127_AD	0.8276	0.7852	0.8421	0.6818	0.5977	0.8205	0.7971	0.742	0.8128	0.763642	0.5808	0.7742	0.7123	0.6969	0.7941	0.8536	0.764	0.8205	0.763642	0.7789	0.7059	0.9114	0.6957	0.7812	0.764	1	0.763642	0.9603	0.763642	0.8293	0.6557	0.6789	0.6957	0.7742	0.3226	0.7461	0.8432	0.6957	0.7586	1	0.932	0.7342	0.7342	0.8552	0.763642	0.8727	0.8421	0.7721	0.9114
ZNF783_82188_AD	1	1	0.8431	1	0.7943	0.846955	1	1	0.846955	0.846955	0.787	0.7368	0.8645	0.7791	0.8431	1	0.7706	0.7774	0.8137	0.8012	0.846955	0.8471	0.846955	0.851	1	0.7406	1	0.7731	0.4847	1	0.7967	1	0.8246	0.7614	0.7158	0.8973	0.9404	0.7967	1	0.8732	0.8296	0.8193	0.9069	0.9366	0.8732	0.9124	0.8362	0.6018	1
ZNF746_82201_AA	0.4293	0.5865	0.5301	0.5828	0.5417	0.5134	0.6111	0.5211	0.7632	0.560041	0.6074	0.4916	0.5473	0.4678	0.6691	0.45	0.560041	0.5801	0.560041	0.6592	0.293	0.3453	0.4916	0.6218	0.4916	0.4916	0.560041	0.392	0.560041	0.5473	0.6745	0.3403	0.5301	0.5473	0.5919	0.6031	0.7074	0.6237	0.6803	0.7206	0.5473	0.6031	0.4622	0.5632	0.560041	0.4318	0.4916	0.5865	0.6171
ZNF467_82205_AA	0.8453	0.7318	0.6903	0.8793	0.7134	0.8016	0.8789	0.6705	0.6304	0.6341	0.7837	0.7174	0.7574	0.6942	0.739	0.8084	0.849	0.8031	0.7489	0.7968	0.8669	0.7477	0.8134	0.8314	0.8174	0.6722	0.7444	0.9118	0.729	0.8503	0.6509	0.7336	0.6908	0.732	0.9088	0.8418	0.7892	0.8953	0.849	0.6586	0.8067	0.6746	0.7485	0.7757	0.6462	0.8074	0.7691	0.7738	0.8997
REPIN1_82233_AA	1	0.8441	0.853	0.8212	0.833003	0.7437	0.8376	0.8476	0.8457	0.833003	0.8713	0.7719	0.8417	0.8969	0.9447	0.853	0.7946	0.8024	0.833003	1	0.7946	1	0.6286	0.9355	0.8286	1	0.833003	0.8097	0.833003	0.8788	0.7206	1	0.833003	0.833003	0.833003	0.8286	1	0.8131	0.7719	0.8969	0.9207	0.8073	1	0.853	0.7632	1	0.6803	0.833003	0.8596
REPIN1_82234_AA	0.5618	0.712	0.6633	0.5588	0.5873	0.7243	0.7339	0.7112	0.6821	1	0.7179	0.7243	0.4453	0.6155	0.7572	0.6215	0.6051	0.6941	0.657381	0.6864	0.6118	0.8553	0.7441	0.8733	0.6633	0.6365	0.657381	0.4962	0.6968	0.518	0.8062	0.7179	0.4508	0.6633	0.6968	0.4267	0.6548	0.904	0.6436	0.6633	0.6051	0.6917	0.6934	0.6215	0.4578	0.8518	0.7613	0.6633	0.6146
TMEM176A_82265_AD	0.2391	0.2161	0.2434	0.3577	0.3818	0.6174	0.3982	0.3154	0.4648	0.1618	0.1038	0.5366	0.5292	0.3982	0.5366	0.3996	0.3875	0.3615	0.4388	0.5054	0.373	0.3705	0.7299	0.4061	0.4311	0.5107	0.4273	0.3165	0.4437	0.5314	0.4648	0.4783	0.4666	0.3904	0.3915	0.395599	0.3762	0.3508	0.2568	0.215	0.6258	0.2839	0.2926	0.2729	0.3254	0.3461	0.2554	0.408	0.526
FASTK_82342_AD	0.2215	0.3486	0.4482	0.3365	0.2669	0.2868	0.1742	0.4257	0.0776	0.2145	0.2093	0.443	0.3165	0.293	0.264	0.2203	0.4353	0.3168	0.1318	0.2677	0.2714	0.3532	0.232	0.3037	0.382	0.3404	0.2876	0.3739	0.3219	0.4202	0.4047	0.3215	0.303	0.3476	0.3188	0.3438	0.4835	0.365	0.4188	0.2378	0.3653	0.4539	0.5178	0.3239	0.3421	0.4609	0.4262	0.3859	0.3094
PRKAG2_82394_AA	0.5211	0.7683	0.7632	0.6756	0.5919	0.7206	0.7074	0.7267	0.6803	1	0.853	0.8376	0.729088	0.9063	0.8713	0.5801	0.6851	0.5972	0.729088	0.8024	0.6351	0.853	0.5116	0.8201	0.6727	0.729088	0.729088	0.7606	0.729088	0.7437	0.6031	0.7586	0.7154	0.7838	0.7206	0.6898	0.7154	0.78	0.5401	0.6237	0.6097	0.7606	0.7074	0.62	0.729088	0.7132	0.8131	0.6592	0.7267
PAXIP1-AS2_82430_AA	0.7458	0.6617	0.6348	0.7788	0.8776	0.7458	0.7894	0.8432	0.7385	0.82062	0.8302	1	0.6389	0.9253	0.7559	0.9271	0.6617	0.7415	1	0.8254	0.7964	0.7228	0.6348	0.8776	0.6953	1	0.8391	0.8751	0.7228	0.7385	0.8091	0.8776	0.705	0.7385	0.867	0.8776	0.7964	1	0.8114	0.8776	0.6419	0.8823	0.7652	0.8471	0.9072	0.9172	0.8029	0.8867	0.8391
RNF32_82455_AA	0.8134	0.6748	0.620194	0.744	0.3218	0.4708	0.5093	1	0.7888	0.620194	0.620194	0.612	0.533	0.4991	0.6089	0.3634	0.620194	0.5923	0.620194	0.6241	0.8616	0.3563	0.4829	0.5546	0.5546	0.8925	0.8328	0.3966	0.5853	0.7792	0.4829	0.5546	0.6427	1	0.8059	0.8875	0.8203	0.5546	0.5923	0.6658	0.533	0.8328	1	0.2756	0.620194	0.7977	0.5546	0.7296	0.6595
ZNF596_82544_AD	0.7932	0.8847	0.5862	0.6763	0.9097	0.8119	0.7189	0.7421	0.6912	1	0.5899	1	0.7825	0.6396	0.6491	0.9414	1	0.6863	0.852584	0.9244	0.8935	0.7535	1	0.9152	0.8935	0.8847	1	0.8618	1	0.803	0.746	0.8907	0.788	0.8618	0.7189	0.9557	0.9388	1	0.9034	0.9505	0.6092	0.8292	0.818	0.9116	0.8714	0.951	0.7251	0.7705	0.9307
ANGPT2_82579_AA	0.4129	0.4583	0.3757	0.4462	0.392	0.361684	0.4085	0.2165	0.1769	0.5801	0.3559	0.4129	0.4916	0.3672	0.3259	0.1884	0.361684	0.4014	0.361684	0.3259	0.4362	0.4476	0.4781	0.0882	0.361684	0.361684	0.361684	0.2165	0.361684	0.392	0.2567	0.361684	0.361684	0.2789	0.3259	0.3645	0.293	0.5154	0.3403	0.311	0.097	0.1295	0.3596	0.4362	0.3495	0.3745	0.1824	0.2165	0.361684
NEIL2_82636_AD	0.2847	0.372	0.1765	0.3777	0.3124	0.4778	0.1994	0.4828	0.2178	0.2688	0.2461	0.2782	0.2862	0.3956	0.314	0.3901	0.2509	0.3267	0.4845	0.2223	0.2326	0.4167	0.2791	0.3343	0.2875	0.1027	0.348	0.371	0.3244	0.247	0.4523	0.2521	0.2591	0.2582	0.2701	0.3773	0.3294	0.2768	0.364	0.1845	0.4868	0.2862	0.5972	0.4489	1	0.489	0.3777	0.339	0.485
FAM86B1_82683_AD	0.4216	0.308	0.3983	0.4729	0.5156	0.3085	0.5793	0.4951	0.4348	0.4548	0.2557	0.5031	0.4579	0.5103	0.4926	0.4203	0.6057	0.4298	0.3418	0.4473	0.5661	0.3452	0.3572	0.5665	0.3743	0.4692	0.5491	0.344	0.615	0.3789	0.6715	0.5139	0.4831	0.6207	0.6298	0.5249	0.4702	0.5355	0.3969	0.5733	0.385	0.6364	0.5009	0.3137	0.3556	0.784	0.5868	0.4341	0.2881
KIAA1456_82761_AD	0.2848	0.5871	0.4837	0.2699	0.3929	0.297	0.4251	0.6726	0.4731	0.5443	0.6951	0.5137	0.4747	0.6663	0.5908	0.402	0.5966	0.571	0.4251	0.557	0.511737	0.4251	0.5641	0.5641	0.3996	0.3813	0.4702	0.6246	0.3929	0.5182	0.7784	0.6089	0.6157	0.5259	0.511737	0.5361	0.511737	0.511737	0.4965	0.4251	0.51	0.7213	0.5755	0.4682	0.388	0.5259	0.4251	0.4448	0.5742
NPM2_82922_AD	0.6736	0.7225	0.5092	0.7665	0.571	0.6564	0.4714	0.5472	0.7574	0.6687	0.5672	0.5477	0.718	0.8457	0.7912	0.6369	0.6825	0.7562	0.6925	0.3836	0.7926	0.6521	0.7657	0.5112	0.6017	0.6483	0.5876	0.6923	0.6683	0.7512	0.7714	0.6611	0.8763	0.5124	0.7376	0.6606	0.7174	0.6743	0.6538	0.8536	0.786	0.8239	0.7609	0.6031	0.7386	0.6707	0.4332	0.707	0.6119
NPM2_82923_AD	0.9514	0.8692	0.8353	0.7067	0.8683	0.8123	0.8683	0.8541	0.9573	0.7936	0.5874	0.842	0.8527	1	0.8707	0.8756	0.7026	0.8995	0.5342	1	0.7482	0.8606	0.941	0.7299	0.8046	0.8876	0.8769	0.8765	0.9045	0.8344	0.8872	0.8347	0.7936	0.891	0.9056	0.9259	0.8317	0.7475	0.8365	0.8648	0.8667	0.8279	0.9317	0.8959	0.7062	0.8928	0.7376	0.8103	0.8809
BMP1_82987_AA	0.5361	0.6715	0.9162	0.8421	0.7588	1	1	0.7887	1	0.810551	0.7887	1	0.8276	0.8052	0.878	0.7134	0.810551	0.6703	0.810551	0.874	0.7	0.6667	0.810551	1	1	0.7368	0.878	0.6939	0.4444	1	1	0.8276	0.9162	0.8352	0.6753	0.8649	0.8263	0.5714	0.898	0.8125	0.9162	0.7091	0.7436	0.8636	0.5631	0.8837	0.8913	0.908	0.8101
BMP1_82992_AA	0.1163	0.1599	0.1961	0.2213	0.1241	0.1876	0.218	0.1968	0.0924	0.1157	0.0739	0.2052	0.1884	0.161	0.157	0.2078	0.1786	0.1034	0.3116	0.2209	0.1755	0.4785	0.2704	0.1401	0.3126	0.3598	0.2798	0.3627	0.2559	0.4411	0.281	0.1986	0.2393	0.3464	0.3617	0.2914	0.4152	0.1609	0.1405	0.3219	0.1669	0.3108	0.3785	0.2418	0.4867	0.3894	0.3522	0.1045	0.0737
BMP1_82995_AA	0.0885	0.2545	0.4376	0.4055	0.3017	0.1234	0.3639	0.3179	0.1291	0	0.1166	0.4131	0.316	0.35	0.2383	0.3418	0.273	0.2274	0.305439	0.2181	0.1618	0.5074	0.2604	0.2604	0.1571	0.2383	0.2604	0.5199	0.1353	0.4131	0.3194	0.451	0.2944	0.3277	0.2329	0.43	0.4204	0.2946	0.1473	0.3152	0.2754	0.3048	0.3675	0.3716	0.4964	0.3334	0.5176	0.2368	0.2877
PDLIM2_83030_AD	0.7928	1	0.5295	1	0.8182	1	0.894249	0.7827	0.894249	0.894249	0.8746	0.7123	0.7352	0.7928	1	0.9265	1	0.871	1	1	0.8671	1	0.9253	0.9043	0.7059	1	1	0.7298	1	0.7213	0.894249	1	1	1	1	0.9	0.8813	0.8105	0.7952	1	1	1	0.8587	0.8874	1	1	0.8182	0.9184	0.8182
C8orf58_83031_AA	0.5957	0.6836	0.4955	0.6689	0.7021	0.7586	0.7186	0.7021	0.44	0.611358	0.6274	0.5025	0.6387	0.567	0.611358	0.4251	0.611358	0.4598	0.611358	0.7795	0.44	0.5333	0.5934	0.4074	0.7021	0.6111	0.7021	0.5193	0.6438	0.44	0.557	0.541	0.8073	0.5789	0.386	0.6576	0.5525	0.5053	0.44	0.4583	0.8034	0.6511	0.4916	0.6535	0.4167	0.5882	0.7186	0.557	0.567
SLC25A37_83082_AA	0.4493	0.4373	0.7445	0.41	0.7691	0.818	0.4373	0.5886	0.4864	0.5382	0.3533	0.5657	0.7367	0.6143	0.4021	0.6296	0.6772	0.512	0.3682	0.785	0.4766	0.8423	0.189	0.5978	0.7734	0.5382	0.6772	0.4514	0.1044	0.7445	0.6437	0.6283	0.4927	0.8124	0.7776	0.6686	0.9423	0.4563	0.3083	0.5787	0.8484	0.705	0.7163	0.6827	0.9031	0.8109	0.7507	0.6694	0.6017
SLC25A37_83083_AD	0.7382	0.6467	0.8366	0.6363	0.8555	0.9411	0.6417	0.7902	0.7384	0.7474	0.4908	0.7319	0.8541	0.7178	0.6282	0.8259	0.8056	0.6624	0.4121	0.8827	0.7474	0.8888	0.6152	0.8047	0.8412	0.7513	0.8646	0.6033	0.3983	0.8392	0.7903	0.8325	0.7334	0.9008	0.8751	0.7312	0.9636	0.6137	0.6277	0.6754	0.9389	0.8284	0.7866	0.8302	0.8701	0.8921	0.8232	0.8365	0.7809
WHSC1L1_83394_AD	0.5926	0.5479	0.5926	0.3373	0.1538	0.4706	0.2903	0.3265	0.7755	0.398019	0.2254	0.398019	0.4211	0.5	0.3774	0.4923	0.6751	0.4469	0.398019	0.5333	0.56	0.4211	0.5045	0.4211	0.398019	0.398019	0.398019	0.1655	0.398019	0.398019	0.8533	0.2903	0.398019	0.3956	0.398019	0.4211	0.2092	0.2814	0.5217	0.4211	0.4211	0.56	0.2903	0.4444	0.56	0.4424	0.2254	0.4054	0.2326
TM2D2_83477_AD	1	0.9366	0.8518	0.8235	0.9468	0.9568	0.8645	0.8582	0.8066	0.5095	0.8878	0.8582	0.6804	0.81	0.7512	0.8295	0.8544	0.799	1	0.8236	0.5455	0.6789	0.8875	0.8712	0.8617	0.8109	0.8805	0.8894	0.8459	1	0.54	0.9055	0.8327	0.6615	0.7673	0.7064	0.8604	0.785	0.8846	0.8577	0.9144	0.8311	0.8966	0.7122	0.903	0.903	0.8749	0.8732	0.723
ADHFE1_84004_AA	0.2459	0.466	0.9346	0.4915	0.5935	0.6266	0.5907	0.5472	0.4095	0.3235	0.65	0.617	0.6029	0.552	0.7236	0.8879	0.689	0.6868	0.6444	0.689	0.585	0.7631	0.4889	0.6444	0.8203	0.6312	0.8011	0.6098	0.3766	0.5907	0.689	0.6644	0.7687	0.6625	0.6823	0.892	0.843	0.7704	0.6253	0.6397	0.6137	0.8203	0.9016	0.7444	0.8166	0.8158	0.5545	0.4714	0.2871
E2F5_84326_AA	0.6218	0.7074	0.6423	0.5589	0.5708	0.5301	0.6454	0.525	0.5801	0.7946	0.6592	0.6851	0.6049	0.6989	0.7946	0.7132	0.6929	0.6735	0.7154	0.6111	0.6111	0.7014	0.7632	0.6351	0.6414	0.4293	0.4916	0.7303	0.7241	0.6929	0.4204	0.7437	0.5687	0.7668	0.8286	0.381	0.6727	0.8186	0.4916	0.4916	0.7755	0.853	0.7111	0.6394	0.6074	0.6171	0.8286	0.7586	0.7036
C8orf59_84334_AD	0.0234	0.7511	0.7547	0.0619	0.104	0.0387	0.1069	0.1087	0.0503	0.9638	0.1675	0.8025	0.137	0.2232	0.1117	0.2073	0.0914	0.902	0.9534	0.8454	0.8521	0.9373	0.0382	0.7989	0.7433	0.7909	0.7449	0.1599	0.7402	0.7382	0.0824	0.1803	0.0973	0.8806	0.8663	0.9783	0.2888	0.1675	0.0718	0.8223	0.1436	0.8373	0.8554	0.0809	0.8009	0.8564	0.3697	0.9251	0.6787
GEM_84552_AD	0.8882	1	1	0.7278	0.8966	0.832202	0.6769	0.7223	0.7762	0.832202	0.7617	1	1	0.8934	0.8805	1	0.7467	0.9222	0.8126	0.8468	0.7607	0.917	0.9213	0.6731	0.6744	1	0.832202	0.7429	0.8627	0.7845	0.8989	0.656	0.9428	0.7223	0.8256	1	1	0.8095	0.6408	0.6692	0.6423	0.7494	0.7429	0.6843	0.7865	0.804	0.7885	1	0.832202
NDUFAF6_84599_AD	0.5416	0.3669	0.3063	0.3606	0.4883	0.3719	0.4086	0.4407	0.4674	0.3755	0.4033	0.2581	0.6085	0.4674	0.4216	0.4038	0.6212	0.5255	0.7416	0.3923	0.4059	0.4479	0.2751	0.3388	0.3042	0.3104	0.2616	0.3987	0.4651	0.404789	0.4889	0.3823	0.546	0.3719	0.4577	0.5828	0.5152	0.3063	0.5223	0.2649	0.5244	0.3063	0.5582	0.486	0.3705	0.3646	0.4348	0.43	0.4379
ZNF706_84742_AD	1	1	0.9306	0.848	1	1	1	0.9387	0.8267	0.7192	1	1	0.7621	0.8901	1	0.78	0.6926	1	0.5156	1	0.5731	0.9632	1	1	0.8298	0.6219	1	0.9465	0.6606	0.5852	1	0.7846	1	0.867	0.9057	0.8061	1	1	0.9025	0.8218	1	0.9298	0.925	1	0.968	0.9674	0.9697	1	1
ZNF706_84745_AA	0.5731	0.7118	0.4886	0.3343	0.2207	0.1995	0.5569	0.3116	0.3468	1	0.3612	0.6868	0.5546	0.4661	0.2921	0.5206	0.3535	0.4543	0.2094	0.2899	0.6652	0.3489	0.2463	0.3453	0.4227	0.2969	0.2862	0.5031	0.0569	0.3628	0.4698	0.6832	0.4495	0.5547	0.5756	0.7052	0.3226	0.4478	0.4909	0.3299	0.4067	0.3312	0.1751	0.3503	0.8286	0.6302	0.655	0.1917	0.2253
ENPP2_85006_AD	0.5946	0.789	0.6377	0.569	0.6505	0.6204	0.692615	0.7674	0.6494	0.7788	0.9249	0.569	0.6101	0.6377	0.7419	0.6839	0.7613	0.4889	0.7253	0.655	0.6315	0.6802	0.6696	0.4944	0.6854	0.7154	0.6377	0.7634	0.692615	0.6479	0.692615	0.8288	0.9436	0.7038	0.5946	0.7698	0.6764	0.5066	0.569	0.6377	0.6875	0.5066	0.6711	0.5864	0.5779	0.574	0.5597	1	0.6226
ZHX1_85052_AD	0.2987	0.4856	0.2942	0.3702	0.2591	0.3247	0.1512	0.3144	0.2283	0.2428	0.4558	0.3482	0.3042	0.3441	0.2778	0.3564	0.2078	0.3247	0.347409	0.4072	0.5288	0.4348	0.2428	0.3732	0.2651	0.3247	0.2428	0.3476	0.347409	0.419	0.2311	0.2485	0.5906	0.2343	0.2919	0.3141	0.0999	0.3569	0.2428	0.347409	0.5038	0.3821	0.1855	0.3334	0.347409	0.2901	0.3042	0.2906	0.2276
PHF20L1_85197_AA	0.2684	0.3573	0.4293	0.3618	0.2117	0.3672	0.3006	0.1109	0.2899	0.4583	0.1754	0.3559	0.2249	0.22	0.2909	0.2331	0.3386	0.2915	0.286964	0.2371	0.2293	0.1214	0.0646	0.3626	0.1947	0.2438	0.286964	0.3767	0.1078	0.1769	0.2308	0.2854	0.2567	0.1295	0.2438	0.4085	0.44	0.1737	0.1621	0.525	0.1667	0.2602	0.4488	0.3315	0.286964	0.2602	0.2567	0.2072	0.3259
TSNARE1_85344_AA	0.2293	0.2711	0.5333	0.2753	0.5473	0.5708	0.2015	0.4916	0.1621	0.3086	0.6074	0.3472	0.5708	0.3513	0.3559	0.3559	0.412063	0.4308	0.4204	0.5752	0.4916	0.5732	0.4622	0.5345	0.2711	0.2627	0.2711	0.4699	0.2087	0.4085	0.401	0.3715	0.4293	0.4362	0.3745	0.2165	0.3672	0.45	0.6592	0.4462	0.4037	0.3672	0.4916	0.3767	0.3672	0.4916	0.518	0.293	0.4755
ZFP41_85402_AD	1	0.6664	0.783	0.6087	0.7916	0.78	0.8351	0.782	0.5504	1	0.5486	1	1	0.6309	0.6648	0.7916	0.8069	0.5668	1	1	0.8021	0.8703	0.8241	0.7943	0.8902	1	0.4871	0.4749	1	1	0.6338	0.5556	1	1	0.7267	0.5493	0.8659	0.818	0.8159	0.5134	1	0.65	0.7027	1	0.5326	0.8819	0.3935	0.649	0.5907
ZNF707_85481_AD	0.384	0.5141	0.3373	0.284	0.0711	0.5669	0.3478	0.3148	0.5402	0.412938	0.5926	0.4211	0.3529	0.3942	0.3349	0.5646	0.2443	0.5479	0.5378	0.3217	0.5017	0.5352	0.3636	0.5528	0.55	0.2979	0.0462	0.2516	0.5166	0.5333	0.2062	0.2979	0.398	0.384	0.7442	0.4054	0.1951	0.2716	0.5694	0.459	0.3529	0.3866	0.3419	0.4539	0.2062	0.4392	0.3496	0.2254	0.3529
ZNF707_85482_AA	0.7841	1	1	1	1	0.6617	1	1	1	1	1	1	1	0.8918	1	1	1	1	1	1	1	1	1	1	1	1	1	0.9139	0.6617	1	1	1	0.5828	1	1	0.9072	1	1	1	1	1	1	0.9362	1	1	1	0.8987	1	1
SLC52A2_85580_AD	0.4685	0.6999	0.4295	0.6202	0.5153	0.3848	0.6825	0.5584	0.5497	0.3423	0.6063	0.6299	0.6248	0.6797	0.5526	0.6551	0.3889	0.3658	0.5799	0.1948	0.4879	0.3985	0.6943	0.8596	0.6086	0.5621	0.5304	0.6864	0.6377	0.6054	0.5877	0.6319	0.6344	0.3669	0.5893	0.5371	0.5076	0.7198	0.4506	0.795	0.3372	0.6421	0.8125	0.6662	0.4086	0.6008	0.4349	0.4559	0.7848
ADCK5_85592_AA	0.8255	0.8089	0.8949	0.8188	0.5324	0.823295	0.8924	0.7763	0.7887	0.823295	0.9445	0.8686	0.823295	0.8814	0.7395	0.8398	0.823295	0.8739	0.5448	0.8479	0.9019	0.9211	0.9602	1	0.825	0.9123	0.8688	0.8758	0.9591	0.9122	1	0.7175	0.8777	0.7136	0.7891	0.7437	0.7902	0.887	0.9044	0.6772	1	0.6624	0.8006	0.8981	0.683	0.6744	0.6668	1	1
VPS28_85607_AD	0.615774	0.615774	0.5428	0.6047	1	0.615774	0.615774	0.5892	0.615774	0.615774	0.3697	0.3946	0.5149	0.4873	0.6759	0.624	0.615774	0.4677	0.2781	0.7732	1	0.5128	0.5489	0.4817	0.7361	0.449	0.7546	0.5428	0.6335	0.8878	0.5444	0.7364	0.5946	0.5329	0.2487	0.6438	0.55	0.867	0.7325	0.615774	0.5817	0.5096	0.7434	0.761	0.7198	0.5878	0.8138	0.615774	0.615774
CYHR1_85620_AD	0.749	0.6681	0.7548	0.6425	0.7824	0.5973	0.9172	0.8803	0.6917	1	0.7983	0.7458	0.7107	0.7793	0.6289	0.7732	0.8188	1	0.7633	0.7753	0.8479	0.8221	0.6188	0.8779	0.8099	0.8459	0.6668	0.863	0.8217	0.8935	0.8118	0.8237	0.6648	0.7704	0.6577	0.8574	0.8639	0.7452	0.7276	0.8817	0.6444	0.7922	0.8206	1	0.7059	0.8402	0.6307	0.7494	0.6277
ZNF7_85663_AA	0.2443	0.1538	0.3459	0.398	0.2062	0.3265	0.1951	0.5217	0.1951	0.0941	0.2667	0.2186	0.382454	0.2092	0.2092	0.3587	0.382454	0.3926	0.382454	0.381	0.6452	0.4444	0.382454	0.3636	0.5639	0.5479	0.3774	0.2513	0.382454	0.382454	0.5926	0.3678	0.3731	0.5378	0.6857	0.4407	0.4923	0.459	0.5096	0.2667	0.4211	0.4211	0.6751	0.2667	0.5669	0.6154	0.4923	0.3587	0.3678
ZNF250_85683_AA	0.2828	0.268	0.1995	0.3309	0.1662	0.3545	0.2448	0.1797	0.3355	0.3389	0.3578	0.2721	0.3629	0.2064	0.4227	0.2409	0.695	0.3406	0.29942	0.3389	0.3179	0.2625	0.2217	0.2625	0.3481	0.379	0.1856	0.2887	0.2993	0.3389	0.2868	0.2326	0.4607	0.2625	0.2777	0.2993	0.3326	0.2494	0.5541	0.2993	0.6188	0.3246	0.3389	0.1459	0.2426	0.3762	0.2625	0.2485	0.189
TEK_86043_AD	0.41	0.4085	0.5473	0.4129	0.4362	0.42071	0.4204	0.4916	0.392	0.3259	0.4916	0.2517	0.5211	0.3962	0.3672	0.3647	0.2661	0.3767	0.42071	0.5125	0.3823	0.5517	0.369	0.5607	0.4532	0.392	0.42071	0.4916	0.3495	0.3833	0.4546	0.5134	0.3731	0.4057	0.4744	0.4678	0.3849	0.4916	0.4185	0.4532	0.3403	0.5001	0.4916	0.3513	0.3259	0.4037	0.4266	0.2848	0.381
APTX_86080_AA	0.7196	0.6794	0.4954	0.6866	0.7503	0.7235	0.64	0.5359	0.7266	0.6843	0.6692	0.8577	0.6866	0.4755	0.7176	0.638	0.7484	0.5824	0.5653	0.6817	0.6748	0.6579	0.6163	0.8026	0.7089	0.5023	0.4888	0.5688	0.5521	0.4971	0.6583	0.5844	0.677	0.806	0.611	0.6752	0.7244	0.684	0.8218	0.4297	0.6168	0.6111	0.675	0.5815	0.3391	0.651	0.6225	0.6824	0.6897
FAM219A_86173_AA	0.6286	0.8788	0.6727	0.8131	0.780674	0.8855	0.5752	0.853	0.9063	0.780674	0.7632	0.780674	0.6592	0.7267	0.8165	0.6592	0.6171	0.8227	0.780674	0.6592	0.9393	0.6171	0.7558	0.6592	0.8131	0.7437	0.780674	0.8212	0.8417	0.7946	0.8212	0.8811	0.7074	0.7632	0.9355	0.6745	0.7074	0.9603	0.4462	0.7267	0.7154	0.7343	0.8286	0.7558	0.780674	0.6712	0.853	0.7719	1
FAM219A_86174_AD	0.8574	0.8228	0.7715	0.3877	0.7169	0.513261	0.6128	0.3518	0.4987	0.5587	0.4515	0.513261	0.8744	0.4577	0.6253	0.5587	0.513261	0.5587	0.513261	0.7916	0.689	0.2835	0.5205	0.2835	0.6672	0.4198	0.513261	0.5071	0.5134	0.3877	0.5963	0.2602	0.7169	0.3071	0.3518	0.4529	0.5587	0.4945	1	0.4577	0.4198	0.5351	0.5326	0.6729	0.513261	0.5963	0.4871	0.6729	0.6551
DCTN3_86187_AA	0.8283	0.6053	0.7649	0.7266	0.7307	0.8405	0.7181	0.7229	0.8438	0.5512	0.8047	0.7574	0.6803	0.732	0.851	0.7596	1	0.6935	0.3963	1	0.8005	1	0.3924	0.7932	0.4402	0.376	0.5662	0.72	0.6173	1	0.8108	0.8417	0.8873	0.7982	0.8883	0.8042	0.9286	0.9011	0.2028	0.7981	0.8921	0.7981	0.8117	0.6767	0.8798	0.8657	0.7867	0.8591	0.4096
DCTN3_86188_AD	0.6957	0.5892	0.7545	0.6468	0.5959	0.6711	0.6526	0.7775	0.8111	0.5786	0.6795	0.6307	0.5274	0.6416	0.841	0.6958	1	0.5951	0.2235	1	0.7088	1	0.2789	0.7048	0.4454	0.1243	0.3048	0.6086	0.1514	1	0.7227	0.7279	0.8228	0.7155	0.7409	0.7559	0.8825	0.8432	0.2892	0.6691	0.8101	0.719	0.774	0.5725	0.6976	0.8321	0.6953	0.805	0.3942
SPAG8_86314_AD	0.7924	1	0.697	0.8896	0.7316	0.4589	0.7877	0.6463	1	0.7179	1	0.8042	0.7742	0.7724	1	0.8111	0.858	0.8617	0.8235	0.8298	1	0.8142	0.8012	0.8889	0.8648	0.6666	0.8348	0.8342	0.6117	0.4511	0.8741	0.8738	0.8842	0.799	0.8489	0.9321	0.762	0.715	0.9465	0.8553	0.8716	0.8481	0.7785	0.8166	0.6535	0.8432	0.8159	0.4628	0.7463
TRMT10B_86433_AD	0.435	0.613	0.451	0.7495	0.6787	1	0.6471	0.8069	0.7409	0.6875	0.6292	0.6377	0.6802	0.6764	0.3976	0.6377	0.613	0.682	0.569	0.6812	0.6489	0.5976	0.4681	0.7253	0.5308	0.7984	1	0.6146	0.6875	0.8148	0.7307	0.5963	0.5399	0.7137	0.536	0.537	0.7409	0.7167	0.6032	0.6875	0.6672	0.6501	0.7586	0.7201	0.9317	0.7495	0.6959	0.6535	0.6617
NMRK1_86626_AA	1	0.1847	1	1	0.356	1	0.272	0.2619	1	0.441371	0.1486	0.1697	0.2695	0.2821	0.1963	0.1881	0.2008	0.1715	0.194	1	0.1121	0.3757	0.441371	0.2399	0.3687	0.1565	0.441371	1	0.1363	0.4052	0.4929	0.3589	0.7074	0.441371	1	0.2248	0.6662	0.4065	0.441371	0.5412	0.3157	0.5558	0.9164	0.2991	1	1	0.4186	0.3672	0.2051
AGTPBP1_86732_AA	0.792	0.7476	0.7604	0.8383	0.6286	0.7643	0.6956	0.6007	0.8315	0.4877	0.6471	0.7476	0.514	0.8008	0.6716	0.8839	0.7604	0.792	0.741478	0.7057	0.792	0.7719	0.6134	0.8639	0.792	0.4877	0.741478	0.6286	0.741478	0.8779	0.7604	0.5488	1	0.8943	0.7719	0.9068	0.9292	0.8088	0.7529	0.679	0.6677	0.9384	0.8779	0.7383	1	0.8049	0.8639	0.8088	0.7421
IARS_86837_AD	0.4303	0.4515	0.3918	0.5186	0.4055	0.7213	0.5309	0.269	0.4748	0.441556	0.3284	0.4287	0.5529	0.5275	0.4055	0.5462	0.6718	0.5612	0.441556	0.4518	0.5285	0.6208	0.4342	0.4432	0.5965	0.3738	1	0.2647	0.441556	0.2989	0.4055	0.3573	0.3828	0.4432	0.7642	0.5148	0.3027	0.3591	0.6251	0.4055	0.601	0.4413	0.3988	0.4626	0.441556	0.4635	0.4926	0.5223	0.5862
ECM2_86879_AA	0.7168	0.557	0.634256	0.4615	0.634256	0.634256	0.6316	0.634256	0.4706	0.634256	0.5039	0.8814	0.5505	0.6	0.5714	0.7154	0.3974	0.932	0.634256	0.5586	0.7342	0.6592	0.8814	0.6038	0.4494	0.634256	0.634256	0.5185	0.634256	0.4615	0.8627	0.6957	0.8205	0.6769	0.634256	0.6316	0.467	0.6602	0.4551	0.8511	1	0.5882	0.4878	0.8205	0.6111	0.595	0.6769	0.634256	0.634256
C9orf89_86900_AA	0.6094	0.559904	0.4919	0.6773	0.5105	0.3401	0.4357	0.7395	0.559904	0.559904	0.5538	0.4712	0.5587	0.6835	0.5305	0.559904	0.559904	0.7295	0.5706	0.593	0.6873	0.651	0.512	0.6333	0.8537	0.579	0.5882	0.6695	0.4271	0.7442	0.6432	0.4487	0.4572	0.7479	0.6364	0.5617	0.7971	0.5974	0.5934	0.6973	0.5792	0.7847	0.7291	0.4297	0.5787	0.6267	0.7287	0.6952	0.5745
C9orf89_86901_AD	0.5549	0.498234	0.5009	0.6462	0.5204	0.3987	0.4534	0.6622	0.498234	0.498234	0.4773	0.3885	0.42	0.6837	0.5001	0.498234	0.498234	0.6443	0.2892	0.6167	0.5886	0.5719	0.2975	0.5836	0.7205	0.3882	0.4333	0.5859	0.298	0.7323	0.6318	0.4346	0.4302	0.702	0.5208	0.5163	0.7636	0.5482	0.4523	0.6785	0.4718	0.7578	0.6867	0.4373	0.4975	0.6099	0.7315	0.742	0.3703
ANKS6_87046_AD	0.092	0	0.2885	0.3302	0.3044	0.6863	0.3506	0.392	0.1324	0	0.4828	0.2445	0.3686	0.4008	0.3878	0.4197	0.325897	0.2964	0.2441	0.1659	0.6538	0.2513	0.2147	0.4336	0.495	0.3488	0.3543	0.3459	0.39	0.4307	0.2676	0.4936	0.317	0.3574	0.179	0.4495	0.3676	0.2756	0.4726	0.2191	0.1135	0.3592	0.2385	0.113	0.1649	0.3004	0.3835	0	0.3901
ZNF189_87091_AA	0.2888	0.311	0.1061	0.3129	0.2973	0.300406	0.2025	0.2182	0.4037	0.1841	0.0911	0.5946	0.4362	0.3757	0.2126	0.228	0.3367	0.2446	0.300406	0.348	0.4916	0.2005	0.4037	0.1621	0.2025	0.1096	0.300406	0.5517	0.300406	0.1841	0.4362	0.2274	0.1975	0.1841	0.300406	0.1915	0.3191	0.1996	0.2789	0.0943	0.2285	0.2416	0.3846	0.1388	0.300406	0.2789	0.1512	0.4037	0.3525
ZNF462_87144_AA	0.276941	0.3348	0.4051	0.1201	0	0.276941	0.2344	0.3178	0.1351	0.276941	0.2895	0.276941	0.388	0.2863	0.2616	0.1608	0.2279	0.4469	0.276941	0.324	0	0.3207	0.2329	0.3652	0.4481	0.3125	0.0865	0.3343	0.565	0.276941	0.7732	0.276941	0.3419	0.1395	0	0.4852	0.2469	0.3568	0.2183	0.1519	0.3094	0.1658	0.0771	0	0.276941	0.3397	0.2581	0.2163	0
ZNF462_87145_AA	0.3964	0.3444	0.1505	0.2213	0.33	0.5226	0.1754	0	0.2458	0.3649	0.3461	0.4668	0.1415	0.2382	0.1098	0.2101	0.1327	0.2761	0.212407	0	0.5226	0.2823	0.2407	0.2312	0.212407	0	0.0875	0.2385	0.212407	0.212407	0.212407	0.6968	0.212407	0.1412	0.5162	0.3948	0.203	0	0.2262	0.358	0.1893	0.2931	0.3026	0.4081	0.212407	0.2112	0.108	0.3018	0.3265
PRPF4_87262_AA	0.3424	0.2602	0.3053	0.2438	0.1078	0.1535	0.1841	0.2249	0.2438	0.204199	0.1577	0.0692	0.1947	0.1214	0.1677	0.0646	0.204199	0.1947	0.204199	0.4129	0.293	0.4916	0.5371	0.2214	0.3453	0.204199	0.204199	0.1078	0.204199	0	0.2165	0.3495	0.1495	0.204199	0.0882	0.2602	0.2165	0.2438	0.3006	0.204199	0.3006	0.2165	0.204199	0.2789	0.204199	0.204199	0.1947	0.2308	0.2087
RPL35_87538_AD	0.3177	0.465	0.5999	0.5161	0.7819	0.5659	0.3632	0.6553	0.606459	0.2136	0.5892	0.449	0.7228	0.5444	0.6617	0.4944	0.606459	0.7012	0.7002	0.7458	0.7097	0.4249	0.4176	0.4231	0.6255	0.352	0.4289	0.6848	0.6442	0.7142	0.6875	0.6197	0.6487	0.5807	0.5984	1	0.9112	0.6953	0.3284	0.737	0.5892	0.6442	0.6487	0.6487	0.7516	1	0.6901	0.7739	0.352
TOR2A_87657_AD	1	1	0.8921	0.5681	1	1	0.5262	0.8831	0.8092	1	0.8913	0.8665	1	0.9096	1	0.8572	1	0.8996	0.5114	0.7461	0.6491	0.7719	0.7651	0.6416	0.9303	0.8452	1	1	0.6874	0.8524	1	0.8424	0.583	0.6431	0.8103	0.8814	0.904	0.8637	0.8566	0.8567	1	0.8039	1	0.8134	1	0.8552	0.9077	1	1
FAM73B_87818_AD	0.2215	0.2137	0.5238	0.3187	0.3104	0.21	0.3184	0.2653	0.1973	0.1583	0.2792	0.496	0.3993	0.3343	0.3546	0.4225	0.2964	0.4015	0.4069	0.5147	0.2533	0.3638	0.1034	0.3068	0.5439	0.2653	0.2487	0.5762	0.2086	0.5462	0.4495	0.4428	0.3568	0.4099	0.5812	0.5505	0.5806	0.2514	0.391	0.5257	0.4257	0.5326	0.5305	0.5036	0.7857	0.6043	0.4992	0.3668	0.2332
POMT1_87937_AD	0.087	0.0996	0.2953	0.1275	0.2364	0.186	0.2182	0.2432	0.1053	0.1026	0.125	0.2105	0.3207	0.3982	0.309	0.208	0.16	0.1892	0.65	0.3269	0.2699	0.2139	0.1419	0.1149	0.1933	0.2687	0.255996	0.394	0.0723	0.3636	0.402	0.3913	0.3931	0.3467	0.2708	0.3323	0.3346	0.2353	0.3207	0.4211	0.1192	0.3378	0.4	0.2724	0.7083	0.3163	0.451	0.1985	0.2804
ADAMTS13_88052_AD	0.5789	1	0.5789	0.8672	0.7908	1	0.7333	1	0.534	0.8171	0.716	1	1	1	0.8049	1	0.8171	0.8245	1	0.8462	0.7064	1	0.828	0.5983	0.6962	0.8462	0.8783	0.8851	1	1	0.8539	0.9337	0.6471	0.8112	1	0.8877	1	0.8919	1	1	0.7908	1	0.8539	0.8757	1	0.8832	0.8783	1	1
BRD3_88091_AA	0.0567	0.0238	0.0486	0.0424	0.0126	0.0132	0.0411	0.0174	0.0263	0.022	0.0315	0.05	0.062	0.0729	0.0778	0.0191	0.0551	0.0678	0.2366	0.0296	0.0488	0.0133	0.1456	0.0301	0.0431	0.0827	0.0763	0.0187	0.1263	0.0283	0.0692	0.0364	0.0373	0.0649	0.0827	0.0835	0.0163	0.0472	0.0894	0.0827	0.0102	0.0522	0.0926	0.0438	0.3085	0.0652	0.0879	0.0114	0.0093
ABCA2_88255_AA	0.1555	0.3168	0.4087	0.3497	0.616	0.4748	0.2223	0.4876	0.1982	0.2113	0.3648	0.8221	0.7555	0.3179	0.6357	0.4388	0.3529	0.4282	0.444682	0.3593	0.3698	0.1268	0.3873	0.4906	0.2939	0.444682	0.4129	0.365	0.444682	0.743	0.8621	0.478	0.5073	0.6011	0.7786	0.4676	0.6237	0.5403	0.2898	0.5011	0.6973	0.4307	0.3976	0.7037	1	0.7432	0.5547	0.2538	0.3049
EXD3_88301_AD	0.0905	0.3411	0.4433	0.4695	0.3914	0.218	0.299	0.3892	0.3739	0.1928	0.3739	0.5071	0.1968	0.4837	0.1752	0.3432	0.8269	0.2545	0.6418	0.5752	0.5935	0.4837	0.2098	0.3128	0.5301	0.5059	0.5194	0.6918	0.2614	0.4433	0.9103	0.4632	0.2848	0.6057	0.5641	0.6565	0.6089	0.515	0.2416	0.6719	0.364	0.6418	0.7134	0.6196	0.7402	0.6196	0.608	0.4133	0.4145
TMSB4X_88498_AD	0.177007	0.2678	0.5198	0.1708	0	0	0.4573	0	0.6698	0	0.177007	0.1137	0.2836	0.177007	0.177007	0.1597	0.177007	0.4601	0.0962	0	0.122	0.2218	0.177007	0	0.0878	0.177007	0.0555	0.4255	0.1005	0.4821	0.4455	0	0.3477	0.1455	0.2904	0.2895	0.2912	0.2148	0.3787	0.2205	0	0.2845	0.1282	0.2592	0	0.1314	0.1348	0.072	0
GPM6B_88529_AA	0.8472	0.6572	1	0.7543	0.8508	1	0.6972	0.8155	0.7686	0.7173	0.7614	1	1	0.8743	0.9197	1	0.7409	0.7795	1	0.9298	0.8409	0.901	0.5175	0.8559	0.6872	0.8564	1	0.9197	0.8472	0.8478	0.8523	0.8842	0.8128	1	1	0.8403	1	0.6842	0.8852	1	1	0.8182	0.8182	0.9045	0.9597	0.9337	0.8674	0.5964	0.6624
ASB9_88545_AD	0.7026	0.6545	1	0.7026	0.5892	0.7026	0.7623	1	0.7099	0.7725	0.7699	0.719	0.8052	0.7933	0.7646	0.9094	1	0.6949	0.8052	0.5586	0.721	0.5586	0.5586	0.7151	0.9182	0.774	0.719	0.705082	0.6801	0.6632	0.6575	0.627	0.8848	1	0.6392	0.7995	0.7026	0.7799	0.674	0.6949	0.7266	0.5863	0.7246	0.6158	0.706	0.6801	0.5153	0.6918	0.5415
PIGA_88555_AD	0.7825	0.879	1	0.8453	0.6427	0.8621	0.8806	0.8685	0.7797	0.5533	0.6959	0.9063	0.6464	0.8321	0.9591	0.794	1	0.9462	0.861019	0.8753	0.9189	1	0.7218	0.8753	0.7468	0.7956	1	1	0.861019	1	0.878	0.8643	0.7576	0.8892	0.7797	0.7188	0.8195	0.71	0.9374	0.5926	0.8598	0.616	0.936	0.7995	1	0.8329	0.9063	0.9077	0.8636
AP1S2_88572_AA	0.2359	0.488	0.5865	0.5327	0.604	0.7076	0.5586	0.5591	0.6484	0.4758	0.654	0.6245	0.6316	0.8161	0.6266	0.499	0.5903	0.7385	0.4797	0.7904	0.4696	0.7998	0.1543	0.5775	0.7486	0.5735	0.2407	0.7923	0.2622	0.6162	0.5296	0.5601	0.7365	0.8074	0.525	0.9061	0.6451	0.5045	0.4182	0.864	0.5014	0.6301	0.5735	0.7669	1	0.5323	0.7424	0.6361	0.4945
CXorf23_88652_AD	0.8469	0.2939	0.463	0.322	0.3728	0.4797	0.2643	0.2694	0.3953	0.357871	0	0.3204	0.6204	0.3204	0.4514	0.3725	0.43	0.5214	0.357871	0.4514	0.2985	0.3791	0.357871	0.5947	0.6535	0.456	0.357871	0.3697	0.819	0.357871	0.3953	0.557	0.2953	0.2131	0.5348	0.463	0.3491	0.2102	0.3328	0.3807	0.1656	0.5332	0.472	0.273	0.3916	0.3482	0.5679	0.3891	0.363
SAT1_88699_AD	0.7662	0.8829	0.3938	0.6992	0.8007	0.6647	0.8974	0.7451	0.9045	1	0.9214	0.6159	0.7848	0.7465	0.8744	0.7321	0.6575	0.8362	0.720093	0.691	0.8186	0.6904	0.8936	0.829	0.8827	0.7256	0.3603	0.9263	0.4458	0.8578	0.8062	0.9223	0.6457	0.4782	0.884	0.9159	0.8858	0.9572	0.5763	0.8217	0.5527	0.8659	0.7591	0.6357	0.6542	0.8629	0.6794	0.9516	0.8076
TAB3_88756_AD	0.1144	0.4554	0.4268	0.4485	0.0924	0.2613	0.1093	0.713	0.6082	0.361661	0.211	1	0.1863	1	0.1739	0.2404	1	0.3275	0.361661	0.445	0.3774	1	0.361661	0.4044	0.361661	0.361661	0.1633	1	0.361661	0.1541	1	0.214	0.361661	0.0452	1	0.7275	0.3937	0.3267	0.1474	0.1185	0.3684	0.129	0.2925	0.2443	0.361661	0.5937	1	0.0917	0.1431
TAB3_88762_AA	0	0	0.0974	0.0661	0.1075	0.0321	0.0516	0	0	0.3235	0.0542	0	0.0622433	0.0622433	0.1227	0	0	0	0.1653	0	0.0622433	0	0.063	0	0.0516	0.0622433	0.0622433	0.0622433	0.0622433	0.0622433	0.0622433	0	0.1103	0.1928	0.0622433	0	0.2369	0	0.037	0.0622433	0	0.2952	0.1452	0.125	0.0622433	0	0	0.062	0
CXorf38_88838_AA	1	1	1	1	1	1	1	1	1	0.938	1	0.6209	0.4807	1	1	1	1	0.8128	0.938	0.6882	0.4077	1	0.938	1	1	0.938	0.938	1	1	1	1	0.6699	1	1	1	1	1	1	1	0.7448	1	0.8567	1	1	1	1	1	1	0.7248
KRBOX4_88894_AD	0.2828	0.4607	0.4862	0.549	0.6811	0.3179	0.5034	0.3929	0.4607	0.494264	0.4799	0.5402	0.2783	0.5788	0.6188	0.5961	0.7455	0.5782	0.5617	0.4128	0.0897	0.3629	0.4723	0.4873	0.2635	0.3603	0.6777	0.4338	0.5737	0.6916	0.2706	0.4485	0.3742	0.4799	0.4961	0.4599	0.4376	0.5813	0.5281	0.6261	0.4159	0.5474	0.5465	0.4456	0.4559	0.2938	0.4159	0.4807	0.6308
PORCN_88990_AA	0.5128	0.2734	0.1512	0.1643	0.3223	0.4972	0.2785	0.3909	0.2861	0.2785	0.2942	0.27	0.4993	0.3254	0.3576	0.2918	0.4267	0.4328	0.3028	0.4571	0.3496	0.4302	0.3111	0.4338	0.3548	0.7333	0.2021	0.2536	0.4267	0.3667	0.5149	0.2901	0.3272	0.4031	0.3052	0.3752	0.3512	0.3781	0.4477	0.6984	0.7134	0.7226	0.3081	0.2359	0.3667	0.3738	0.4294	0.4128	0.2897
TIMM17B_89016_AA	0.6367	0.5563	0.7852	0.8769	0.7816	0.7386	0.7124	0.8429	0.4811	1	0.6603	0.8393	0.7276	0.723	0.779	0.6952	1	0.6663	0.5317	0.8209	1	0.7918	0.4779	0.8915	0.8421	0.7541	0.8225	0.8665	0.7525	0.789	0.7366	0.7732	0.8123	0.8299	0.8519	0.8297	0.8907	1	0.9344	0.9393	1	0.7605	0.9491	0.8657	0.7714	1	0.9453	0.7396	1
TIMM17B_89018_AA	0.2582	0.5121	0.3864	0.4176	0.5182	0.1863	0.3505	0.4939	0.2721	0.5862	0.3208	0.4167	0.5373	0.3774	0.3977	0.2904	0.4501	0.4477	0.2225	0.3909	0.5313	0.4468	0.2994	0.5105	0.2181	0.2572	0.2271	0.3067	0.2886	0.4147	0.42	0.4047	0.4959	0.3827	0.3973	0.4176	0.722	0.3821	0.5057	0.6115	0.6585	0.5496	0.4768	0.5739	0.5929	0.5794	0.6696	0.4349	0.2646
PQBP1_89028_AD	0.247	0.2583	0.1437	0.2302	0.2323	0.0973	0.2065	0.215	0.25	0.2314	0.2794	0.2386	0.2342	0.28	0.2115	0.1997	0.1381	0.197	0.6522	0.1882	0.1908	0.1772	0.9431	0.1862	0.1809	0.2448	0.9965	0.1431	0.1848	0.2181	0.2034	0.2169	0.1667	0.2623	0.2395	0.2238	0.1465	0.2402	0.2308	0.2247	0.1741	0.2533	0.2394	0.1905	0.2011	0.1983	0.2313	0.2216	0.2667
PQBP1_89029_AD	0.7687	0.6665	0.581	0.818	0.6006	0.5074	0.6207	0.702	0.7248	0.6839	0.6322	0.6053	0.6737	0.746	0.626	0.6382	0.4803	0.668	0.9184	0.5941	0.5954	0.71	0.9922	0.7601	0.6068	0.7373	1	0.5271	0.6149	0.5516	0.6236	0.6754	0.5782	0.726	0.7016	0.7631	0.7888	0.7147	0.5962	0.7291	0.6517	0.7532	0.69	0.5551	0.5978	0.7106	0.7663	0.661	0.7019
MAGIX_89090_AD	0.8041	0.7426	0.4393	0.5178	0.6105	0.8631	0.6703	0.5879	0.8458	0.6847	0.7625	0.4005	0.6916	0.7214	0.5888	0.6323	0.6928	0.5958	0.2296	0.8311	0.6925	0.9465	0.7632	0.7075	0.8882	0.1761	0.5517	0.8066	0.5427	0.4858	0.4081	0.6051	0.6177	0.3251	0.4518	0.6489	0.694	0.8582	0.5202	0.6377	0.5726	0.7547	0.8197	0.5203	0.7482	0.7669	0.9108	0.6135	0.5759
FAM156B_89178_AD	0.2539	0.4361	0.628	0.5455	0.2978	0.7332	0.4391	0.2713	0.2328	0.2804	0.3417	0.6624	0.5142	0	0.4287	0.6249	0.32	0.3688	0.520969	0.4465	0.7208	0.6755	0.3929	0.318	0.1516	0.445	0.520969	0.6005	0.6063	0.520969	0.4936	0.4666	0.2138	0.4222	0.5366	0.7513	0.7638	0.6873	0.5961	0.7558	0.8352	0.566	0.3797	0.5038	0.8397	0.7717	0.8469	0.7197	0.4351
TRO_89255_AD	0.6933	0.7411	0.4794	0.4502	0.7594	0.483	0.6834	0.632	0.8211	1	0.6764	0.4108	0.4817	0.5988	0.8896	0.51	1	0.6458	0.5815	0.5496	0.5373	0.5574	0.7601	0.6067	0.5249	0.5056	0.3501	0.6431	0.4735	0.7004	0.4751	0.5224	0.5928	1	0.7906	0.5724	0.5849	0.6828	0.646	0.4346	0.5248	0.5812	0.5789	0.7525	0.2626	0.7723	0.5781	0.6204	1
FAM104B_89279_AD	0.3742	0.4889	0.4177	0.4473	0.3894	0.6145	0.5274	0	0.4505	0.437147	0.6567	0.6326	0.6145	0	0.4728	0.5893	0.6906	0.2301	0.3534	0.4435	0.2767	0.1481	0.439	0.3742	0.4335	0.5515	0.6567	0.4123	0.4889	0.4435	0.5344	0.5274	0.4556	0.2581	0.6398	0.4239	0.6966	0.7416	0.4414	0.3646	0.4889	0.2146	0.285	0.437147	0.401	0.401	0.2418	0.437147	0.437147
FAM104B_89282_AD	0.4706	0.2205	0.597	0.345	0.1649	0.2623	0.2353	0.3077	0.2073	0.2832	0.2247	0.3636	0.3571	0.198	0.2577	0.4402	0.6087	0.3221	0.1509	0.2205	0.25	0.2817	0.3505	0.3265	0.2047	0.2286	0.2623	0.2129	0.2148	0.7568	0.4522	0.2733	0.4324	0.3478	0.5714	0.2222	0.3077	0.2148	0.3613	0.4375	0.3077	0.2921	0.2588	0.4564	0.2059	0.4	0.3415	0.4706	0.1818
SPIN2B_89296_AD	0.8413	0.6355	1	0.5729	0.5776	0.8602	0.6579	0.8354	0.8	0.5063	0.7236	0.675	0.6128	0.6266	0.7633	0.7471	0.7194	0.8346	0.774615	0.7417	0.8807	0.8336	0.7607	0.9534	0.9619	0.747	0.5534	0.661	0.7575	0.7417	0.806	0.7451	0.7234	0.8926	0.8769	0.8506	0.6977	0.5909	0.7829	0.908	0.8017	0.799	0.7547	0.6569	0.8272	0.8477	0.6255	0.7456	0.7811
ABCB7_89517_AA	0.5919	0.4916	0.5068	0.6057	0.5865	0.5371	0.4653	0.2789	0.518	0.5752	0.4622	0.2165	0.7437	0.4622	0.4916	0.4001	0.6286	0.3745	0.451807	0.7074	0.4916	0.401	0.7437	0.4085	0.6286	0.1214	0.1947	0.5078	0.451807	0.451807	0.4293	0.5134	0.3559	0.392	0.5301	0.392	0.3453	0.5752	0.3259	0.451807	0.5154	0.4532	0.3259	0.4678	0.451807	0.5542	0.4266	0.5578	0.6226
ZNF711_89559_AA	0.708624	0.2886	0.7609	1	1	1	1	1	0.4415	0.708624	0.5425	1	1	1	0.2784	0.4663	1	0.7034	0.708624	0.8729	0.708624	0.896	0.708624	0.2544	0.708624	0.708624	0.708624	1	0.708624	0.708624	1	0.5148	0.708624	0.8365	0.708624	0.7946	0.9095	0.708624	0.4663	0.8544	0.5894	1	0.807	0.8237	1	1	1	0.4779	1
PABPC5_89576_AA	1	0.8207	0.8858	1	0.5718	1	1	1	1	0.2924	0.6319	0.5831	1	0.7228	0.9192	1	0.69	1	0.900344	1	1	0.6348	0.6231	1	0.6041	1	0.900344	1	0.900344	0.900344	1	1	1	1	1	0.741	1	1	1	1	1	1	1	1	1	1	1	0.7744	1
TRMT2B_89626_AD	0.748	0.6595	0.5022	0.705	0.6743	0.5897	0.4469	0.3731	0.5998	0.636999	0.5162	0.7162	0.3179	0.5736	0.9082	0.8004	0.8247	0.5968	0.636999	0.8378	0.3988	0.4997	0.6612	0.608	0.9212	0.636999	1	0.3356	0.636999	0.636999	1	0.5747	0.636999	0.6314	0.3971	0.5821	0.8813	0.6652	0.6223	1	0.8682	0.7738	0.8101	0.4927	1	0.5287	0.7192	0.597	0.7691
ARMCX3_89663_AA	0.2011	0.3515	0.2529	0.4647	0.5255	0.3359	0.37	0.5477	0.3093	0.3607	0.1835	0.5247	0.4006	0.397	0.3351	0.4916	0.4593	0.282	0.423653	0.4335	0.4352	0.538	0.2638	0.4108	0.383	0.4765	0.3967	0.3001	0.3626	0.3068	0.4989	0.3557	0.4807	0.4757	0.4279	0.3195	0.502	0.4856	0.4921	0.3474	0.441	0.5226	0.4822	0.6055	0.7668	0.5507	0.4872	0.4674	0.5684
ARMCX5_89701_AA	0.2118	0.4842	0.5487	0.5571	0.4608	0.3075	0.4905	0.5629	0.5642	0.459427	0.3656	0.5605	0.4299	0.4112	0.4327	0.3157	0.451	0.6779	0.459427	0.439	0.3195	0.2749	0.7314	0.4133	0.365	0.2104	0.459427	0.4506	0.459427	0.3418	0.4186	0.5804	0.2345	0.459427	0.6234	0.4075	0.415	0.2964	0.5568	0.7232	0.3999	0.4179	0.3761	0.5079	0.459427	0.4889	0.3691	0.4815	0.4334
BEX2_89725_AD	0.1415	0.2368	0.2613	0.3021	0.2952	0.619	0.3098	0.3815	0.236	0.1693	0.2321	0.2019	0.3036	0.2996	0.4073	0.4812	0.285	0.351	0.3298	0.291	0.284	0.2876	0.1776	0.5165	0.5406	0.2682	0.6439	0.5458	0.3713	1	0.334	0.3396	0.3453	0.4701	0.461	0.525	0.6168	0.3492	0.2475	0.3481	0.5082	0.4024	0.2958	0.3415	0.7022	0.4758	0.4533	0.6362	0.3717
MORF4L2_89770_AA	0.339	0.0231	0.1479	0.037	0.053	0.1914	0.1034	0.0743	0.0654	0.058	0.1298	0.2011	0.3092	0.1495	0.1558	0.1994	0.1203	0.1437	0.158068	0.2353	0.1096	0.1914	0.0223	0.2353	0.2627	0.0285	0.141	0.2178	0.1437	0.158068	0.1333	0.0651	0.1096	0.2169	0.228	0.1244	0.2011	0.1772	0.0627	0.381	0.0774	0.1376	0.1621	0.098	0.5676	0.2087	0.1742	0.0886	0.0469
TMSB15B_89790_AD	0.5385	0.353	0.3296	0.4966	0.2951	0.479	0.6342	0.3508	1	0.4702	0.2505	0.2829	0.5179	0.5026	0.8117	0.6573	0.2927	0.2261	0.2162	0.3762	0.3318	0.2337	0.7752	0.4021	0.2865	0.2626	0.3086	0.379	0.5571	1	0.7804	0.2915	0.5459	0.3158	0.2212	0.5749	0.302	0.7547	0.1868	0.306	0.3	0.3358	0.326	0.5246	0.3401	0.4834	0.4558	0.4919	0.2618
LONRF3_89947_AA	0.201451	0.1094	0.5429	0.1247	0.1062	0.201451	0.1691	0.1247	0.1919	0.201451	0.2627	0.3483	0.0665	0.2627	0.2268	0.1512	0.2289	0.3081	0.201451	0.2058	0.1367	0.506	0.201451	0.2218	0.201451	0.201451	0	0.2218	0.2109	0.201451	0.4161	0.2239	0.1179	0.201451	0.1761	0.322	0.5166	0.1412	0.0381	0.0924	0.2029	0.2627	0.5166	0.2627	0.201451	0.1394	0.3081	0.2091	0.0988
FMR1_90270_AA	0.2185	0.4619	0.4349	0.427	0.3056	0.4811	0.3884	0.6861	0.4576	0.45386	0.3479	0.3601	0.3458	0.3659	0.5176	0.4489	0.3785	0.3615	0.45386	0.4087	0.3192	0.5283	0.2796	0.3526	0.5966	0.4034	0.2546	0.3836	0.45386	0.3024	0.3764	0.6339	0.7273	0.4095	0.3502	0.3675	0.7725	0.4957	0.583	0.4139	0.6004	0.6138	0.413	0.4376	0.45386	0.4009	0.5609	0.2884	0.5613
CXorf40A_90314_AD	0.2472	0.2346	0.0476	0.2975	0.4881	0.4482	0.2058	0.1982	0.1148	0.5566	0.074	0.293	0.3361	0.3598	0.3091	0.3417	0.1909	0.1323	0.4531	0.302	0.3813	0.3172	0.168	0.242	0.3688	0.6068	0.1764	0.2775	0.111	0.5162	0.0719	0.352	0.4705	0.4062	0.332	0.3657	0.4295	0.2132	0.4348	0.3399	0.309195	0.3203	0.2178	0.3781	0.2528	0.309195	0.6439	0.0929	0.3667
TAZ_90598_AD	0.712308	0.712308	0.7835	0.461	0.5402	0.712308	0.6219	0.7716	0.712308	0.712308	0.9129	0.712308	0.6219	0.7669	0.712308	0.7366	0.712308	0.7247	0.5782	0.6934	0.712308	0.523	0.4513	0.4086	0.679	0.523	1	0.87	0.852	0.5782	0.7475	0.7801	0.8044	0.8847	0.7933	0.7226	0.8223	0.8629	0.48	0.6637	0.7475	0.7133	0.8586	0.4997	0.8791	0.8326	0.765	0.6492	0.712308
TAZ_90600_AD	0.2151	0.2783	0.5771	0.1959	0.3277	0.101	0.2577	0.4214	0.2322	0.2568	0.6057	0	0.1983	0.4757	0.2868	0.2969	0.2841	0.3313	0.123	0.278	0.0954	0.3428	0.2377	0.137	0.3274	0.1374	0.4205	0.5782	0.2196	0.1394	0.3747	0.3419	0.3826	0.3172	0.3589	0.4447	0.3326	0.3852	0.1855	0.5622	0.2622	0.6273	0.5526	0.2458	0.5446	0.6031	0.351	0.2276	0.2873
FAM3A_90634_AA	0.6023	0.7688	0.6159	0.5499	0.6661	0.3631	0.4872	0.725	0.6069	1	0.4949	0.7518	0.4711	0.506	0.7303	0.426	0.604318	0.4014	0.2936	0.6813	0.6929	0.7138	0.5619	0.6286	0.8166	0.4711	0.7623	0.5994	0.4928	0.6984	0.6621	0.7195	0.5166	0.6159	0.6405	0.6405	0.6984	0.7277	0.3178	0.5599	0.6592	0.7138	0.7808	0.6286	0.7354	0.3772	0.7917	0.4504	0.5282
C1orf50_90933_AD	0.4135	0.5156	0.450251	0.622	0.450251	0.5365	0.5093	0.6802	0.2547	0.3175	0.450251	0.2667	0.4384	0.4903	0.4265	0.3513	0.450251	0.3737	0.1124	0.2464	0.450251	0.5903	0.6106	0.388	0.4751	0.2421	0.3581	0.5227	0.4618	0.5457	0.1096	0.4435	0.450251	0.2204	0.6026	0.5432	0.5463	0.5551	0.3977	0.5816	0.6776	0.8148	0.4675	0.4392	0.361	0.7528	0.450251	0.4151	0.362
PPP6R3_92707_AA	0	0.3779	0.3218	0.3705	0.4164	0.2026	0.675	0.2533	0.2732	0.3874	0.4643	0.405244	0.2022	0.536	0.2569	0.3527	0.405244	0.3518	0.405244	0.3706	0.3909	0.2883	0.5274	0.44	0.4773	0.2799	0.405244	0.6223	0.405244	0.405244	0.2692	0.4723	0.1183	0.4237	0.405244	0.411	0.5324	0.3465	0.1098	0.405244	0.0928	0.4916	0.3909	0.2074	0.405244	0.3309	0.5336	0.296	0.4281
NACA_93184_AA	0.1528	0.2913	0.4637	0.2374	0.1291	0.0827	0.0607	0.2732	0.1264	0.0166	0.3927	0.0511	0.1039	0.3316	0.6278	0.24	0.196399	0.4211	0.196399	0.19	0.0567	0.094	0.196399	0.184	0.054	0.019	0.0043	0.1739	0.196399	0.2748	0.3512	0.3454	0.1104	0.3258	0.0764	0.3512	0.4689	0.1419	0.0432	0.2686	0.3229	0.3193	0.4192	0.0782	0.1242	0.5804	0.7051	0.3512	0.1739
SLC15A4_93374_AA	0.262613	0.0638	0.2707	0.3342	0.2968	0.4706	0.2124	0.4696	0.5324	0.3663	0.1681	0.3147	0.3591	0.4367	0.5736	0.254	0.262613	0.3047	0.262613	0.3108	0.1081	0.5388	0.262613	0.1149	0.1263	0.1081	0.262613	0.12	0.017	0.262613	0.467	0.3987	0.0716	0.2396	0.3383	0.2686	0.4579	0.1801	0.263	0.5407	0.3496	0.3688	0.442	0.2406	0.3077	0.4715	0.4749	0.219	0.2565
NPIPB5_94075_AD	0.4895	0.7951	0.5385	0.6586	0.8332	0.5202	0.5766	0.6395	0.8055	0.6202	0.7278	0.5197	0.6056	0.4054	0.6443	0.5329	0.6599	0.5303	0.618934	0.6155	0.5483	0.3841	0.618934	0.618934	0.6613	0.6097	0.618934	0.5481	0.618934	0.3742	0.8249	0.7432	0.5303	0.7537	0.8412	0.6094	0.6073	0.7155	0.6733	0.669	0.5185	0.5612	0.5845	0.5952	0.4424	0.7248	0.5774	0.5945	0.5154
SULT1A4_94118_AD	0.846499	1	0.846499	0.8727	0.846499	0.7219	0.9693	0.978	0.9602	0.846499	0.846499	0.846499	0.9736	0.9033	0.846499	0.7889	0.7219	0.8646	0.846499	0.8538	0.846499	0.645	0.9868	0.9888	0.845	0.9894	0.6817	0.8809	0.8955	0.7003	0.846499	0.8688	0.9761	0.866	0.8385	0.7957	0.609	0.8751	0.978	0.7957	0.7003	0.9316	0.846499	0.8277	0.9131	0.7316	0.7957	0.9171	0.9492
ZSWIM7_94443_AA	0.2204	0.543465	0.5738	0.6436	0.204	0.3495	0.5179	0.3583	0.6161	0.5727	0.4953	0.8125	0.763	0.7732	0.6079	0.4156	0.5468	0.735	0.7563	0.3478	0.5429	0.5546	0.543465	0.6415	0.4895	0.8307	0.3572	0.8858	0.7404	0.5743	0.3642	0.3523	0.5034	0.4942	0.3369	0.545	0.5696	0.4908	0.7714	0.7653	0.8488	0.8084	0.5084	0.3132	0.543465	0.6859	0.5608	0.2397	0.4605
ZSWIM7_94446_AD	0.6466	0.785131	0.7696	0.9043	0.5618	0.4464	0.7036	0.7875	0.8427	0.9012	0.8188	0.8755	0.9016	0.9297	0.8653	0.7363	0.5877	0.8879	0.9103	0.6999	0.8501	0.8305	0.785131	0.9218	0.8239	0.785131	0.8456	0.9263	0.8635	0.7293	0.7154	0.5685	0.8391	0.8172	0.7164	0.6803	0.7244	0.703	0.8662	0.9311	0.9037	0.8361	0.8009	0.6042	0.785131	0.7888	0.7853	0.4116	0.7681
RPL23_94524_AA	0.2875	0.51459	0.0975	0.4834	0.5646	0.51459	0.51459	0.7169	0.2335	0.51459	0.51459	0.51459	0.51459	0.3841	0.4478	0.7809	0.51459	0.28	0.547	0.1808	0.1441	0.3132	0.6218	0.4428	0.3048	0.0348	0.5034	0.7516	0.6049	0.522	0.5423	0.563	0.51459	0.6125	0.6797	0.5043	0.6579	0.5785	0.6394	0.6672	0.5848	0.696	0.8595	0.6498	0.7012	0.51459	0.51459	0.2014	0.5263
ZNF433_94993_AA	0.2538	0.373359	0.5595	0.292	0.4374	0.373359	0.3618	0.2322	0.3525	0.373359	0.1536	0.4464	0.2058	0.4757	0.2538	0.5314	0.373359	0.4974	0.373359	0.5142	0.3121	0.5877	0.3121	0.373359	0.373359	0.3769	0.373359	0.331	0.426	0.373359	0.5595	0.3769	0.28	0.373359	0.3525	0.3884	0.0916	0.373359	0.2322	0.3525	0	0.5314	0.3121	0.5142	0.4205	0.3414	0.5258	0.3525	0.373359
CNTD2_95211_AA	0.2605	0.3894	0.285	1	0.5725	0.449454	0.4889	0.3984	0.2418	0.4435	0.4078	0.2099	0.4177	0.6034	0.4689	0.3714	0.449454	0.3622	0.449454	0.642	0.449454	0.6906	0.3203	0.3096	0.4435	0.5274	0.4556	0.3235	0.408	0.449454	0.6629	0.4335	0.293	0.7152	0.4448	0.3684	0.6175	0.4889	0.4177	0.539	0.4358	0.5893	0.3235	0.3784	0.4141	0.449454	0.5605	0.5127	0.5274
SIX5_95264_AA	0.2863	0.4446	0.4959	0.2805	0.430275	0.537	0.7697	0.5401	0.4954	0.430275	0.2911	0.2413	0.4223	0.4765	0.6669	0.2926	0.430275	0.5975	0.1974	0.6674	0.3165	0.6545	0.271	0.3118	0.5279	0.4372	0.5587	0.5874	0.6317	0.2697	0.5365	0.4603	0.559	0.4088	0.4053	0.678	0.357	0.3365	0.5376	0.5247	0.3503	0.6404	0.5339	0.4838	0.4406	0.5001	0.7154	0.1478	0.3038
NIF3L1_95743_AA	0.3615	0.713439	0.5807	0.7301	0.5436	0.6628	0.6466	0.6557	0.7303	0.7023	0.8812	0.5887	0.5777	0.6995	0.57	0.6634	0.8749	0.824	0.713439	0.664	0.8471	0.6572	0.8021	0.7862	0.8139	0.6626	0.532	0.9014	0.6711	0.7965	0.7104	0.5942	0.6729	0.7647	0.715	0.8286	0.7068	0.7328	0.6129	0.8193	0.713439	0.7388	0.7106	0.77	0.713439	0.559	0.8028	0.88	0.8355
NIF3L1_95744_AD	0.3933	0.490143	0.4771	0.4698	0.4149	0.4567	0.5085	0.6316	0.4544	0.2171	0.7639	0.2689	0.362	0.490143	0	0.4307	0.5854	0.4325	0.490143	0.4369	0.6299	0.5683	0.5476	0.5888	0.8159	0.6893	0.3062	0.7751	0.490143	0.6861	0.6149	0.3676	0.490143	0.59	0.2817	0.6997	0.5595	0.2237	0.3707	0.6185	0.490143	0.3181	0.2938	0.5082	0.490143	0.4976	0.6099	0.7258	0.4576
GMPPA_95766_AA	0.44269	0.5676	0.4182	0.4614	0.44269	0.3902	0.3673	0.254	0.3795	0.9159	0.5061	0.44269	0.5882	0.6176	0.5703	0.3311	0.6265	0.4511	0.44269	0.2715	0.6499	0.3286	0.4755	0.3617	0.3984	0.44269	0.6385	0.5853	0.3868	0.5286	0.386	0.4788	0.4097	0.2615	0.3111	0.3774	0.4282	0.44269	0.2965	0.44269	0.5686	0.7047	0.371	0.2042	0.44269	0.2971	0.5147	0.8495	0.48
D2HGDH_95815_AD	0	0.7435	0.38	0.5562	0.8707	0.6955	0.6907	0.5947	0.5399	0.2309	0.8319	0.7255	0.6814	0.4568	0.689	0.6443	0.7386	0.7545	0.602077	0.7394	0.602077	0.6734	0.2035	0.501	0.867	0.2505	0.3683	0.8316	0.4515	0.6832	0.5739	0.7257	0.6646	0.5577	0.602077	0.7583	0.7536	0.5259	0.4307	0.8331	0.5806	0.602077	0.8715	0.7417	0.8725	0.6019	0.602077	0.6925	0.6323
MATR3_96942_AD	0.333	0.4521	0.2461	0.2963	0.3053	0.2535	0.4037	0.4282	0.2889	0.331132	0.1703	0.4376	0.3915	0.3569	0.4322	0.2938	0.4591	0.3076	0.331132	0.352	0.3951	0.2779	0.4635	0.3315	0.0933	0.331132	0.331132	0.1692	0.331132	0.3456	0.1952	0.2611	0.5361	0.2837	0.2668	0.3513	0.2837	0.3977	0.2689	0.2326	0.3755	0.4612	0.2109	0.2694	0.331132	0.1776	0.179	0.3535	0.2624
ARHGEF9_98345_AD	0.2759	0.2388	0.3177	0.2963	0	0.0748	0.2025	0.129	0.1509	0.1818	0.1576	0.230937	0	0.1747	0.2105	0.3284	0.230937	0	0.230937	0.1231	0.230937	0.3306	0.4706	0.3415	0.4444	0.4706	0.230937	0.2286	0.1649	0.230937	0.4088	0.1176	0.1649	0.230937	0	0.3077	0.3884	0.2105	0.3077	0.1649	0.2623	0.2105	0.1873	0.2105	0.2286	0.3836	0.1951	0.2286	0.2148
MRPL43_100355_AD	0.4177	0.2687	0.42828	0.5707	0.45	0.2418	0.6327	0.42828	0.8721	0.0784	0.0878	0.4886	0.7712	0.42828	0.2938	0.42828	0.42828	0.0687	0.6538	0.5965	0.7597	0.6222	0.42828	0.7054	0.0674	0.5403	0.5732	0.74	0.5721	0.42828	0.42828	0.1164	0.42828	0.4249	0.1124	0.6861	0.1473	0.4817	0.4718	0.42828	0.42828	0.0909	0.0806	0.1197	0.6278	0.42828	0.42828	0.7031	0.42828
KIAA1456_107578_AD	0.2861	0.4538	0.6409	0.6213	0.5815	0.5033	0.5523	0.5682	0.4242	0.6798	0.4022	0.5149	0.6346	0.5914	0.4687	0.6048	0.5194	0.4502	0.492827	0.4995	0.492827	0.6142	0.4198	0.4144	0.3254	0.2245	0.492827	0.6125	0.492827	0.4648	0.4356	0.444	0.492827	0.492827	0.492827	0.6095	0.4764	0.492827	0.7643	0.3398	0.6309	0.5476	0.5103	0.5366	0.2963	0.4005	0.6494	0.6213	0.5453
SEC24C_114552_AA	0.4954	0.436	0.7571	0.8353	0.6834	0.29	0.655	0.6794	0.5559	0.5446	0.6514	0.59	0.7171	0.7965	0.681335	0.8765	0.681335	0.533	0.681335	0.8056	0.7194	0.7367	0.681335	0.7113	0.8871	0.6572	0.5462	0.681335	0.7592	0.6689	0.681335	0.7788	0.6532	0.681335	0.7487	0.7982	0.9075	0.6023	0.7752	0.9164	0.681335	0.6925	0.8996	0.8416	0.8785	0.9117	0.8759	0.4926	0.4091
SAT1_120574_AD	0.4675	0.6528	0.2234	0.3084	0.5342	0.4178	0.7225	0.5514	0.5588	0.6498	0.7623	0.462	0.4252	0.5354	0.6113	0.5844	0.469	0.6529	0.0673	0.527	0.6247	0.2851	0.5475	0.379	0.5378	0.4798	0.1712	0.7209	0.401	0.5335	0.4428	0.7666	0.5224	0.2281	0.6157	0.6859	0.599	0.7345	0.2889	0.505	0.5726	0.577	0.4926	0.4771	0.3683	0.6708	0.386	0.7271	0.6195
NPM2_136551_AD	0.694748	0.784	0.6137	0.605	0.6395	0.7984	0.7385	0.8107	0.8361	0.6688	0.6132	0.7131	0.658	0.6217	0.694748	0.6043	0.694748	0.7855	0.3828	0.5201	0.694748	0.694748	0.8449	0.675	0.6819	0.4717	0.6628	0.7315	0.826	0.6849	0.7194	0.6411	0.6057	0.4923	0.7788	0.7339	0.694748	0.5703	0.5908	0.6977	0.7265	0.7635	0.854	0.6545	0.694748	0.694748	0.694748	0.8423	0.612
COX4I1_156373_AA	0.5934	0.7302	0.4521	0.5434	0.5141	0.2553	0.5872	0.5766	0.665	0.5475	0.6135	0.5023	0.6942	0.6166	0.6494	0.4679	0.5744	0.772	0.4158	0.5232	0.5362	0.6044	0.3475	0.5019	0.5849	0.4699	0.3252	0.5396	0.3527	0.4086	0.4718	0.4969	0.4858	0.3518	0.5798	0.6187	0.5732	0.7536	0.6787	0.6429	0.5436	0.6494	0.6041	0.5051	0.491	0.7064	0.6517	0.4996	0.5955
HES4_6_RI	0.3003	0.3203	0.4237	0.2653	0.4276	0.331	0.3932	0.5599	0.3736	0.7158	0.5494	0.4256	0.3566	0.4691	0.5795	0.2062	0.2611	0.6181	0.8025	0.5931	0.621	0.4459	0.4297	0.5616	0.5329	0.4053	0.603	0.553	0.4747	0.7489	0.4921	0.327	0.3622	0.5412	0.6079	0.6598	0.6017	0.5187	0.4649	0.6302	0.6027	0.608	0.5595	0.5931	0.655	0.6985	0.4775	0.3863	0.5146
C1orf159_12_RI	0.602777	0.528	0.8818	0.6431	0.4562	0.7025	0.2298	0.4879	1	0.2846	0.8086	0.6988	0.4133	0.7939	0.6351	0.4986	1	0.6871	0.6351	0.5611	0.6988	0.7025	0.4986	0.5137	0.6813	0.3671	0.3321	0.766	0.4768	0.4272	0.3833	0.583	0.7408	0.745	0.4133	0.7528	0.7528	0.5186	0.8253	0.6583	0.7322	0.7408	0.6884	0.5479	0.6534	0.7637	0.727	0.528	0.6654
C1orf159_14_ES	0.491885	0.3295	0.2324	0.3386	0.6276	0.185	0.6858	0.4453	0.491885	0.813	0.3045	0.5534	0.513	0.4537	0.4433	0.3777	0	0.3544	0.3034	0.7031	0.3025	0.4598	0.2947	0.6853	0.3844	0.4983	0.3924	0.4433	0.4884	0.713	0.8212	0.6264	0.7965	0.4898	0.4608	0.5576	0.2928	0.4478	0.2565	0.5816	0.2368	0.4283	0.5858	0.4744	0.7459	0.3685	0.4405	0.4023	0.5699
C1orf159_16_RI	0.897256	0.897256	0.852	0.3304	1	1	0.6814	1	1	1	1	0.644	0.5577	1	1	1	0.897256	1	0.897256	1	0.6814	1	0.2475	1	1	0.6637	1	1	0.5968	0.6333	0.7576	0.583	0.897256	0.5877	0.8267	1	1	1	1	1	1	1	0.8242	0.8709	1	1	1	1	1
C1orf159_17_RI	0.854575	1	1	0.854575	0.6004	1	0.6149	0.5344	0.854575	1	0.7245	1	1	1	1	1	0.854575	0.5383	1	1	1	0.6004	0.854575	0.781	0.7667	0.854575	1	1	0.854575	0.7046	0.6804	0.7913	1	0.7686	1	0.9071	1	1	1	1	1	0.738	0.8671	0.7348	1	0.6497	0.8493	1	0.7095
UBE2J2_57_ES	0.818	0.6838	0.5374	0.8087	0.579716	0.579716	0.5344	0.4036	0.579716	0.7601	0.2981	0.693	0.3886	0.594	0.7827	0.7355	1	0.574	0.579716	0.5009	0.6584	0.5094	0.3109	0.7046	0.4904	0.8314	0.5193	0.4947	0.649	0.6318	0.421	0.579716	0.579716	0.579716	0.6911	0.579716	0.371	0.697	0.7964	0.599	0.6143	0.6323	0.6931	0.1095	1	0.7636	0.8238	0.71	0.4134
CPSF3L_120_ES	0.920694	0.920694	1	0.920694	1	1	1	1	0.920694	0.8372	1	1	1	0.7381	1	0.8946	0.920694	0.5675	0.5279	1	1	0.7657	0.920694	1	0.8651	1	0.920694	1	1	0.5678	1	1	1	1	1	0.8009	1	0.6083	1	1	1	0.9429	1	1	1	0.8484	1	0.6302	0.8418
AURKAIP1_148_RI	0.637	0.2658	0.4365	0.5112	0.4902	0.6384	0.4716	0.2686	0.7681	0.6804	0.549	0.4274	0.7849	0.651	0.7418	0.3955	0.8955	0.5968	0.8278	1	0.6543	0.6238	0.494	0.5197	0.8086	0.6201	0.4426	0.6624	0.5425	0.6313	0.8044	0.4977	0.3269	0.6679	0.4769	0.586	0.7357	0.4468	0.7443	0.7033	0.5407	0.7184	0.5267	0.4912	0.4789	0.755	0.649	0.4877	0.5149
CCNL2_160_ES	0.4649	0.6235	0.7251	0.5089	0.491	0.53	0.5712	0.618	0.5548	0	0.3885	0.7156	0.444	0.3168	0.5592	0.4622	0	0.6542	0	0.7478	0	0.4561	0.6453	0.2023	0.6943	0.4817	0.7358	0.5127	0	0.7191	0.3478	0.3663	0	0.691	0.6919	0.6962	0.8841	0.5419	0.4631	0.6325	0.6061	0.5226	0.7471	0.6868	0.8579	0.809	0.6709	0.5441	0.2277
CCNL2_161_ES	0	0.0949	0.1745	0.0419	0.2638	0.1308	0.072	0.204	0	0	0.1715	0.1879	0.1332	0.2489	0.1961	0.116	0	0.0611	0	0.2593	0.1662	0.0529	0	0.0932	0.3249	0.2303	0	0.1261	0.0906	0.1785	0.1159	0.2821	0.1845	0.2172	0.4589	0.1518	0.3904	0.1447	0.0419	0	0.2784	0.0698	0.1433	0	0.1185	0.2834	0.1377	0	0
ANKRD65_167_ES	0.4116	0.53126	0.53126	0.3651	0.7367	0.53126	0.7158	0.8995	0.5281	0.53126	0.4349	0.704	0.3774	0.2354	0.1071	1	0.53126	0.395	0.1813	0.53126	0.2514	0.8304	0.4116	0.8629	0.2494	0.2667	1	0.8704	0.4393	0.704	0.1227	0.2306	0.662	0.2856	0.1648	0.2263	0.2186	0.6643	0.5453	0.4273	1	0.2548	0.1572	1	1	0.4369	0.2343	1	1
ANKRD65_168_ES	1	0.793983	0.793983	0.7175	1	0.793983	0.7207	0.7434	0.352	0.793983	1	1	0.4918	1	0.793983	0.6384	0.793983	1	0.7326	0.793983	0.6369	1	0.4591	0.8594	0.5759	0.5093	1	0.8682	0.7918	1	0.793983	1	1	0.6472	0.4254	0.4438	0.5645	0.9308	0.9044	0.6994	1	0.4352	0.3445	1	1	0.6782	0.8286	1	1
SLC35E2B_207_ES	0.5106	0.4205	0.6331	0.549	0.4026	0.2101	0.5074	0.1938	0.2581	0.2146	0.3074	0.2686	0.479	0.4874	0.5379	0.2956	0.5936	0.4812	0.549	0.799	0.4351	0.533	0.3235	0.373	0.414	0.4103	0.5818	0.4431	0.2737	0.6761	0.4103	0.3158	0.5619	0.243	0.309	0.32	0.3086	0.3329	0.426	0.479	0.2959	0.3329	0.4835	0.4834	0.2715	0.388	0.4524	0.2857	0.3641
C1orf86_248_ES	0.1588	0.1978	0.2102	0.092	0.0706	0.1274	0.016	0.0947	0.2543	0.0348	0.0588	0.1852	0.0504	0.1015	0.2712	0.2509	0.2904	0.0589	0.0522	0.4128	0.0921	0.0821	0.0399	0.0895	0.1864	0.0636	0.1538	0.1679	0.1319	0.0538	0.2556	0.0805	0.1003	0.0934	0.0801	0.1693	0.1539	0.1149	0.0716	0.166	0.1143	0.1488	0.1218	0.1431	0.2953	0.1641	0.0923	0.2653	0.1078
C1orf86_249_ES	0.2936	0.2529	0.2594	0.2143	0.0967	0.3367	0.0186	0.2661	0.2852	0.0415	0.1588	0.228	0.0601	0.1319	0.4066	0.3104	0.3589	0.0802	0.0629	0.4927	0.1212	0.2914	0.0976	0.1154	0.2364	0.0754	0.1994	0.2134	0.3212	0.0623	0.2468	0.1455	0.1351	0.1085	0.246	0.2215	0.3339	0.1546	0.1015	0.2082	0.1501	0.1904	0.1629	0.1868	0.369	0.3183	0.1315	0.4058	0.1458
PEX10_267_ES	0.6992	0.6069	0.6074	0.7432	0.6008	0.601808	0.601808	0.4531	0.4911	1	1	0.839	0.4981	0.6346	0.2627	0.6082	0.601808	0.1754	0.601808	0.6142	0.7226	0.4309	0.601808	0.7432	0.2963	0.3684	0.8128	0.5033	0.7907	0.8021	0.7432	0.3667	0.2486	0.6631	0.6366	0.567	0.5757	0.7614	0.6371	0.6984	0.6008	0.4809	0.4764	0.4753	0.2926	0.6142	0.7156	0.6704	0.7664
MEGF6_315_ES	0.6269	0.808145	0.7273	0.8	0.75	0.8276	0.8649	0.6667	0.7368	0.7368	0.7525	0.7917	0.8571	0.8	0.4118	0.8611	1	0.8611	0.5833	0.9153	0.5652	0.8387	0.8387	0.6364	0.5963	1	1	1	0.8077	0.5455	0.8148	0.9315	0.6552	0.918	0.537	0.9057	0.7179	0.8077	0.7727	0.878	0.7273	0.9351	1	0.8889	0.9701	0.6094	0.9091	0.715	0.8571
DFFB_345_ES	0.199348	0.106	0.199348	0.1347	0.199348	0.1215	0.199348	0.1424	0.3563	0.199348	0.094	0.5546	0.1917	0.348	0.1159	0	0.199348	0.1475	0.199348	0.1377	0.1558	0.094	0.199348	0.4829	0.0493	0.199348	0.199348	0.263	0.199348	0.0493	0.2933	0.4276	0.257	0.199348	0.2493	0.2287	0.0767	0.094	0.045	0.1719	0.1719	0.2441	0.1917	0.1215	0.199348	0.0524	0.0716	0.1347	0.1107
DFFB_346_ES	0.6843	0.4816	0.689	0.591	0.6027	0.5099	0.1567	0.7904	0.4263	0.516799	0.6437	0.6692	0.4881	0.7082	0.3104	0.4052	0.5494	0.3514	0.516799	0.5989	0.5201	0.8643	0.4644	0.3422	0.3824	1	0.7521	0.5336	0.6138	0.516799	0.7092	0.6191	0.516799	0.7045	0.4174	0.0978	0.5875	0.4428	0.4159	0.8805	0.6095	0.818	0.5393	0.5704	0.5653	0.6138	0.7762	0.4447	0.5512
NPHP4_354_ES	0	0	0.0073	0	0	0	0.029	0.0148	0	0	0	0.1276	0.0118	0	0.0092	0.0681	0	0	0.0506582	0.0506582	0.0436	0.1037	0.0506582	0	0.0189	0	0	0.0771	0	0.0189	0	0	0.0506582	0.0124	0.1785	0.0059	0	0.07	0.0189	0.0401	0	0.1321	0	0.1055	0.059	1	0	0.0124	0
KCNAB2_367_RI	0.151229	0.151229	0.1017	0.0439	0.0335	0.0612	0.0774	0.0397	0.0764	0.151229	0.0612	0.254	0.1454	0.1087	1	0.0322	0.1183	0.1356	0.1112	0.2451	0.09	0.2755	0.0236	0.0813	0.181	0.1003	0.1374	0.157	0.106	0.1141	0.1519	0.1509	0.0605	0.2055	0.33	0.0724	0.3427	0.0906	0.0715	0.357	0.2158	0.1653	0.291	0.0618	0.291	0.138	0.2098	0.0647	0.098
ICMT_385_ES	0.9653	0.5852	0.7369	0.7874	0.7925	0.7685	0.7253	0.6536	0.809	0.6162	0.7235	0.7396	0.6205	0.8846	0.9119	0.6695	0.7448	0.8095	0.745526	0.7119	0.7192	0.7801	0.9473	0.7867	0.6027	0.7299	0.1282	0.7141	0.871	0.8984	0.8209	0.6191	0.6313	0.7117	0.9216	0.8077	0.8194	0.8671	0.7726	0.7905	0.8215	0.7809	0.791	0.753	0.7426	0.5556	0.72	0.699	0.6792
TNFRSF25_410_RI	0.70582	0.70582	0.5828	0.7688	0.672	0.8582	0.70582	0.7364	0.70582	0.70582	0.7516	0.7487	0.7281	0.867	0.70582	0.6742	0.8984	0.7442	0.7265	0.7845	0.814	0.8934	0.70582	0.5379	0.8073	0.7884	0.8279	0.6336	0.6586	0.8023	0.7751	0.6643	0.5688	0.8455	0.6662	0.6409	0.7097	0.6389	0.6995	0.6953	0.8534	0.7083	0.6058	0.7218	0.626	0.7233	0.7774	0.5959	0.70582
KLHL21_482_RI	0.1871	0.1808	0.3927	0.2227	0.2112	0.1638	0.2571	0.1504	0.2952	0.2905	0.251	0.4647	0.3027	0.3227	0.216	0.1456	0.2875	0.284	0.6212	0.2797	0.1838	0.2831	0.2956	0.1765	0.2243	0.3166	0.2516	0.3802	0.4	0.2752	0.2894	0.2656	0.2033	0.2851	0.1931	0.3853	0.4721	0.2512	0.2016	0.4678	0.2414	0.3774	0.4396	0.1506	0.7247	0.4044	0.3935	0.1638	0.1226
ERRFI1_533_RI	0.1732	0.2115	0.5793	0.1659	0.2162	0.1043	0.6679	0.1813	0.1476	0.2472	0.2112	0.2986	0.2248	0.3856	0.5232	0.1981	0.3952	0.4299	0.315062	0.2565	0.1705	0.2857	0.1072	0.2878	0.1185	0.3873	0.0575	0.5163	0.2605	0.2653	0.3558	0.5196	0.3596	0.2551	0.2933	0.5142	0.5442	0.2233	0.1821	0.4638	0.2435	0.3978	0.2955	0.274	0.9139	0.4447	0.4138	0.3379	0.2263
ERRFI1_536_ES	0.7976	0.833	0.803	0.6972	0.7455	0.8986	0.7747	0.7792	1	0.783949	0.7759	0.8345	0.783949	0.8489	0.8206	0.6561	0.8677	0.6467	0.783949	0.9244	0.8672	0.661	1	0.5591	0.8769	1	0.783949	0.7727	0.783949	1	0.7938	0.6898	0.7017	0.7143	0.4925	0.8811	0.8642	0.7904	0.5297	0.7877	0.9108	0.7841	0.6131	0.505	0.783949	0.9074	0.6584	0.8507	0.8457
GPR157_558_ES	0.8132	0.669	0.8615	0.6086	0.8076	1	0.8017	0.8536	1	0.835819	0.8519	1	0.8326	0.6852	0.8095	0.8899	0.7255	1	0.835819	0.8899	1	1	1	0.8185	0.8818	1	0.835819	0.9256	0.7367	0.906	1	0.6971	0.7567	0.7045	0.6999	0.6852	0.8235	0.6238	0.8615	0.6852	0.8818	0.8615	0.7567	0.7627	0.835819	0.6789	0.6179	0.9438	0.9289
CLSTN1_575_ES	0.3487	0.1389	0.1275	0.1522	0.1446	0.06	0.1265	0.0979	0.1869	0.1536	0.1905	0.2534	0.1915	0.2269	0.1982	0.1259	0.1543	0.2566	0.1317	0.1557	0.2262	0.2253	0.2808	0.0958	0.1283	0.1769	0.0075	0.1403	0.146	0.285	0.3554	0.1604	0.1503	0.1606	0.1585	0.4448	0.2571	0.3533	0.1825	0.3744	0.0711	0.2858	0.1746	0.1417	0.6455	0.2995	0.1009	0.081	0.0454
RBP7_592_ES	0.0969	0.3034	0.3443	0.2911	0.2251	0.3922	0.1752	0.3245	0.2009	0.2699	0.1142	0.1829	0.23	0.2744	0.2213	0.1871	0.2863	0.1378	0.1532	0.276	0.3462	0.2723	0.0889	0.2938	0.2032	0.0994	0.2646	0.1844	0.1227	0.1408	0.1729	0.2317	0.214	0.2911	0.2187	0.2495	0.3456	0.1975	0.1658	0.2251	0.2678	0.3405	0.4207	0.4302	0.4335	0.3173	0.3262	0.2955	0.2373
TARDBP_635_ES	0.1352	0.1012	0.2177	0.1403	0.1667	0.0899	0.1359	0.136	0.0989	0.1667	0.1627	0.1943	0.1743	0.197	0.1359	0.1009	0.1801	0.1608	0.5614	0.1504	0.128	0.1925	0.1279	0.1473	0.1351	0.186	0.4565	0.3271	0.434	0.1449	0.1874	0.1924	0.129	0.2	0.1463	0.3505	0.2549	0.1242	0.1988	0.3038	0.1237	0.2045	0.1678	0.1093	0.43	0.2273	0.2461	0.0978	0.086
EXOSC10_647_ES	0.4815	0.3413	0.4911	0.4796	0.4952	0.3396	0.3964	0.4372	0.43	0.5794	0.506	0.5369	0.5507	0.5249	0.4288	0.3869	0.4755	0.4274	0.8638	0.4209	0.4915	0.512	0.6256	0.4186	0.4872	0.7345	0.7737	0.5191	0.8438	0.5058	0.6133	0.5136	0.4631	0.5669	0.4798	0.5882	0.5385	0.5307	0.5994	0.594	0.4875	0.5138	0.5455	0.3769	0.7324	0.54	0.5663	0.3737	0.3468
FBXO44_658_ES	0	0.0311	0.234	0.1136	0	0.2497	0	0.1778	0	0.2671	0.1931	0.1963	0	0.091	0	0.0959	0	0.0453	0	0.2035	0.1112	0.2078	0.0965	0	0.1615	0.121	0.1252	0.1353	0.1286	0	0.1516	0.102	0.0537	0.104	0.0637	0.2714	0.3003	0.1383	0.1416	0.3475	0.1488	0.2643	0.3733	0.0517	0.1569	0.3797	0.3058	0.0466	0.0352
MAD2L2_665_ES	1	0.2043	0.4253	0.3367	0.3478	0.528	0.8864	0.4989	1	0.3775	0.7162	0.3467	0.3592	0.4888	1	0.3535	1	0.3591	0.9143	0.2141	0.2756	0.4565	1	0.4294	0.6189	0.4403	0.3477	0.4888	0.7923	0.4703	0.508	0.3998	0.3918	0.2453	0.2426	0.5579	0.2937	0.8605	0.6958	0.3691	0.3778	0.5115	0.1955	0.3996	0.5033	0.4329	0.2919	0.2	0.6325
AGTRAP_675_ES	0.857099	1	0.8111	1	0.5076	1	1	0.7948	1	0.4295	0.7519	0.8778	0.9064	1	0.6597	0.8613	0.857099	1	0.857099	1	0.6915	1	0.6167	0.7765	0.9137	1	0.857099	0.7826	0.825	0.857099	0.7634	0.894	1	0.6934	0.8156	0.9185	0.8414	1	0.9248	0.7956	1	0.8747	1	1	0.8749	1	1	1	0.6939
CLCN6_689_ES	0.7564	0.7853	0.6549	0.7072	0.8677	0.5087	0.6949	0.7788	0.8118	0.535	0.8646	0.5799	0.453	0.6148	0.781	0.8194	0.742	0.82	0.729972	0.7973	0.5695	0.571	0.7341	0.6045	0.7389	0.6083	0.4729	0.8055	0.729972	0.4792	0.6883	0.5849	0.5641	0.4944	0.4461	0.7029	0.5799	0.6193	0.7279	0.1472	0.6459	0.801	0.6459	0.7401	0.729972	0.7782	0.5859	0.8381	0.7035
PRDM2_723_ES	1	0.8415	0.6957	0.8169	0.7717	0.7885	1	0.7782	1	1	0.9175	0.6522	0.8424	0.6611	0.7721	0.9245	1	0.8963	1	0.9498	0.7184	0.9433	0.7608	1	0.6594	0.6759	0.4795	0.8445	0.6352	0.810689	1	0.9427	0.9082	0.7061	0.852	1	0.8358	1	0.797	1	0.8721	0.8728	0.7905	0.8408	1	0.9338	0.9662	0.8356	0.6599
PRDM2_724_ES	0.193323	0.2543	0.0969	0.1828	0.1731	0.3925	0.2989	0.0797	0.4268	0.193323	0.7404	0.3469	0.0796	0.1074	0.0844	0.2827	0.2903	0.0985	0.1527	0.1234	0.1432	0.1906	0.3002	0.6055	0.0401	0.193323	0.0523	0.1337	0.193323	0.193323	0.0558	0.1481	0.3494	0	0.193323	0.1958	0.275	0.1774	0.2639	0.1332	0.1232	0.083	0.1417	0.065	0	0.2646	0.1316	0.1127	0.1573
[truncated: 7,673 more rows]
[truncated: 393 more columns]

## Sheet: Table S2
Table S2. Clinical and demographic data of 65 patients treated with anti-PD1 therapy.
[truncated: 66 more rows]

## Sheet: Table S3
Table S3. Clinical and demographic data of 442 PTC patients in Clusters 0, 1 and 2.
[truncated: 443 more rows]
